# Supplementary material for: Protamine Characterization by Top-Down Proteomics: Boosting Proteoform Identification with DBSCAN
Source: MDPI journal article supplement (doi:10.3390/proteomes9020021), 2021-04-30
Supplement: s1 [file s1]

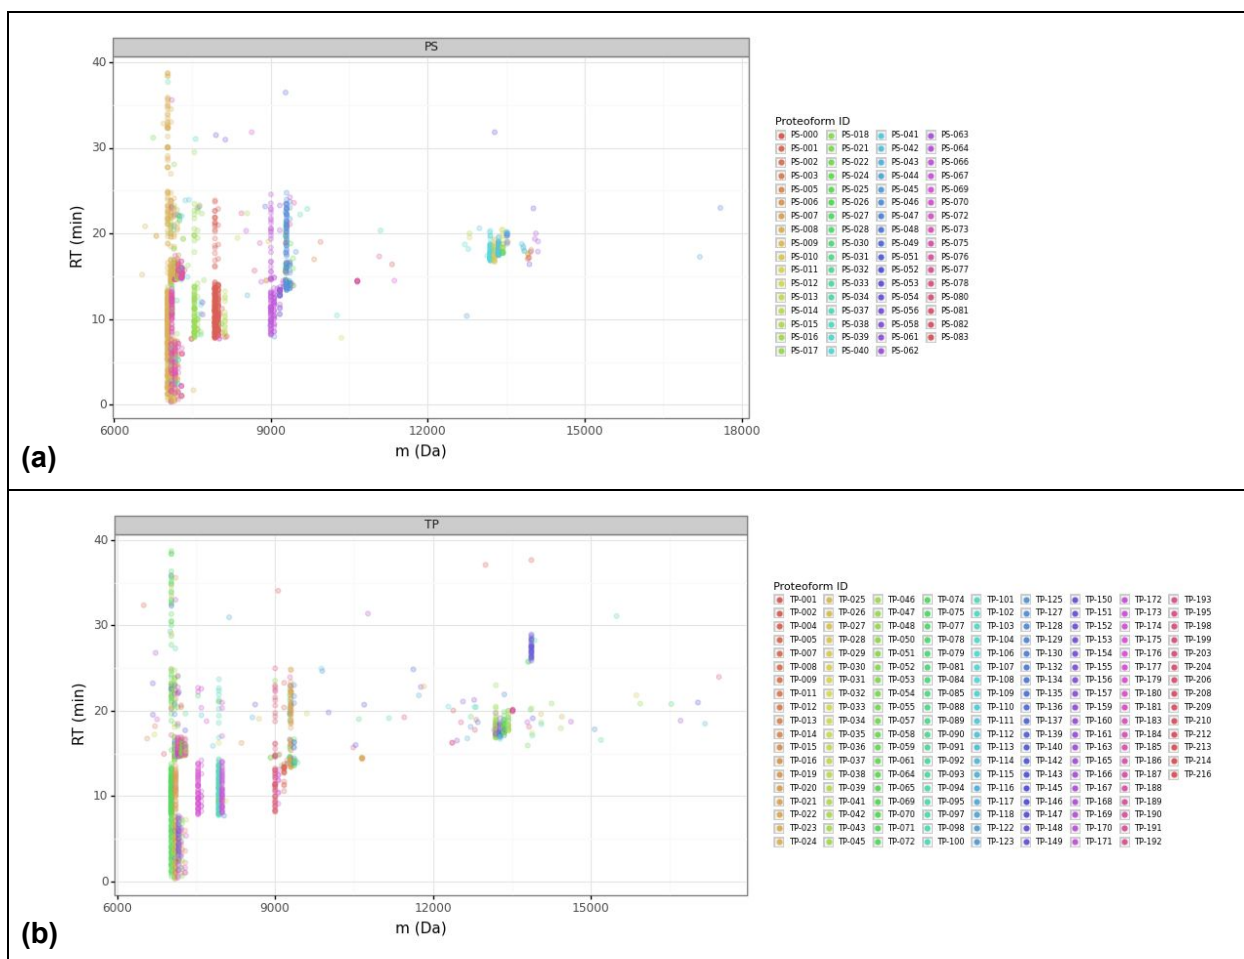

**Figure S1.** Scatterplots of the retention time ( $RT$ ) vs. the deconvoluted experimental mass ( $m$ ) by proteoform ID. The sequential color scale highlights the proteoform IDs assigned to each PrSM according to a) PS or b) TP.

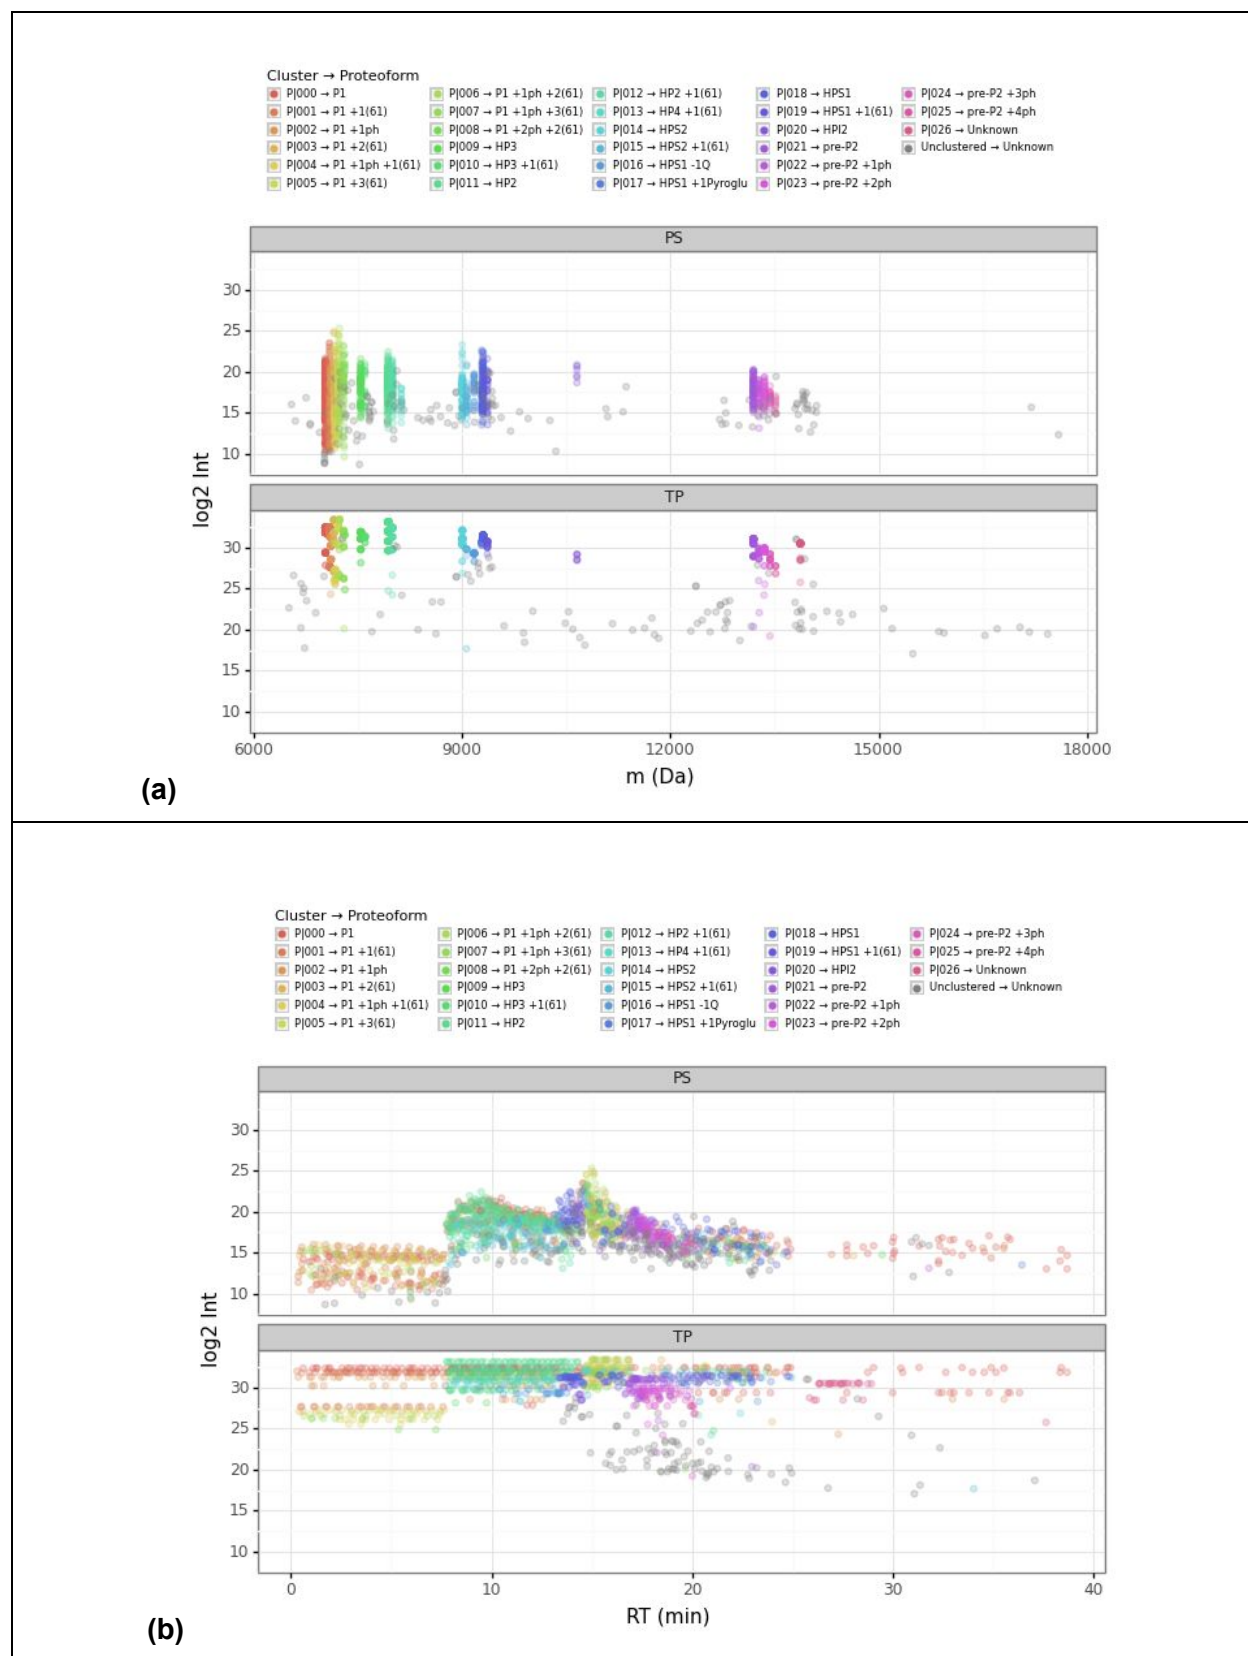

**Figure S2.** Scatterplots of the intensity ( $\log_2 \text{Int}$ ) vs. the deconvoluted experimental mass ( $m$ ) and the retention time ( $RT$ ) for PS and TP by cluster. The sequential color scale highlights the clusters obtained sorted by increasing experimental mass, while unclustered PrSMs appear in grey. a)  $\log_2 \text{Int}$  vs.  $m$  projection. b)  $\log_2 \text{Int}$  vs.  $RT$  projection. (ph = phosphorylation, Q = glutamine, pyroGlu = pyroglutamic acid).

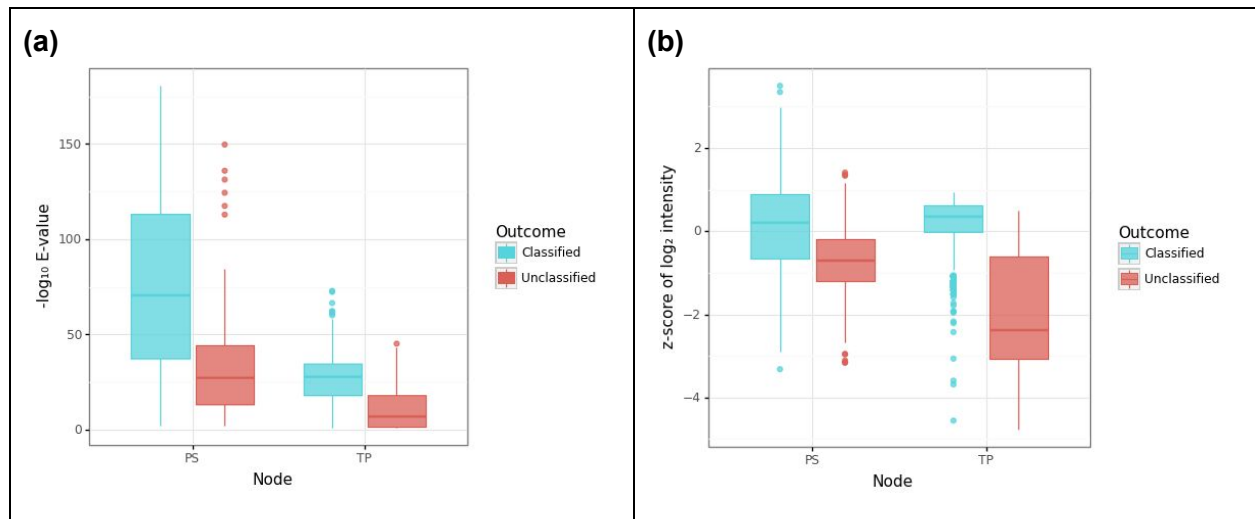

**Figure S3.** Boxplot of  $-\log_{10}$  E-value and z-score of  $\log_2$  intensity vs. Node by outcome (classified and unclassified PrSMs).
