# Supplementary material for: Protamine Characterization by Top-Down Proteomics: Boosting Proteoform Identification with DBSCAN
Source: Proteomes. 2021 Apr 30;9(2):21. doi: 10.3390/proteomes9020021 (PMC8162566; doi:10.3390/proteomes9020021)
Supplement: Supplementary file 1 [file proteomes-09-00021-s001.zip › Table S1.xlsx]

## Sheet: Sheet1
Cluster	Hits	Size	Ratio	Cluster - Protein (Auto)	Cluster - Protein (Revised)	Cluster - m (Da)	Cluster - Δm (Da) (Auto)	Cluster - Δm (Da) (Revised)	Cluster - Proteoform (Revised)	Cluster - Modification (Revised)
P|000	449	453	0.991	P1	P1	7029.45	-0.142464	-0.142464	P1	Unmod
P|001	249	253	0.984	P1	P1	7090.92	61.3199	61.3199	P1 +1(61)	+1(61)
P|002	141	145	0.972	P1	P1	7108.86	79.2658	79.2658	P1 +1ph	+1ph
P|003	108	117	0.923	P1	P1	7151.59	121.996	121.996	P1 +2(61)	+2(61)
P|004	83	83	1	P1	P1	7170.39	140.792	140.792	P1 +1ph +1(61)	+1ph +1(61)
P|005	104	105	0.99	P1	P1	7212.91	183.318	183.318	P1 +3(61)	+3(61)
P|006	48	49	0.98	P1	P1	7231.82	202.228	202.228	P1 +1ph +2(61)	+1ph +2(61)
P|007	63	71	0.887	P1	P1	7293.52	263.924	263.924	P1 +1ph +3(61)	+1ph +3(61)
P|008	11	12	0.917	P1	P1	7310.92	281.323	281.323	P1 +2ph +2(61)	+2ph +2(61)
P|009	122	125	0.976	HP3	HP3	7538.54	-0.533	-0.533	HP3	Unmod
P|010	30	30	1	HP3	HP3	7599.63	60.5645	60.5645	HP3 +1(61)	+1(61)
P|011	260	261	0.996	HP2	HP2	7932.73	-0.547389	-0.547389	HP2	Unmod
P|012	115	115	1	HP2	HP2	7994.03	60.7544	60.7544	HP2 +1(61)	+1(61)
P|013	15	16	0.938	HP4	HP4	8122.66	60.3418	60.3418	HP4 +1(61)	+1(61)
P|014	122	123	0.992	HPS2	HPS2	9002.09	-0.655389	-0.655389	HPS2	Unmod
P|015	39	41	0.951	HPS2	HPS2	9063.4	60.6553	60.6553	HPS2 +1(61)	+1(61)
P|016	37	42	0.881	Unidentified	HPS1	9172.08		-128.832	HPS1 -1Q	-1Q
P|017	27	47	0.574	HPS1	HPS1	9283.32	-17.5902	-17.5902	HPS1 +1Pyroglu	+1Pyroglu
P|018	127	149	0.852	HPS1	HPS1	9301.17	0.25295	0.25295	HPS1	Unmod
P|019	37	41	0.902	HPS1	HPS1	9363.59	62.6746	62.6746	HPS1 +1(61)	+1(61)
P|020	12	12	1	HPI2	HPI2	10654	-0.488359	-0.488359	HPI2	Unmod
P|021	109	109	1	pre-P2	pre-P2	13196	-0.845862	-0.845862	pre-P2	Unmod
P|022	49	49	1	pre-P2	pre-P2	13275.9	79.1214	79.1214	pre-P2 +1ph	+1ph
P|023	55	57	0.965	pre-P2	pre-P2	13355.9	159.1	159.1	pre-P2 +2ph	+2ph
P|024	31	31	1	pre-P2	pre-P2	13435.6	238.822	238.822	pre-P2 +3ph	+3ph
P|025	13	14	0.929	pre-P2	pre-P2	13515.5	318.68	318.68	pre-P2 +4ph	+4ph
P|026	28	28	1	Unidentified	Unknown	13873.2			Unknown	Unknown
Unclustered	86	260	0.331	Unidentified	Unknown	10326.5			Unknown	Unknown
