# Supplementary material for: Protamine Characterization by Top-Down Proteomics: Boosting Proteoform Identification with DBSCAN
Source: Proteomes. 2021 Apr 30;9(2):21. doi: 10.3390/proteomes9020021 (PMC8162566; doi:10.3390/proteomes9020021)
Supplement: Supplementary file 1 [file proteomes-09-00021-s001.zip › Table S2.xlsx]

## Sheet: Sheet1
BioRep	TechRep	File	Node	Scan	Int	log2 Int	z log2 Int	RT (min)	m (Da)	Δm (Da) (Auto)	Δm (Da) (Revised)	Protein	Protein (own search)	Proteins (own search)	Sequence	Ann. Seq.	Modifications	Start	Stop	Targets	Positions	Positions (abs.)	Probabilities	C-Score	-log E	Proteoform ID	Count (ph)	Cluster	Cluster - m (Da)	Cluster - Δm (Da) (Revised)	Cluster - Protein (Revised)	Cluster - Proteoform (Revised)	Cluster - Modification (Revised)	Cluster - Protein (Auto)	Cluster → Proteoform
A	R01	A_R01	TP	1126	6640000	22.6628	-2.77092	32.367	6505.41			P04553	Unidentified	['P1']	ARYRCCRSQSRSRYYRQRQRSRRRRRRSCQTRRRAMRCCRPRYRP	M.ARYR(C)[Carbamidomethylation](C)[Carbamidomethylation]RSQSRSRYYR(QRQRS)[241.3064]RRRRRRS(C)[Carbamidomethylation]QTRRRAMR(C)[Carbamidomethylation](C)[Carbamidomethylation]RPRYRP.R		2	46	[]	[]	[]	[]		1.96952	TP-002	0	Unclustered	10326.5		Unknown	Unknown	Unknown	Unidentified	Unclustered → Unknown
A	R02	A_R02	PS	523	65017.4	15.9885	-0.194624	15.188	6540.23			Sperm protamine P1	P1	['P1']	ARYRCCRSQSRSRYYRQRQRSRRRRRRSCQTRRRAMRCCRPRYRPRCRRH	ARYRccRSQSRSRYYRQRQRSRRRRRRScQTRRRAMRccRPRYRPRcRRH	C5(Carbamidomethyl); C6(Carbamidomethyl); C29(Carbamidomethyl); C38(Carbamidomethyl); C39(Carbamidomethyl); C47(Carbamidomethyl)	2	51	[]	[]	[]	[]	9999	57.08	PS-008	0	Unclustered	10326.5		Unknown	Unknown	Unknown	Unidentified	Unclustered → Unknown
B	R03	B_R03	TP	581	104100000	26.6334	-0.943164	16.7432	6571.15			P04553	P1	['P1']	ARYRCCRSQSRSRYYRQRQRSRRRRRRSCQTRRRAMRCCRPRYRPRCRRH	M.ARYR(C)[Carbamidomethylation](C)[Carbamidomethylation]RSQSRSRYYRQRQRSRRRR(RRS(C)[Carbamidomethylation]QTRRRAMR(C)[Carbamidomethylation](C)[Carbamidomethylation]RPR)[-458.3928]YRPR(C)[Carbamidomethylation]RRH.		2	51	[]	[]	[]	[]		1.02699	TP-014	0	Unclustered	10326.5		Unknown	Unknown	Unknown	Unidentified	Unclustered → Unknown
A	R02	A_R02	PS	723	16194.6	13.9832	-1.02415	20.8331	6596.94			Sperm protamine P1	P1	['P1']	ARYRCCRSQSRSRYYRQRQRSRRRRRRSCQTRRRAMRCCRPRYRPRCRRH	ARYRccRSQSRSRYYRQRQRSRRRRRRScQTRRRAMRccRPRYRPRcRRH	C5(Carbamidomethyl); C6(Carbamidomethyl); C29(Carbamidomethyl); C38(Carbamidomethyl); C39(Carbamidomethyl); C47(Carbamidomethyl)	2	51	[]	[]	[]	[]	203.683	7.53	PS-008	0	Unclustered	10326.5		Unknown	Unknown	Unknown	Unidentified	Unclustered → Unknown
A	R01	A_R01	TP	812	1231000	20.2314	-3.63956	23.2188	6677.41			P04554	Unidentified	['pre-P2', 'HPI2', 'HPS1', 'HPS2', 'HP4', 'HP2', 'HP3']	RHCSRRRLHRIHRRQHRSCRRRKRRSCRHRRRHRRGCRTRKRTCRRH	R.RH(C)[Carbamidomethylation]SRR(RLHRIHRRQHRS(C)[Carbamidomethylation]R)[22.6238]RRKRRS(C)[Carbamidomethylation]RHRRRHRRG(C)[Carbamidomethylation]RTRKRT(C)[Carbamidomethylation]RRH.		56	102	[]	[]	[]	[]		11.4434	TP-152	0	Unclustered	10326.5		Unknown	Unknown	Unknown	Unidentified	Unclustered → Unknown
A	R02	A_R02	TP	679	51030000	25.6048	-1.50037	19.5403	6679.38			P04554	Unidentified	['pre-P2', 'HPI2', 'HPS1', 'HPS2', 'HP4', 'HP2', 'HP3']	RHCSRRRLHRIHRRQHRSCRRRKRRSCRHRRRHRRGCRTRKRTCRRH	R.(RH(C)[Carbamidomethylation]S)[24.9440]RRRLHRIHRRQHRS(C)[Carbamidomethylation]RRRKRRS(C)[Carbamidomethylation]RHRRRHRRG(C)[Carbamidomethylation]RTRKRT(C)[Carbamidomethylation]RRH.		56	102	[]	[]	[]	[]		14.4424	TP-151	0	Unclustered	10326.5		Unknown	Unknown	Unknown	Unidentified	Unclustered → Unknown
A	R01	A_R01	TP	606	23960000	24.5141	-2.10948	17.2137	6709.35			P04554	Unidentified	['pre-P2', 'HPI2', 'HPS1', 'HPS2', 'HP4', 'HP2', 'HP3']	RHCSRRRLHRIHRRQHRSCRRRKRRSCRHRRRHRRGCRTRKRTCRRH	R.(RH(C)[Carbamidomethylation])[54.9190]SRRRLHRIHRRQHRS(C)[Carbamidomethylation]RRRKRRS(C)[Carbamidomethylation]RHRRRHRRG(C)[Carbamidomethylation]RTRKRT(C)[Carbamidomethylation]RRH.		56	102	[]	[]	[]	[]		23.3928	TP-036	0	Unclustered	10326.5		Unknown	Unknown	Unknown	Unidentified	Unclustered → Unknown
B	R03	B_R03	TP	635	34960000	25.0592	-1.45575	18.1977	6718.36			P04554	Unidentified	['pre-P2', 'HPI2', 'HPS1', 'HPS2', 'HP4', 'HP2', 'HP3']	RRRHCSRRRLHRIHRRQHRSCRRRKRRSCRHRRRHRRGCRTRKRTCRRH	Y.(RRRH(C)[Carbamidomethylation]S)[-248.2713]RRRLHRIHRRQHRS(C)[Carbamidomethylation]RRRKRRS(C)[Carbamidomethylation]RHRRRHRRG(C)[Carbamidomethylation]RTRKRT(C)[Carbamidomethylation]RRH.		54	102	[]	[]	[]	[]		17.8756	TP-011	0	Unclustered	10326.5		Unknown	Unknown	Unknown	Unidentified	Unclustered → Unknown
A	R02	A_R02	TP	927	220600	17.7511	-4.19092	26.7862	6730.65			P04553	P1	['P1']	ARYRCCRSQSRSRYYRQRQRSRRRRRRSCQTRRRAMRCCRPRYRPRCRRH	M.ARYR(C)[Carbamidomethylation](C)[Carbamidomethylation]RSQSRSRYYRQ(RQRSRRRRRRS(C)[Carbamidomethylation]QTRRRAMR(C)[Carbamidomethylation](C)[Carbamidomethylation]RPR)[-298.7495]YRPR(C)[Carbamidomethylation]RRH.		2	51	[]	[]	[]	[]		6.64629	TP-166	0	Unclustered	10326.5		Unknown	Unknown	Unknown	Unidentified	Unclustered → Unknown
B	R03	B_R03	PS	1079	114998	16.8113	0.200673	31.1758	6751.34			Sperm protamine P1	P1	['P1']	ARYRCCRSQSRSRYYRQRQRSRRRRRRSCQTRRRAMRCCRPRYRPRCRRH	aRYRccRSQsRSRYYRQRQRSRRRRRRScQTRRRAMRccRPRYRPRcRRH	A1(alpha-amino acetylated residue); C5(Carbamidomethyl); C6(Carbamidomethyl); S10(O-phospho-L-serine); C29(Carbamidomethyl); C38(Carbamidomethyl); C39(Carbamidomethyl); C47(Carbamidomethyl)	2	51	['S']	[10]	[11]	[]	1	2.7	PS-022	1	Unclustered	10326.5		Unknown	Unknown	Unknown	Unidentified	Unclustered → Unknown
B	R04	B_R04	TP	687	12110000	23.5297	-2.33389	18.9938	6759.29			P04554	Unidentified	['pre-P2', 'HPI2', 'HPS1', 'HPS2', 'HP4', 'HP2', 'HP3']	RRHCSRRRLHRIHRRQHRSCRRRKRRSCRHRRRHRRGCRTRKRTCRRH	R.(RRH(C)[Carbamidomethylation]S)[-51.2442]RRRLHRIHRRQHRS(C)[Carbamidomethylation]RRRKRRS(C)[Carbamidomethylation]RHRRRHRRG(C)[Carbamidomethylation]RTRKRT(C)[Carbamidomethylation]RRH.		55	102	[]	[]	[]	[]		15.6224	TP-180	0	Unclustered	10326.5		Unknown	Unknown	Unknown	Unidentified	Unclustered → Unknown
A	R01	A_R01	PS	692	12873.5	13.6521	-1.60896	19.707	6809.05			Sperm protamine P1	P1	['P1']	ARYRCCRSQSRSRYYRQRQRSRRRRRRSCQTRRRAMRCCRPRYRPRCRRH	ARYRccRSQSRSRYYRQRQRSRRRRRRScQTRRRAMRccRPRYRPRcRRH	C5(Carbamidomethyl); C6(Carbamidomethyl); C29(Carbamidomethyl); C38(Carbamidomethyl); C39(Carbamidomethyl); C47(Carbamidomethyl)	2	51	[]	[]	[]	[]	113.716	3.19	PS-008	0	Unclustered	10326.5		Unknown	Unknown	Unknown	Unidentified	Unclustered → Unknown
A	R01	A_R01	PS	692	11300	13.464	-1.69715	19.707	6810.19			Sperm protamine P1	P1	['P1']	ARYRCCRSQSRSRYYRQRQRSRRRRRRSCQTRRRAMRCCRPRYRPRCRRH	ARYRccRSQSRSRYYRQRQRSRRRRRRScQTRRRAMRccRPRYRPRcRRH	C5(Carbamidomethyl); C6(Carbamidomethyl); C29(Carbamidomethyl); C38(Carbamidomethyl); C39(Carbamidomethyl); C47(Carbamidomethyl)	2	51	[]	[]	[]	[]	113.311	3.19	PS-008	0	Unclustered	10326.5		Unknown	Unknown	Unknown	Unidentified	Unclustered → Unknown
B	R04	B_R04	TP	525	4353000	22.0536	-2.77684	14.9368	6889.48			P04554	Unidentified	['pre-P2', 'HPI2', 'HPS1', 'HPS2', 'P2-2']	SPEHVEVYERTHGQSHYRRRHCSRRRLHRIHRRQHRSCRRRKRRSCRHRRR	L.SPEHVEVYERTHGQSHYRRRH(C)[Carbamidomethylation]SRRRLHRIHRRQHRS(C)[Carbamidomethylation]RRRKRRS(C)[Carbamidomethylation]RHRR(R)[-38.9615].H		37	87	[]	[]	[]	[]		10.1093	TP-210	0	Unclustered	10326.5		Unknown	Unknown	Unknown	Unidentified	Unclustered → Unknown
B	R04	B_R04	PS	1161	6087.23	12.5716	-2.14738	32.8239	6945.53			Sperm protamine P1	P1	['P1']	ARYRCCRSQSRSRYYRQRQRSRRRRRRSCQTRRRAMRCCRPRYRPRCRRH	ARYRccRSQSRSRYYRQRQRSRRRRRRScQTRRRAMRccRPRYRPRcRRH	C5(Carbamidomethyl); C6(Carbamidomethyl); C29(Carbamidomethyl); C38(Carbamidomethyl); C39(Carbamidomethyl); C47(Carbamidomethyl)	2	51	[]	[]	[]	[]	171.579	12.74	PS-008	0	Unclustered	10326.5		Unknown	Unknown	Unknown	Unidentified	Unclustered → Unknown
B	R04	B_R04	TP	1041	95870000	26.5146	-1.43819	29.3045	7009.35			P04554-2	Unidentified	['pre-P2', 'P2-2']	VRYRVRSLSERSHEVYRQQLHGQEQGHHGQEEQGLSPEHVEVYERTHGQSHYRRRH	M.(V)[Acetyl]R(YRVRSLSERSHEVYRQQ)[114.0406]LHGQEQGHHGQEEQGLSPEHVEVYERTHGQSHYRRRH.C		2	57	[]	[]	[]	[]		1.84487	TP-113	0	Unclustered	10326.5		Unknown	Unknown	Unknown	Unidentified	Unclustered → Unknown
A	R02	A_R02	PS	239	459.88	8.84511	-3.1496	7.1941	7016.59			Sperm protamine P1	P1	['P1']	ARYRCCRSQSRSRYYRQRQRSRRRRRRSCQTRRRAMRCCRPRYRPRCRRH	ARYRccRSQSRSRYYRQRQRSRRRRRRScQTRRRAMRccRPRYRPRcRRH	C5(Carbamidomethyl); C6(Carbamidomethyl); C29(Carbamidomethyl); C38(Carbamidomethyl); C39(Carbamidomethyl); C47(Carbamidomethyl)	2	51	[]	[]	[]	[]	470.5	19.76	PS-008	0	Unclustered	10326.5		Unknown	Unknown	Unknown	Unidentified	Unclustered → Unknown
A	R02	A_R02	PS	73	447.37	8.80532	-3.16606	2.1717	7017.56			Sperm protamine P1	P1	['P1']	ARYRCCRSQSRSRYYRQRQRSRRRRRRSCQTRRRAMRCCRPRYRPRCRRH	ARYRccRSQSRSRYYRQRQRSRRRRRRScQTRRRAMRccRPRYRPRcRRH	C5(Carbamidomethyl); C6(Carbamidomethyl); C29(Carbamidomethyl); C38(Carbamidomethyl); C39(Carbamidomethyl); C47(Carbamidomethyl)	2	51	[]	[]	[]	[]	412.383	23.74	PS-008	0	Unclustered	10326.5		Unknown	Unknown	Unknown	Unidentified	Unclustered → Unknown
A	R02	A_R02	PS	199	639.34	9.32044	-2.95298	5.9828	7017.56			Sperm protamine P1	P1	['P1']	ARYRCCRSQSRSRYYRQRQRSRRRRRRSCQTRRRAMRCCRPRYRPRCRRH	ARYRccRSQSRSRYYRQRQRSRRRRRRScQTRRRAMRccRPRYRPRcRRH	C5(Carbamidomethyl); C6(Carbamidomethyl); C29(Carbamidomethyl); C38(Carbamidomethyl); C39(Carbamidomethyl); C47(Carbamidomethyl)	2	51	[]	[]	[]	[]	440.36	17.85	PS-008	0	Unclustered	10326.5		Unknown	Unknown	Unknown	Unidentified	Unclustered → Unknown
B	R03	B_R03	PS	119	893.81	9.80382	-2.51633	3.5429	7017.58			Sperm protamine P1	P1	['P1']	ARYRCCRSQSRSRYYRQRQRSRRRRRRSCQTRRRAMRCCRPRYRPRCRRH	ARYRccRSQSRSRYYRQRQRSRRRRRRScQTRRRAMRccRPRYRPRcRRH	C5(Carbamidomethyl); C6(Carbamidomethyl); C29(Carbamidomethyl); C38(Carbamidomethyl); C39(Carbamidomethyl); C47(Carbamidomethyl)	2	51	[]	[]	[]	[]	499.721	17.7	PS-008	0	Unclustered	10326.5		Unknown	Unknown	Unknown	Unidentified	Unclustered → Unknown
A	R02	A_R02	PS	179	492.94	8.94527	-3.10817	5.3778	7018.54			Sperm protamine P1	P1	['P1']	ARYRCCRSQSRSRYYRQRQRSRRRRRRSCQTRRRAMRCCRPRYRPRCRRH	ARYRccRSQSRSRYYRQRQRSRRRRRRScQTRRRAMRccRPRYRPRcRRH	C5(Carbamidomethyl); C6(Carbamidomethyl); C29(Carbamidomethyl); C38(Carbamidomethyl); C39(Carbamidomethyl); C47(Carbamidomethyl)	2	51	[]	[]	[]	[]	339.698	11.61	PS-008	0	Unclustered	10326.5		Unknown	Unknown	Unknown	Unidentified	Unclustered → Unknown
B	R03	B_R03	PS	247	1080.39	10.0773	-2.41028	7.4021	7020.57			Sperm protamine P1	P1	['P1']	ARYRCCRSQSRSRYYRQRQRSRRRRRRSCQTRRRAMRCCRPRYRPRCRRH	ARYRccRSQSRSRYYRQRQRSRRRRRRScQTRRRAMRccRPRYRPRcRRH	C5(Carbamidomethyl); C6(Carbamidomethyl); C29(Carbamidomethyl); C38(Carbamidomethyl); C39(Carbamidomethyl); C47(Carbamidomethyl)	2	51	[]	[]	[]	[]	289.33	41.6	PS-008	0	Unclustered	10326.5		Unknown	Unknown	Unknown	Unidentified	Unclustered → Unknown
B	R03	B_R03	PS	227	1154.87	10.1735	-2.37299	6.8004	7022.59			Sperm protamine P1	P1	['P1']	ARYRCCRSQSRSRYYRQRQRSRRRRRRSCQTRRRAMRCCRPRYRPRCRRH	ARYRccRSQSRSRYYRQRQRSRRRRRRScQTRRRAMRccRPRYRPRcRRH	C5(Carbamidomethyl); C6(Carbamidomethyl); C29(Carbamidomethyl); C38(Carbamidomethyl); C39(Carbamidomethyl); C47(Carbamidomethyl)	2	51	[]	[]	[]	[]	377.19	46.31	PS-008	0	Unclustered	10326.5		Unknown	Unknown	Unknown	Unidentified	Unclustered → Unknown
B	R03	B_R03	PS	66	2442.12	11.2539	-1.95409	1.945	7023.59	-6.00598	-6.00598	Sperm protamine P1	P1	['P1']	ARYRCCRSQSRSRYYRQRQRSRRRRRRSCQTRRRAMRCCRPRYRPRCRRH	ARYRccRSQSRSRYYRQRQRSRRRRRRScQTRRRAMRccRPRYRPRcRRH	C5(Carbamidomethyl); C6(Carbamidomethyl); C29(Carbamidomethyl); C38(Carbamidomethyl); C39(Carbamidomethyl); C47(Carbamidomethyl)	2	51	[]	[]	[]	[]	183.418	39.26	PS-008	0	P|000	7029.45	-0.142464	P1	P1	Unmod	P1	P|000 → P1
B	R03	B_R03	PS	45	2230.77	11.1233	-2.00472	1.3141	7025.58	-4.01178	-4.01178	Sperm protamine P1	P1	['P1']	ARYRCCRSQSRSRYYRQRQRSRRRRRRSCQTRRRAMRCCRPRYRPRCRRH	ARYRccRSQSRSRYYRQRQRSRRRRRRScQTRRRAMRccRPRYRPRcRRH	C5(Carbamidomethyl); C6(Carbamidomethyl); C29(Carbamidomethyl); C38(Carbamidomethyl); C39(Carbamidomethyl); C47(Carbamidomethyl)	2	51	[]	[]	[]	[]	386.546	49.48	PS-008	0	P|000	7029.45	-0.142464	P1	P1	Unmod	P1	P|000 → P1
A	R01	A_R01	PS	456	44059.8	15.4272	-0.776604	13.2212	7025.6	-3.99888	-3.99888	Sperm protamine P1	P1	['P1']	ARYRCCRSQSRSRYYRQRQRSRRRRRRSCQTRRRAMRCCRPRYRPRCRRH	ARYRccRSQSRSRYYRQRQRSRRRRRRScQTRRRAMRccRPRYRPRcRRH	C5(Carbamidomethyl); C6(Carbamidomethyl); C29(Carbamidomethyl); C38(Carbamidomethyl); C39(Carbamidomethyl); C47(Carbamidomethyl)	2	51	[]	[]	[]	[]	367.353	104.52	PS-008	0	P|000	7029.45	-0.142464	P1	P1	Unmod	P1	P|000 → P1
A	R01	A_R01	PS	338	221641	17.7579	0.316296	9.9076	7025.6	-3.99888	-3.99888	Sperm protamine P1	P1	['P1']	ARYRCCRSQSRSRYYRQRQRSRRRRRRSCQTRRRAMRCCRPRYRPRCRRH	ARYRccRSQSRSRYYRQRQRSRRRRRRScQTRRRAMRccRPRYRPRcRRH	C5(Carbamidomethyl); C6(Carbamidomethyl); C29(Carbamidomethyl); C38(Carbamidomethyl); C39(Carbamidomethyl); C47(Carbamidomethyl)	2	51	[]	[]	[]	[]	442.336	92.06	PS-008	0	P|000	7029.45	-0.142464	P1	P1	Unmod	P1	P|000 → P1
B	R04	B_R04	PS	987	25094.7	14.6151	-1.34283	27.7218	7026.59	-3.00388	-3.00388	Sperm protamine P1	P1	['P1']	ARYRCCRSQSRSRYYRQRQRSRRRRRRSCQTRRRAMRCCRPRYRPRCRRH	ARYRccRSQSRSRYYRQRQRSRRRRRRScQTRRRAMRccRPRYRPRcRRH	C5(Carbamidomethyl); C6(Carbamidomethyl); C29(Carbamidomethyl); C38(Carbamidomethyl); C39(Carbamidomethyl); C47(Carbamidomethyl)	2	51	[]	[]	[]	[]	9999	92.66	PS-008	0	P|000	7029.45	-0.142464	P1	P1	Unmod	P1	P|000 → P1
B	R03	B_R03	PS	247	5307.84	12.3739	-1.51983	7.4021	7026.59	-3.00208	-3.00208	Sperm protamine P1	P1	['P1']	ARYRCCRSQSRSRYYRQRQRSRRRRRRSCQTRRRAMRCCRPRYRPRCRRH	ARYRccRSQSRSRYYRQRQRSRRRRRRScQTRRRAMRccRPRYRPRcRRH	C5(Carbamidomethyl); C6(Carbamidomethyl); C29(Carbamidomethyl); C38(Carbamidomethyl); C39(Carbamidomethyl); C47(Carbamidomethyl)	2	51	[]	[]	[]	[]	9999	49.96	PS-008	0	P|000	7029.45	-0.142464	P1	P1	Unmod	P1	P|000 → P1
B	R04	B_R04	PS	1143	16346.1	13.9967	-1.58631	32.2983	7026.6	-2.99988	-2.99988	Sperm protamine P1	P1	['P1']	ARYRCCRSQSRSRYYRQRQRSRRRRRRSCQTRRRAMRCCRPRYRPRCRRH	ARYRccRSQSRSRYYRQRQRSRRRRRRScQTRRRAMRccRPRYRPRcRRH	C5(Carbamidomethyl); C6(Carbamidomethyl); C29(Carbamidomethyl); C38(Carbamidomethyl); C39(Carbamidomethyl); C47(Carbamidomethyl)	2	51	[]	[]	[]	[]	9999	96.84	PS-008	0	P|000	7029.45	-0.142464	P1	P1	Unmod	P1	P|000 → P1
B	R03	B_R03	PS	425	60953.2	15.8954	-0.154428	12.49	7026.6	-2.99588	-2.99588	Sperm protamine P1	P1	['P1']	ARYRCCRSQSRSRYYRQRQRSRRRRRRSCQTRRRAMRCCRPRYRPRCRRH	ARYRccRSQSRSRYYRQRQRSRRRRRRScQTRRRAMRccRPRYRPRcRRH	C5(Carbamidomethyl); C6(Carbamidomethyl); C29(Carbamidomethyl); C38(Carbamidomethyl); C39(Carbamidomethyl); C47(Carbamidomethyl)	2	51	[]	[]	[]	[]	9999	116.74	PS-008	0	P|000	7029.45	-0.142464	P1	P1	Unmod	P1	P|000 → P1
B	R04	B_R04	PS	1067	30668.2	14.9045	-1.2289	30.0648	7026.6	-2.99528	-2.99528	Sperm protamine P1	P1	['P1']	ARYRCCRSQSRSRYYRQRQRSRRRRRRSCQTRRRAMRCCRPRYRPRCRRH	ARYRccRSQSRSRYYRQRQRSRRRRRRScQTRRRAMRccRPRYRPRcRRH	C5(Carbamidomethyl); C6(Carbamidomethyl); C29(Carbamidomethyl); C38(Carbamidomethyl); C39(Carbamidomethyl); C47(Carbamidomethyl)	2	51	[]	[]	[]	[]	9999	95.7	PS-008	0	P|000	7029.45	-0.142464	P1	P1	Unmod	P1	P|000 → P1
A	R02	A_R02	PS	325	135282	17.0456	0.242649	9.6936	7026.6	-2.99488	-2.99488	Sperm protamine P1	P1	['P1']	ARYRCCRSQSRSRYYRQRQRSRRRRRRSCQTRRRAMRCCRPRYRPRCRRH	ARYRccRSQSRSRYYRQRQRSRRRRRRScQTRRRAMRccRPRYRPRcRRH	C5(Carbamidomethyl); C6(Carbamidomethyl); C29(Carbamidomethyl); C38(Carbamidomethyl); C39(Carbamidomethyl); C47(Carbamidomethyl)	2	51	[]	[]	[]	[]	9999	136.69	PS-008	0	P|000	7029.45	-0.142464	P1	P1	Unmod	P1	P|000 → P1
A	R01	A_R01	PS	380	219193	17.7418	0.308781	11.0473	7026.6	-2.99388	-2.99388	Sperm protamine P1	P1	['P1']	ARYRCCRSQSRSRYYRQRQRSRRRRRRSCQTRRRAMRCCRPRYRPRCRRH	ARYRccRSQSRSRYYRQRQRSRRRRRRScQTRRRAMRccRPRYRPRcRRH	C5(Carbamidomethyl); C6(Carbamidomethyl); C29(Carbamidomethyl); C38(Carbamidomethyl); C39(Carbamidomethyl); C47(Carbamidomethyl)	2	51	[]	[]	[]	[]	9999	113.54	PS-008	0	P|000	7029.45	-0.142464	P1	P1	Unmod	P1	P|000 → P1
A	R02	A_R02	PS	73	2994.22	11.548	-2.03153	2.1717	7026.6	-2.99318	-2.99318	Sperm protamine P1	P1	['P1']	ARYRCCRSQSRSRYYRQRQRSRRRRRRSCQTRRRAMRCCRPRYRPRCRRH	ARYRccRSQSRSRYYRQRQRSRRRRRRScQTRRRAMRccRPRYRPRcRRH	C5(Carbamidomethyl); C6(Carbamidomethyl); C29(Carbamidomethyl); C38(Carbamidomethyl); C39(Carbamidomethyl); C47(Carbamidomethyl)	2	51	[]	[]	[]	[]	9999	27.35	PS-008	0	P|000	7029.45	-0.142464	P1	P1	Unmod	P1	P|000 → P1
B	R03	B_R03	PS	218	5841.87	12.5122	-1.4662	6.5298	7026.6	-2.99258	-2.99258	Sperm protamine P1	P1	['P1']	ARYRCCRSQSRSRYYRQRQRSRRRRRRSCQTRRRAMRCCRPRYRPRCRRH	ARYRccRSQSRSRYYRQRQRSRRRRRRScQTRRRAMRccRPRYRPRcRRH	C5(Carbamidomethyl); C6(Carbamidomethyl); C29(Carbamidomethyl); C38(Carbamidomethyl); C39(Carbamidomethyl); C47(Carbamidomethyl)	2	51	[]	[]	[]	[]	9999	32.56	PS-008	0	P|000	7029.45	-0.142464	P1	P1	Unmod	P1	P|000 → P1
B	R03	B_R03	PS	43	4907.28	12.2607	-1.56372	1.2541	7026.6	-2.99168	-2.99168	Sperm protamine P1	P1	['P1']	ARYRCCRSQSRSRYYRQRQRSRRRRRRSCQTRRRAMRCCRPRYRPRCRRH	ARYRccRSQSRSRYYRQRQRSRRRRRRScQTRRRAMRccRPRYRPRcRRH	C5(Carbamidomethyl); C6(Carbamidomethyl); C29(Carbamidomethyl); C38(Carbamidomethyl); C39(Carbamidomethyl); C47(Carbamidomethyl)	2	51	[]	[]	[]	[]	9999	61.68	PS-008	0	P|000	7029.45	-0.142464	P1	P1	Unmod	P1	P|000 → P1
B	R03	B_R03	PS	427	122897	16.9071	0.237831	12.5486	7026.61	-2.99068	-2.99068	Sperm protamine P1	P1	['P1']	ARYRCCRSQSRSRYYRQRQRSRRRRRRSCQTRRRAMRCCRPRYRPRCRRH	ARYRccRSQSRSRYYRQRQRSRRRRRRScQTRRRAMRccRPRYRPRcRRH	C5(Carbamidomethyl); C6(Carbamidomethyl); C29(Carbamidomethyl); C38(Carbamidomethyl); C39(Carbamidomethyl); C47(Carbamidomethyl)	2	51	[]	[]	[]	[]	9999	87.59	PS-008	0	P|000	7029.45	-0.142464	P1	P1	Unmod	P1	P|000 → P1
B	R03	B_R03	PS	377	132696	17.0178	0.280742	11.0867	7026.61	-2.98998	-2.98998	Sperm protamine P1	P1	['P1']	ARYRCCRSQSRSRYYRQRQRSRRRRRRSCQTRRRAMRCCRPRYRPRCRRH	ARYRccRSQSRSRYYRQRQRSRRRRRRScQTRRRAMRccRPRYRPRcRRH	C5(Carbamidomethyl); C6(Carbamidomethyl); C29(Carbamidomethyl); C38(Carbamidomethyl); C39(Carbamidomethyl); C47(Carbamidomethyl)	2	51	[]	[]	[]	[]	9999	133.77	PS-008	0	P|000	7029.45	-0.142464	P1	P1	Unmod	P1	P|000 → P1
B	R04	B_R04	PS	759	79671.6	16.2818	-0.686632	21.0885	7027.59	-2.00808	-2.00808	Sperm protamine P1	P1	['P1']	ARYRCCRSQSRSRYYRQRQRSRRRRRRSCQTRRRAMRCCRPRYRPRCRRH	ARYRccRSQSRSRYYRQRQRSRRRRRRScQTRRRAMRccRPRYRPRcRRH	C5(Carbamidomethyl); C6(Carbamidomethyl); C29(Carbamidomethyl); C38(Carbamidomethyl); C39(Carbamidomethyl); C47(Carbamidomethyl)	2	51	[]	[]	[]	[]	9999	105.76	PS-008	0	P|000	7029.45	-0.142464	P1	P1	Unmod	P1	P|000 → P1
A	R02	A_R02	TP	369	4005000000	31.8992	0.655946	10.9438	7027.59	-2.00419	-2.00419	P04553	P1	['P1']	ARYRCCRSQSRSRYYRQRQRSRRRRRRSCQTRRRAMRCCRPRYRPRCRRH	M.ARYR(C)[Carbamidomethylation](C)[Carbamidomethylation]RSQSRSRYYRQRQRSRRRRRRS((C)[Carbamidomethylation])[-2.0092]QTRRRAMR(C)[Carbamidomethylation](C)[Carbamidomethylation]RPRYRPR(C)[Carbamidomethylation]RRH.		2	51	[]	[]	[]	[]		24.9244	TP-140	0	P|000	7029.45	-0.142464	P1	P1	Unmod	P1	P|000 → P1
A	R02	A_R02	PS	1325	16099.2	13.9747	-1.02768	38.3586	7027.6	-1.99788	-1.99788	Sperm protamine P1	P1	['P1']	ARYRCCRSQSRSRYYRQRQRSRRRRRRSCQTRRRAMRCCRPRYRPRCRRH	ARYRccRSQSRSRYYRQRQRSRRRRRRScQTRRRAMRccRPRYRPRcRRH	C5(Carbamidomethyl); C6(Carbamidomethyl); C29(Carbamidomethyl); C38(Carbamidomethyl); C39(Carbamidomethyl); C47(Carbamidomethyl)	2	51	[]	[]	[]	[]	9999	67.56	PS-008	0	P|000	7029.45	-0.142464	P1	P1	Unmod	P1	P|000 → P1
B	R03	B_R03	PS	227	2739.06	11.4195	-1.8899	6.8004	7027.6	-1.99448	-1.99448	Sperm protamine P1	P1	['P1']	ARYRCCRSQSRSRYYRQRQRSRRRRRRSCQTRRRAMRCCRPRYRPRCRRH	ARYRccRSQSRSRYYRQRQRSRRRRRRScQTRRRAMRccRPRYRPRcRRH	C5(Carbamidomethyl); C6(Carbamidomethyl); C29(Carbamidomethyl); C38(Carbamidomethyl); C39(Carbamidomethyl); C47(Carbamidomethyl)	2	51	[]	[]	[]	[]	9999	55.28	PS-008	0	P|000	7029.45	-0.142464	P1	P1	Unmod	P1	P|000 → P1
A	R01	A_R01	PS	1164	25888.2	14.66	-1.13634	33.4695	7027.6	-1.99348	-1.99348	Sperm protamine P1	P1	['P1']	ARYRCCRSQSRSRYYRQRQRSRRRRRRSCQTRRRAMRCCRPRYRPRCRRH	ARYRccRSQSRSRYYRQRQRSRRRRRRScQTRRRAMRccRPRYRPRcRRH	C5(Carbamidomethyl); C6(Carbamidomethyl); C29(Carbamidomethyl); C38(Carbamidomethyl); C39(Carbamidomethyl); C47(Carbamidomethyl)	2	51	[]	[]	[]	[]	9999	79.16	PS-008	0	P|000	7029.45	-0.142464	P1	P1	Unmod	P1	P|000 → P1
B	R04	B_R04	PS	1065	20307.1	14.3097	-1.46306	30.0063	7027.6	-1.99258	-1.99258	Sperm protamine P1	P1	['P1']	ARYRCCRSQSRSRYYRQRQRSRRRRRRSCQTRRRAMRCCRPRYRPRCRRH	ARYRccRSQSRSRYYRQRQRSRRRRRRScQTRRRAMRccRPRYRPRcRRH	C5(Carbamidomethyl); C6(Carbamidomethyl); C29(Carbamidomethyl); C38(Carbamidomethyl); C39(Carbamidomethyl); C47(Carbamidomethyl)	2	51	[]	[]	[]	[]	9999	80.46	PS-008	0	P|000	7029.45	-0.142464	P1	P1	Unmod	P1	P|000 → P1
A	R01	A_R01	PS	662	131581	17.0056	-0.036458	18.8235	7027.6	-1.99238	-1.99238	Sperm protamine P1	P1	['P1']	ARYRCCRSQSRSRYYRQRQRSRRRRRRSCQTRRRAMRCCRPRYRPRCRRH	ARYRccRSQSRSRYYRQRQRSRRRRRRScQTRRRAMRccRPRYRPRcRRH	C5(Carbamidomethyl); C6(Carbamidomethyl); C29(Carbamidomethyl); C38(Carbamidomethyl); C39(Carbamidomethyl); C47(Carbamidomethyl)	2	51	[]	[]	[]	[]	9999	107.91	PS-008	0	P|000	7029.45	-0.142464	P1	P1	Unmod	P1	P|000 → P1
B	R04	B_R04	TP	1265	709800000	29.4028	-0.571492	35.8638	7027.6	-1.9913	-1.9913	P04553	P1	['P1']	ARYRCCRSQSRSRYYRQRQRSRRRRRRSCQTRRRAMRCCRPRYRPRCRRH	M.ARYR(C)[Carbamidomethylation](C)[Carbamidomethylation]RSQSRSRYYRQRQRSRRRR(R)[-1.7813]RS(C)[Carbamidomethylation]QTRRRAMR(C)[Carbamidomethylation](C)[Carbamidomethylation]RPRYRPR(C)[Carbamidomethylation]RRH.		2	51	[]	[]	[]	[]		29.7806	TP-140	0	P|000	7029.45	-0.142464	P1	P1	Unmod	P1	P|000 → P1
B	R04	B_R04	PS	1169	99341.8	16.6001	-0.5613	33.0573	7027.6	-1.99128	-1.99128	Sperm protamine P1	P1	['P1']	ARYRCCRSQSRSRYYRQRQRSRRRRRRSCQTRRRAMRCCRPRYRPRCRRH	ARYRccRSQSRSRYYRQRQRSRRRRRRScQTRRRAMRccRPRYRPRcRRH	C5(Carbamidomethyl); C6(Carbamidomethyl); C29(Carbamidomethyl); C38(Carbamidomethyl); C39(Carbamidomethyl); C47(Carbamidomethyl)	2	51	[]	[]	[]	[]	9999	121.11	PS-008	0	P|000	7029.45	-0.142464	P1	P1	Unmod	P1	P|000 → P1
B	R03	B_R03	PS	445	88257.8	16.4294	0.0526295	13.0726	7027.61	-1.98958	-1.98958	Sperm protamine P1	P1	['P1']	ARYRCCRSQSRSRYYRQRQRSRRRRRRSCQTRRRAMRCCRPRYRPRCRRH	ARYRccRSQSRSRYYRQRQRSRRRRRRScQTRRRAMRccRPRYRPRcRRH	C5(Carbamidomethyl); C6(Carbamidomethyl); C29(Carbamidomethyl); C38(Carbamidomethyl); C39(Carbamidomethyl); C47(Carbamidomethyl)	2	51	[]	[]	[]	[]	9999	93.11	PS-008	0	P|000	7029.45	-0.142464	P1	P1	Unmod	P1	P|000 → P1
A	R02	A_R02	TP	783	4005000000	31.8992	0.655946	22.5882	7027.61	-1.98834	-1.98834	P04553	P1	['P1']	ARYRCCRSQSRSRYYRQRQRSRRRRRRSCQTRRRAMRCCRPRYRPRCRRH	M.ARYR(C)[Carbamidomethylation](C)[Carbamidomethylation]RSQSRSRYYRQRQRSRRRRRRS((C)[Carbamidomethylation])[-1.7784]QTRRRAMR(C)[Carbamidomethylation](C)[Carbamidomethylation]RPRYRPR(C)[Carbamidomethylation]RRH.		2	51	[]	[]	[]	[]		23.5317	TP-140	0	P|000	7029.45	-0.142464	P1	P1	Unmod	P1	P|000 → P1
A	R01	A_R01	PS	1214	20943.2	14.3542	-1.27974	34.92	7027.61	-1.98168	-1.98168	Sperm protamine P1	P1	['P1']	ARYRCCRSQSRSRYYRQRQRSRRRRRRSCQTRRRAMRCCRPRYRPRCRRH	ARYRccRSQSRSRYYRQRQRSRRRRRRScQTRRRAMRccRPRYRPRcRRH	C5(Carbamidomethyl); C6(Carbamidomethyl); C29(Carbamidomethyl); C38(Carbamidomethyl); C39(Carbamidomethyl); C47(Carbamidomethyl)	2	51	[]	[]	[]	[]	9999	85.55	PS-008	0	P|000	7029.45	-0.142464	P1	P1	Unmod	P1	P|000 → P1
A	R01	A_R01	PS	1048	37507.7	15.1949	-0.885522	30.0971	7027.61	-1.98158	-1.98158	Sperm protamine P1	P1	['P1']	ARYRCCRSQSRSRYYRQRQRSRRRRRRSCQTRRRAMRCCRPRYRPRCRRH	ARYRccRSQSRSRYYRQRQRSRRRRRRScQTRRRAMRccRPRYRPRcRRH	C5(Carbamidomethyl); C6(Carbamidomethyl); C29(Carbamidomethyl); C38(Carbamidomethyl); C39(Carbamidomethyl); C47(Carbamidomethyl)	2	51	[]	[]	[]	[]	9999	93.38	PS-008	0	P|000	7029.45	-0.142464	P1	P1	Unmod	P1	P|000 → P1
B	R03	B_R03	PS	555	192312	17.5531	0.488305	15.9853	7027.63	-1.96498	-1.96498	Sperm protamine P1	P1	['P1']	ARYRCCRSQSRSRYYRQRQRSRRRRRRSCQTRRRAMRCCRPRYRPRCRRH	ARYRccRSQSRSRYYRQRQRSRRRRRRScQTRRRAMRccRPRYRPRcRRH	C5(Carbamidomethyl); C6(Carbamidomethyl); C29(Carbamidomethyl); C38(Carbamidomethyl); C39(Carbamidomethyl); C47(Carbamidomethyl)	2	51	[]	[]	[]	[]	9999	115.21	PS-008	0	P|000	7029.45	-0.142464	P1	P1	Unmod	P1	P|000 → P1
B	R03	B_R03	PS	447	806718	19.6217	1.29038	13.1312	7028.57	-1.02808	-1.02808	Sperm protamine P1	P1	['P1']	ARYRCCRSQSRSRYYRQRQRSRRRRRRSCQTRRRAMRCCRPRYRPRCRRH	ARYRccRSQSRSRYYRQRQRSRRRRRRScQTRRRAMRccRPRYRPRcRRH	C5(Carbamidomethyl); C6(Carbamidomethyl); C29(Carbamidomethyl); C38(Carbamidomethyl); C39(Carbamidomethyl); C47(Carbamidomethyl)	2	51	[]	[]	[]	[]	9999	106.01	PS-008	0	P|000	7029.45	-0.142464	P1	P1	Unmod	P1	P|000 → P1
A	R02	A_R02	PS	63	24677.2	14.5909	-0.772781	1.8689	7028.57	-1.02768	-1.02768	Sperm protamine P1	P1	['P1']	ARYRCCRSQSRSRYYRQRQRSRRRRRRSCQTRRRAMRCCRPRYRPRCRRH	ARYRccRSQSRSRYYRQRQRSRRRRRRScQTRRRAMRccRPRYRPRcRRH	C5(Carbamidomethyl); C6(Carbamidomethyl); C29(Carbamidomethyl); C38(Carbamidomethyl); C39(Carbamidomethyl); C47(Carbamidomethyl)	2	51	[]	[]	[]	[]	9999	50.96	PS-008	0	P|000	7029.45	-0.142464	P1	P1	Unmod	P1	P|000 → P1
A	R02	A_R02	PS	805	76771	16.2283	-0.0954537	23.2344	7028.57	-1.02748	-1.02748	Sperm protamine P1	P1	['P1']	ARYRCCRSQSRSRYYRQRQRSRRRRRRSCQTRRRAMRCCRPRYRPRCRRH	ARYRccRSQSRSRYYRQRQRSRRRRRRScQTRRRAMRccRPRYRPRcRRH	C5(Carbamidomethyl); C6(Carbamidomethyl); C29(Carbamidomethyl); C38(Carbamidomethyl); C39(Carbamidomethyl); C47(Carbamidomethyl)	2	51	[]	[]	[]	[]	9999	93.17	PS-008	0	P|000	7029.45	-0.142464	P1	P1	Unmod	P1	P|000 → P1
A	R02	A_R02	PS	413	147500	17.1704	0.294254	12.2297	7028.57	-1.02458	-1.02458	Sperm protamine P1	P1	['P1']	ARYRCCRSQSRSRYYRQRQRSRRRRRRSCQTRRRAMRCCRPRYRPRCRRH	ARYRccRSQSRSRYYRQRQRSRRRRRRScQTRRRAMRccRPRYRPRcRRH	C5(Carbamidomethyl); C6(Carbamidomethyl); C29(Carbamidomethyl); C38(Carbamidomethyl); C39(Carbamidomethyl); C47(Carbamidomethyl)	2	51	[]	[]	[]	[]	9999	119.51	PS-008	0	P|000	7029.45	-0.142464	P1	P1	Unmod	P1	P|000 → P1
B	R03	B_R03	PS	291	1.21675e+06	20.2146	1.52026	8.6734	7028.57	-1.02078	-1.02078	Sperm protamine P1	P1	['P1']	ARYRCCRSQSRSRYYRQRQRSRRRRRRSCQTRRRAMRCCRPRYRPRCRRH	ARYRccRSQSRSRYYRQRQRSRRRRRRScQTRRRAMRccRPRYRPRcRRH	C5(Carbamidomethyl); C6(Carbamidomethyl); C29(Carbamidomethyl); C38(Carbamidomethyl); C39(Carbamidomethyl); C47(Carbamidomethyl)	2	51	[]	[]	[]	[]	9999	81.17	PS-008	0	P|000	7029.45	-0.142464	P1	P1	Unmod	P1	P|000 → P1
B	R03	B_R03	PS	437	493328	18.9122	1.01527	12.8389	7028.58	-1.02028	-1.02028	Sperm protamine P1	P1	['P1']	ARYRCCRSQSRSRYYRQRQRSRRRRRRSCQTRRRAMRCCRPRYRPRCRRH	ARYRccRSQSRSRYYRQRQRSRRRRRRScQTRRRAMRccRPRYRPRcRRH	C5(Carbamidomethyl); C6(Carbamidomethyl); C29(Carbamidomethyl); C38(Carbamidomethyl); C39(Carbamidomethyl); C47(Carbamidomethyl)	2	51	[]	[]	[]	[]	9999	113.73	PS-008	0	P|000	7029.45	-0.142464	P1	P1	Unmod	P1	P|000 → P1
B	R03	B_R03	PS	379	519165	18.9858	1.04383	11.1453	7028.58	-1.01968	-1.01968	Sperm protamine P1	P1	['P1']	ARYRCCRSQSRSRYYRQRQRSRRRRRRSCQTRRRAMRCCRPRYRPRCRRH	ARYRccRSQSRSRYYRQRQRSRRRRRRScQTRRRAMRccRPRYRPRcRRH	C5(Carbamidomethyl); C6(Carbamidomethyl); C29(Carbamidomethyl); C38(Carbamidomethyl); C39(Carbamidomethyl); C47(Carbamidomethyl)	2	51	[]	[]	[]	[]	9999	110.48	PS-008	0	P|000	7029.45	-0.142464	P1	P1	Unmod	P1	P|000 → P1
A	R02	A_R02	PS	347	574385	19.1317	1.10557	10.3165	7028.58	-1.01868	-1.01868	Sperm protamine P1	P1	['P1']	ARYRCCRSQSRSRYYRQRQRSRRRRRRSCQTRRRAMRCCRPRYRPRCRRH	ARYRccRSQSRSRYYRQRQRSRRRRRRScQTRRRAMRccRPRYRPRcRRH	C5(Carbamidomethyl); C6(Carbamidomethyl); C29(Carbamidomethyl); C38(Carbamidomethyl); C39(Carbamidomethyl); C47(Carbamidomethyl)	2	51	[]	[]	[]	[]	9999	129.64	PS-008	0	P|000	7029.45	-0.142464	P1	P1	Unmod	P1	P|000 → P1
A	R02	A_R02	PS	357	492997	18.9112	1.01438	10.6113	7028.58	-1.01568	-1.01568	Sperm protamine P1	P1	['P1']	ARYRCCRSQSRSRYYRQRQRSRRRRRRSCQTRRRAMRCCRPRYRPRCRRH	ARYRccRSQSRSRYYRQRQRSRRRRRRScQTRRRAMRccRPRYRPRcRRH	C5(Carbamidomethyl); C6(Carbamidomethyl); C29(Carbamidomethyl); C38(Carbamidomethyl); C39(Carbamidomethyl); C47(Carbamidomethyl)	2	51	[]	[]	[]	[]	9999	124.9	PS-008	0	P|000	7029.45	-0.142464	P1	P1	Unmod	P1	P|000 → P1
A	R02	A_R02	PS	134	23296.5	14.5078	-0.807141	4.0189	7028.58	-1.01418	-1.01418	Sperm protamine P1	P1	['P1']	ARYRCCRSQSRSRYYRQRQRSRRRRRRSCQTRRRAMRCCRPRYRPRCRRH	ARYRccRSQSRSRYYRQRQRSRRRRRRScQTRRRAMRccRPRYRPRcRRH	C5(Carbamidomethyl); C6(Carbamidomethyl); C29(Carbamidomethyl); C38(Carbamidomethyl); C39(Carbamidomethyl); C47(Carbamidomethyl)	2	51	[]	[]	[]	[]	9999	71.58	PS-008	0	P|000	7029.45	-0.142464	P1	P1	Unmod	P1	P|000 → P1
B	R03	B_R03	PS	205	21068.5	14.3628	-0.748672	6.1381	7028.58	-1.01188	-1.01188	Sperm protamine P1	P1	['P1']	ARYRCCRSQSRSRYYRQRQRSRRRRRRSCQTRRRAMRCCRPRYRPRCRRH	ARYRccRSQSRSRYYRQRQRSRRRRRRScQTRRRAMRccRPRYRPRcRRH	C5(Carbamidomethyl); C6(Carbamidomethyl); C29(Carbamidomethyl); C38(Carbamidomethyl); C39(Carbamidomethyl); C47(Carbamidomethyl)	2	51	[]	[]	[]	[]	9999	63.25	PS-008	0	P|000	7029.45	-0.142464	P1	P1	Unmod	P1	P|000 → P1
A	R01	A_R01	PS	364	485111	18.888	0.846214	10.5867	7028.58	-1.01108	-1.01108	Sperm protamine P1	P1	['P1']	ARYRCCRSQSRSRYYRQRQRSRRRRRRSCQTRRRAMRCCRPRYRPRCRRH	ARYRccRSQSRSRYYRQRQRSRRRRRRScQTRRRAMRccRPRYRPRcRRH	C5(Carbamidomethyl); C6(Carbamidomethyl); C29(Carbamidomethyl); C38(Carbamidomethyl); C39(Carbamidomethyl); C47(Carbamidomethyl)	2	51	[]	[]	[]	[]	9999	119.92	PS-008	0	P|000	7029.45	-0.142464	P1	P1	Unmod	P1	P|000 → P1
B	R04	B_R04	PS	1149	114597	16.8062	-0.480157	32.4738	7028.59	-1.00988	-1.00988	Sperm protamine P1	P1	['P1']	ARYRCCRSQSRSRYYRQRQRSRRRRRRSCQTRRRAMRCCRPRYRPRCRRH	ARYRccRSQSRSRYYRQRQRSRRRRRRScQTRRRAMRccRPRYRPRcRRH	C5(Carbamidomethyl); C6(Carbamidomethyl); C29(Carbamidomethyl); C38(Carbamidomethyl); C39(Carbamidomethyl); C47(Carbamidomethyl)	2	51	[]	[]	[]	[]	9999	117.36	PS-008	0	P|000	7029.45	-0.142464	P1	P1	Unmod	P1	P|000 → P1
A	R02	A_R02	PS	297	401533	18.6152	0.891916	8.8989	7028.59	-1.00778	-1.00778	Sperm protamine P1	P1	['P1']	ARYRCCRSQSRSRYYRQRQRSRRRRRRSCQTRRRAMRCCRPRYRPRCRRH	ARYRccRSQSRSRYYRQRQRSRRRRRRScQTRRRAMRccRPRYRPRcRRH	C5(Carbamidomethyl); C6(Carbamidomethyl); C29(Carbamidomethyl); C38(Carbamidomethyl); C39(Carbamidomethyl); C47(Carbamidomethyl)	2	51	[]	[]	[]	[]	9999	106.5	PS-008	0	P|000	7029.45	-0.142464	P1	P1	Unmod	P1	P|000 → P1
A	R02	A_R02	PS	89	16612.1	14.0199	-1.00896	2.6569	7028.59	-1.00698	-1.00698	Sperm protamine P1	P1	['P1']	ARYRCCRSQSRSRYYRQRQRSRRRRRRSCQTRRRAMRCCRPRYRPRCRRH	ARYRccRSQSRSRYYRQRQRSRRRRRRScQTRRRAMRccRPRYRPRcRRH	C5(Carbamidomethyl); C6(Carbamidomethyl); C29(Carbamidomethyl); C38(Carbamidomethyl); C39(Carbamidomethyl); C47(Carbamidomethyl)	2	51	[]	[]	[]	[]	9999	62.23	PS-008	0	P|000	7029.45	-0.142464	P1	P1	Unmod	P1	P|000 → P1
B	R03	B_R03	PS	176	29605	14.8536	-0.558391	5.2631	7028.59	-1.00678	-1.00678	Sperm protamine P1	P1	['P1']	ARYRCCRSQSRSRYYRQRQRSRRRRRRSCQTRRRAMRCCRPRYRPRCRRH	ARYRccRSQSRSRYYRQRQRSRRRRRRScQTRRRAMRccRPRYRPRcRRH	C5(Carbamidomethyl); C6(Carbamidomethyl); C29(Carbamidomethyl); C38(Carbamidomethyl); C39(Carbamidomethyl); C47(Carbamidomethyl)	2	51	[]	[]	[]	[]	9999	60.78	PS-008	0	P|000	7029.45	-0.142464	P1	P1	Unmod	P1	P|000 → P1
A	R01	A_R01	PS	322	1.09626e+06	20.0642	1.39776	9.4841	7028.59	-1.00628	-1.00628	Sperm protamine P1	P1	['P1']	ARYRCCRSQSRSRYYRQRQRSRRRRRRSCQTRRRAMRCCRPRYRPRCRRH	ARYRccRSQSRSRYYRQRQRSRRRRRRScQTRRRAMRccRPRYRPRcRRH	C5(Carbamidomethyl); C6(Carbamidomethyl); C29(Carbamidomethyl); C38(Carbamidomethyl); C39(Carbamidomethyl); C47(Carbamidomethyl)	2	51	[]	[]	[]	[]	9999	113.67	PS-008	0	P|000	7029.45	-0.142464	P1	P1	Unmod	P1	P|000 → P1
A	R02	A_R02	PS	1337	8225.18	13.0058	-1.42846	38.709	7028.59	-1.00618	-1.00618	Sperm protamine P1	P1	['P1']	ARYRCCRSQSRSRYYRQRQRSRRRRRRSCQTRRRAMRCCRPRYRPRCRRH	ARYRccRSQSRSRYYRQRQRSRRRRRRScQTRRRAMRccRPRYRPRcRRH	C5(Carbamidomethyl); C6(Carbamidomethyl); C29(Carbamidomethyl); C38(Carbamidomethyl); C39(Carbamidomethyl); C47(Carbamidomethyl)	2	51	[]	[]	[]	[]	9999	80.07	PS-008	0	P|000	7029.45	-0.142464	P1	P1	Unmod	P1	P|000 → P1
A	R02	A_R02	PS	171	20459.7	14.3205	-0.884633	5.1371	7028.59	-1.00578	-1.00578	Sperm protamine P1	P1	['P1']	ARYRCCRSQSRSRYYRQRQRSRRRRRRSCQTRRRAMRCCRPRYRPRCRRH	ARYRccRSQSRSRYYRQRQRSRRRRRRScQTRRRAMRccRPRYRPRcRRH	C5(Carbamidomethyl); C6(Carbamidomethyl); C29(Carbamidomethyl); C38(Carbamidomethyl); C39(Carbamidomethyl); C47(Carbamidomethyl)	2	51	[]	[]	[]	[]	9999	63.89	PS-008	0	P|000	7029.45	-0.142464	P1	P1	Unmod	P1	P|000 → P1
A	R02	A_R02	PS	403	231818	17.8226	0.564077	11.9384	7028.59	-1.00488	-1.00488	Sperm protamine P1	P1	['P1']	ARYRCCRSQSRSRYYRQRQRSRRRRRRSCQTRRRAMRCCRPRYRPRCRRH	ARYRccRSQSRSRYYRQRQRSRRRRRRScQTRRRAMRccRPRYRPRcRRH	C5(Carbamidomethyl); C6(Carbamidomethyl); C29(Carbamidomethyl); C38(Carbamidomethyl); C39(Carbamidomethyl); C47(Carbamidomethyl)	2	51	[]	[]	[]	[]	9999	114.83	PS-008	0	P|000	7029.45	-0.142464	P1	P1	Unmod	P1	P|000 → P1
A	R02	A_R02	PS	755	48971.3	15.5796	-0.363766	21.7712	7028.59	-1.00478	-1.00478	Sperm protamine P1	P1	['P1']	ARYRCCRSQSRSRYYRQRQRSRRRRRRSCQTRRRAMRCCRPRYRPRCRRH	ARYRccRSQSRSRYYRQRQRSRRRRRRScQTRRRAMRccRPRYRPRcRRH	C5(Carbamidomethyl); C6(Carbamidomethyl); C29(Carbamidomethyl); C38(Carbamidomethyl); C39(Carbamidomethyl); C47(Carbamidomethyl)	2	51	[]	[]	[]	[]	9999	114.22	PS-008	0	P|000	7029.45	-0.142464	P1	P1	Unmod	P1	P|000 → P1
A	R01	A_R01	PS	366	970677	19.8886	1.31545	10.6448	7028.59	-1.00338	-1.00338	Sperm protamine P1	P1	['P1']	ARYRCCRSQSRSRYYRQRQRSRRRRRRSCQTRRRAMRCCRPRYRPRCRRH	ARYRccRSQSRSRYYRQRQRSRRRRRRScQTRRRAMRccRPRYRPRcRRH	C5(Carbamidomethyl); C6(Carbamidomethyl); C29(Carbamidomethyl); C38(Carbamidomethyl); C39(Carbamidomethyl); C47(Carbamidomethyl)	2	51	[]	[]	[]	[]	9999	118.74	PS-008	0	P|000	7029.45	-0.142464	P1	P1	Unmod	P1	P|000 → P1
A	R02	A_R02	PS	343	1.68024e+06	20.6802	1.74616	10.2095	7028.59	-1.00338	-1.00338	Sperm protamine P1	P1	['P1']	ARYRCCRSQSRSRYYRQRQRSRRRRRRSCQTRRRAMRCCRPRYRPRCRRH	ARYRccRSQSRSRYYRQRQRSRRRRRRScQTRRRAMRccRPRYRPRcRRH	C5(Carbamidomethyl); C6(Carbamidomethyl); C29(Carbamidomethyl); C38(Carbamidomethyl); C39(Carbamidomethyl); C47(Carbamidomethyl)	2	51	[]	[]	[]	[]	9999	141.47	PS-008	0	P|000	7029.45	-0.142464	P1	P1	Unmod	P1	P|000 → P1
A	R02	A_R02	PS	425	608858	19.2157	1.14036	12.5805	7028.59	-1.00298	-1.00298	Sperm protamine P1	P1	['P1']	ARYRCCRSQSRSRYYRQRQRSRRRRRRSCQTRRRAMRCCRPRYRPRCRRH	ARYRccRSQSRSRYYRQRQRSRRRRRRScQTRRRAMRccRPRYRPRcRRH	C5(Carbamidomethyl); C6(Carbamidomethyl); C29(Carbamidomethyl); C38(Carbamidomethyl); C39(Carbamidomethyl); C47(Carbamidomethyl)	2	51	[]	[]	[]	[]	9999	131.58	PS-008	0	P|000	7029.45	-0.142464	P1	P1	Unmod	P1	P|000 → P1
A	R02	A_R02	PS	283	390338	18.5744	0.87504	8.4922	7028.59	-1.00298	-1.00298	Sperm protamine P1	P1	['P1']	ARYRCCRSQSRSRYYRQRQRSRRRRRRSCQTRRRAMRCCRPRYRPRCRRH	ARYRccRSQSRSRYYRQRQRSRRRRRRScQTRRRAMRccRPRYRPRcRRH	C5(Carbamidomethyl); C6(Carbamidomethyl); C29(Carbamidomethyl); C38(Carbamidomethyl); C39(Carbamidomethyl); C47(Carbamidomethyl)	2	51	[]	[]	[]	[]	9999	113.48	PS-008	0	P|000	7029.45	-0.142464	P1	P1	Unmod	P1	P|000 → P1
B	R04	B_R04	PS	987	62144.3	15.9233	-0.827755	27.7218	7028.59	-1.00298	-1.00298	Sperm protamine P1	P1	['P1']	ARYRCCRSQSRSRYYRQRQRSRRRRRRSCQTRRRAMRCCRPRYRPRCRRH	ARYRccRSQSRSRYYRQRQRSRRRRRRScQTRRRAMRccRPRYRPRcRRH	C5(Carbamidomethyl); C6(Carbamidomethyl); C29(Carbamidomethyl); C38(Carbamidomethyl); C39(Carbamidomethyl); C47(Carbamidomethyl)	2	51	[]	[]	[]	[]	9999	92.66	PS-008	0	P|000	7029.45	-0.142464	P1	P1	Unmod	P1	P|000 → P1
B	R03	B_R03	PS	367	1.84849e+06	20.8179	1.75418	10.8017	7028.59	-1.00258	-1.00258	Sperm protamine P1	P1	['P1']	ARYRCCRSQSRSRYYRQRQRSRRRRRRSCQTRRRAMRCCRPRYRPRCRRH	ARYRccRSQSRSRYYRQRQRSRRRRRRScQTRRRAMRccRPRYRPRcRRH	C5(Carbamidomethyl); C6(Carbamidomethyl); C29(Carbamidomethyl); C38(Carbamidomethyl); C39(Carbamidomethyl); C47(Carbamidomethyl)	2	51	[]	[]	[]	[]	9999	128.77	PS-008	0	P|000	7029.45	-0.142464	P1	P1	Unmod	P1	P|000 → P1
A	R02	A_R02	PS	445	388909	18.5691	0.872852	13.1631	7028.59	-1.00258	-1.00258	Sperm protamine P1	P1	['P1']	ARYRCCRSQSRSRYYRQRQRSRRRRRRSCQTRRRAMRCCRPRYRPRCRRH	ARYRccRSQSRSRYYRQRQRSRRRRRRScQTRRRAMRccRPRYRPRcRRH	C5(Carbamidomethyl); C6(Carbamidomethyl); C29(Carbamidomethyl); C38(Carbamidomethyl); C39(Carbamidomethyl); C47(Carbamidomethyl)	2	51	[]	[]	[]	[]	9999	115.73	PS-008	0	P|000	7029.45	-0.142464	P1	P1	Unmod	P1	P|000 → P1
B	R03	B_R03	PS	115	22672.5	14.4687	-0.707628	3.4221	7028.59	-1.00238	-1.00238	Sperm protamine P1	P1	['P1']	ARYRCCRSQSRSRYYRQRQRSRRRRRRSCQTRRRAMRCCRPRYRPRCRRH	ARYRccRSQSRSRYYRQRQRSRRRRRRScQTRRRAMRccRPRYRPRcRRH	C5(Carbamidomethyl); C6(Carbamidomethyl); C29(Carbamidomethyl); C38(Carbamidomethyl); C39(Carbamidomethyl); C47(Carbamidomethyl)	2	51	[]	[]	[]	[]	9999	55.8	PS-008	0	P|000	7029.45	-0.142464	P1	P1	Unmod	P1	P|000 → P1
B	R03	B_R03	PS	333	2.1953e+06	21.066	1.85037	9.8732	7028.59	-1.00218	-1.00218	Sperm protamine P1	P1	['P1']	ARYRCCRSQSRSRYYRQRQRSRRRRRRSCQTRRRAMRCCRPRYRPRCRRH	ARYRccRSQSRSRYYRQRQRSRRRRRRScQTRRRAMRccRPRYRPRcRRH	C5(Carbamidomethyl); C6(Carbamidomethyl); C29(Carbamidomethyl); C38(Carbamidomethyl); C39(Carbamidomethyl); C47(Carbamidomethyl)	2	51	[]	[]	[]	[]	9999	133.49	PS-008	0	P|000	7029.45	-0.142464	P1	P1	Unmod	P1	P|000 → P1
B	R03	B_R03	TP	311	5713000000	32.4116	0.938315	9.25217	7028.59	-1.00148	-1.00148	P04553	P1	['P1']	ARYRCCRSQSRSRYYRQRQRSRRRRRRSCQTRRRAMRCCRPRYRPRCRRH	M.ARYR(C)[Carbamidomethylation](C)[Carbamidomethylation]RSQSRSRYYRQRQRSRRRRRRS(C)[Carbamidomethylation]QTRRRAMR(C)[Carbamidomethylation](C)[Carbamidomethylation]RPRYRPR(C)[Carbamidomethylation]RRH.		2	51	[]	[]	[]	[]		44.5181	TP-071	0	P|000	7029.45	-0.142464	P1	P1	Unmod	P1	P|000 → P1
A	R01	A_R01	PS	780	113425	16.7914	-0.136908	22.2867	7028.6	-1.00068	-1.00068	Sperm protamine P1	P1	['P1']	ARYRCCRSQSRSRYYRQRQRSRRRRRRSCQTRRRAMRCCRPRYRPRCRRH	ARYRccRSQSRSRYYRQRQRSRRRRRRScQTRRRAMRccRPRYRPRcRRH	C5(Carbamidomethyl); C6(Carbamidomethyl); C29(Carbamidomethyl); C38(Carbamidomethyl); C39(Carbamidomethyl); C47(Carbamidomethyl)	2	51	[]	[]	[]	[]	9999	95.96	PS-008	0	P|000	7029.45	-0.142464	P1	P1	Unmod	P1	P|000 → P1
B	R03	B_R03	PS	21	19041.6	14.2169	-0.805254	0.6016	7028.6	-1.00058	-1.00058	Sperm protamine P1	P1	['P1']	ARYRCCRSQSRSRYYRQRQRSRRRRRRSCQTRRRAMRCCRPRYRPRCRRH	ARYRccRSQSRSRYYRQRQRSRRRRRRScQTRRRAMRccRPRYRPRcRRH	C5(Carbamidomethyl); C6(Carbamidomethyl); C29(Carbamidomethyl); C38(Carbamidomethyl); C39(Carbamidomethyl); C47(Carbamidomethyl)	2	51	[]	[]	[]	[]	9999	66.79	PS-008	0	P|000	7029.45	-0.142464	P1	P1	Unmod	P1	P|000 → P1
B	R03	B_R03	PS	387	1.16745e+06	20.1549	1.49713	11.3817	7028.6	-1.00058	-1.00058	Sperm protamine P1	P1	['P1']	ARYRCCRSQSRSRYYRQRQRSRRRRRRSCQTRRRAMRCCRPRYRPRCRRH	ARYRccRSQSRSRYYRQRQRSRRRRRRScQTRRRAMRccRPRYRPRcRRH	C5(Carbamidomethyl); C6(Carbamidomethyl); C29(Carbamidomethyl); C38(Carbamidomethyl); C39(Carbamidomethyl); C47(Carbamidomethyl)	2	51	[]	[]	[]	[]	9999	114.29	PS-008	0	P|000	7029.45	-0.142464	P1	P1	Unmod	P1	P|000 → P1
A	R02	A_R02	PS	239	4837.04	12.2399	-1.7453	7.1941	7028.6	-0.999681	-0.999681	Sperm protamine P1	P1	['P1']	ARYRCCRSQSRSRYYRQRQRSRRRRRRSCQTRRRAMRCCRPRYRPRCRRH	ARYRccRSQSRSRYYRQRQRSRRRRRRScQTRRRAMRccRPRYRPRcRRH	C5(Carbamidomethyl); C6(Carbamidomethyl); C29(Carbamidomethyl); C38(Carbamidomethyl); C39(Carbamidomethyl); C47(Carbamidomethyl)	2	51	[]	[]	[]	[]	9999	22.77	PS-008	0	P|000	7029.45	-0.142464	P1	P1	Unmod	P1	P|000 → P1
B	R03	B_R03	PS	353	378994	18.5318	0.86779	10.4255	7028.6	-0.999481	-0.999481	Sperm protamine P1	P1	['P1']	ARYRCCRSQSRSRYYRQRQRSRRRRRRSCQTRRRAMRCCRPRYRPRCRRH	ARYRccRSQSRSRYYRQRQRSRRRRRRScQTRRRAMRccRPRYRPRcRRH	C5(Carbamidomethyl); C6(Carbamidomethyl); C29(Carbamidomethyl); C38(Carbamidomethyl); C39(Carbamidomethyl); C47(Carbamidomethyl)	2	51	[]	[]	[]	[]	9999	121.45	PS-008	0	P|000	7029.45	-0.142464	P1	P1	Unmod	P1	P|000 → P1
A	R01	A_R01	PS	342	796745	19.6038	1.18187	10.0083	7028.6	-0.999281	-0.999281	Sperm protamine P1	P1	['P1']	ARYRCCRSQSRSRYYRQRQRSRRRRRRSCQTRRRAMRCCRPRYRPRCRRH	ARYRccRSQSRSRYYRQRQRSRRRRRRScQTRRRAMRccRPRYRPRcRRH	C5(Carbamidomethyl); C6(Carbamidomethyl); C29(Carbamidomethyl); C38(Carbamidomethyl); C39(Carbamidomethyl); C47(Carbamidomethyl)	2	51	[]	[]	[]	[]	9999	104.44	PS-008	0	P|000	7029.45	-0.142464	P1	P1	Unmod	P1	P|000 → P1
A	R02	A_R02	TP	357	4005000000	31.8992	0.655946	10.6113	7028.6	-0.999035	-0.999035	P04553	P1	['P1']	ARYRCCRSQSRSRYYRQRQRSRRRRRRSCQTRRRAMRCCRPRYRPRCRRH	M.ARYR(C)[Carbamidomethylation](C)[Carbamidomethylation]RSQSRSRYYRQRQRSRRRRRRS(C)[Carbamidomethylation]QTRRRAMR(C)[Carbamidomethylation](C)[Carbamidomethylation]RPRYRPR(C)[Carbamidomethylation]RRH.		2	51	[]	[]	[]	[]		42.9308	TP-071	0	P|000	7029.45	-0.142464	P1	P1	Unmod	P1	P|000 → P1
A	R02	A_R02	PS	405	658982	19.3299	1.18757	11.9967	7028.6	-0.998881	-0.998881	Sperm protamine P1	P1	['P1']	ARYRCCRSQSRSRYYRQRQRSRRRRRRSCQTRRRAMRCCRPRYRPRCRRH	ARYRccRSQSRSRYYRQRQRSRRRRRRScQTRRRAMRccRPRYRPRcRRH	C5(Carbamidomethyl); C6(Carbamidomethyl); C29(Carbamidomethyl); C38(Carbamidomethyl); C39(Carbamidomethyl); C47(Carbamidomethyl)	2	51	[]	[]	[]	[]	9999	141.73	PS-008	0	P|000	7029.45	-0.142464	P1	P1	Unmod	P1	P|000 → P1
B	R04	B_R04	PS	1229	135322	17.046	-0.385732	34.8131	7028.6	-0.998881	-0.998881	Sperm protamine P1	P1	['P1']	ARYRCCRSQSRSRYYRQRQRSRRRRRRSCQTRRRAMRCCRPRYRPRCRRH	ARYRccRSQSRSRYYRQRQRSRRRRRRScQTRRRAMRccRPRYRPRcRRH	C5(Carbamidomethyl); C6(Carbamidomethyl); C29(Carbamidomethyl); C38(Carbamidomethyl); C39(Carbamidomethyl); C47(Carbamidomethyl)	2	51	[]	[]	[]	[]	9999	108.1	PS-008	0	P|000	7029.45	-0.142464	P1	P1	Unmod	P1	P|000 → P1
B	R03	B_R03	TP	143	5713000000	32.4116	0.938315	4.26667	7028.6	-0.998415	-0.998415	P04553	P1	['P1']	ARYRCCRSQSRSRYYRQRQRSRRRRRRSCQTRRRAMRCCRPRYRPRCRRH	M.ARYR(C)[Carbamidomethylation](C)[Carbamidomethylation]RSQSRSRYYRQRQRSRRRRRRS(C)[Carbamidomethylation]QTRRRAMR(C)[Carbamidomethylation](C)[Carbamidomethylation]RPRYRPR(C)[Carbamidomethylation]RRH.		2	51	[]	[]	[]	[]		33.8805	TP-071	0	P|000	7029.45	-0.142464	P1	P1	Unmod	P1	P|000 → P1
A	R01	A_R01	PS	1334	42015.1	15.3586	-0.808751	38.4126	7028.6	-0.998381	-0.998381	Sperm protamine P1	P1	['P1']	ARYRCCRSQSRSRYYRQRQRSRRRRRRSCQTRRRAMRCCRPRYRPRCRRH	ARYRccRSQSRSRYYRQRQRSRRRRRRScQTRRRAMRccRPRYRPRcRRH	C5(Carbamidomethyl); C6(Carbamidomethyl); C29(Carbamidomethyl); C38(Carbamidomethyl); C39(Carbamidomethyl); C47(Carbamidomethyl)	2	51	[]	[]	[]	[]	9999	72.88	PS-008	0	P|000	7029.45	-0.142464	P1	P1	Unmod	P1	P|000 → P1
A	R01	A_R01	PS	758	92052.8	16.4902	-0.278146	21.6391	7028.6	-0.998081	-0.998081	Sperm protamine P1	P1	['P1']	ARYRCCRSQSRSRYYRQRQRSRRRRRRSCQTRRRAMRCCRPRYRPRCRRH	ARYRccRSQSRSRYYRQRQRSRRRRRRScQTRRRAMRccRPRYRPRcRRH	C5(Carbamidomethyl); C6(Carbamidomethyl); C29(Carbamidomethyl); C38(Carbamidomethyl); C39(Carbamidomethyl); C47(Carbamidomethyl)	2	51	[]	[]	[]	[]	9999	106.91	PS-008	0	P|000	7029.45	-0.142464	P1	P1	Unmod	P1	P|000 → P1
B	R03	B_R03	PS	311	1.6853e+06	20.6846	1.70248	9.2522	7028.6	-0.998081	-0.998081	Sperm protamine P1	P1	['P1']	ARYRCCRSQSRSRYYRQRQRSRRRRRRSCQTRRRAMRCCRPRYRPRCRRH	ARYRccRSQSRSRYYRQRQRSRRRRRRScQTRRRAMRccRPRYRPRcRRH	C5(Carbamidomethyl); C6(Carbamidomethyl); C29(Carbamidomethyl); C38(Carbamidomethyl); C39(Carbamidomethyl); C47(Carbamidomethyl)	2	51	[]	[]	[]	[]	9999	125.82	PS-008	0	P|000	7029.45	-0.142464	P1	P1	Unmod	P1	P|000 → P1
A	R01	A_R01	PS	402	874622	19.7383	1.24495	11.6607	7028.6	-0.996681	-0.996681	Sperm protamine P1	P1	['P1']	ARYRCCRSQSRSRYYRQRQRSRRRRRRSCQTRRRAMRCCRPRYRPRCRRH	ARYRccRSQSRSRYYRQRQRSRRRRRRScQTRRRAMRccRPRYRPRcRRH	C5(Carbamidomethyl); C6(Carbamidomethyl); C29(Carbamidomethyl); C38(Carbamidomethyl); C39(Carbamidomethyl); C47(Carbamidomethyl)	2	51	[]	[]	[]	[]	9999	110.56	PS-008	0	P|000	7029.45	-0.142464	P1	P1	Unmod	P1	P|000 → P1
A	R01	A_R01	PS	406	264295	18.0118	0.435366	11.7623	7028.6	-0.996481	-0.996481	Sperm protamine P1	P1	['P1']	ARYRCCRSQSRSRYYRQRQRSRRRRRRSCQTRRRAMRCCRPRYRPRCRRH	ARYRccRSQSRSRYYRQRQRSRRRRRRScQTRRRAMRccRPRYRPRcRRH	C5(Carbamidomethyl); C6(Carbamidomethyl); C29(Carbamidomethyl); C38(Carbamidomethyl); C39(Carbamidomethyl); C47(Carbamidomethyl)	2	51	[]	[]	[]	[]	9999	91.34	PS-008	0	P|000	7029.45	-0.142464	P1	P1	Unmod	P1	P|000 → P1
A	R02	A_R02	PS	839	59300.5	15.8558	-0.24955	24.2232	7028.6	-0.996381	-0.996381	Sperm protamine P1	P1	['P1']	ARYRCCRSQSRSRYYRQRQRSRRRRRRSCQTRRRAMRCCRPRYRPRCRRH	ARYRccRSQSRSRYYRQRQRSRRRRRRScQTRRRAMRccRPRYRPRcRRH	C5(Carbamidomethyl); C6(Carbamidomethyl); C29(Carbamidomethyl); C38(Carbamidomethyl); C39(Carbamidomethyl); C47(Carbamidomethyl)	2	51	[]	[]	[]	[]	9999	94.86	PS-008	0	P|000	7029.45	-0.142464	P1	P1	Unmod	P1	P|000 → P1
A	R02	A_R02	TP	89	4005000000	31.8992	0.655946	2.657	7028.6	-0.996115	-0.996115	P04553	P1	['P1']	ARYRCCRSQSRSRYYRQRQRSRRRRRRSCQTRRRAMRCCRPRYRPRCRRH	M.ARYR(C)[Carbamidomethylation](C)[Carbamidomethylation]RSQSRSRYYRQRQRSRRRRRRS(C)[Carbamidomethylation]QTRRRAMR(C)[Carbamidomethylation](C)[Carbamidomethylation]RPRYRPR(C)[Carbamidomethylation]RRH.		2	51	[]	[]	[]	[]		29.891	TP-071	0	P|000	7029.45	-0.142464	P1	P1	Unmod	P1	P|000 → P1
A	R02	A_R02	PS	329	491721	18.9075	1.01284	9.8101	7028.6	-0.996081	-0.996081	Sperm protamine P1	P1	['P1']	ARYRCCRSQSRSRYYRQRQRSRRRRRRSCQTRRRAMRCCRPRYRPRCRRH	ARYRccRSQSRSRYYRQRQRSRRRRRRScQTRRRAMRccRPRYRPRcRRH	C5(Carbamidomethyl); C6(Carbamidomethyl); C29(Carbamidomethyl); C38(Carbamidomethyl); C39(Carbamidomethyl); C47(Carbamidomethyl)	2	51	[]	[]	[]	[]	9999	120.55	PS-008	0	P|000	7029.45	-0.142464	P1	P1	Unmod	P1	P|000 → P1
A	R02	A_R02	PS	387	821827	19.6485	1.31936	11.4679	7028.6	-0.995781	-0.995781	Sperm protamine P1	P1	['P1']	ARYRCCRSQSRSRYYRQRQRSRRRRRRSCQTRRRAMRCCRPRYRPRCRRH	ARYRccRSQSRSRYYRQRQRSRRRRRRScQTRRRAMRccRPRYRPRcRRH	C5(Carbamidomethyl); C6(Carbamidomethyl); C29(Carbamidomethyl); C38(Carbamidomethyl); C39(Carbamidomethyl); C47(Carbamidomethyl)	2	51	[]	[]	[]	[]	9999	134.78	PS-008	0	P|000	7029.45	-0.142464	P1	P1	Unmod	P1	P|000 → P1
A	R02	A_R02	TP	83	4005000000	31.8992	0.655946	2.47483	7028.6	-0.995555	-0.995555	P04553	P1	['P1']	ARYRCCRSQSRSRYYRQRQRSRRRRRRSCQTRRRAMRCCRPRYRPRCRRH	M.ARYR(C)[Carbamidomethylation](C)[Carbamidomethylation]RSQSRSRYYRQRQRSRRRRRRS(C)[Carbamidomethylation]QTRRRAMR(C)[Carbamidomethylation](C)[Carbamidomethylation]RPRYRPR(C)[Carbamidomethylation]RRH.		2	51	[]	[]	[]	[]		24.7396	TP-071	0	P|000	7029.45	-0.142464	P1	P1	Unmod	P1	P|000 → P1
A	R02	A_R02	PS	385	822298	19.6493	1.3197	11.4107	7028.6	-0.995481	-0.995481	Sperm protamine P1	P1	['P1']	ARYRCCRSQSRSRYYRQRQRSRRRRRRSCQTRRRAMRCCRPRYRPRCRRH	ARYRccRSQSRSRYYRQRQRSRRRRRRScQTRRRAMRccRPRYRPRcRRH	C5(Carbamidomethyl); C6(Carbamidomethyl); C29(Carbamidomethyl); C38(Carbamidomethyl); C39(Carbamidomethyl); C47(Carbamidomethyl)	2	51	[]	[]	[]	[]	9999	131.55	PS-008	0	P|000	7029.45	-0.142464	P1	P1	Unmod	P1	P|000 → P1
A	R02	A_R02	PS	213	22633.9	14.4662	-0.824362	6.4061	7028.6	-0.995281	-0.995281	Sperm protamine P1	P1	['P1']	ARYRCCRSQSRSRYYRQRQRSRRRRRRSCQTRRRAMRCCRPRYRPRCRRH	ARYRccRSQSRSRYYRQRQRSRRRRRRScQTRRRAMRccRPRYRPRcRRH	C5(Carbamidomethyl); C6(Carbamidomethyl); C29(Carbamidomethyl); C38(Carbamidomethyl); C39(Carbamidomethyl); C47(Carbamidomethyl)	2	51	[]	[]	[]	[]	9999	68.1	PS-008	0	P|000	7029.45	-0.142464	P1	P1	Unmod	P1	P|000 → P1
A	R02	A_R02	PS	301	1.37737e+06	20.3935	1.62754	9.0045	7028.6	-0.995281	-0.995281	Sperm protamine P1	P1	['P1']	ARYRCCRSQSRSRYYRQRQRSRRRRRRSCQTRRRAMRCCRPRYRPRCRRH	ARYRccRSQSRSRYYRQRQRSRRRRRRScQTRRRAMRccRPRYRPRcRRH	C5(Carbamidomethyl); C6(Carbamidomethyl); C29(Carbamidomethyl); C38(Carbamidomethyl); C39(Carbamidomethyl); C47(Carbamidomethyl)	2	51	[]	[]	[]	[]	9999	137.87	PS-008	0	P|000	7029.45	-0.142464	P1	P1	Unmod	P1	P|000 → P1
A	R01	A_R01	PS	316	2.20071e+06	21.0695	1.8692	9.3213	7028.6	-0.994481	-0.994481	Sperm protamine P1	P1	['P1']	ARYRCCRSQSRSRYYRQRQRSRRRRRRSCQTRRRAMRCCRPRYRPRCRRH	ARYRccRSQSRSRYYRQRQRSRRRRRRScQTRRRAMRccRPRYRPRcRRH	C5(Carbamidomethyl); C6(Carbamidomethyl); C29(Carbamidomethyl); C38(Carbamidomethyl); C39(Carbamidomethyl); C47(Carbamidomethyl)	2	51	[]	[]	[]	[]	9999	133.32	PS-008	0	P|000	7029.45	-0.142464	P1	P1	Unmod	P1	P|000 → P1
A	R02	A_R02	PS	173	23455	14.5176	-0.803094	5.1977	7028.6	-0.994381	-0.994381	Sperm protamine P1	P1	['P1']	ARYRCCRSQSRSRYYRQRQRSRRRRRRSCQTRRRAMRCCRPRYRPRCRRH	ARYRccRSQSRSRYYRQRQRSRRRRRRScQTRRRAMRccRPRYRPRcRRH	C5(Carbamidomethyl); C6(Carbamidomethyl); C29(Carbamidomethyl); C38(Carbamidomethyl); C39(Carbamidomethyl); C47(Carbamidomethyl)	2	51	[]	[]	[]	[]	9999	63.46	PS-008	0	P|000	7029.45	-0.142464	P1	P1	Unmod	P1	P|000 → P1
B	R03	B_R03	PS	119	7828.49	12.9345	-1.30246	3.5429	7028.6	-0.994181	-0.994181	Sperm protamine P1	P1	['P1']	ARYRCCRSQSRSRYYRQRQRSRRRRRRSCQTRRRAMRCCRPRYRPRCRRH	ARYRccRSQSRSRYYRQRQRSRRRRRRScQTRRRAMRccRPRYRPRcRRH	C5(Carbamidomethyl); C6(Carbamidomethyl); C29(Carbamidomethyl); C38(Carbamidomethyl); C39(Carbamidomethyl); C47(Carbamidomethyl)	2	51	[]	[]	[]	[]	9999	20.4	PS-008	0	P|000	7029.45	-0.142464	P1	P1	Unmod	P1	P|000 → P1
A	R02	A_R02	PS	199	2314.8	11.1767	-2.18512	5.9828	7028.6	-0.994081	-0.994081	Sperm protamine P1	P1	['P1']	ARYRCCRSQSRSRYYRQRQRSRRRRRRSCQTRRRAMRCCRPRYRPRCRRH	ARYRccRSQSRSRYYRQRQRSRRRRRRScQTRRRAMRccRPRYRPRcRRH	C5(Carbamidomethyl); C6(Carbamidomethyl); C29(Carbamidomethyl); C38(Carbamidomethyl); C39(Carbamidomethyl); C47(Carbamidomethyl)	2	51	[]	[]	[]	[]	9999	21.14	PS-008	0	P|000	7029.45	-0.142464	P1	P1	Unmod	P1	P|000 → P1
A	R01	A_R01	PS	456	243776	17.8952	0.380691	13.2212	7028.6	-0.993981	-0.993981	Sperm protamine P1	P1	['P1']	ARYRCCRSQSRSRYYRQRQRSRRRRRRSCQTRRRAMRCCRPRYRPRCRRH	ARYRccRSQSRSRYYRQRQRSRRRRRRScQTRRRAMRccRPRYRPRcRRH	C5(Carbamidomethyl); C6(Carbamidomethyl); C29(Carbamidomethyl); C38(Carbamidomethyl); C39(Carbamidomethyl); C47(Carbamidomethyl)	2	51	[]	[]	[]	[]	9999	125.03	PS-008	0	P|000	7029.45	-0.142464	P1	P1	Unmod	P1	P|000 → P1
A	R01	A_R01	PS	284	491774	18.9076	0.855442	8.4151	7028.6	-0.993881	-0.993881	Sperm protamine P1	P1	['P1']	ARYRCCRSQSRSRYYRQRQRSRRRRRRSCQTRRRAMRCCRPRYRPRCRRH	ARYRccRSQSRSRYYRQRQRSRRRRRRScQTRRRAMRccRPRYRPRcRRH	C5(Carbamidomethyl); C6(Carbamidomethyl); C29(Carbamidomethyl); C38(Carbamidomethyl); C39(Carbamidomethyl); C47(Carbamidomethyl)	2	51	[]	[]	[]	[]	9999	105.79	PS-008	0	P|000	7029.45	-0.142464	P1	P1	Unmod	P1	P|000 → P1
A	R02	A_R02	PS	191	20772.9	14.3424	-0.875565	5.7391	7028.6	-0.993581	-0.993581	Sperm protamine P1	P1	['P1']	ARYRCCRSQSRSRYYRQRQRSRRRRRRSCQTRRRAMRCCRPRYRPRCRRH	ARYRccRSQSRSRYYRQRQRSRRRRRRScQTRRRAMRccRPRYRPRcRRH	C5(Carbamidomethyl); C6(Carbamidomethyl); C29(Carbamidomethyl); C38(Carbamidomethyl); C39(Carbamidomethyl); C47(Carbamidomethyl)	2	51	[]	[]	[]	[]	9999	66.2	PS-008	0	P|000	7029.45	-0.142464	P1	P1	Unmod	P1	P|000 → P1
B	R03	B_R03	PS	401	383677	18.5495	0.874659	11.7866	7028.6	-0.993381	-0.993381	Sperm protamine P1	P1	['P1']	ARYRCCRSQSRSRYYRQRQRSRRRRRRSCQTRRRAMRCCRPRYRPRCRRH	ARYRccRSQSRSRYYRQRQRSRRRRRRScQTRRRAMRccRPRYRPRcRRH	C5(Carbamidomethyl); C6(Carbamidomethyl); C29(Carbamidomethyl); C38(Carbamidomethyl); C39(Carbamidomethyl); C47(Carbamidomethyl)	2	51	[]	[]	[]	[]	9999	118.44	PS-008	0	P|000	7029.45	-0.142464	P1	P1	Unmod	P1	P|000 → P1
A	R02	A_R02	PS	1175	47217	15.527	-0.385538	33.9926	7028.6	-0.993081	-0.993081	Sperm protamine P1	P1	['P1']	ARYRCCRSQSRSRYYRQRQRSRRRRRRSCQTRRRAMRCCRPRYRPRCRRH	ARYRccRSQSRSRYYRQRQRSRRRRRRScQTRRRAMRccRPRYRPRcRRH	C5(Carbamidomethyl); C6(Carbamidomethyl); C29(Carbamidomethyl); C38(Carbamidomethyl); C39(Carbamidomethyl); C47(Carbamidomethyl)	2	51	[]	[]	[]	[]	9999	86.42	PS-008	0	P|000	7029.45	-0.142464	P1	P1	Unmod	P1	P|000 → P1
B	R03	B_R03	PS	355	1.35397e+06	20.3688	1.58003	10.484	7028.6	-0.993081	-0.993081	Sperm protamine P1	P1	['P1']	ARYRCCRSQSRSRYYRQRQRSRRRRRRSCQTRRRAMRCCRPRYRPRCRRH	ARYRccRSQSRSRYYRQRQRSRRRRRRScQTRRRAMRccRPRYRPRcRRH	C5(Carbamidomethyl); C6(Carbamidomethyl); C29(Carbamidomethyl); C38(Carbamidomethyl); C39(Carbamidomethyl); C47(Carbamidomethyl)	2	51	[]	[]	[]	[]	9999	119.07	PS-008	0	P|000	7029.45	-0.142464	P1	P1	Unmod	P1	P|000 → P1
B	R03	B_R03	PS	763	58613	15.8389	-0.176327	21.9631	7028.6	-0.992981	-0.992981	Sperm protamine P1	P1	['P1']	ARYRCCRSQSRSRYYRQRQRSRRRRRRSCQTRRRAMRCCRPRYRPRCRRH	ARYRccRSQSRSRYYRQRQRSRRRRRRScQTRRRAMRccRPRYRPRcRRH	C5(Carbamidomethyl); C6(Carbamidomethyl); C29(Carbamidomethyl); C38(Carbamidomethyl); C39(Carbamidomethyl); C47(Carbamidomethyl)	2	51	[]	[]	[]	[]	9999	96.7	PS-008	0	P|000	7029.45	-0.142464	P1	P1	Unmod	P1	P|000 → P1
B	R04	B_R04	PS	777	162863	17.3133	-0.28051	21.6175	7028.6	-0.992481	-0.992481	Sperm protamine P1	P1	['P1']	ARYRCCRSQSRSRYYRQRQRSRRRRRRSCQTRRRAMRCCRPRYRPRCRRH	ARYRccRSQSRSRYYRQRQRSRRRRRRScQTRRRAMRccRPRYRPRcRRH	C5(Carbamidomethyl); C6(Carbamidomethyl); C29(Carbamidomethyl); C38(Carbamidomethyl); C39(Carbamidomethyl); C47(Carbamidomethyl)	2	51	[]	[]	[]	[]	9999	76.8	PS-008	0	P|000	7029.45	-0.142464	P1	P1	Unmod	P1	P|000 → P1
A	R01	A_R01	PS	336	2.60075e+06	21.3105	1.98218	9.8612	7028.6	-0.992281	-0.992281	Sperm protamine P1	P1	['P1']	ARYRCCRSQSRSRYYRQRQRSRRRRRRSCQTRRRAMRCCRPRYRPRCRRH	ARYRccRSQSRSRYYRQRQRSRRRRRRScQTRRRAMRccRPRYRPRcRRH	C5(Carbamidomethyl); C6(Carbamidomethyl); C29(Carbamidomethyl); C38(Carbamidomethyl); C39(Carbamidomethyl); C47(Carbamidomethyl)	2	51	[]	[]	[]	[]	9999	132.53	PS-008	0	P|000	7029.45	-0.142464	P1	P1	Unmod	P1	P|000 → P1
A	R02	A_R02	PS	995	30486.4	14.8959	-0.646618	28.769	7028.6	-0.992181	-0.992181	Sperm protamine P1	P1	['P1']	ARYRCCRSQSRSRYYRQRQRSRRRRRRSCQTRRRAMRCCRPRYRPRCRRH	ARYRccRSQSRSRYYRQRQRSRRRRRRScQTRRRAMRccRPRYRPRcRRH	C5(Carbamidomethyl); C6(Carbamidomethyl); C29(Carbamidomethyl); C38(Carbamidomethyl); C39(Carbamidomethyl); C47(Carbamidomethyl)	2	51	[]	[]	[]	[]	9999	78.83	PS-008	0	P|000	7029.45	-0.142464	P1	P1	Unmod	P1	P|000 → P1
B	R03	B_R03	PS	267	859167	19.7126	1.32561	7.995	7028.6	-0.992181	-0.992181	Sperm protamine P1	P1	['P1']	ARYRCCRSQSRSRYYRQRQRSRRRRRRSCQTRRRAMRCCRPRYRPRCRRH	ARYRccRSQSRSRYYRQRQRSRRRRRRScQTRRRAMRccRPRYRPRcRRH	C5(Carbamidomethyl); C6(Carbamidomethyl); C29(Carbamidomethyl); C38(Carbamidomethyl); C39(Carbamidomethyl); C47(Carbamidomethyl)	2	51	[]	[]	[]	[]	9999	104.15	PS-008	0	P|000	7029.45	-0.142464	P1	P1	Unmod	P1	P|000 → P1
A	R01	A_R01	PS	870	43273.3	15.4012	-0.788789	24.9134	7028.6	-0.992181	-0.992181	Sperm protamine P1	P1	['P1']	ARYRCCRSQSRSRYYRQRQRSRRRRRRSCQTRRRAMRCCRPRYRPRCRRH	ARYRccRSQSRSRYYRQRQRSRRRRRRScQTRRRAMRccRPRYRPRcRRH	C5(Carbamidomethyl); C6(Carbamidomethyl); C29(Carbamidomethyl); C38(Carbamidomethyl); C39(Carbamidomethyl); C47(Carbamidomethyl)	2	51	[]	[]	[]	[]	9999	86.41	PS-008	0	P|000	7029.45	-0.142464	P1	P1	Unmod	P1	P|000 → P1
B	R03	B_R03	PS	289	1.70043e+06	20.6975	1.70748	8.6239	7028.6	-0.991981	-0.991981	Sperm protamine P1	P1	['P1']	ARYRCCRSQSRSRYYRQRQRSRRRRRRSCQTRRRAMRCCRPRYRPRCRRH	ARYRccRSQSRSRYYRQRQRSRRRRRRScQTRRRAMRccRPRYRPRcRRH	C5(Carbamidomethyl); C6(Carbamidomethyl); C29(Carbamidomethyl); C38(Carbamidomethyl); C39(Carbamidomethyl); C47(Carbamidomethyl)	2	51	[]	[]	[]	[]	9999	108.65	PS-008	0	P|000	7029.45	-0.142464	P1	P1	Unmod	P1	P|000 → P1
A	R02	A_R02	PS	427	499935	18.9314	1.02273	12.6387	7028.6	-0.991781	-0.991781	Sperm protamine P1	P1	['P1']	ARYRCCRSQSRSRYYRQRQRSRRRRRRSCQTRRRAMRCCRPRYRPRCRRH	ARYRccRSQSRSRYYRQRQRSRRRRRRScQTRRRAMRccRPRYRPRcRRH	C5(Carbamidomethyl); C6(Carbamidomethyl); C29(Carbamidomethyl); C38(Carbamidomethyl); C39(Carbamidomethyl); C47(Carbamidomethyl)	2	51	[]	[]	[]	[]	9999	130.69	PS-008	0	P|000	7029.45	-0.142464	P1	P1	Unmod	P1	P|000 → P1
A	R02	A_R02	PS	307	430941	18.7171	0.934098	9.1803	7028.6	-0.991681	-0.991681	Sperm protamine P1	P1	['P1']	ARYRCCRSQSRSRYYRQRQRSRRRRRRSCQTRRRAMRCCRPRYRPRCRRH	ARYRccRSQSRSRYYRQRQRSRRRRRRScQTRRRAMRccRPRYRPRcRRH	C5(Carbamidomethyl); C6(Carbamidomethyl); C29(Carbamidomethyl); C38(Carbamidomethyl); C39(Carbamidomethyl); C47(Carbamidomethyl)	2	51	[]	[]	[]	[]	9999	94.3	PS-008	0	P|000	7029.45	-0.142464	P1	P1	Unmod	P1	P|000 → P1
B	R03	B_R03	PS	345	2.48172e+06	21.2429	1.91897	10.2034	7028.6	-0.991481	-0.991481	Sperm protamine P1	P1	['P1']	ARYRCCRSQSRSRYYRQRQRSRRRRRRSCQTRRRAMRCCRPRYRPRCRRH	ARYRccRSQSRSRYYRQRQRSRRRRRRScQTRRRAMRccRPRYRPRcRRH	C5(Carbamidomethyl); C6(Carbamidomethyl); C29(Carbamidomethyl); C38(Carbamidomethyl); C39(Carbamidomethyl); C47(Carbamidomethyl)	2	51	[]	[]	[]	[]	9999	126.12	PS-008	0	P|000	7029.45	-0.142464	P1	P1	Unmod	P1	P|000 → P1
A	R01	A_R01	PS	382	1.41837e+06	20.4358	1.57202	11.0968	7028.6	-0.991381	-0.991381	Sperm protamine P1	P1	['P1']	ARYRCCRSQSRSRYYRQRQRSRRRRRRSCQTRRRAMRCCRPRYRPRCRRH	ARYRccRSQSRSRYYRQRQRSRRRRRRScQTRRRAMRccRPRYRPRcRRH	C5(Carbamidomethyl); C6(Carbamidomethyl); C29(Carbamidomethyl); C38(Carbamidomethyl); C39(Carbamidomethyl); C47(Carbamidomethyl)	2	51	[]	[]	[]	[]	9999	113.74	PS-008	0	P|000	7029.45	-0.142464	P1	P1	Unmod	P1	P|000 → P1
A	R02	A_R02	PS	325	398363	18.6037	0.887186	9.6936	7028.6	-0.991381	-0.991381	Sperm protamine P1	P1	['P1']	ARYRCCRSQSRSRYYRQRQRSRRRRRRSCQTRRRAMRCCRPRYRPRCRRH	ARYRccRSQSRSRYYRQRQRSRRRRRRScQTRRRAMRccRPRYRPRcRRH	C5(Carbamidomethyl); C6(Carbamidomethyl); C29(Carbamidomethyl); C38(Carbamidomethyl); C39(Carbamidomethyl); C47(Carbamidomethyl)	2	51	[]	[]	[]	[]	9999	136.69	PS-008	0	P|000	7029.45	-0.142464	P1	P1	Unmod	P1	P|000 → P1
A	R02	A_R02	PS	193	18759.6	14.1953	-0.936404	5.8004	7028.6	-0.991181	-0.991181	Sperm protamine P1	P1	['P1']	ARYRCCRSQSRSRYYRQRQRSRRRRRRSCQTRRRAMRCCRPRYRPRCRRH	ARYRccRSQSRSRYYRQRQRSRRRRRRScQTRRRAMRccRPRYRPRcRRH	C5(Carbamidomethyl); C6(Carbamidomethyl); C29(Carbamidomethyl); C38(Carbamidomethyl); C39(Carbamidomethyl); C47(Carbamidomethyl)	2	51	[]	[]	[]	[]	9999	52.17	PS-008	0	P|000	7029.45	-0.142464	P1	P1	Unmod	P1	P|000 → P1
A	R02	A_R02	PS	261	268886	18.0366	0.652601	7.8555	7028.6	-0.991081	-0.991081	Sperm protamine P1	P1	['P1']	ARYRCCRSQSRSRYYRQRQRSRRRRRRSCQTRRRAMRCCRPRYRPRCRRH	ARYRccRSQSRSRYYRQRQRSRRRRRRScQTRRRAMRccRPRYRPRcRRH	C5(Carbamidomethyl); C6(Carbamidomethyl); C29(Carbamidomethyl); C38(Carbamidomethyl); C39(Carbamidomethyl); C47(Carbamidomethyl)	2	51	[]	[]	[]	[]	9999	97.58	PS-008	0	P|000	7029.45	-0.142464	P1	P1	Unmod	P1	P|000 → P1
B	R03	B_R03	PS	197	31724.2	14.9533	-0.519717	5.8963	7028.6	-0.990881	-0.990881	Sperm protamine P1	P1	['P1']	ARYRCCRSQSRSRYYRQRQRSRRRRRRSCQTRRRAMRCCRPRYRPRCRRH	ARYRccRSQSRSRYYRQRQRSRRRRRRScQTRRRAMRccRPRYRPRcRRH	C5(Carbamidomethyl); C6(Carbamidomethyl); C29(Carbamidomethyl); C38(Carbamidomethyl); C39(Carbamidomethyl); C47(Carbamidomethyl)	2	51	[]	[]	[]	[]	9999	75.93	PS-008	0	P|000	7029.45	-0.142464	P1	P1	Unmod	P1	P|000 → P1
A	R02	A_R02	PS	1129	36219.2	15.1445	-0.543786	32.6573	7028.6	-0.990781	-0.990781	Sperm protamine P1	P1	['P1']	ARYRCCRSQSRSRYYRQRQRSRRRRRRSCQTRRRAMRCCRPRYRPRCRRH	ARYRccRSQSRSRYYRQRQRSRRRRRRScQTRRRAMRccRPRYRPRcRRH	C5(Carbamidomethyl); C6(Carbamidomethyl); C29(Carbamidomethyl); C38(Carbamidomethyl); C39(Carbamidomethyl); C47(Carbamidomethyl)	2	51	[]	[]	[]	[]	9999	80.72	PS-008	0	P|000	7029.45	-0.142464	P1	P1	Unmod	P1	P|000 → P1
B	R03	B_R03	PS	135	35883.4	15.131	-0.450805	4.0253	7028.61	-0.990581	-0.990581	Sperm protamine P1	P1	['P1']	ARYRCCRSQSRSRYYRQRQRSRRRRRRSCQTRRRAMRCCRPRYRPRCRRH	ARYRccRSQSRSRYYRQRQRSRRRRRRScQTRRRAMRccRPRYRPRcRRH	C5(Carbamidomethyl); C6(Carbamidomethyl); C29(Carbamidomethyl); C38(Carbamidomethyl); C39(Carbamidomethyl); C47(Carbamidomethyl)	2	51	[]	[]	[]	[]	9999	48.95	PS-008	0	P|000	7029.45	-0.142464	P1	P1	Unmod	P1	P|000 → P1
A	R02	A_R02	PS	369	275058	18.0694	0.666145	10.9438	7028.61	-0.990481	-0.990481	Sperm protamine P1	P1	['P1']	ARYRCCRSQSRSRYYRQRQRSRRRRRRSCQTRRRAMRCCRPRYRPRCRRH	ARYRccRSQSRSRYYRQRQRSRRRRRRScQTRRRAMRccRPRYRPRcRRH	C5(Carbamidomethyl); C6(Carbamidomethyl); C29(Carbamidomethyl); C38(Carbamidomethyl); C39(Carbamidomethyl); C47(Carbamidomethyl)	2	51	[]	[]	[]	[]	9999	127.91	PS-008	0	P|000	7029.45	-0.142464	P1	P1	Unmod	P1	P|000 → P1
A	R02	A_R02	PS	1215	52233.8	15.6727	-0.325276	35.1613	7028.61	-0.990381	-0.990381	Sperm protamine P1	P1	['P1']	ARYRCCRSQSRSRYYRQRQRSRRRRRRSCQTRRRAMRCCRPRYRPRCRRH	ARYRccRSQSRSRYYRQRQRSRRRRRRScQTRRRAMRccRPRYRPRcRRH	C5(Carbamidomethyl); C6(Carbamidomethyl); C29(Carbamidomethyl); C38(Carbamidomethyl); C39(Carbamidomethyl); C47(Carbamidomethyl)	2	51	[]	[]	[]	[]	9999	110.62	PS-008	0	P|000	7029.45	-0.142464	P1	P1	Unmod	P1	P|000 → P1
A	R01	A_R01	PS	272	555222	19.0827	0.937535	8.0675	7028.61	-0.990181	-0.990181	Sperm protamine P1	P1	['P1']	ARYRCCRSQSRSRYYRQRQRSRRRRRRSCQTRRRAMRCCRPRYRPRCRRH	ARYRccRSQSRSRYYRQRQRSRRRRRRScQTRRRAMRccRPRYRPRcRRH	C5(Carbamidomethyl); C6(Carbamidomethyl); C29(Carbamidomethyl); C38(Carbamidomethyl); C39(Carbamidomethyl); C47(Carbamidomethyl)	2	51	[]	[]	[]	[]	9999	110.58	PS-008	0	P|000	7029.45	-0.142464	P1	P1	Unmod	P1	P|000 → P1
A	R02	A_R02	PS	319	1.09297e+06	20.0598	1.48952	9.5305	7028.61	-0.990181	-0.990181	Sperm protamine P1	P1	['P1']	ARYRCCRSQSRSRYYRQRQRSRRRRRRSCQTRRRAMRCCRPRYRPRCRRH	ARYRccRSQSRSRYYRQRQRSRRRRRRScQTRRRAMRccRPRYRPRcRRH	C5(Carbamidomethyl); C6(Carbamidomethyl); C29(Carbamidomethyl); C38(Carbamidomethyl); C39(Carbamidomethyl); C47(Carbamidomethyl)	2	51	[]	[]	[]	[]	9999	134.92	PS-008	0	P|000	7029.45	-0.142464	P1	P1	Unmod	P1	P|000 → P1
A	R02	A_R02	PS	277	250315	17.9334	0.60989	8.3192	7028.61	-0.989881	-0.989881	Sperm protamine P1	P1	['P1']	ARYRCCRSQSRSRYYRQRQRSRRRRRRSCQTRRRAMRCCRPRYRPRCRRH	ARYRccRSQSRSRYYRQRQRSRRRRRRScQTRRRAMRccRPRYRPRcRRH	C5(Carbamidomethyl); C6(Carbamidomethyl); C29(Carbamidomethyl); C38(Carbamidomethyl); C39(Carbamidomethyl); C47(Carbamidomethyl)	2	51	[]	[]	[]	[]	9999	72.63	PS-008	0	P|000	7029.45	-0.142464	P1	P1	Unmod	P1	P|000 → P1
B	R03	B_R03	PS	164	18339.2	14.1626	-0.826279	4.9002	7028.61	-0.989781	-0.989781	Sperm protamine P1	P1	['P1']	ARYRCCRSQSRSRYYRQRQRSRRRRRRSCQTRRRAMRCCRPRYRPRCRRH	ARYRccRSQSRSRYYRQRQRSRRRRRRScQTRRRAMRccRPRYRPRcRRH	C5(Carbamidomethyl); C6(Carbamidomethyl); C29(Carbamidomethyl); C38(Carbamidomethyl); C39(Carbamidomethyl); C47(Carbamidomethyl)	2	51	[]	[]	[]	[]	9999	47.45	PS-008	0	P|000	7029.45	-0.142464	P1	P1	Unmod	P1	P|000 → P1
B	R03	B_R03	PS	269	573645	19.1298	1.09965	8.0528	7028.61	-0.989581	-0.989581	Sperm protamine P1	P1	['P1']	ARYRCCRSQSRSRYYRQRQRSRRRRRRSCQTRRRAMRCCRPRYRPRCRRH	ARYRccRSQSRSRYYRQRQRSRRRRRRScQTRRRAMRccRPRYRPRcRRH	C5(Carbamidomethyl); C6(Carbamidomethyl); C29(Carbamidomethyl); C38(Carbamidomethyl); C39(Carbamidomethyl); C47(Carbamidomethyl)	2	51	[]	[]	[]	[]	9999	104.75	PS-008	0	P|000	7029.45	-0.142464	P1	P1	Unmod	P1	P|000 → P1
B	R04	B_R04	PS	1195	71001.3	16.1156	-0.752075	33.8159	7028.61	-0.989581	-0.989581	Sperm protamine P1	P1	['P1']	ARYRCCRSQSRSRYYRQRQRSRRRRRRSCQTRRRAMRCCRPRYRPRCRRH	ARYRccRSQSRSRYYRQRQRSRRRRRRScQTRRRAMRccRPRYRPRcRRH	C5(Carbamidomethyl); C6(Carbamidomethyl); C29(Carbamidomethyl); C38(Carbamidomethyl); C39(Carbamidomethyl); C47(Carbamidomethyl)	2	51	[]	[]	[]	[]	9999	93.01	PS-008	0	P|000	7029.45	-0.142464	P1	P1	Unmod	P1	P|000 → P1
B	R03	B_R03	PS	86	26978.8	14.7195	-0.610354	2.5479	7028.61	-0.989481	-0.989481	Sperm protamine P1	P1	['P1']	ARYRCCRSQSRSRYYRQRQRSRRRRRRSCQTRRRAMRCCRPRYRPRCRRH	ARYRccRSQSRSRYYRQRQRSRRRRRRScQTRRRAMRccRPRYRPRcRRH	C5(Carbamidomethyl); C6(Carbamidomethyl); C29(Carbamidomethyl); C38(Carbamidomethyl); C39(Carbamidomethyl); C47(Carbamidomethyl)	2	51	[]	[]	[]	[]	9999	57.9	PS-008	0	P|000	7029.45	-0.142464	P1	P1	Unmod	P1	P|000 → P1
A	R02	A_R02	PS	363	1.2563e+06	20.2607	1.57264	10.7856	7028.61	-0.989481	-0.989481	Sperm protamine P1	P1	['P1']	ARYRCCRSQSRSRYYRQRQRSRRRRRRSCQTRRRAMRCCRPRYRPRCRRH	ARYRccRSQSRSRYYRQRQRSRRRRRRScQTRRRAMRccRPRYRPRcRRH	C5(Carbamidomethyl); C6(Carbamidomethyl); C29(Carbamidomethyl); C38(Carbamidomethyl); C39(Carbamidomethyl); C47(Carbamidomethyl)	2	51	[]	[]	[]	[]	9999	129.54	PS-008	0	P|000	7029.45	-0.142464	P1	P1	Unmod	P1	P|000 → P1
B	R03	B_R03	PS	143	23954.6	14.548	-0.676858	4.2667	7028.61	-0.989281	-0.989281	Sperm protamine P1	P1	['P1']	ARYRCCRSQSRSRYYRQRQRSRRRRRRSCQTRRRAMRCCRPRYRPRCRRH	ARYRccRSQSRSRYYRQRQRSRRRRRRScQTRRRAMRccRPRYRPRcRRH	C5(Carbamidomethyl); C6(Carbamidomethyl); C29(Carbamidomethyl); C38(Carbamidomethyl); C39(Carbamidomethyl); C47(Carbamidomethyl)	2	51	[]	[]	[]	[]	9999	67.24	PS-008	0	P|000	7029.45	-0.142464	P1	P1	Unmod	P1	P|000 → P1
B	R03	B_R03	PS	239	31518.8	14.9439	-0.523351	7.1606	7028.61	-0.988881	-0.988881	Sperm protamine P1	P1	['P1']	ARYRCCRSQSRSRYYRQRQRSRRRRRRSCQTRRRAMRCCRPRYRPRCRRH	ARYRccRSQSRSRYYRQRQRSRRRRRRScQTRRRAMRccRPRYRPRcRRH	C5(Carbamidomethyl); C6(Carbamidomethyl); C29(Carbamidomethyl); C38(Carbamidomethyl); C39(Carbamidomethyl); C47(Carbamidomethyl)	2	51	[]	[]	[]	[]	9999	62.61	PS-008	0	P|000	7029.45	-0.142464	P1	P1	Unmod	P1	P|000 → P1
A	R01	A_R01	PS	404	1.2897e+06	20.2986	1.50769	11.7077	7028.61	-0.988281	-0.988281	Sperm protamine P1	P1	['P1']	ARYRCCRSQSRSRYYRQRQRSRRRRRRSCQTRRRAMRCCRPRYRPRCRRH	ARYRccRSQSRSRYYRQRQRSRRRRRRScQTRRRAMRccRPRYRPRcRRH	C5(Carbamidomethyl); C6(Carbamidomethyl); C29(Carbamidomethyl); C38(Carbamidomethyl); C39(Carbamidomethyl); C47(Carbamidomethyl)	2	51	[]	[]	[]	[]	9999	125.61	PS-008	0	P|000	7029.45	-0.142464	P1	P1	Unmod	P1	P|000 → P1
A	R01	A_R01	PS	444	676335	19.3674	1.07102	12.8716	7028.61	-0.988281	-0.988281	Sperm protamine P1	P1	['P1']	ARYRCCRSQSRSRYYRQRQRSRRRRRRSCQTRRRAMRCCRPRYRPRCRRH	ARYRccRSQSRSRYYRQRQRSRRRRRRScQTRRRAMRccRPRYRPRcRRH	C5(Carbamidomethyl); C6(Carbamidomethyl); C29(Carbamidomethyl); C38(Carbamidomethyl); C39(Carbamidomethyl); C47(Carbamidomethyl)	2	51	[]	[]	[]	[]	9999	129.42	PS-008	0	P|000	7029.45	-0.142464	P1	P1	Unmod	P1	P|000 → P1
B	R03	B_R03	PS	335	1.1798e+06	20.1701	1.50301	9.9197	7028.61	-0.988181	-0.988181	Sperm protamine P1	P1	['P1']	ARYRCCRSQSRSRYYRQRQRSRRRRRRSCQTRRRAMRCCRPRYRPRCRRH	ARYRccRSQSRSRYYRQRQRSRRRRRRScQTRRRAMRccRPRYRPRcRRH	C5(Carbamidomethyl); C6(Carbamidomethyl); C29(Carbamidomethyl); C38(Carbamidomethyl); C39(Carbamidomethyl); C47(Carbamidomethyl)	2	51	[]	[]	[]	[]	9999	118.09	PS-008	0	P|000	7029.45	-0.142464	P1	P1	Unmod	P1	P|000 → P1
A	R01	A_R01	PS	360	3.30769e+06	21.6574	2.14485	10.4911	7028.61	-0.987981	-0.987981	Sperm protamine P1	P1	['P1']	ARYRCCRSQSRSRYYRQRQRSRRRRRRSCQTRRRAMRCCRPRYRPRCRRH	ARYRccRSQSRSRYYRQRQRSRRRRRRScQTRRRAMRccRPRYRPRcRRH	C5(Carbamidomethyl); C6(Carbamidomethyl); C29(Carbamidomethyl); C38(Carbamidomethyl); C39(Carbamidomethyl); C47(Carbamidomethyl)	2	51	[]	[]	[]	[]	9999	140.54	PS-008	0	P|000	7029.45	-0.142464	P1	P1	Unmod	P1	P|000 → P1
B	R03	B_R03	PS	259	350978	18.421	0.824831	7.7626	7028.61	-0.987781	-0.987781	Sperm protamine P1	P1	['P1']	ARYRCCRSQSRSRYYRQRQRSRRRRRRSCQTRRRAMRCCRPRYRPRCRRH	ARYRccRSQSRSRYYRQRQRSRRRRRRScQTRRRAMRccRPRYRPRcRRH	C5(Carbamidomethyl); C6(Carbamidomethyl); C29(Carbamidomethyl); C38(Carbamidomethyl); C39(Carbamidomethyl); C47(Carbamidomethyl)	2	51	[]	[]	[]	[]	9999	106.63	PS-008	0	P|000	7029.45	-0.142464	P1	P1	Unmod	P1	P|000 → P1
A	R01	A_R01	PS	294	1.19148e+06	20.1843	1.4541	8.6977	7028.61	-0.987681	-0.987681	Sperm protamine P1	P1	['P1']	ARYRCCRSQSRSRYYRQRQRSRRRRRRSCQTRRRAMRCCRPRYRPRCRRH	ARYRccRSQSRSRYYRQRQRSRRRRRRScQTRRRAMRccRPRYRPRcRRH	C5(Carbamidomethyl); C6(Carbamidomethyl); C29(Carbamidomethyl); C38(Carbamidomethyl); C39(Carbamidomethyl); C47(Carbamidomethyl)	2	51	[]	[]	[]	[]	9999	126.41	PS-008	0	P|000	7029.45	-0.142464	P1	P1	Unmod	P1	P|000 → P1
A	R01	A_R01	PS	424	1.22166e+06	20.2204	1.47102	12.286	7028.61	-0.987181	-0.987181	Sperm protamine P1	P1	['P1']	ARYRCCRSQSRSRYYRQRQRSRRRRRRSCQTRRRAMRCCRPRYRPRCRRH	ARYRccRSQSRSRYYRQRQRSRRRRRRScQTRRRAMRccRPRYRPRcRRH	C5(Carbamidomethyl); C6(Carbamidomethyl); C29(Carbamidomethyl); C38(Carbamidomethyl); C39(Carbamidomethyl); C47(Carbamidomethyl)	2	51	[]	[]	[]	[]	9999	136.37	PS-008	0	P|000	7029.45	-0.142464	P1	P1	Unmod	P1	P|000 → P1
A	R01	A_R01	PS	298	525877	19.0044	0.9008	8.8025	7028.61	-0.987181	-0.987181	Sperm protamine P1	P1	['P1']	ARYRCCRSQSRSRYYRQRQRSRRRRRRSCQTRRRAMRCCRPRYRPRCRRH	ARYRccRSQSRSRYYRQRQRSRRRRRRScQTRRRAMRccRPRYRPRcRRH	C5(Carbamidomethyl); C6(Carbamidomethyl); C29(Carbamidomethyl); C38(Carbamidomethyl); C39(Carbamidomethyl); C47(Carbamidomethyl)	2	51	[]	[]	[]	[]	9999	120.89	PS-008	0	P|000	7029.45	-0.142464	P1	P1	Unmod	P1	P|000 → P1
B	R04	B_R04	PS	855	137640	17.0705	-0.376087	23.9148	7028.61	-0.987181	-0.987181	Sperm protamine P1	P1	['P1']	ARYRCCRSQSRSRYYRQRQRSRRRRRRSCQTRRRAMRCCRPRYRPRCRRH	ARYRccRSQSRSRYYRQRQRSRRRRRRScQTRRRAMRccRPRYRPRcRRH	C5(Carbamidomethyl); C6(Carbamidomethyl); C29(Carbamidomethyl); C38(Carbamidomethyl); C39(Carbamidomethyl); C47(Carbamidomethyl)	2	51	[]	[]	[]	[]	9999	119.11	PS-008	0	P|000	7029.45	-0.142464	P1	P1	Unmod	P1	P|000 → P1
A	R01	A_R01	PS	1012	58233.6	15.8296	-0.587917	29.0513	7028.61	-0.987081	-0.987081	Sperm protamine P1	P1	['P1']	ARYRCCRSQSRSRYYRQRQRSRRRRRRSCQTRRRAMRCCRPRYRPRCRRH	ARYRccRSQSRSRYYRQRQRSRRRRRRScQTRRRAMRccRPRYRPRcRRH	C5(Carbamidomethyl); C6(Carbamidomethyl); C29(Carbamidomethyl); C38(Carbamidomethyl); C39(Carbamidomethyl); C47(Carbamidomethyl)	2	51	[]	[]	[]	[]	9999	89.05	PS-008	0	P|000	7029.45	-0.142464	P1	P1	Unmod	P1	P|000 → P1
B	R03	B_R03	PS	271	335677	18.3567	0.799898	8.1108	7028.61	-0.986881	-0.986881	Sperm protamine P1	P1	['P1']	ARYRCCRSQSRSRYYRQRQRSRRRRRRSCQTRRRAMRCCRPRYRPRCRRH	ARYRccRSQSRSRYYRQRQRSRRRRRRScQTRRRAMRccRPRYRPRcRRH	C5(Carbamidomethyl); C6(Carbamidomethyl); C29(Carbamidomethyl); C38(Carbamidomethyl); C39(Carbamidomethyl); C47(Carbamidomethyl)	2	51	[]	[]	[]	[]	9999	102.45	PS-008	0	P|000	7029.45	-0.142464	P1	P1	Unmod	P1	P|000 → P1
A	R01	A_R01	PS	344	1.60856e+06	20.6173	1.65715	10.066	7028.61	-0.986581	-0.986581	Sperm protamine P1	P1	['P1']	ARYRCCRSQSRSRYYRQRQRSRRRRRRSCQTRRRAMRCCRPRYRPRCRRH	ARYRccRSQSRSRYYRQRQRSRRRRRRScQTRRRAMRccRPRYRPRcRRH	C5(Carbamidomethyl); C6(Carbamidomethyl); C29(Carbamidomethyl); C38(Carbamidomethyl); C39(Carbamidomethyl); C47(Carbamidomethyl)	2	51	[]	[]	[]	[]	9999	123.8	PS-008	0	P|000	7029.45	-0.142464	P1	P1	Unmod	P1	P|000 → P1
A	R02	A_R02	PS	130	24986.7	14.6089	-0.765342	3.8977	7028.61	-0.986481	-0.986481	Sperm protamine P1	P1	['P1']	ARYRCCRSQSRSRYYRQRQRSRRRRRRSCQTRRRAMRCCRPRYRPRCRRH	ARYRccRSQSRSRYYRQRQRSRRRRRRScQTRRRAMRccRPRYRPRcRRH	C5(Carbamidomethyl); C6(Carbamidomethyl); C29(Carbamidomethyl); C38(Carbamidomethyl); C39(Carbamidomethyl); C47(Carbamidomethyl)	2	51	[]	[]	[]	[]	9999	70.77	PS-008	0	P|000	7029.45	-0.142464	P1	P1	Unmod	P1	P|000 → P1
A	R02	A_R02	PS	211	19456.2	14.2479	-0.914645	6.3454	7028.61	-0.985681	-0.985681	Sperm protamine P1	P1	['P1']	ARYRCCRSQSRSRYYRQRQRSRRRRRRSCQTRRRAMRCCRPRYRPRCRRH	ARYRccRSQSRSRYYRQRQRSRRRRRRScQTRRRAMRccRPRYRPRcRRH	C5(Carbamidomethyl); C6(Carbamidomethyl); C29(Carbamidomethyl); C38(Carbamidomethyl); C39(Carbamidomethyl); C47(Carbamidomethyl)	2	51	[]	[]	[]	[]	9999	50.14	PS-008	0	P|000	7029.45	-0.142464	P1	P1	Unmod	P1	P|000 → P1
A	R02	A_R02	TP	325	4005000000	31.8992	0.655946	9.69367	7028.61	-0.985535	-0.985535	P04553	P1	['P1']	ARYRCCRSQSRSRYYRQRQRSRRRRRRSCQTRRRAMRCCRPRYRPRCRRH	M.ARYR(C)[Carbamidomethylation](C)[Carbamidomethylation]RSQSRSRYYRQRQRSRRRRRRS(C)[Carbamidomethylation]QTRRRAMR(C)[Carbamidomethylation](C)[Carbamidomethylation]RPRYRPR(C)[Carbamidomethylation]RRH.		2	51	[]	[]	[]	[]		48.0329	TP-071	0	P|000	7029.45	-0.142464	P1	P1	Unmod	P1	P|000 → P1
A	R02	A_R02	PS	299	1.28204e+06	20.29	1.58474	8.957	7028.61	-0.985481	-0.985481	Sperm protamine P1	P1	['P1']	ARYRCCRSQSRSRYYRQRQRSRRRRRRSCQTRRRAMRCCRPRYRPRCRRH	ARYRccRSQSRSRYYRQRQRSRRRRRRScQTRRRAMRccRPRYRPRcRRH	C5(Carbamidomethyl); C6(Carbamidomethyl); C29(Carbamidomethyl); C38(Carbamidomethyl); C39(Carbamidomethyl); C47(Carbamidomethyl)	2	51	[]	[]	[]	[]	9999	123.07	PS-008	0	P|000	7029.45	-0.142464	P1	P1	Unmod	P1	P|000 → P1
A	R02	A_R02	PS	321	1.31649e+06	20.3283	1.60057	9.5857	7028.61	-0.985281	-0.985281	Sperm protamine P1	P1	['P1']	ARYRCCRSQSRSRYYRQRQRSRRRRRRSCQTRRRAMRCCRPRYRPRCRRH	ARYRccRSQSRSRYYRQRQRSRRRRRRScQTRRRAMRccRPRYRPRcRRH	C5(Carbamidomethyl); C6(Carbamidomethyl); C29(Carbamidomethyl); C38(Carbamidomethyl); C39(Carbamidomethyl); C47(Carbamidomethyl)	2	51	[]	[]	[]	[]	9999	128.84	PS-008	0	P|000	7029.45	-0.142464	P1	P1	Unmod	P1	P|000 → P1
A	R02	A_R02	PS	365	1.20836e+06	20.2046	1.54942	10.8326	7028.61	-0.984881	-0.984881	Sperm protamine P1	P1	['P1']	ARYRCCRSQSRSRYYRQRQRSRRRRRRSCQTRRRAMRCCRPRYRPRCRRH	ARYRccRSQSRSRYYRQRQRSRRRRRRScQTRRRAMRccRPRYRPRcRRH	C5(Carbamidomethyl); C6(Carbamidomethyl); C29(Carbamidomethyl); C38(Carbamidomethyl); C39(Carbamidomethyl); C47(Carbamidomethyl)	2	51	[]	[]	[]	[]	9999	124.11	PS-008	0	P|000	7029.45	-0.142464	P1	P1	Unmod	P1	P|000 → P1
B	R03	B_R03	TP	201	5713000000	32.4116	0.938315	6.017	7028.61	-0.984595	-0.984595	P04553	P1	['P1']	ARYRCCRSQSRSRYYRQRQRSRRRRRRSCQTRRRAMRCCRPRYRPRCRRH	M.ARYR(C)[Carbamidomethylation](C)[Carbamidomethylation]RSQS(RSRYYR)[-0.9946]QRQRSRRRRRRS(C)[Carbamidomethylation]QTRRRAMR(C)[Carbamidomethylation](C)[Carbamidomethylation]RPRYRPR(C)[Carbamidomethylation]RRH.		2	51	[]	[]	[]	[]		6.94069	TP-071	0	P|000	7029.45	-0.142464	P1	P1	Unmod	P1	P|000 → P1
A	R01	A_R01	PS	426	826756	19.6571	1.20688	12.342	7028.61	-0.984581	-0.984581	Sperm protamine P1	P1	['P1']	ARYRCCRSQSRSRYYRQRQRSRRRRRRSCQTRRRAMRCCRPRYRPRCRRH	ARYRccRSQSRSRYYRQRQRSRRRRRRScQTRRRAMRccRPRYRPRcRRH	C5(Carbamidomethyl); C6(Carbamidomethyl); C29(Carbamidomethyl); C38(Carbamidomethyl); C39(Carbamidomethyl); C47(Carbamidomethyl)	2	51	[]	[]	[]	[]	9999	133.74	PS-008	0	P|000	7029.45	-0.142464	P1	P1	Unmod	P1	P|000 → P1
B	R03	B_R03	PS	417	825329	19.6546	1.30313	12.251	7028.61	-0.984581	-0.984581	Sperm protamine P1	P1	['P1']	ARYRCCRSQSRSRYYRQRQRSRRRRRRSCQTRRRAMRCCRPRYRPRCRRH	ARYRccRSQSRSRYYRQRQRSRRRRRRScQTRRRAMRccRPRYRPRcRRH	C5(Carbamidomethyl); C6(Carbamidomethyl); C29(Carbamidomethyl); C38(Carbamidomethyl); C39(Carbamidomethyl); C47(Carbamidomethyl)	2	51	[]	[]	[]	[]	9999	135.69	PS-008	0	P|000	7029.45	-0.142464	P1	P1	Unmod	P1	P|000 → P1
A	R01	A_R01	PS	338	2.91966e+06	21.4774	2.06043	9.9076	7028.61	-0.984281	-0.984281	Sperm protamine P1	P1	['P1']	ARYRCCRSQSRSRYYRQRQRSRRRRRRSCQTRRRAMRCCRPRYRPRCRRH	ARYRccRSQSRSRYYRQRQRSRRRRRRScQTRRRAMRccRPRYRPRcRRH	C5(Carbamidomethyl); C6(Carbamidomethyl); C29(Carbamidomethyl); C38(Carbamidomethyl); C39(Carbamidomethyl); C47(Carbamidomethyl)	2	51	[]	[]	[]	[]	9999	114.85	PS-008	0	P|000	7029.45	-0.142464	P1	P1	Unmod	P1	P|000 → P1
A	R01	A_R01	PS	388	546864	19.0608	0.927274	11.2567	7028.61	-0.983881	-0.983881	Sperm protamine P1	P1	['P1']	ARYRCCRSQSRSRYYRQRQRSRRRRRRSCQTRRRAMRCCRPRYRPRCRRH	ARYRccRSQSRSRYYRQRQRSRRRRRRScQTRRRAMRccRPRYRPRcRRH	C5(Carbamidomethyl); C6(Carbamidomethyl); C29(Carbamidomethyl); C38(Carbamidomethyl); C39(Carbamidomethyl); C47(Carbamidomethyl)	2	51	[]	[]	[]	[]	9999	102.09	PS-008	0	P|000	7029.45	-0.142464	P1	P1	Unmod	P1	P|000 → P1
B	R03	B_R03	PS	301	2.4934e+06	21.2497	1.9216	8.973	7028.61	-0.983881	-0.983881	Sperm protamine P1	P1	['P1']	ARYRCCRSQSRSRYYRQRQRSRRRRRRSCQTRRRAMRCCRPRYRPRCRRH	ARYRccRSQSRSRYYRQRQRSRRRRRRScQTRRRAMRccRPRYRPRcRRH	C5(Carbamidomethyl); C6(Carbamidomethyl); C29(Carbamidomethyl); C38(Carbamidomethyl); C39(Carbamidomethyl); C47(Carbamidomethyl)	2	51	[]	[]	[]	[]	9999	115.15	PS-008	0	P|000	7029.45	-0.142464	P1	P1	Unmod	P1	P|000 → P1
B	R03	B_R03	PS	95	19809.2	14.2739	-0.783148	2.8184	7028.61	-0.983681	-0.983681	Sperm protamine P1	P1	['P1']	ARYRCCRSQSRSRYYRQRQRSRRRRRRSCQTRRRAMRCCRPRYRPRCRRH	ARYRccRSQSRSRYYRQRQRSRRRRRRScQTRRRAMRccRPRYRPRcRRH	C5(Carbamidomethyl); C6(Carbamidomethyl); C29(Carbamidomethyl); C38(Carbamidomethyl); C39(Carbamidomethyl); C47(Carbamidomethyl)	2	51	[]	[]	[]	[]	9999	50.86	PS-008	0	P|000	7029.45	-0.142464	P1	P1	Unmod	P1	P|000 → P1
A	R01	A_R01	PS	306	370154	18.4978	0.663247	9.0446	7028.61	-0.983681	-0.983681	Sperm protamine P1	P1	['P1']	ARYRCCRSQSRSRYYRQRQRSRRRRRRSCQTRRRAMRCCRPRYRPRCRRH	ARYRccRSQSRSRYYRQRQRSRRRRRRScQTRRRAMRccRPRYRPRcRRH	C5(Carbamidomethyl); C6(Carbamidomethyl); C29(Carbamidomethyl); C38(Carbamidomethyl); C39(Carbamidomethyl); C47(Carbamidomethyl)	2	51	[]	[]	[]	[]	9999	103.78	PS-008	0	P|000	7029.45	-0.142464	P1	P1	Unmod	P1	P|000 → P1
A	R01	A_R01	PS	464	479880	18.8723	0.838879	13.4547	7028.61	-0.983281	-0.983281	Sperm protamine P1	P1	['P1']	ARYRCCRSQSRSRYYRQRQRSRRRRRRSCQTRRRAMRCCRPRYRPRCRRH	ARYRccRSQSRSRYYRQRQRSRRRRRRScQTRRRAMRccRPRYRPRcRRH	C5(Carbamidomethyl); C6(Carbamidomethyl); C29(Carbamidomethyl); C38(Carbamidomethyl); C39(Carbamidomethyl); C47(Carbamidomethyl)	2	51	[]	[]	[]	[]	9999	124.47	PS-008	0	P|000	7029.45	-0.142464	P1	P1	Unmod	P1	P|000 → P1
B	R03	B_R03	TP	58	5713000000	32.4116	0.938315	1.70367	7028.61	-0.983245	-0.983245	P04553	P1	['P1']	ARYRCCRSQSRSRYYRQRQRSRRRRRRSCQTRRRAMRCCRPRYRPRCRRH	M.ARYR(C)[Carbamidomethylation](C)[Carbamidomethylation]RSQSRSRYYRQ(RQRSRRRRRRS(C)[Carbamidomethylation]QTRRR)[-0.7733]AMR(C)[Carbamidomethylation](C)[Carbamidomethylation]RPRYRPR(C)[Carbamidomethylation]RRH.		2	51	[]	[]	[]	[]		13.0163	TP-071	0	P|000	7029.45	-0.142464	P1	P1	Unmod	P1	P|000 → P1
A	R01	A_R01	PS	276	363648	18.4722	0.651252	8.1831	7028.61	-0.983181	-0.983181	Sperm protamine P1	P1	['P1']	ARYRCCRSQSRSRYYRQRQRSRRRRRRSCQTRRRAMRCCRPRYRPRCRRH	ARYRccRSQSRSRYYRQRQRSRRRRRRScQTRRRAMRccRPRYRPRcRRH	C5(Carbamidomethyl); C6(Carbamidomethyl); C29(Carbamidomethyl); C38(Carbamidomethyl); C39(Carbamidomethyl); C47(Carbamidomethyl)	2	51	[]	[]	[]	[]	9999	120.66	PS-008	0	P|000	7029.45	-0.142464	P1	P1	Unmod	P1	P|000 → P1
B	R03	B_R03	PS	156	27251.5	14.734	-0.604727	4.6583	7028.61	-0.982881	-0.982881	Sperm protamine P1	P1	['P1']	ARYRCCRSQSRSRYYRQRQRSRRRRRRSCQTRRRAMRCCRPRYRPRCRRH	ARYRccRSQSRSRYYRQRQRSRRRRRRScQTRRRAMRccRPRYRPRcRRH	C5(Carbamidomethyl); C6(Carbamidomethyl); C29(Carbamidomethyl); C38(Carbamidomethyl); C39(Carbamidomethyl); C47(Carbamidomethyl)	2	51	[]	[]	[]	[]	9999	81.32	PS-008	0	P|000	7029.45	-0.142464	P1	P1	Unmod	P1	P|000 → P1
A	R01	A_R01	TP	456	5938000000	32.4673	0.731954	13.2212	7028.61	-0.982845	-0.982845	P04553	P1	['P1']	ARYRCCRSQSRSRYYRQRQRSRRRRRRSCQTRRRAMRCCRPRYRPRCRRH	M.ARYR(C)[Carbamidomethylation](C)[Carbamidomethylation]RSQSRSRYYRQRQRSRRRRRRS(C)[Carbamidomethylation]QTRRRAMR(C)[Carbamidomethylation](C)[Carbamidomethylation]RPRYRPR(C)[Carbamidomethylation]RRH.		2	51	[]	[]	[]	[]		39.2806	TP-071	0	P|000	7029.45	-0.142464	P1	P1	Unmod	P1	P|000 → P1
A	R02	A_R02	PS	259	198794	17.6009	0.47236	7.7972	7028.61	-0.982381	-0.982381	Sperm protamine P1	P1	['P1']	ARYRCCRSQSRSRYYRQRQRSRRRRRRSCQTRRRAMRCCRPRYRPRCRRH	ARYRccRSQSRSRYYRQRQRSRRRRRRScQTRRRAMRccRPRYRPRcRRH	C5(Carbamidomethyl); C6(Carbamidomethyl); C29(Carbamidomethyl); C38(Carbamidomethyl); C39(Carbamidomethyl); C47(Carbamidomethyl)	2	51	[]	[]	[]	[]	9999	101.56	PS-008	0	P|000	7029.45	-0.142464	P1	P1	Unmod	P1	P|000 → P1
B	R03	B_R03	PS	323	2.56044e+06	21.288	1.93644	9.5879	7028.61	-0.981281	-0.981281	Sperm protamine P1	P1	['P1']	ARYRCCRSQSRSRYYRQRQRSRRRRRRSCQTRRRAMRCCRPRYRPRCRRH	ARYRccRSQSRSRYYRQRQRSRRRRRRScQTRRRAMRccRPRYRPRcRRH	C5(Carbamidomethyl); C6(Carbamidomethyl); C29(Carbamidomethyl); C38(Carbamidomethyl); C39(Carbamidomethyl); C47(Carbamidomethyl)	2	51	[]	[]	[]	[]	9999	143.77	PS-008	0	P|000	7029.45	-0.142464	P1	P1	Unmod	P1	P|000 → P1
A	R01	A_R01	PS	314	1.70462e+06	20.701	1.69639	9.2732	7028.61	-0.981281	-0.981281	Sperm protamine P1	P1	['P1']	ARYRCCRSQSRSRYYRQRQRSRRRRRRSCQTRRRAMRCCRPRYRPRCRRH	ARYRccRSQSRSRYYRQRQRSRRRRRRScQTRRRAMRccRPRYRPRcRRH	C5(Carbamidomethyl); C6(Carbamidomethyl); C29(Carbamidomethyl); C38(Carbamidomethyl); C39(Carbamidomethyl); C47(Carbamidomethyl)	2	51	[]	[]	[]	[]	9999	109.1	PS-008	0	P|000	7029.45	-0.142464	P1	P1	Unmod	P1	P|000 → P1
A	R02	A_R02	PS	341	1.8094e+06	20.7871	1.79036	10.1604	7028.61	-0.981181	-0.981181	Sperm protamine P1	P1	['P1']	ARYRCCRSQSRSRYYRQRQRSRRRRRRSCQTRRRAMRCCRPRYRPRCRRH	ARYRccRSQSRSRYYRQRQRSRRRRRRScQTRRRAMRccRPRYRPRcRRH	C5(Carbamidomethyl); C6(Carbamidomethyl); C29(Carbamidomethyl); C38(Carbamidomethyl); C39(Carbamidomethyl); C47(Carbamidomethyl)	2	51	[]	[]	[]	[]	9999	126.46	PS-008	0	P|000	7029.45	-0.142464	P1	P1	Unmod	P1	P|000 → P1
A	R02	A_R02	PS	279	1.09564e+06	20.0633	1.49097	8.3772	7028.61	-0.981081	-0.981081	Sperm protamine P1	P1	['P1']	ARYRCCRSQSRSRYYRQRQRSRRRRRRSCQTRRRAMRCCRPRYRPRCRRH	ARYRccRSQSRSRYYRQRQRSRRRRRRScQTRRRAMRccRPRYRPRcRRH	C5(Carbamidomethyl); C6(Carbamidomethyl); C29(Carbamidomethyl); C38(Carbamidomethyl); C39(Carbamidomethyl); C47(Carbamidomethyl)	2	51	[]	[]	[]	[]	9999	117.95	PS-008	0	P|000	7029.45	-0.142464	P1	P1	Unmod	P1	P|000 → P1
B	R03	B_R03	PS	279	2.46494e+06	21.2331	1.91517	8.3434	7028.61	-0.980781	-0.980781	Sperm protamine P1	P1	['P1']	ARYRCCRSQSRSRYYRQRQRSRRRRRRSCQTRRRAMRCCRPRYRPRCRRH	ARYRccRSQSRSRYYRQRQRSRRRRRRScQTRRRAMRccRPRYRPRcRRH	C5(Carbamidomethyl); C6(Carbamidomethyl); C29(Carbamidomethyl); C38(Carbamidomethyl); C39(Carbamidomethyl); C47(Carbamidomethyl)	2	51	[]	[]	[]	[]	9999	102.31	PS-008	0	P|000	7029.45	-0.142464	P1	P1	Unmod	P1	P|000 → P1
A	R02	A_R02	TP	73	4005000000	31.8992	0.655946	2.17167	7028.62	-0.980565	-0.980565	P04553	P1	['P1']	ARYRCCRSQSRSRYYRQRQRSRRRRRRSCQTRRRAMRCCRPRYRPRCRRH	M.ARYR(C)[Carbamidomethylation](C)[Carbamidomethylation]RSQSRSRYYRQ(RQRSR)[-0.9856]RRRRRS(C)[Carbamidomethylation]QTRRRAMR(C)[Carbamidomethylation](C)[Carbamidomethylation]RPRYRPR(C)[Carbamidomethylation]RRH.		2	51	[]	[]	[]	[]		14.9379	TP-071	0	P|000	7029.45	-0.142464	P1	P1	Unmod	P1	P|000 → P1
B	R04	B_R04	TP	831	709800000	29.4028	-0.571492	23.2108	7028.62	-0.980445	-0.980445	P04553	P1	['P1']	ARYRCCRSQSRSRYYRQRQRSRRRRRRSCQTRRRAMRCCRPRYRPRCRRH	M.ARYR(C)[Carbamidomethylation](C)[Carbamidomethylation]RSQSRSRYYRQRQRSRRRRRRS(C)[Carbamidomethylation]QTRRRAMR(C)[Carbamidomethylation](C)[Carbamidomethylation]RPRYRPR(C)[Carbamidomethylation]RRH.		2	51	[]	[]	[]	[]		33.3821	TP-071	0	P|000	7029.45	-0.142464	P1	P1	Unmod	P1	P|000 → P1
A	R01	A_R01	PS	292	1.72049e+06	20.7144	1.70266	8.6474	7028.62	-0.980281	-0.980281	Sperm protamine P1	P1	['P1']	ARYRCCRSQSRSRYYRQRQRSRRRRRRSCQTRRRAMRCCRPRYRPRCRRH	ARYRccRSQSRSRYYRQRQRSRRRRRRScQTRRRAMRccRPRYRPRcRRH	C5(Carbamidomethyl); C6(Carbamidomethyl); C29(Carbamidomethyl); C38(Carbamidomethyl); C39(Carbamidomethyl); C47(Carbamidomethyl)	2	51	[]	[]	[]	[]	9999	131.13	PS-008	0	P|000	7029.45	-0.142464	P1	P1	Unmod	P1	P|000 → P1
B	R04	B_R04	PS	1265	99085.6	16.5964	-0.562766	35.8639	7028.62	-0.980081	-0.980081	Sperm protamine P1	P1	['P1']	ARYRCCRSQSRSRYYRQRQRSRRRRRRSCQTRRRAMRCCRPRYRPRCRRH	ARYRccRSQSRSRYYRQRQRSRRRRRRScQTRRRAMRccRPRYRPRcRRH	C5(Carbamidomethyl); C6(Carbamidomethyl); C29(Carbamidomethyl); C38(Carbamidomethyl); C39(Carbamidomethyl); C47(Carbamidomethyl)	2	51	[]	[]	[]	[]	9999	96.84	PS-008	0	P|000	7029.45	-0.142464	P1	P1	Unmod	P1	P|000 → P1
A	R02	A_R02	PS	73	8684.31	13.0842	-1.39605	2.1717	7028.62	-0.979081	-0.979081	Sperm protamine P1	P1	['P1']	ARYRCCRSQSRSRYYRQRQRSRRRRRRSCQTRRRAMRCCRPRYRPRCRRH	ARYRccRSQSRSRYYRQRQRSRRRRRRScQTRRRAMRccRPRYRPRcRRH	C5(Carbamidomethyl); C6(Carbamidomethyl); C29(Carbamidomethyl); C38(Carbamidomethyl); C39(Carbamidomethyl); C47(Carbamidomethyl)	2	51	[]	[]	[]	[]	9999	27.35	PS-008	0	P|000	7029.45	-0.142464	P1	P1	Unmod	P1	P|000 → P1
B	R03	B_R03	PS	397	820714	19.6465	1.3	11.6733	7028.62	-0.978881	-0.978881	Sperm protamine P1	P1	['P1']	ARYRCCRSQSRSRYYRQRQRSRRRRRRSCQTRRRAMRCCRPRYRPRCRRH	ARYRccRSQSRSRYYRQRQRSRRRRRRScQTRRRAMRccRPRYRPRcRRH	C5(Carbamidomethyl); C6(Carbamidomethyl); C29(Carbamidomethyl); C38(Carbamidomethyl); C39(Carbamidomethyl); C47(Carbamidomethyl)	2	51	[]	[]	[]	[]	9999	110.01	PS-008	0	P|000	7029.45	-0.142464	P1	P1	Unmod	P1	P|000 → P1
B	R04	B_R04	PS	1261	121694	16.8929	-0.446027	35.7472	7028.62	-0.978681	-0.978681	Sperm protamine P1	P1	['P1']	ARYRCCRSQSRSRYYRQRQRSRRRRRRSCQTRRRAMRCCRPRYRPRCRRH	ARYRccRSQSRSRYYRQRQRSRRRRRRScQTRRRAMRccRPRYRPRcRRH	C5(Carbamidomethyl); C6(Carbamidomethyl); C29(Carbamidomethyl); C38(Carbamidomethyl); C39(Carbamidomethyl); C47(Carbamidomethyl)	2	51	[]	[]	[]	[]	9999	65.09	PS-008	0	P|000	7029.45	-0.142464	P1	P1	Unmod	P1	P|000 → P1
A	R02	A_R02	TP	365	4005000000	31.8992	0.655946	10.8325	7028.62	-0.978555	-0.978555	P04553	P1	['P1']	ARYRCCRSQSRSRYYRQRQRSRRRRRRSCQTRRRAMRCCRPRYRPRCRRH	M.ARYR(C)[Carbamidomethylation](C)[Carbamidomethylation]RSQSRSRYYRQRQRSRRRRRRS(C)[Carbamidomethylation]QTRRRAMR(C)[Carbamidomethylation](C)[Carbamidomethylation]RPRYRPR(C)[Carbamidomethylation]RRH.		2	51	[]	[]	[]	[]		39.8285	TP-071	0	P|000	7029.45	-0.142464	P1	P1	Unmod	P1	P|000 → P1
A	R02	A_R02	PS	281	1.31564e+06	20.3273	1.60018	8.4342	7028.62	-0.977981	-0.977981	Sperm protamine P1	P1	['P1']	ARYRCCRSQSRSRYYRQRQRSRRRRRRSCQTRRRAMRCCRPRYRPRCRRH	ARYRccRSQSRSRYYRQRQRSRRRRRRScQTRRRAMRccRPRYRPRcRRH	C5(Carbamidomethyl); C6(Carbamidomethyl); C29(Carbamidomethyl); C38(Carbamidomethyl); C39(Carbamidomethyl); C47(Carbamidomethyl)	2	51	[]	[]	[]	[]	9999	132.14	PS-008	0	P|000	7029.45	-0.142464	P1	P1	Unmod	P1	P|000 → P1
A	R01	A_R01	TP	322	5938000000	32.4673	0.731954	9.48417	7028.62	-0.977715	-0.977715	P04553	P1	['P1']	ARYRCCRSQSRSRYYRQRQRSRRRRRRSCQTRRRAMRCCRPRYRPRCRRH	M.ARYR(C)[Carbamidomethylation](C)[Carbamidomethylation]RSQSRSRYYRQRQRSRRRRRRS(C)[Carbamidomethylation]QTRRRAMR(C)[Carbamidomethylation](C)[Carbamidomethylation]RPRYRPR(C)[Carbamidomethylation]RRH.		2	51	[]	[]	[]	[]		48.6981	TP-071	0	P|000	7029.45	-0.142464	P1	P1	Unmod	P1	P|000 → P1
A	R02	A_R02	TP	393	4005000000	31.8992	0.655946	11.6472	7028.62	-0.977525	-0.977525	P04553	P1	['P1']	ARYRCCRSQSRSRYYRQRQRSRRRRRRSCQTRRRAMRCCRPRYRPRCRRH	M.ARYR(C)[Carbamidomethylation](C)[Carbamidomethylation]RSQSRSRYYRQRQRSRRRRRRS(C)[Carbamidomethylation]QTRRRAMR(C)[Carbamidomethylation](C)[Carbamidomethylation]RPRYRPR(C)[Carbamidomethylation]RRH.		2	51	[]	[]	[]	[]		46.0237	TP-071	0	P|000	7029.45	-0.142464	P1	P1	Unmod	P1	P|000 → P1
A	R01	A_R01	PS	274	699775	19.4165	1.09407	8.1253	7028.62	-0.977081	-0.977081	Sperm protamine P1	P1	['P1']	ARYRCCRSQSRSRYYRQRQRSRRRRRRSCQTRRRAMRCCRPRYRPRCRRH	ARYRccRSQSRSRYYRQRQRSRRRRRRScQTRRRAMRccRPRYRPRcRRH	C5(Carbamidomethyl); C6(Carbamidomethyl); C29(Carbamidomethyl); C38(Carbamidomethyl); C39(Carbamidomethyl); C47(Carbamidomethyl)	2	51	[]	[]	[]	[]	9999	128.83	PS-008	0	P|000	7029.45	-0.142464	P1	P1	Unmod	P1	P|000 → P1
B	R03	B_R03	PS	107	41708.4	15.3481	-0.366658	3.1808	7028.62	-0.976881	-0.976881	Sperm protamine P1	P1	['P1']	ARYRCCRSQSRSRYYRQRQRSRRRRRRSCQTRRRAMRCCRPRYRPRCRRH	ARYRccRSQSRSRYYRQRQRSRRRRRRScQTRRRAMRccRPRYRPRcRRH	C5(Carbamidomethyl); C6(Carbamidomethyl); C29(Carbamidomethyl); C38(Carbamidomethyl); C39(Carbamidomethyl); C47(Carbamidomethyl)	2	51	[]	[]	[]	[]	9999	82.36	PS-008	0	P|000	7029.45	-0.142464	P1	P1	Unmod	P1	P|000 → P1
B	R03	B_R03	PS	185	23096.9	14.4954	-0.697254	5.5335	7028.62	-0.976181	-0.976181	Sperm protamine P1	P1	['P1']	ARYRCCRSQSRSRYYRQRQRSRRRRRRSCQTRRRAMRCCRPRYRPRCRRH	ARYRccRSQSRSRYYRQRQRSRRRRRRScQTRRRAMRccRPRYRPRcRRH	C5(Carbamidomethyl); C6(Carbamidomethyl); C29(Carbamidomethyl); C38(Carbamidomethyl); C39(Carbamidomethyl); C47(Carbamidomethyl)	2	51	[]	[]	[]	[]	9999	55.19	PS-008	0	P|000	7029.45	-0.142464	P1	P1	Unmod	P1	P|000 → P1
A	R02	A_R02	TP	839	4005000000	31.8992	0.655946	24.2232	7028.62	-0.975675	-0.975675	P04553	P1	['P1']	ARYRCCRSQSRSRYYRQRQRSRRRRRRSCQTRRRAMRCCRPRYRPRCRRH	M.ARYR(C)[Carbamidomethylation](C)[Carbamidomethylation]RSQSRSRYYRQRQRSRRRRRRS(C)[Carbamidomethylation]QTRRRAMR(C)[Carbamidomethylation](C)[Carbamidomethylation]RPRYRPR(C)[Carbamidomethylation]RRH.		2	51	[]	[]	[]	[]		31.3706	TP-071	0	P|000	7029.45	-0.142464	P1	P1	Unmod	P1	P|000 → P1
B	R03	B_R03	TP	205	5713000000	32.4116	0.938315	6.138	7028.62	-0.975465	-0.975465	P04553	P1	['P1']	ARYRCCRSQSRSRYYRQRQRSRRRRRRSCQTRRRAMRCCRPRYRPRCRRH	M.ARYR(C)[Carbamidomethylation](C)[Carbamidomethylation]RSQSRSRYYRQRQRSRRRRRRS(C)[Carbamidomethylation]QTRRRAMR(C)[Carbamidomethylation](C)[Carbamidomethylation]RPRYRPR(C)[Carbamidomethylation]RRH.		2	51	[]	[]	[]	[]		28.8088	TP-071	0	P|000	7029.45	-0.142464	P1	P1	Unmod	P1	P|000 → P1
A	R02	A_R02	PS	153	22977.5	14.4879	-0.81537	4.5908	7028.62	-0.975381	-0.975381	Sperm protamine P1	P1	['P1']	ARYRCCRSQSRSRYYRQRQRSRRRRRRSCQTRRRAMRCCRPRYRPRCRRH	ARYRccRSQSRSRYYRQRQRSRRRRRRScQTRRRAMRccRPRYRPRcRRH	C5(Carbamidomethyl); C6(Carbamidomethyl); C29(Carbamidomethyl); C38(Carbamidomethyl); C39(Carbamidomethyl); C47(Carbamidomethyl)	2	51	[]	[]	[]	[]	9999	62.48	PS-008	0	P|000	7029.45	-0.142464	P1	P1	Unmod	P1	P|000 → P1
A	R02	A_R02	PS	241	22914.7	14.484	-0.817005	7.2549	7028.62	-0.974781	-0.974781	Sperm protamine P1	P1	['P1']	ARYRCCRSQSRSRYYRQRQRSRRRRRRSCQTRRRAMRCCRPRYRPRCRRH	ARYRccRSQSRSRYYRQRQRSRRRRRRScQTRRRAMRccRPRYRPRcRRH	C5(Carbamidomethyl); C6(Carbamidomethyl); C29(Carbamidomethyl); C38(Carbamidomethyl); C39(Carbamidomethyl); C47(Carbamidomethyl)	2	51	[]	[]	[]	[]	9999	56.46	PS-008	0	P|000	7029.45	-0.142464	P1	P1	Unmod	P1	P|000 → P1
A	R02	A_R02	TP	1175	4005000000	31.8992	0.655946	33.9925	7028.62	-0.974195	-0.974195	P04553	P1	['P1']	ARYRCCRSQSRSRYYRQRQRSRRRRRRSCQTRRRAMRCCRPRYRPRCRRH	M.ARYR(C)[Carbamidomethylation](C)[Carbamidomethylation]RSQSRSRYYRQRQRSRRRRRRS(C)[Carbamidomethylation]QTRRRAMR(C)[Carbamidomethylation](C)[Carbamidomethylation]RPRYRPR(C)[Carbamidomethylation]RRH.		2	51	[]	[]	[]	[]		36.0285	TP-071	0	P|000	7029.45	-0.142464	P1	P1	Unmod	P1	P|000 → P1
A	R01	A_R01	PS	416	428110	18.7076	0.761652	12.053	7028.62	-0.973281	-0.973281	Sperm protamine P1	P1	['P1']	ARYRCCRSQSRSRYYRQRQRSRRRRRRSCQTRRRAMRCCRPRYRPRCRRH	ARYRccRSQSRSRYYRQRQRSRRRRRRScQTRRRAMRccRPRYRPRcRRH	C5(Carbamidomethyl); C6(Carbamidomethyl); C29(Carbamidomethyl); C38(Carbamidomethyl); C39(Carbamidomethyl); C47(Carbamidomethyl)	2	51	[]	[]	[]	[]	9999	100.45	PS-008	0	P|000	7029.45	-0.142464	P1	P1	Unmod	P1	P|000 → P1
A	R02	A_R02	PS	69	18627.9	14.1852	-0.940609	2.0509	7028.62	-0.973181	-0.973181	Sperm protamine P1	P1	['P1']	ARYRCCRSQSRSRYYRQRQRSRRRRRRSCQTRRRAMRCCRPRYRPRCRRH	ARYRccRSQSRSRYYRQRQRSRRRRRRScQTRRRAMRccRPRYRPRcRRH	C5(Carbamidomethyl); C6(Carbamidomethyl); C29(Carbamidomethyl); C38(Carbamidomethyl); C39(Carbamidomethyl); C47(Carbamidomethyl)	2	51	[]	[]	[]	[]	9999	64.32	PS-008	0	P|000	7029.45	-0.142464	P1	P1	Unmod	P1	P|000 → P1
A	R02	A_R02	PS	31	14963	13.8691	-1.07135	0.9016	7028.63	-0.968181	-0.968181	Sperm protamine P1	P1	['P1']	ARYRCCRSQSRSRYYRQRQRSRRRRRRSCQTRRRAMRCCRPRYRPRCRRH	ARYRccRSQSRSRYYRQRQRSRRRRRRScQTRRRAMRccRPRYRPRcRRH	C5(Carbamidomethyl); C6(Carbamidomethyl); C29(Carbamidomethyl); C38(Carbamidomethyl); C39(Carbamidomethyl); C47(Carbamidomethyl)	2	51	[]	[]	[]	[]	9999	55.81	PS-008	0	P|000	7029.45	-0.142464	P1	P1	Unmod	P1	P|000 → P1
A	R02	A_R02	PS	407	692642	19.4018	1.2173	12.0549	7028.63	-0.968081	-0.968081	Sperm protamine P1	P1	['P1']	ARYRCCRSQSRSRYYRQRQRSRRRRRRSCQTRRRAMRCCRPRYRPRCRRH	ARYRccRSQSRSRYYRQRQRSRRRRRRScQTRRRAMRccRPRYRPRcRRH	C5(Carbamidomethyl); C6(Carbamidomethyl); C29(Carbamidomethyl); C38(Carbamidomethyl); C39(Carbamidomethyl); C47(Carbamidomethyl)	2	51	[]	[]	[]	[]	9999	141.27	PS-008	0	P|000	7029.45	-0.142464	P1	P1	Unmod	P1	P|000 → P1
A	R02	A_R02	PS	447	517134	18.9802	1.04291	13.2255	7028.63	-0.966681	-0.966681	Sperm protamine P1	P1	['P1']	ARYRCCRSQSRSRYYRQRQRSRRRRRRSCQTRRRAMRCCRPRYRPRCRRH	ARYRccRSQSRSRYYRQRQRSRRRRRRScQTRRRAMRccRPRYRPRcRRH	C5(Carbamidomethyl); C6(Carbamidomethyl); C29(Carbamidomethyl); C38(Carbamidomethyl); C39(Carbamidomethyl); C47(Carbamidomethyl)	2	51	[]	[]	[]	[]	9999	79.55	PS-008	0	P|000	7029.45	-0.142464	P1	P1	Unmod	P1	P|000 → P1
A	R02	A_R02	PS	83	24818.2	14.5991	-0.769379	2.4749	7028.63	-0.962981	-0.962981	Sperm protamine P1	P1	['P1']	ARYRCCRSQSRSRYYRQRQRSRRRRRRSCQTRRRAMRCCRPRYRPRCRRH	ARYRccRSQSRSRYYRQRQRSRRRRRRScQTRRRAMRccRPRYRPRcRRH	C5(Carbamidomethyl); C6(Carbamidomethyl); C29(Carbamidomethyl); C38(Carbamidomethyl); C39(Carbamidomethyl); C47(Carbamidomethyl)	2	51	[]	[]	[]	[]	9999	48.99	PS-008	0	P|000	7029.45	-0.142464	P1	P1	Unmod	P1	P|000 → P1
A	R01	A_R01	PS	358	2.25579e+06	21.1052	1.88592	10.4447	7028.63	-0.961481	-0.961481	Sperm protamine P1	P1	['P1']	ARYRCCRSQSRSRYYRQRQRSRRRRRRSCQTRRRAMRCCRPRYRPRCRRH	ARYRccRSQSRSRYYRQRQRSRRRRRRScQTRRRAMRccRPRYRPRcRRH	C5(Carbamidomethyl); C6(Carbamidomethyl); C29(Carbamidomethyl); C38(Carbamidomethyl); C39(Carbamidomethyl); C47(Carbamidomethyl)	2	51	[]	[]	[]	[]	9999	112.6	PS-008	0	P|000	7029.45	-0.142464	P1	P1	Unmod	P1	P|000 → P1
A	R02	A_R02	PS	393	203035	17.6314	0.484957	11.6471	7028.63	-0.961281	-0.961281	Sperm protamine P1	P1	['P1']	ARYRCCRSQSRSRYYRQRQRSRRRRRRSCQTRRRAMRCCRPRYRPRCRRH	ARYRccRSQSRSRYYRQRQRSRRRRRRScQTRRRAMRccRPRYRPRcRRH	C5(Carbamidomethyl); C6(Carbamidomethyl); C29(Carbamidomethyl); C38(Carbamidomethyl); C39(Carbamidomethyl); C47(Carbamidomethyl)	2	51	[]	[]	[]	[]	9999	119.19	PS-008	0	P|000	7029.45	-0.142464	P1	P1	Unmod	P1	P|000 → P1
A	R02	A_R02	PS	233	17174.8	14.068	-0.989079	7.0114	7028.64	-0.958581	-0.958581	Sperm protamine P1	P1	['P1']	ARYRCCRSQSRSRYYRQRQRSRRRRRRSCQTRRRAMRCCRPRYRPRCRRH	ARYRccRSQSRSRYYRQRQRSRRRRRRScQTRRRAMRccRPRYRPRcRRH	C5(Carbamidomethyl); C6(Carbamidomethyl); C29(Carbamidomethyl); C38(Carbamidomethyl); C39(Carbamidomethyl); C47(Carbamidomethyl)	2	51	[]	[]	[]	[]	9999	59.51	PS-008	0	P|000	7029.45	-0.142464	P1	P1	Unmod	P1	P|000 → P1
B	R04	B_R04	PS	831	174907	17.4162	-0.239987	23.2108	7028.64	-0.958481	-0.958481	Sperm protamine P1	P1	['P1']	ARYRCCRSQSRSRYYRQRQRSRRRRRRSCQTRRRAMRCCRPRYRPRCRRH	ARYRccRSQSRSRYYRQRQRSRRRRRRScQTRRRAMRccRPRYRPRcRRH	C5(Carbamidomethyl); C6(Carbamidomethyl); C29(Carbamidomethyl); C38(Carbamidomethyl); C39(Carbamidomethyl); C47(Carbamidomethyl)	2	51	[]	[]	[]	[]	9999	111.28	PS-008	0	P|000	7029.45	-0.142464	P1	P1	Unmod	P1	P|000 → P1
A	R02	A_R02	PS	112	27270	14.735	-0.713157	3.3529	7028.65	-0.949781	-0.949781	Sperm protamine P1	P1	['P1']	ARYRCCRSQSRSRYYRQRQRSRRRRRRSCQTRRRAMRCCRPRYRPRCRRH	ARYRccRSQSRSRYYRQRQRSRRRRRRScQTRRRAMRccRPRYRPRcRRH	C5(Carbamidomethyl); C6(Carbamidomethyl); C29(Carbamidomethyl); C38(Carbamidomethyl); C39(Carbamidomethyl); C47(Carbamidomethyl)	2	51	[]	[]	[]	[]	9999	76.55	PS-008	0	P|000	7029.45	-0.142464	P1	P1	Unmod	P1	P|000 → P1
A	R02	A_R02	PS	110	27394	14.7416	-0.710449	3.2923	7028.65	-0.948281	-0.948281	Sperm protamine P1	P1	['P1']	ARYRCCRSQSRSRYYRQRQRSRRRRRRSCQTRRRAMRCCRPRYRPRCRRH	ARYRccRSQSRSRYYRQRQRSRRRRRRScQTRRRAMRccRPRYRPRcRRH	C5(Carbamidomethyl); C6(Carbamidomethyl); C29(Carbamidomethyl); C38(Carbamidomethyl); C39(Carbamidomethyl); C47(Carbamidomethyl)	2	51	[]	[]	[]	[]	9999	67.42	PS-008	0	P|000	7029.45	-0.142464	P1	P1	Unmod	P1	P|000 → P1
B	R03	B_R03	PS	313	825113	19.6542	1.30299	9.3012	7028.65	-0.947281	-0.947281	Sperm protamine P1	P1	['P1']	ARYRCCRSQSRSRYYRQRQRSRRRRRRSCQTRRRAMRCCRPRYRPRCRRH	ARYRccRSQSRSRYYRQRQRSRRRRRRScQTRRRAMRccRPRYRPRcRRH	C5(Carbamidomethyl); C6(Carbamidomethyl); C29(Carbamidomethyl); C38(Carbamidomethyl); C39(Carbamidomethyl); C47(Carbamidomethyl)	2	51	[]	[]	[]	[]	9999	134.55	PS-008	0	P|000	7029.45	-0.142464	P1	P1	Unmod	P1	P|000 → P1
A	R02	A_R02	PS	138	3563.04	11.7989	-1.92773	4.14	7029.47	-0.130271	-0.130271	Sperm protamine P1	P1	['P1']	ARYRCCRSQSRSRYYRQRQRSRRRRRRSCQTRRRAMRCCRPRYRPRCRRH	ARYRccRSQSRSRYYRQRQRSRRRRRRScQTRRRAMRccRPRYRPRcRRH	C5(Carbamidomethyl); C6(Carbamidomethyl); C29(Carbamidomethyl); C38(Carbamidomethyl); C39(Carbamidomethyl); C47(Carbamidomethyl)	2	51	[]	[]	[]	[]	9999	22.99	PS-008	0	P|000	7029.45	-0.142464	P1	P1	Unmod	P1	P|000 → P1
B	R03	B_R03	PS	331	478613	18.8685	0.998334	9.8148	7029.58	-0.0164815	-0.0164815	Sperm protamine P1	P1	['P1']	ARYRCCRSQSRSRYYRQRQRSRRRRRRSCQTRRRAMRCCRPRYRPRCRRH	ARYRccRSQSRSRYYRQRQRSRRRRRRScQTRRRAMRccRPRYRPRcRRH	C5(Carbamidomethyl); C6(Carbamidomethyl); C29(Carbamidomethyl); C38(Carbamidomethyl); C39(Carbamidomethyl); C47(Carbamidomethyl)	2	51	[]	[]	[]	[]	9999	115.03	PS-008	0	P|000	7029.45	-0.142464	P1	P1	Unmod	P1	P|000 → P1
A	R02	A_R02	PS	987	52391.1	15.677	-0.323482	28.5366	7029.58	-0.0150815	-0.0150815	Sperm protamine P1	P1	['P1']	ARYRCCRSQSRSRYYRQRQRSRRRRRRSCQTRRRAMRCCRPRYRPRCRRH	ARYRccRSQSRSRYYRQRQRSRRRRRRScQTRRRAMRccRPRYRPRcRRH	C5(Carbamidomethyl); C6(Carbamidomethyl); C29(Carbamidomethyl); C38(Carbamidomethyl); C39(Carbamidomethyl); C47(Carbamidomethyl)	2	51	[]	[]	[]	[]	9999	92.84	PS-008	0	P|000	7029.45	-0.142464	P1	P1	Unmod	P1	P|000 → P1
A	R01	A_R01	PS	690	191095	17.5439	0.215979	19.6484	7029.58	-0.0144815	-0.0144815	Sperm protamine P1	P1	['P1']	ARYRCCRSQSRSRYYRQRQRSRRRRRRSCQTRRRAMRCCRPRYRPRCRRH	ARYRccRSQSRSRYYRQRQRSRRRRRRScQTRRRAMRccRPRYRPRcRRH	C5(Carbamidomethyl); C6(Carbamidomethyl); C29(Carbamidomethyl); C38(Carbamidomethyl); C39(Carbamidomethyl); C47(Carbamidomethyl)	2	51	[]	[]	[]	[]	9999	45.74	PS-008	0	P|000	7029.45	-0.142464	P1	P1	Unmod	P1	P|000 → P1
B	R03	B_R03	PS	45	18554.4	14.1795	-0.819754	1.3141	7029.58	-0.0117815	-0.0117815	Sperm protamine P1	P1	['P1']	ARYRCCRSQSRSRYYRQRQRSRRRRRRSCQTRRRAMRCCRPRYRPRCRRH	ARYRccRSQSRSRYYRQRQRSRRRRRRScQTRRRAMRccRPRYRPRcRRH	C5(Carbamidomethyl); C6(Carbamidomethyl); C29(Carbamidomethyl); C38(Carbamidomethyl); C39(Carbamidomethyl); C47(Carbamidomethyl)	2	51	[]	[]	[]	[]	9999	59.34	PS-008	0	P|000	7029.45	-0.142464	P1	P1	Unmod	P1	P|000 → P1
B	R03	B_R03	PS	535	286876	18.1301	0.71202	15.3955	7029.59	-0.00828147	-0.00828147	Sperm protamine P1	P1	['P1']	ARYRCCRSQSRSRYYRQRQRSRRRRRRSCQTRRRAMRCCRPRYRPRCRRH	ARYRccRSQSRSRYYRQRQRSRRRRRRScQTRRRAMRccRPRYRPRcRRH	C5(Carbamidomethyl); C6(Carbamidomethyl); C29(Carbamidomethyl); C38(Carbamidomethyl); C39(Carbamidomethyl); C47(Carbamidomethyl)	2	51	[]	[]	[]	[]	9999	50.07	PS-008	0	P|000	7029.45	-0.142464	P1	P1	Unmod	P1	P|000 → P1
B	R03	B_R03	PS	247	18517.8	14.1766	-0.820858	7.4021	7029.59	-0.00578147	-0.00578147	Sperm protamine P1	P1	['P1']	ARYRCCRSQSRSRYYRQRQRSRRRRRRSCQTRRRAMRCCRPRYRPRCRRH	ARYRccRSQSRSRYYRQRQRSRRRRRRScQTRRRAMRccRPRYRPRcRRH	C5(Carbamidomethyl); C6(Carbamidomethyl); C29(Carbamidomethyl); C38(Carbamidomethyl); C39(Carbamidomethyl); C47(Carbamidomethyl)	2	51	[]	[]	[]	[]	9999	49.96	PS-008	0	P|000	7029.45	-0.142464	P1	P1	Unmod	P1	P|000 → P1
B	R03	B_R03	TP	291	5713000000	32.4116	0.938315	8.67333	7029.59	-0.001685	-0.001685	P04553	P1	['P1']	ARYRCCRSQSRSRYYRQRQRSRRRRRRSCQTRRRAMRCCRPRYRPRCRRH	M.ARYR(C)[Carbamidomethylation](C)[Carbamidomethylation]RSQSRSRYYRQRQRSRRRRRRS(C)[Carbamidomethylation]QTRRRAMR(C)[Carbamidomethylation](C)[Carbamidomethylation]RPRYRPR(C)[Carbamidomethylation]RRH.		2	51	[]	[]	[]	[]		28.5709	TP-071	0	P|000	7029.45	-0.142464	P1	P1	Unmod	P1	P|000 → P1
B	R04	B_R04	PS	1143	101232	16.6273	-0.550593	32.2983	7029.59	-0.00168147	-0.00168147	Sperm protamine P1	P1	['P1']	ARYRCCRSQSRSRYYRQRQRSRRRRRRSCQTRRRAMRCCRPRYRPRCRRH	ARYRccRSQSRSRYYRQRQRSRRRRRRScQTRRRAMRccRPRYRPRcRRH	C5(Carbamidomethyl); C6(Carbamidomethyl); C29(Carbamidomethyl); C38(Carbamidomethyl); C39(Carbamidomethyl); C47(Carbamidomethyl)	2	51	[]	[]	[]	[]	9999	96.84	PS-008	0	P|000	7029.45	-0.142464	P1	P1	Unmod	P1	P|000 → P1
A	R01	A_R01	TP	344	5938000000	32.4673	0.731954	10.066	7029.6	2.5e-05	2.5e-05	P04553	P1	['P1']	ARYRCCRSQSRSRYYRQRQRSRRRRRRSCQTRRRAMRCCRPRYRPRCRRH	M.ARYR(C)[Carbamidomethylation](C)[Carbamidomethylation]RSQSRSRYYRQRQRSRRRRRRS(C)[Carbamidomethylation]QTRRRAMR(C)[Carbamidomethylation](C)[Carbamidomethylation]RPRYRPR(C)[Carbamidomethylation]RRH.		2	51	[]	[]	[]	[]		30.7585	TP-071	0	P|000	7029.45	-0.142464	P1	P1	Unmod	P1	P|000 → P1
A	R01	A_R01	TP	444	5938000000	32.4673	0.731954	12.8717	7029.6	0.000205	0.000205	P04553	P1	['P1']	ARYRCCRSQSRSRYYRQRQRSRRRRRRSCQTRRRAMRCCRPRYRPRCRRH	M.ARYR(C)[Carbamidomethylation](C)[Carbamidomethylation]RSQSRSRYYRQRQRSRRRRRRS(C)[Carbamidomethylation]QTRRRAMR(C)[Carbamidomethylation](C)[Carbamidomethylation]RPRYRPR(C)[Carbamidomethylation]RRH.		2	51	[]	[]	[]	[]		29.4477	TP-071	0	P|000	7029.45	-0.142464	P1	P1	Unmod	P1	P|000 → P1
B	R03	B_R03	TP	427	5713000000	32.4116	0.938315	12.5487	7029.6	0.000485	0.000485	P04553	P1	['P1']	ARYRCCRSQSRSRYYRQRQRSRRRRRRSCQTRRRAMRCCRPRYRPRCRRH	M.ARYR(C)[Carbamidomethylation](C)[Carbamidomethylation]RSQSRSRYYRQRQRSRRRRRRS(C)[Carbamidomethylation]QTRRRAMR(C)[Carbamidomethylation](C)[Carbamidomethylation]RPRYRPR(C)[Carbamidomethylation]RRH.		2	51	[]	[]	[]	[]		29.5277	TP-071	0	P|000	7029.45	-0.142464	P1	P1	Unmod	P1	P|000 → P1
A	R01	A_R01	TP	276	5938000000	32.4673	0.731954	8.18317	7029.6	0.000775	0.000775	P04553	P1	['P1']	ARYRCCRSQSRSRYYRQRQRSRRRRRRSCQTRRRAMRCCRPRYRPRCRRH	M.ARYR(C)[Carbamidomethylation](C)[Carbamidomethylation]RSQSRSRYYRQRQRSRRRRRRS(C)[Carbamidomethylation]QTRRRAMR(C)[Carbamidomethylation](C)[Carbamidomethylation]RPRYRPR(C)[Carbamidomethylation]RRH.		2	51	[]	[]	[]	[]		30.2286	TP-071	0	P|000	7029.45	-0.142464	P1	P1	Unmod	P1	P|000 → P1
B	R03	B_R03	TP	279	5713000000	32.4116	0.938315	8.3435	7029.6	0.001295	0.001295	P04553	P1	['P1']	ARYRCCRSQSRSRYYRQRQRSRRRRRRSCQTRRRAMRCCRPRYRPRCRRH	M.ARYR(C)[Carbamidomethylation](C)[Carbamidomethylation]RSQSRSRYYRQRQRSRRRRRRS(C)[Carbamidomethylation]QTRRRAMR(C)[Carbamidomethylation](C)[Carbamidomethylation]RPRYRPR(C)[Carbamidomethylation]RRH.		2	51	[]	[]	[]	[]		27.7492	TP-071	0	P|000	7029.45	-0.142464	P1	P1	Unmod	P1	P|000 → P1
B	R03	B_R03	PS	445	343920	18.3917	0.813468	13.0726	7029.6	0.00131853	0.00131853	Sperm protamine P1	P1	['P1']	ARYRCCRSQSRSRYYRQRQRSRRRRRRSCQTRRRAMRCCRPRYRPRCRRH	ARYRccRSQSRSRYYRQRQRSRRRRRRScQTRRRAMRccRPRYRPRcRRH	C5(Carbamidomethyl); C6(Carbamidomethyl); C29(Carbamidomethyl); C38(Carbamidomethyl); C39(Carbamidomethyl); C47(Carbamidomethyl)	2	51	[]	[]	[]	[]	9999	93.11	PS-008	0	P|000	7029.45	-0.142464	P1	P1	Unmod	P1	P|000 → P1
B	R04	B_R04	TP	777	709800000	29.4028	-0.571492	21.6175	7029.6	0.001385	0.001385	P04553	P1	['P1']	ARYRCCRSQSRSRYYRQRQRSRRRRRRSCQTRRRAMRCCRPRYRPRCRRH	M.ARYR(C)[Carbamidomethylation](C)[Carbamidomethylation]RSQSRSRYYRQRQRSRRRRRRS(C)[Carbamidomethylation]QTRRRAMR(C)[Carbamidomethylation](C)[Carbamidomethylation]RPRYRPR(C)[Carbamidomethylation]RRH.		2	51	[]	[]	[]	[]		27.0825	TP-071	0	P|000	7029.45	-0.142464	P1	P1	Unmod	P1	P|000 → P1
A	R01	A_R01	TP	366	5938000000	32.4673	0.731954	10.6448	7029.6	0.001475	0.001475	P04553	P1	['P1']	ARYRCCRSQSRSRYYRQRQRSRRRRRRSCQTRRRAMRCCRPRYRPRCRRH	M.ARYR(C)[Carbamidomethylation](C)[Carbamidomethylation]RSQSRSRYYRQRQRSRRRRRRS(C)[Carbamidomethylation]QTRRRAMR(C)[Carbamidomethylation](C)[Carbamidomethylation]RPRYRPR(C)[Carbamidomethylation]RRH.		2	51	[]	[]	[]	[]		29.8362	TP-071	0	P|000	7029.45	-0.142464	P1	P1	Unmod	P1	P|000 → P1
B	R03	B_R03	TP	447	5713000000	32.4116	0.938315	13.1312	7029.6	0.001565	0.001565	P04553	P1	['P1']	ARYRCCRSQSRSRYYRQRQRSRRRRRRSCQTRRRAMRCCRPRYRPRCRRH	M.ARYR(C)[Carbamidomethylation](C)[Carbamidomethylation]RSQSRSRYYRQRQRSRRRRRRS(C)[Carbamidomethylation]QTRRRAMR(C)[Carbamidomethylation](C)[Carbamidomethylation]RPRYRPR(C)[Carbamidomethylation]RRH.		2	51	[]	[]	[]	[]		28.46	TP-071	0	P|000	7029.45	-0.142464	P1	P1	Unmod	P1	P|000 → P1
A	R01	A_R01	TP	464	5938000000	32.4673	0.731954	13.4547	7029.6	0.001725	0.001725	P04553	P1	['P1']	ARYRCCRSQSRSRYYRQRQRSRRRRRRSCQTRRRAMRCCRPRYRPRCRRH	M.ARYR(C)[Carbamidomethylation](C)[Carbamidomethylation]RSQSRSRYYRQRQRSRRRRRRS(C)[Carbamidomethylation]QTRRRAMR(C)[Carbamidomethylation](C)[Carbamidomethylation]RPRYRPR(C)[Carbamidomethylation]RRH.		2	51	[]	[]	[]	[]		26.9534	TP-071	0	P|000	7029.45	-0.142464	P1	P1	Unmod	P1	P|000 → P1
B	R03	B_R03	TP	357	5713000000	32.4116	0.938315	10.5312	7029.6	0.001895	0.001895	P04553	P1	['P1']	ARYRCCRSQSRSRYYRQRQRSRRRRRRSCQTRRRAMRCCRPRYRPRCRRH	M.ARYR(C)[Carbamidomethylation](C)[Carbamidomethylation]RSQSRSRYYRQRQRSRRRRRRS(C)[Carbamidomethylation]QTRRRAMR(C)[Carbamidomethylation](C)[Carbamidomethylation]RPRYRPR(C)[Carbamidomethylation]RRH.		2	51	[]	[]	[]	[]		29.139	TP-071	0	P|000	7029.45	-0.142464	P1	P1	Unmod	P1	P|000 → P1
B	R04	B_R04	TP	757	709800000	29.4028	-0.571492	21.0295	7029.6	0.002005	0.002005	P04553	P1	['P1']	ARYRCCRSQSRSRYYRQRQRSRRRRRRSCQTRRRAMRCCRPRYRPRCRRH	M.ARYR(C)[Carbamidomethylation](C)[Carbamidomethylation]RSQSRSRYYRQRQRSRRRRRRS(C)[Carbamidomethylation]QTRRRAMR(C)[Carbamidomethylation](C)[Carbamidomethylation]RPRYRPR(C)[Carbamidomethylation]RRH.		2	51	[]	[]	[]	[]		25.9657	TP-071	0	P|000	7029.45	-0.142464	P1	P1	Unmod	P1	P|000 → P1
B	R03	B_R03	TP	469	5713000000	32.4116	0.938315	13.7505	7029.6	0.002095	0.002095	P04553	P1	['P1']	ARYRCCRSQSRSRYYRQRQRSRRRRRRSCQTRRRAMRCCRPRYRPRCRRH	M.ARYR(C)[Carbamidomethylation](C)[Carbamidomethylation]RSQSRSRYYRQRQRSRRRRRRS(C)[Carbamidomethylation]QTRRRAMR(C)[Carbamidomethylation](C)[Carbamidomethylation]RPRYRPR(C)[Carbamidomethylation]RRH.		2	51	[]	[]	[]	[]		26.899	TP-071	0	P|000	7029.45	-0.142464	P1	P1	Unmod	P1	P|000 → P1
A	R01	A_R01	TP	388	5938000000	32.4673	0.731954	11.2567	7029.6	0.002315	0.002315	P04553	P1	['P1']	ARYRCCRSQSRSRYYRQRQRSRRRRRRSCQTRRRAMRCCRPRYRPRCRRH	M.ARYR(C)[Carbamidomethylation](C)[Carbamidomethylation]RSQSRSRYYRQRQRSRRRRRRS(C)[Carbamidomethylation]QTRRRAMR(C)[Carbamidomethylation](C)[Carbamidomethylation]RPRYRPR(C)[Carbamidomethylation]RRH.		2	51	[]	[]	[]	[]		28.646	TP-071	0	P|000	7029.45	-0.142464	P1	P1	Unmod	P1	P|000 → P1
B	R03	B_R03	TP	335	5713000000	32.4116	0.938315	9.91967	7029.6	0.002445	0.002445	P04553	P1	['P1']	ARYRCCRSQSRSRYYRQRQRSRRRRRRSCQTRRRAMRCCRPRYRPRCRRH	M.ARYR(C)[Carbamidomethylation](C)[Carbamidomethylation]RSQSRSRYYRQRQRSRRRRRRS(C)[Carbamidomethylation]QTRRRAMR(C)[Carbamidomethylation](C)[Carbamidomethylation]RPRYRPR(C)[Carbamidomethylation]RRH.		2	51	[]	[]	[]	[]		28.0262	TP-071	0	P|000	7029.45	-0.142464	P1	P1	Unmod	P1	P|000 → P1
B	R03	B_R03	TP	301	5713000000	32.4116	0.938315	8.973	7029.6	0.002475	0.002475	P04553	P1	['P1']	ARYRCCRSQSRSRYYRQRQRSRRRRRRSCQTRRRAMRCCRPRYRPRCRRH	M.ARYR(C)[Carbamidomethylation](C)[Carbamidomethylation]RSQSRSRYYRQRQRSRRRRRRS(C)[Carbamidomethylation]QTRRRAMR(C)[Carbamidomethylation](C)[Carbamidomethylation]RPRYRPR(C)[Carbamidomethylation]RRH.		2	51	[]	[]	[]	[]		28.1692	TP-071	0	P|000	7029.45	-0.142464	P1	P1	Unmod	P1	P|000 → P1
A	R01	A_R01	TP	424	5938000000	32.4673	0.731954	12.286	7029.6	0.002795	0.002795	P04553	P1	['P1']	ARYRCCRSQSRSRYYRQRQRSRRRRRRSCQTRRRAMRCCRPRYRPRCRRH	M.ARYR(C)[Carbamidomethylation](C)[Carbamidomethylation]RSQSRSRYYRQRQRSRRRRRRS(C)[Carbamidomethylation]QTRRRAMR(C)[Carbamidomethylation](C)[Carbamidomethylation]RPRYRPR(C)[Carbamidomethylation]RRH.		2	51	[]	[]	[]	[]		28.303	TP-071	0	P|000	7029.45	-0.142464	P1	P1	Unmod	P1	P|000 → P1
B	R04	B_R04	TP	733	709800000	29.4028	-0.571492	20.3188	7029.6	0.003195	0.003195	P04553	P1	['P1']	ARYRCCRSQSRSRYYRQRQRSRRRRRRSCQTRRRAMRCCRPRYRPRCRRH	M.ARYR(C)[Carbamidomethylation](C)[Carbamidomethylation]RSQSRSRYYRQRQRSRRRRRRS(C)[Carbamidomethylation]QTRRRAMR(C)[Carbamidomethylation](C)[Carbamidomethylation]RPRYRPR(C)[Carbamidomethylation]RRH.		2	51	[]	[]	[]	[]		29.1206	TP-071	0	P|000	7029.45	-0.142464	P1	P1	Unmod	P1	P|000 → P1
B	R04	B_R04	PS	1145	56806.2	15.7938	-0.87877	32.3568	7029.6	0.00331853	0.00331853	Sperm protamine P1	P1	['P1']	ARYRCCRSQSRSRYYRQRQRSRRRRRRSCQTRRRAMRCCRPRYRPRCRRH	ARYRccRSQSRSRYYRQRQRSRRRRRRScQTRRRAMRccRPRYRPRcRRH	C5(Carbamidomethyl); C6(Carbamidomethyl); C29(Carbamidomethyl); C38(Carbamidomethyl); C39(Carbamidomethyl); C47(Carbamidomethyl)	2	51	[]	[]	[]	[]	9999	88.89	PS-008	0	P|000	7029.45	-0.142464	P1	P1	Unmod	P1	P|000 → P1
B	R03	B_R03	TP	345	5713000000	32.4116	0.938315	10.2033	7029.6	0.003405	0.003405	P04553	P1	['P1']	ARYRCCRSQSRSRYYRQRQRSRRRRRRSCQTRRRAMRCCRPRYRPRCRRH	M.ARYR(C)[Carbamidomethylation](C)[Carbamidomethylation]RSQSRSRYYRQRQRSRRRRRRS(C)[Carbamidomethylation]QTRRRAMR(C)[Carbamidomethylation](C)[Carbamidomethylation]RPRYRPR(C)[Carbamidomethylation]RRH.		2	51	[]	[]	[]	[]		28.974	TP-071	0	P|000	7029.45	-0.142464	P1	P1	Unmod	P1	P|000 → P1
A	R02	A_R02	TP	283	4005000000	31.8992	0.655946	8.49217	7029.6	0.003425	0.003425	P04553	P1	['P1']	ARYRCCRSQSRSRYYRQRQRSRRRRRRSCQTRRRAMRCCRPRYRPRCRRH	M.ARYR(C)[Carbamidomethylation](C)[Carbamidomethylation]RSQSRSRYYRQRQRSRRRRRRS(C)[Carbamidomethylation]QTRRRAMR(C)[Carbamidomethylation](C)[Carbamidomethylation]RPRYRPR(C)[Carbamidomethylation]RRH.		2	51	[]	[]	[]	[]		29.9966	TP-071	0	P|000	7029.45	-0.142464	P1	P1	Unmod	P1	P|000 → P1
B	R03	B_R03	TP	367	5713000000	32.4116	0.938315	10.8017	7029.6	0.003685	0.003685	P04553	P1	['P1']	ARYRCCRSQSRSRYYRQRQRSRRRRRRSCQTRRRAMRCCRPRYRPRCRRH	M.ARYR(C)[Carbamidomethylation](C)[Carbamidomethylation]RSQSRSRYYRQRQRSRRRRRRS(C)[Carbamidomethylation]QTRRRAMR(C)[Carbamidomethylation](C)[Carbamidomethylation]RPRYRPR(C)[Carbamidomethylation]RRH.		2	51	[]	[]	[]	[]		27.1789	TP-071	0	P|000	7029.45	-0.142464	P1	P1	Unmod	P1	P|000 → P1
A	R01	A_R01	TP	360	5938000000	32.4673	0.731954	10.491	7029.6	0.004015	0.004015	P04553	P1	['P1']	ARYRCCRSQSRSRYYRQRQRSRRRRRRSCQTRRRAMRCCRPRYRPRCRRH	M.ARYR(C)[Carbamidomethylation](C)[Carbamidomethylation]RSQSRSRYYRQRQRSRRRRRRS(C)[Carbamidomethylation]QTRRRAMR(C)[Carbamidomethylation](C)[Carbamidomethylation]RPRYRPR(C)[Carbamidomethylation]RRH.		2	51	[]	[]	[]	[]		28.1718	TP-071	0	P|000	7029.45	-0.142464	P1	P1	Unmod	P1	P|000 → P1
A	R02	A_R02	TP	301	4005000000	31.8992	0.655946	9.0045	7029.6	0.004325	0.004325	P04553	P1	['P1']	ARYRCCRSQSRSRYYRQRQRSRRRRRRSCQTRRRAMRCCRPRYRPRCRRH	M.ARYR(C)[Carbamidomethylation](C)[Carbamidomethylation]RSQSRSRYYRQRQRSRRRRRRS(C)[Carbamidomethylation]QTRRRAMR(C)[Carbamidomethylation](C)[Carbamidomethylation]RPRYRPR(C)[Carbamidomethylation]RRH.		2	51	[]	[]	[]	[]		27.8769	TP-071	0	P|000	7029.45	-0.142464	P1	P1	Unmod	P1	P|000 → P1
B	R03	B_R03	TP	271	5713000000	32.4116	0.938315	8.11083	7029.6	0.004435	0.004435	P04553	P1	['P1']	ARYRCCRSQSRSRYYRQRQRSRRRRRRSCQTRRRAMRCCRPRYRPRCRRH	M.ARYR(C)[Carbamidomethylation](C)[Carbamidomethylation]RSQSRSRYYRQRQRSRRRRRRS(C)[Carbamidomethylation]QTRRRAMR(C)[Carbamidomethylation](C)[Carbamidomethylation]RPRYRPR(C)[Carbamidomethylation]RRH.		2	51	[]	[]	[]	[]		27.6709	TP-071	0	P|000	7029.45	-0.142464	P1	P1	Unmod	P1	P|000 → P1
A	R01	A_R01	TP	662	5938000000	32.4673	0.731954	18.8235	7029.6	0.004585	0.004585	P04553	P1	['P1']	ARYRCCRSQSRSRYYRQRQRSRRRRRRSCQTRRRAMRCCRPRYRPRCRRH	M.ARYR(C)[Carbamidomethylation](C)[Carbamidomethylation]RSQSRSRYYRQRQRSRRRRRRS(C)[Carbamidomethylation]QTRRRAMR(C)[Carbamidomethylation](C)[Carbamidomethylation]RPRYRPR(C)[Carbamidomethylation]RRH.		2	51	[]	[]	[]	[]		25.2409	TP-071	0	P|000	7029.45	-0.142464	P1	P1	Unmod	P1	P|000 → P1
B	R03	B_R03	PS	293	341068	18.3797	0.80881	8.73	7029.6	0.00471853	0.00471853	Sperm protamine P1	P1	['P1']	ARYRCCRSQSRSRYYRQRQRSRRRRRRSCQTRRRAMRCCRPRYRPRCRRH	ARYRccRSQSRSRYYRQRQRSRRRRRRScQTRRRAMRccRPRYRPRcRRH	C5(Carbamidomethyl); C6(Carbamidomethyl); C29(Carbamidomethyl); C38(Carbamidomethyl); C39(Carbamidomethyl); C47(Carbamidomethyl)	2	51	[]	[]	[]	[]	9999	116.55	PS-008	0	P|000	7029.45	-0.142464	P1	P1	Unmod	P1	P|000 → P1
A	R02	A_R02	PS	199	6290.07	12.6189	-1.58854	5.9828	7029.6	0.00471853	0.00471853	Sperm protamine P1	P1	['P1']	ARYRCCRSQSRSRYYRQRQRSRRRRRRSCQTRRRAMRCCRPRYRPRCRRH	ARYRccRSQSRSRYYRQRQRSRRRRRRScQTRRRAMRccRPRYRPRcRRH	C5(Carbamidomethyl); C6(Carbamidomethyl); C29(Carbamidomethyl); C38(Carbamidomethyl); C39(Carbamidomethyl); C47(Carbamidomethyl)	2	51	[]	[]	[]	[]	9999	21.14	PS-008	0	P|000	7029.45	-0.142464	P1	P1	Unmod	P1	P|000 → P1
A	R01	A_R01	TP	292	5938000000	32.4673	0.731954	8.64733	7029.6	0.004745	0.004745	P04553	P1	['P1']	ARYRCCRSQSRSRYYRQRQRSRRRRRRSCQTRRRAMRCCRPRYRPRCRRH	M.ARYR(C)[Carbamidomethylation](C)[Carbamidomethylation]RSQSRSRYYRQRQRSRRRRRRS(C)[Carbamidomethylation]QTRRRAMR(C)[Carbamidomethylation](C)[Carbamidomethylation]RPRYRPR(C)[Carbamidomethylation]RRH.		2	51	[]	[]	[]	[]		26.862	TP-071	0	P|000	7029.45	-0.142464	P1	P1	Unmod	P1	P|000 → P1
A	R01	A_R01	TP	338	5938000000	32.4673	0.731954	9.9075	7029.6	0.004845	0.004845	P04553	P1	['P1']	ARYRCCRSQSRSRYYRQRQRSRRRRRRSCQTRRRAMRCCRPRYRPRCRRH	M.ARYR(C)[Carbamidomethylation](C)[Carbamidomethylation]RSQSRSRYYRQRQRSRRRRRRS(C)[Carbamidomethylation]QTRRRAMR(C)[Carbamidomethylation](C)[Carbamidomethylation]RPRYRPR(C)[Carbamidomethylation]RRH.		2	51	[]	[]	[]	[]		27.7144	TP-071	0	P|000	7029.45	-0.142464	P1	P1	Unmod	P1	P|000 → P1
A	R02	A_R02	TP	329	4005000000	31.8992	0.655946	9.81017	7029.6	0.004895	0.004895	P04553	P1	['P1']	ARYRCCRSQSRSRYYRQRQRSRRRRRRSCQTRRRAMRCCRPRYRPRCRRH	M.ARYR(C)[Carbamidomethylation](C)[Carbamidomethylation]RSQSRSRYYRQRQRSRRRRRRS(C)[Carbamidomethylation]QTRRRAMR(C)[Carbamidomethylation](C)[Carbamidomethylation]RPRYRPR(C)[Carbamidomethylation]RRH.		2	51	[]	[]	[]	[]		31.9922	TP-071	0	P|000	7029.45	-0.142464	P1	P1	Unmod	P1	P|000 → P1
A	R01	A_R01	TP	404	5938000000	32.4673	0.731954	11.7077	7029.6	0.005165	0.005165	P04553	P1	['P1']	ARYRCCRSQSRSRYYRQRQRSRRRRRRSCQTRRRAMRCCRPRYRPRCRRH	M.ARYR(C)[Carbamidomethylation](C)[Carbamidomethylation]RSQSRSRYYRQRQRSRRRRRRS(C)[Carbamidomethylation]QTRRRAMR(C)[Carbamidomethylation](C)[Carbamidomethylation]RPRYRPR(C)[Carbamidomethylation]RRH.		2	51	[]	[]	[]	[]		27.5942	TP-071	0	P|000	7029.45	-0.142464	P1	P1	Unmod	P1	P|000 → P1
A	R02	A_R02	TP	281	4005000000	31.8992	0.655946	8.43417	7029.6	0.005395	0.005395	P04553	P1	['P1']	ARYRCCRSQSRSRYYRQRQRSRRRRRRSCQTRRRAMRCCRPRYRPRCRRH	M.ARYR(C)[Carbamidomethylation](C)[Carbamidomethylation]RSQSRSRYYRQRQRSRRRRRRS(C)[Carbamidomethylation]QTRRRAMR(C)[Carbamidomethylation](C)[Carbamidomethylation]RPRYRPR(C)[Carbamidomethylation]RRH.		2	51	[]	[]	[]	[]		28.3522	TP-071	0	P|000	7029.45	-0.142464	P1	P1	Unmod	P1	P|000 → P1
A	R01	A_R01	TP	316	5938000000	32.4673	0.731954	9.32133	7029.6	0.005425	0.005425	P04553	P1	['P1']	ARYRCCRSQSRSRYYRQRQRSRRRRRRSCQTRRRAMRCCRPRYRPRCRRH	M.ARYR(C)[Carbamidomethylation](C)[Carbamidomethylation]RSQSRSRYYRQRQRSRRRRRRS(C)[Carbamidomethylation]QTRRRAMR(C)[Carbamidomethylation](C)[Carbamidomethylation]RPRYRPR(C)[Carbamidomethylation]RRH.		2	51	[]	[]	[]	[]		27.8039	TP-071	0	P|000	7029.45	-0.142464	P1	P1	Unmod	P1	P|000 → P1
B	R03	B_R03	PS	43	21185	14.3708	-0.745588	1.2541	7029.6	0.00551853	0.00551853	Sperm protamine P1	P1	['P1']	ARYRCCRSQSRSRYYRQRQRSRRRRRRSCQTRRRAMRCCRPRYRPRCRRH	ARYRccRSQSRSRYYRQRQRSRRRRRRScQTRRRAMRccRPRYRPRcRRH	C5(Carbamidomethyl); C6(Carbamidomethyl); C29(Carbamidomethyl); C38(Carbamidomethyl); C39(Carbamidomethyl); C47(Carbamidomethyl)	2	51	[]	[]	[]	[]	9999	61.68	PS-008	0	P|000	7029.45	-0.142464	P1	P1	Unmod	P1	P|000 → P1
B	R03	B_R03	PS	357	812688	19.6323	1.2945	10.5312	7029.6	0.00551853	0.00551853	Sperm protamine P1	P1	['P1']	ARYRCCRSQSRSRYYRQRQRSRRRRRRSCQTRRRAMRCCRPRYRPRCRRH	ARYRccRSQSRSRYYRQRQRSRRRRRRScQTRRRAMRccRPRYRPRcRRH	C5(Carbamidomethyl); C6(Carbamidomethyl); C29(Carbamidomethyl); C38(Carbamidomethyl); C39(Carbamidomethyl); C47(Carbamidomethyl)	2	51	[]	[]	[]	[]	9999	107.43	PS-008	0	P|000	7029.45	-0.142464	P1	P1	Unmod	P1	P|000 → P1
B	R03	B_R03	TP	397	5713000000	32.4116	0.938315	11.6733	7029.6	0.005595	0.005595	P04553	P1	['P1']	ARYRCCRSQSRSRYYRQRQRSRRRRRRSCQTRRRAMRCCRPRYRPRCRRH	M.ARYR(C)[Carbamidomethylation](C)[Carbamidomethylation]RSQSRSRYYRQRQRSRRRRRRS(C)[Carbamidomethylation]QTRRRAMR(C)[Carbamidomethylation](C)[Carbamidomethylation]RPRYRPR(C)[Carbamidomethylation]RRH.		2	51	[]	[]	[]	[]		30.5624	TP-071	0	P|000	7029.45	-0.142464	P1	P1	Unmod	P1	P|000 → P1
B	R03	B_R03	TP	535	5713000000	32.4116	0.938315	15.3955	7029.6	0.005785	0.005785	P04553	P1	['P1']	ARYRCCRSQSRSRYYRQRQRSRRRRRRSCQTRRRAMRCCRPRYRPRCRRH	M.ARYR(C)[Carbamidomethylation](C)[Carbamidomethylation]RSQSRSRYYRQRQRSRRRRRRS(C)[Carbamidomethylation]QTRRRAMR(C)[Carbamidomethylation](C)[Carbamidomethylation]RPRYRPR(C)[Carbamidomethylation]RRH.		2	51	[]	[]	[]	[]		27.3768	TP-071	0	P|000	7029.45	-0.142464	P1	P1	Unmod	P1	P|000 → P1
A	R02	A_R02	TP	407	4005000000	31.8992	0.655946	12.055	7029.6	0.005795	0.005795	P04553	P1	['P1']	ARYRCCRSQSRSRYYRQRQRSRRRRRRSCQTRRRAMRCCRPRYRPRCRRH	M.ARYR(C)[Carbamidomethylation](C)[Carbamidomethylation]RSQSRSRYYRQRQRSRRRRRRS(C)[Carbamidomethylation]QTRRRAMR(C)[Carbamidomethylation](C)[Carbamidomethylation]RPRYRPR(C)[Carbamidomethylation]RRH.		2	51	[]	[]	[]	[]		29.2315	TP-071	0	P|000	7029.45	-0.142464	P1	P1	Unmod	P1	P|000 → P1
A	R02	A_R02	TP	343	4005000000	31.8992	0.655946	10.2095	7029.6	0.005815	0.005815	P04553	P1	['P1']	ARYRCCRSQSRSRYYRQRQRSRRRRRRSCQTRRRAMRCCRPRYRPRCRRH	M.ARYR(C)[Carbamidomethylation](C)[Carbamidomethylation]RSQSRSRYYRQRQRSRRRRRRS(C)[Carbamidomethylation]QTRRRAMR(C)[Carbamidomethylation](C)[Carbamidomethylation]RPRYRPR(C)[Carbamidomethylation]RRH.		2	51	[]	[]	[]	[]		27.6275	TP-071	0	P|000	7029.45	-0.142464	P1	P1	Unmod	P1	P|000 → P1
A	R01	A_R01	TP	780	5938000000	32.4673	0.731954	22.2867	7029.6	0.005875	0.005875	P04553	P1	['P1']	ARYRCCRSQSRSRYYRQRQRSRRRRRRSCQTRRRAMRCCRPRYRPRCRRH	M.ARYR(C)[Carbamidomethylation](C)[Carbamidomethylation]RSQSRSRYYRQRQRSRRRRRRS(C)[Carbamidomethylation]QTRRRAMR(C)[Carbamidomethylation](C)[Carbamidomethylation]RPRYRPR(C)[Carbamidomethylation]RRH.		2	51	[]	[]	[]	[]		28.0168	TP-071	0	P|000	7029.45	-0.142464	P1	P1	Unmod	P1	P|000 → P1
A	R02	A_R02	TP	387	4005000000	31.8992	0.655946	11.468	7029.6	0.006135	0.006135	P04553	P1	['P1']	ARYRCCRSQSRSRYYRQRQRSRRRRRRSCQTRRRAMRCCRPRYRPRCRRH	M.ARYR(C)[Carbamidomethylation](C)[Carbamidomethylation]RSQSRSRYYRQRQRSRRRRRRS(C)[Carbamidomethylation]QTRRRAMR(C)[Carbamidomethylation](C)[Carbamidomethylation]RPRYRPR(C)[Carbamidomethylation]RRH.		2	51	[]	[]	[]	[]		29.0657	TP-071	0	P|000	7029.45	-0.142464	P1	P1	Unmod	P1	P|000 → P1
A	R02	A_R02	TP	427	4005000000	31.8992	0.655946	12.6387	7029.6	0.006235	0.006235	P04553	P1	['P1']	ARYRCCRSQSRSRYYRQRQRSRRRRRRSCQTRRRAMRCCRPRYRPRCRRH	M.ARYR(C)[Carbamidomethylation](C)[Carbamidomethylation]RSQSRSRYYRQRQRSRRRRRRS(C)[Carbamidomethylation]QTRRRAMR(C)[Carbamidomethylation](C)[Carbamidomethylation]RPRYRPR(C)[Carbamidomethylation]RRH.		2	51	[]	[]	[]	[]		26.1939	TP-071	0	P|000	7029.45	-0.142464	P1	P1	Unmod	P1	P|000 → P1
A	R02	A_R02	TP	261	4005000000	31.8992	0.655946	7.8555	7029.6	0.006365	0.006365	P04553	P1	['P1']	ARYRCCRSQSRSRYYRQRQRSRRRRRRSCQTRRRAMRCCRPRYRPRCRRH	M.ARYR(C)[Carbamidomethylation](C)[Carbamidomethylation]RSQSRSRYYRQRQRSRRRRRRS(C)[Carbamidomethylation]QTRRRAMR(C)[Carbamidomethylation](C)[Carbamidomethylation]RPRYRPR(C)[Carbamidomethylation]RRH.		2	51	[]	[]	[]	[]		24.9747	TP-071	0	P|000	7029.45	-0.142464	P1	P1	Unmod	P1	P|000 → P1
B	R04	B_R04	TP	987	709800000	29.4028	-0.571492	27.7218	7029.6	0.006575	0.006575	P04553	P1	['P1']	ARYRCCRSQSRSRYYRQRQRSRRRRRRSCQTRRRAMRCCRPRYRPRCRRH	M.ARYR(C)[Carbamidomethylation](C)[Carbamidomethylation]RSQSRSRYYRQRQRSRRRRRRS(C)[Carbamidomethylation]QTRRRAMR(C)[Carbamidomethylation](C)[Carbamidomethylation]RPRYRPR(C)[Carbamidomethylation]RRH.		2	51	[]	[]	[]	[]		24.1602	TP-071	0	P|000	7029.45	-0.142464	P1	P1	Unmod	P1	P|000 → P1
B	R03	B_R03	TP	267	5713000000	32.4116	0.938315	7.995	7029.6	0.006775	0.006775	P04553	P1	['P1']	ARYRCCRSQSRSRYYRQRQRSRRRRRRSCQTRRRAMRCCRPRYRPRCRRH	M.ARYR(C)[Carbamidomethylation](C)[Carbamidomethylation]RSQSRSRYYRQRQRSRRRRRRS(C)[Carbamidomethylation]QTRRRAMR(C)[Carbamidomethylation](C)[Carbamidomethylation]RPRYRPR(C)[Carbamidomethylation]RRH.		2	51	[]	[]	[]	[]		30.2891	TP-071	0	P|000	7029.45	-0.142464	P1	P1	Unmod	P1	P|000 → P1
A	R01	A_R01	TP	336	5938000000	32.4673	0.731954	9.86117	7029.6	0.006805	0.006805	P04553	P1	['P1']	ARYRCCRSQSRSRYYRQRQRSRRRRRRSCQTRRRAMRCCRPRYRPRCRRH	M.ARYR(C)[Carbamidomethylation](C)[Carbamidomethylation]RSQSRSRYYRQRQRSRRRRRRS(C)[Carbamidomethylation]QTRRRAMR(C)[Carbamidomethylation](C)[Carbamidomethylation]RPRYRPR(C)[Carbamidomethylation]RRH.		2	51	[]	[]	[]	[]		26.0298	TP-071	0	P|000	7029.45	-0.142464	P1	P1	Unmod	P1	P|000 → P1
A	R01	A_R01	TP	342	5938000000	32.4673	0.731954	10.0083	7029.6	0.006895	0.006895	P04553	P1	['P1']	ARYRCCRSQSRSRYYRQRQRSRRRRRRSCQTRRRAMRCCRPRYRPRCRRH	M.ARYR(C)[Carbamidomethylation](C)[Carbamidomethylation]RSQSRSRYYRQRQRSRRRRRRS(C)[Carbamidomethylation]QTRRRAMR(C)[Carbamidomethylation](C)[Carbamidomethylation]RPRYRPR(C)[Carbamidomethylation]RRH.		2	51	[]	[]	[]	[]		32.5235	TP-071	0	P|000	7029.45	-0.142464	P1	P1	Unmod	P1	P|000 → P1
A	R01	A_R01	TP	364	5938000000	32.4673	0.731954	10.5867	7029.6	0.006905	0.006905	P04553	P1	['P1']	ARYRCCRSQSRSRYYRQRQRSRRRRRRSCQTRRRAMRCCRPRYRPRCRRH	M.ARYR(C)[Carbamidomethylation](C)[Carbamidomethylation]RSQSRSRYYRQRQRSRRRRRRS(C)[Carbamidomethylation]QTRRRAMR(C)[Carbamidomethylation](C)[Carbamidomethylation]RPRYRPR(C)[Carbamidomethylation]RRH.		2	51	[]	[]	[]	[]		29.2017	TP-071	0	P|000	7029.45	-0.142464	P1	P1	Unmod	P1	P|000 → P1
A	R01	A_R01	TP	690	5938000000	32.4673	0.731954	19.6485	7029.6	0.007105	0.007105	P04553	P1	['P1']	ARYRCCRSQSRSRYYRQRQRSRRRRRRSCQTRRRAMRCCRPRYRPRCRRH	M.ARYR(C)[Carbamidomethylation](C)[Carbamidomethylation]RSQSRSRYYRQRQRSRRRRRRS(C)[Carbamidomethylation]QTRRRAMR(C)[Carbamidomethylation](C)[Carbamidomethylation]RPRYRPR(C)[Carbamidomethylation]RRH.		2	51	[]	[]	[]	[]		24.0618	TP-071	0	P|000	7029.45	-0.142464	P1	P1	Unmod	P1	P|000 → P1
B	R03	B_R03	TP	377	5713000000	32.4116	0.938315	11.0867	7029.6	0.007245	0.007245	P04553	P1	['P1']	ARYRCCRSQSRSRYYRQRQRSRRRRRRSCQTRRRAMRCCRPRYRPRCRRH	M.ARYR(C)[Carbamidomethylation](C)[Carbamidomethylation]RSQSRSRYYRQRQRSRRRRRRS(C)[Carbamidomethylation]QTRRRAMR(C)[Carbamidomethylation](C)[Carbamidomethylation]RPRYRPR(C)[Carbamidomethylation]RRH.		2	51	[]	[]	[]	[]		28.1937	TP-071	0	P|000	7029.45	-0.142464	P1	P1	Unmod	P1	P|000 → P1
A	R02	A_R02	TP	321	4005000000	31.8992	0.655946	9.58567	7029.6	0.007265	0.007265	P04553	P1	['P1']	ARYRCCRSQSRSRYYRQRQRSRRRRRRSCQTRRRAMRCCRPRYRPRCRRH	M.ARYR(C)[Carbamidomethylation](C)[Carbamidomethylation]RSQSRSRYYRQRQRSRRRRRRS(C)[Carbamidomethylation]QTRRRAMR(C)[Carbamidomethylation](C)[Carbamidomethylation]RPRYRPR(C)[Carbamidomethylation]RRH.		2	51	[]	[]	[]	[]		29.0498	TP-071	0	P|000	7029.45	-0.142464	P1	P1	Unmod	P1	P|000 → P1
A	R01	A_R01	PS	866	73829.3	16.1719	-0.427387	24.7969	7029.6	0.00731853	0.00731853	Sperm protamine P1	P1	['P1']	ARYRCCRSQSRSRYYRQRQRSRRRRRRSCQTRRRAMRCCRPRYRPRCRRH	ARYRccRSQSRSRYYRQRQRSRRRRRRScQTRRRAMRccRPRYRPRcRRH	C5(Carbamidomethyl); C6(Carbamidomethyl); C29(Carbamidomethyl); C38(Carbamidomethyl); C39(Carbamidomethyl); C47(Carbamidomethyl)	2	51	[]	[]	[]	[]	9999	114.09	PS-008	0	P|000	7029.45	-0.142464	P1	P1	Unmod	P1	P|000 → P1
B	R03	B_R03	TP	355	5713000000	32.4116	0.938315	10.484	7029.6	0.007345	0.007345	P04553	P1	['P1']	ARYRCCRSQSRSRYYRQRQRSRRRRRRSCQTRRRAMRCCRPRYRPRCRRH	M.ARYR(C)[Carbamidomethylation](C)[Carbamidomethylation]RSQSRSRYYRQRQRSRRRRRRS(C)[Carbamidomethylation]QTRRRAMR(C)[Carbamidomethylation](C)[Carbamidomethylation]RPRYRPR(C)[Carbamidomethylation]RRH.		2	51	[]	[]	[]	[]		28.8183	TP-071	0	P|000	7029.45	-0.142464	P1	P1	Unmod	P1	P|000 → P1
B	R04	B_R04	TP	759	709800000	29.4028	-0.571492	21.0885	7029.6	0.007415	0.007415	P04553	P1	['P1']	ARYRCCRSQSRSRYYRQRQRSRRRRRRSCQTRRRAMRCCRPRYRPRCRRH	M.ARYR(C)[Carbamidomethylation](C)[Carbamidomethylation]RSQSRSRYYRQRQRSRRRRRRS(C)[Carbamidomethylation]QTRRRAMR(C)[Carbamidomethylation](C)[Carbamidomethylation]RPRYRPR(C)[Carbamidomethylation]RRH.		2	51	[]	[]	[]	[]		25.1158	TP-071	0	P|000	7029.45	-0.142464	P1	P1	Unmod	P1	P|000 → P1
A	R01	A_R01	TP	358	5938000000	32.4673	0.731954	10.4447	7029.6	0.007425	0.007425	P04553	P1	['P1']	ARYRCCRSQSRSRYYRQRQRSRRRRRRSCQTRRRAMRCCRPRYRPRCRRH	M.ARYR(C)[Carbamidomethylation](C)[Carbamidomethylation]RSQSRSRYYRQRQRSRRRRRRS(C)[Carbamidomethylation]QTRRRAMR(C)[Carbamidomethylation](C)[Carbamidomethylation]RPRYRPR(C)[Carbamidomethylation]RRH.		2	51	[]	[]	[]	[]		28.9217	TP-071	0	P|000	7029.45	-0.142464	P1	P1	Unmod	P1	P|000 → P1
B	R04	B_R04	TP	1261	709800000	29.4028	-0.571492	35.7472	7029.6	0.007515	0.007515	P04553	P1	['P1']	ARYRCCRSQSRSRYYRQRQRSRRRRRRSCQTRRRAMRCCRPRYRPRCRRH	M.ARYR(C)[Carbamidomethylation](C)[Carbamidomethylation]RSQSRSRYYRQRQRSRRRRRRS(C)[Carbamidomethylation]QTRRRAMR(C)[Carbamidomethylation](C)[Carbamidomethylation]RPRYRPR(C)[Carbamidomethylation]RRH.		2	51	[]	[]	[]	[]		24.2922	TP-071	0	P|000	7029.45	-0.142464	P1	P1	Unmod	P1	P|000 → P1
A	R02	A_R02	PS	779	90657.9	16.4681	0.00377301	22.4717	7029.6	0.00751853	0.00751853	Sperm protamine P1	P1	['P1']	ARYRCCRSQSRSRYYRQRQRSRRRRRRSCQTRRRAMRCCRPRYRPRCRRH	ARYRccRSQSRSRYYRQRQRSRRRRRRScQTRRRAMRccRPRYRPRcRRH	C5(Carbamidomethyl); C6(Carbamidomethyl); C29(Carbamidomethyl); C38(Carbamidomethyl); C39(Carbamidomethyl); C47(Carbamidomethyl)	2	51	[]	[]	[]	[]	9999	82.71	PS-008	0	P|000	7029.45	-0.142464	P1	P1	Unmod	P1	P|000 → P1
A	R01	A_R01	TP	426	5938000000	32.4673	0.731954	12.342	7029.6	0.007795	0.007795	P04553	P1	['P1']	ARYRCCRSQSRSRYYRQRQRSRRRRRRSCQTRRRAMRCCRPRYRPRCRRH	M.ARYR(C)[Carbamidomethylation](C)[Carbamidomethylation]RSQSRSRYYRQRQRSRRRRRRS(C)[Carbamidomethylation]QTRRRAMR(C)[Carbamidomethylation](C)[Carbamidomethylation]RPRYRPR(C)[Carbamidomethylation]RRH.		2	51	[]	[]	[]	[]		29.1394	TP-071	0	P|000	7029.45	-0.142464	P1	P1	Unmod	P1	P|000 → P1
A	R01	A_R01	TP	284	5938000000	32.4673	0.731954	8.41517	7029.6	0.007845	0.007845	P04553	P1	['P1']	ARYRCCRSQSRSRYYRQRQRSRRRRRRSCQTRRRAMRCCRPRYRPRCRRH	M.ARYR(C)[Carbamidomethylation](C)[Carbamidomethylation]RSQSRSRYYRQRQRSRRRRRRS(C)[Carbamidomethylation]QTRRRAMR(C)[Carbamidomethylation](C)[Carbamidomethylation]RPRYRPR(C)[Carbamidomethylation]RRH.		2	51	[]	[]	[]	[]		29.6679	TP-071	0	P|000	7029.45	-0.142464	P1	P1	Unmod	P1	P|000 → P1
A	R01	A_R01	TP	1090	5938000000	32.4673	0.731954	31.3228	7029.6	0.008055	0.008055	P04553	P1	['P1']	ARYRCCRSQSRSRYYRQRQRSRRRRRRSCQTRRRAMRCCRPRYRPRCRRH	M.ARYR(C)[Carbamidomethylation](C)[Carbamidomethylation]RSQSRSRYYRQRQRSRRRRRRS(C)[Carbamidomethylation]QTRRRAMR(C)[Carbamidomethylation](C)[Carbamidomethylation]RPRYRPR(C)[Carbamidomethylation]RRH.		2	51	[]	[]	[]	[]		25.4989	TP-071	0	P|000	7029.45	-0.142464	P1	P1	Unmod	P1	P|000 → P1
A	R01	A_R01	TP	1334	5938000000	32.4673	0.731954	38.4127	7029.6	0.008275	0.008275	P04553	P1	['P1']	ARYRCCRSQSRSRYYRQRQRSRRRRRRSCQTRRRAMRCCRPRYRPRCRRH	M.ARYR(C)[Carbamidomethylation](C)[Carbamidomethylation]RSQSRSRYYRQRQRSRRRRRRS(C)[Carbamidomethylation]QTRRRAMR(C)[Carbamidomethylation](C)[Carbamidomethylation]RPRYRPR(C)[Carbamidomethylation]RRH.		2	51	[]	[]	[]	[]		23.0366	TP-071	0	P|000	7029.45	-0.142464	P1	P1	Unmod	P1	P|000 → P1
B	R03	B_R03	TP	417	5713000000	32.4116	0.938315	12.251	7029.6	0.008595	0.008595	P04553	P1	['P1']	ARYRCCRSQSRSRYYRQRQRSRRRRRRSCQTRRRAMRCCRPRYRPRCRRH	M.ARYR(C)[Carbamidomethylation](C)[Carbamidomethylation]RSQSRSRYYRQRQRSRRRRRRS(C)[Carbamidomethylation]QTRRRAMR(C)[Carbamidomethylation](C)[Carbamidomethylation]RPRYRPR(C)[Carbamidomethylation]RRH.		2	51	[]	[]	[]	[]		27.1268	TP-071	0	P|000	7029.45	-0.142464	P1	P1	Unmod	P1	P|000 → P1
A	R01	A_R01	TP	306	5938000000	32.4673	0.731954	9.04467	7029.6	0.008615	0.008615	P04553	P1	['P1']	ARYRCCRSQSRSRYYRQRQRSRRRRRRSCQTRRRAMRCCRPRYRPRCRRH	M.ARYR(C)[Carbamidomethylation](C)[Carbamidomethylation]RSQSRSRYYRQRQRSRRRRRRS(C)[Carbamidomethylation]QTRRRAMR(C)[Carbamidomethylation](C)[Carbamidomethylation]RPRYRPR(C)[Carbamidomethylation]RRH.		2	51	[]	[]	[]	[]		27.9025	TP-071	0	P|000	7029.45	-0.142464	P1	P1	Unmod	P1	P|000 → P1
B	R03	B_R03	TP	176	5713000000	32.4116	0.938315	5.26317	7029.6	0.008655	0.008655	P04553	P1	['P1']	ARYRCCRSQSRSRYYRQRQRSRRRRRRSCQTRRRAMRCCRPRYRPRCRRH	M.ARYR(C)[Carbamidomethylation](C)[Carbamidomethylation]RSQSRSRYYRQRQRSRRRRRRS(C)[Carbamidomethylation]QTRRRAMR(C)[Carbamidomethylation](C)[Carbamidomethylation]RPRYRPR(C)[Carbamidomethylation]RRH.		2	51	[]	[]	[]	[]		22.707	TP-071	0	P|000	7029.45	-0.142464	P1	P1	Unmod	P1	P|000 → P1
A	R01	A_R01	TP	294	5938000000	32.4673	0.731954	8.69767	7029.6	0.008855	0.008855	P04553	P1	['P1']	ARYRCCRSQSRSRYYRQRQRSRRRRRRSCQTRRRAMRCCRPRYRPRCRRH	M.ARYR(C)[Carbamidomethylation](C)[Carbamidomethylation]RSQSRSRYYRQRQRSRRRRRRS(C)[Carbamidomethylation]QTRRRAMR(C)[Carbamidomethylation](C)[Carbamidomethylation]RPRYRPR(C)[Carbamidomethylation]RRH.		2	51	[]	[]	[]	[]		29.0728	TP-071	0	P|000	7029.45	-0.142464	P1	P1	Unmod	P1	P|000 → P1
B	R03	B_R03	TP	333	5713000000	32.4116	0.938315	9.87317	7029.6	0.008865	0.008865	P04553	P1	['P1']	ARYRCCRSQSRSRYYRQRQRSRRRRRRSCQTRRRAMRCCRPRYRPRCRRH	M.ARYR(C)[Carbamidomethylation](C)[Carbamidomethylation]RSQSRSRYYRQRQRSRRRRRRS(C)[Carbamidomethylation]QTRRRAMR(C)[Carbamidomethylation](C)[Carbamidomethylation]RPRYRPR(C)[Carbamidomethylation]RRH.		2	51	[]	[]	[]	[]		28.5637	TP-071	0	P|000	7029.45	-0.142464	P1	P1	Unmod	P1	P|000 → P1
A	R01	A_R01	TP	402	5938000000	32.4673	0.731954	11.6607	7029.6	0.009005	0.009005	P04553	P1	['P1']	ARYRCCRSQSRSRYYRQRQRSRRRRRRSCQTRRRAMRCCRPRYRPRCRRH	M.ARYR(C)[Carbamidomethylation](C)[Carbamidomethylation]RSQSRSRYYRQRQRSRRRRRRS(C)[Carbamidomethylation]QTRRRAMR(C)[Carbamidomethylation](C)[Carbamidomethylation]RPRYRPR(C)[Carbamidomethylation]RRH.		2	51	[]	[]	[]	[]		27.4874	TP-071	0	P|000	7029.45	-0.142464	P1	P1	Unmod	P1	P|000 → P1
B	R03	B_R03	TP	289	5713000000	32.4116	0.938315	8.624	7029.61	0.009345	0.009345	P04553	P1	['P1']	ARYRCCRSQSRSRYYRQRQRSRRRRRRSCQTRRRAMRCCRPRYRPRCRRH	M.ARYR(C)[Carbamidomethylation](C)[Carbamidomethylation]RSQSRSRYYRQRQRSRRRRRRS(C)[Carbamidomethylation]QTRRRAMR(C)[Carbamidomethylation](C)[Carbamidomethylation]RPRYRPR(C)[Carbamidomethylation]RRH.		2	51	[]	[]	[]	[]		27.451	TP-071	0	P|000	7029.45	-0.142464	P1	P1	Unmod	P1	P|000 → P1
A	R01	A_R01	TP	274	5938000000	32.4673	0.731954	8.12533	7029.61	0.009525	0.009525	P04553	P1	['P1']	ARYRCCRSQSRSRYYRQRQRSRRRRRRSCQTRRRAMRCCRPRYRPRCRRH	M.ARYR(C)[Carbamidomethylation](C)[Carbamidomethylation]RSQSRSRYYRQRQRSRRRRRRS(C)[Carbamidomethylation]QTRRRAMR(C)[Carbamidomethylation](C)[Carbamidomethylation]RPRYRPR(C)[Carbamidomethylation]RRH.		2	51	[]	[]	[]	[]		28.5948	TP-071	0	P|000	7029.45	-0.142464	P1	P1	Unmod	P1	P|000 → P1
A	R02	A_R02	TP	279	4005000000	31.8992	0.655946	8.37717	7029.61	0.009565	0.009565	P04553	P1	['P1']	ARYRCCRSQSRSRYYRQRQRSRRRRRRSCQTRRRAMRCCRPRYRPRCRRH	M.ARYR(C)[Carbamidomethylation](C)[Carbamidomethylation]RSQSRSRYYRQRQRSRRRRRRS(C)[Carbamidomethylation]QTRRRAMR(C)[Carbamidomethylation](C)[Carbamidomethylation]RPRYRPR(C)[Carbamidomethylation]RRH.		2	51	[]	[]	[]	[]		28.9234	TP-071	0	P|000	7029.45	-0.142464	P1	P1	Unmod	P1	P|000 → P1
A	R02	A_R02	TP	297	4005000000	31.8992	0.655946	8.89883	7029.61	0.009595	0.009595	P04553	P1	['P1']	ARYRCCRSQSRSRYYRQRQRSRRRRRRSCQTRRRAMRCCRPRYRPRCRRH	M.ARYR(C)[Carbamidomethylation](C)[Carbamidomethylation]RSQSRSRYYRQRQRSRRRRRRS(C)[Carbamidomethylation]QTRRRAMR(C)[Carbamidomethylation](C)[Carbamidomethylation]RPRYRPR(C)[Carbamidomethylation]RRH.		2	51	[]	[]	[]	[]		29.3217	TP-071	0	P|000	7029.45	-0.142464	P1	P1	Unmod	P1	P|000 → P1
B	R03	B_R03	TP	218	5713000000	32.4116	0.938315	6.52983	7029.61	0.009755	0.009755	P04553	P1	['P1']	ARYRCCRSQSRSRYYRQRQRSRRRRRRSCQTRRRAMRCCRPRYRPRCRRH	M.ARYR(C)[Carbamidomethylation](C)[Carbamidomethylation]RSQSRSRYYRQRQRSRRRRRRS(C)[Carbamidomethylation]QTRRRAMR(C)[Carbamidomethylation](C)[Carbamidomethylation]RPRYRPR(C)[Carbamidomethylation]RRH.		2	51	[]	[]	[]	[]		19.5345	TP-071	0	P|000	7029.45	-0.142464	P1	P1	Unmod	P1	P|000 → P1
A	R01	A_R01	TP	314	5938000000	32.4673	0.731954	9.27317	7029.61	0.010105	0.010105	P04553	P1	['P1']	ARYRCCRSQSRSRYYRQRQRSRRRRRRSCQTRRRAMRCCRPRYRPRCRRH	M.ARYR(C)[Carbamidomethylation](C)[Carbamidomethylation]RSQSRSRYYRQRQRSRRRRRRS(C)[Carbamidomethylation]QTRRRAMR(C)[Carbamidomethylation](C)[Carbamidomethylation]RPRYRPR(C)[Carbamidomethylation]RRH.		2	51	[]	[]	[]	[]		25.1145	TP-071	0	P|000	7029.45	-0.142464	P1	P1	Unmod	P1	P|000 → P1
A	R02	A_R02	TP	259	4005000000	31.8992	0.655946	7.79717	7029.61	0.010445	0.010445	P04553	P1	['P1']	ARYRCCRSQSRSRYYRQRQRSRRRRRRSCQTRRRAMRCCRPRYRPRCRRH	M.ARYR(C)[Carbamidomethylation](C)[Carbamidomethylation]RSQSRSRYYRQRQRSRRRRRRS(C)[Carbamidomethylation]QTRRRAMR(C)[Carbamidomethylation](C)[Carbamidomethylation]RPRYRPR(C)[Carbamidomethylation]RRH.		2	51	[]	[]	[]	[]		23.6609	TP-071	0	P|000	7029.45	-0.142464	P1	P1	Unmod	P1	P|000 → P1
A	R02	A_R02	TP	1215	4005000000	31.8992	0.655946	35.1613	7029.61	0.010565	0.010565	P04553	P1	['P1']	ARYRCCRSQSRSRYYRQRQRSRRRRRRSCQTRRRAMRCCRPRYRPRCRRH	M.ARYR(C)[Carbamidomethylation](C)[Carbamidomethylation]RSQSRSRYYRQRQRSRRRRRRS(C)[Carbamidomethylation]QTRRRAMR(C)[Carbamidomethylation](C)[Carbamidomethylation]RPRYRPR(C)[Carbamidomethylation]RRH.		2	51	[]	[]	[]	[]		24.5267	TP-071	0	P|000	7029.45	-0.142464	P1	P1	Unmod	P1	P|000 → P1
A	R02	A_R02	TP	277	4005000000	31.8992	0.655946	8.31917	7029.61	0.010795	0.010795	P04553	P1	['P1']	ARYRCCRSQSRSRYYRQRQRSRRRRRRSCQTRRRAMRCCRPRYRPRCRRH	M.ARYR(C)[Carbamidomethylation](C)[Carbamidomethylation]RSQSRSRYYRQRQRSRRRRRRS(C)[Carbamidomethylation]QTRRRAMR(C)[Carbamidomethylation](C)[Carbamidomethylation]RPRYRPR(C)[Carbamidomethylation]RRH.		2	51	[]	[]	[]	[]		26.1989	TP-071	0	P|000	7029.45	-0.142464	P1	P1	Unmod	P1	P|000 → P1
A	R02	A_R02	TP	363	4005000000	31.8992	0.655946	10.7855	7029.61	0.010985	0.010985	P04553	P1	['P1']	ARYRCCRSQSRSRYYRQRQRSRRRRRRSCQTRRRAMRCCRPRYRPRCRRH	M.ARYR(C)[Carbamidomethylation](C)[Carbamidomethylation]RSQSRSRYYRQRQRSRRRRRRS(C)[Carbamidomethylation]QTRRRAMR(C)[Carbamidomethylation](C)[Carbamidomethylation]RPRYRPR(C)[Carbamidomethylation]RRH.		2	51	[]	[]	[]	[]		27.3339	TP-071	0	P|000	7029.45	-0.142464	P1	P1	Unmod	P1	P|000 → P1
A	R02	A_R02	TP	347	4005000000	31.8992	0.655946	10.3165	7029.61	0.011075	0.011075	P04553	P1	['P1']	ARYRCCRSQSRSRYYRQRQRSRRRRRRSCQTRRRAMRCCRPRYRPRCRRH	M.ARYR(C)[Carbamidomethylation](C)[Carbamidomethylation]RSQSRSRYYRQRQRSRRRRRRS(C)[Carbamidomethylation]QTRRRAMR(C)[Carbamidomethylation](C)[Carbamidomethylation]RPRYRPR(C)[Carbamidomethylation]RRH.		2	51	[]	[]	[]	[]		28.5437	TP-071	0	P|000	7029.45	-0.142464	P1	P1	Unmod	P1	P|000 → P1
B	R03	B_R03	PS	66	22677.2	14.469	-0.707511	1.945	7029.61	0.0112185	0.0112185	Sperm protamine P1	P1	['P1']	ARYRCCRSQSRSRYYRQRQRSRRRRRRSCQTRRRAMRCCRPRYRPRCRRH	ARYRccRSQSRSRYYRQRQRSRRRRRRScQTRRRAMRccRPRYRPRcRRH	C5(Carbamidomethyl); C6(Carbamidomethyl); C29(Carbamidomethyl); C38(Carbamidomethyl); C39(Carbamidomethyl); C47(Carbamidomethyl)	2	51	[]	[]	[]	[]	9999	47.61	PS-008	0	P|000	7029.45	-0.142464	P1	P1	Unmod	P1	P|000 → P1
A	R02	A_R02	TP	299	4005000000	31.8992	0.655946	8.957	7029.61	0.011225	0.011225	P04553	P1	['P1']	ARYRCCRSQSRSRYYRQRQRSRRRRRRSCQTRRRAMRCCRPRYRPRCRRH	M.ARYR(C)[Carbamidomethylation](C)[Carbamidomethylation]RSQSRSRYYRQRQRSRRRRRRS(C)[Carbamidomethylation]QTRRRAMR(C)[Carbamidomethylation](C)[Carbamidomethylation]RPRYRPR(C)[Carbamidomethylation]RRH.		2	51	[]	[]	[]	[]		29.3789	TP-071	0	P|000	7029.45	-0.142464	P1	P1	Unmod	P1	P|000 → P1
A	R01	A_R01	PS	380	1.1245e+06	20.1009	1.41496	11.0473	7029.61	0.0113185	0.0113185	Sperm protamine P1	P1	['P1']	ARYRCCRSQSRSRYYRQRQRSRRRRRRSCQTRRRAMRCCRPRYRPRCRRH	ARYRccRSQSRSRYYRQRQRSRRRRRRScQTRRRAMRccRPRYRPRcRRH	C5(Carbamidomethyl); C6(Carbamidomethyl); C29(Carbamidomethyl); C38(Carbamidomethyl); C39(Carbamidomethyl); C47(Carbamidomethyl)	2	51	[]	[]	[]	[]	9999	113.54	PS-008	0	P|000	7029.45	-0.142464	P1	P1	Unmod	P1	P|000 → P1
A	R01	A_R01	TP	870	5938000000	32.4673	0.731954	24.9135	7029.61	0.011375	0.011375	P04553	P1	['P1']	ARYRCCRSQSRSRYYRQRQRSRRRRRRSCQTRRRAMRCCRPRYRPRCRRH	M.ARYR(C)[Carbamidomethylation](C)[Carbamidomethylation]RSQSRSRYYRQRQRSRRRRRRS(C)[Carbamidomethylation]QTRRRAMR(C)[Carbamidomethylation](C)[Carbamidomethylation]RPRYRPR(C)[Carbamidomethylation]RRH.		2	51	[]	[]	[]	[]		25.0941	TP-071	0	P|000	7029.45	-0.142464	P1	P1	Unmod	P1	P|000 → P1
A	R02	A_R02	TP	211	4005000000	31.8992	0.655946	6.34533	7029.61	0.011395	0.011395	P04553	P1	['P1']	ARYRCCRSQSRSRYYRQRQRSRRRRRRSCQTRRRAMRCCRPRYRPRCRRH	M.ARYR(C)[Carbamidomethylation](C)[Carbamidomethylation]RSQSRSRYYRQRQRSRRRRRRS(C)[Carbamidomethylation]QTRRRAMR(C)[Carbamidomethylation](C)[Carbamidomethylation]RPRYRPR(C)[Carbamidomethylation]RRH.		2	51	[]	[]	[]	[]		24.2476	TP-071	0	P|000	7029.45	-0.142464	P1	P1	Unmod	P1	P|000 → P1
A	R02	A_R02	TP	385	4005000000	31.8992	0.655946	11.4107	7029.61	0.011515	0.011515	P04553	P1	['P1']	ARYRCCRSQSRSRYYRQRQRSRRRRRRSCQTRRRAMRCCRPRYRPRCRRH	M.ARYR(C)[Carbamidomethylation](C)[Carbamidomethylation]RSQSRSRYYRQRQRSRRRRRRS(C)[Carbamidomethylation]QTRRRAMR(C)[Carbamidomethylation](C)[Carbamidomethylation]RPRYRPR(C)[Carbamidomethylation]RRH.		2	51	[]	[]	[]	[]		26.9848	TP-071	0	P|000	7029.45	-0.142464	P1	P1	Unmod	P1	P|000 → P1
A	R02	A_R02	TP	134	4005000000	31.8992	0.655946	4.01883	7029.61	0.011725	0.011725	P04553	P1	['P1']	ARYRCCRSQSRSRYYRQRQRSRRRRRRSCQTRRRAMRCCRPRYRPRCRRH	M.ARYR(C)[Carbamidomethylation](C)[Carbamidomethylation]RSQSRSRYYRQRQRSRRRRRRS(C)[Carbamidomethylation]QTRRRAMR(C)[Carbamidomethylation](C)[Carbamidomethylation]RPRYRPR(C)[Carbamidomethylation]RRH.		2	51	[]	[]	[]	[]		21.0555	TP-071	0	P|000	7029.45	-0.142464	P1	P1	Unmod	P1	P|000 → P1
A	R02	A_R02	TP	69	4005000000	31.8992	0.655946	2.05083	7029.61	0.011735	0.011735	P04553	P1	['P1']	ARYRCCRSQSRSRYYRQRQRSRRRRRRSCQTRRRAMRCCRPRYRPRCRRH	M.ARYR(C)[Carbamidomethylation](C)[Carbamidomethylation]RSQSRSRYYRQRQRSRRRRRRS(C)[Carbamidomethylation]QTRRRAMR(C)[Carbamidomethylation](C)[Carbamidomethylation]RPRYRPR(C)[Carbamidomethylation]RRH.		2	51	[]	[]	[]	[]		22.1866	TP-071	0	P|000	7029.45	-0.142464	P1	P1	Unmod	P1	P|000 → P1
A	R02	A_R02	TP	445	4005000000	31.8992	0.655946	13.1632	7029.61	0.011755	0.011755	P04553	P1	['P1']	ARYRCCRSQSRSRYYRQRQRSRRRRRRSCQTRRRAMRCCRPRYRPRCRRH	M.ARYR(C)[Carbamidomethylation](C)[Carbamidomethylation]RSQSRSRYYRQRQRSRRRRRRS(C)[Carbamidomethylation]QTRRRAMR(C)[Carbamidomethylation](C)[Carbamidomethylation]RPRYRPR(C)[Carbamidomethylation]RRH.		2	51	[]	[]	[]	[]		25.5598	TP-071	0	P|000	7029.45	-0.142464	P1	P1	Unmod	P1	P|000 → P1
A	R02	A_R02	TP	241	4005000000	31.8992	0.655946	7.25483	7029.61	0.011815	0.011815	P04553	P1	['P1']	ARYRCCRSQSRSRYYRQRQRSRRRRRRSCQTRRRAMRCCRPRYRPRCRRH	M.ARYR(C)[Carbamidomethylation](C)[Carbamidomethylation]RSQSRSRYYRQRQRSRRRRRRS(C)[Carbamidomethylation]QTRRRAMR(C)[Carbamidomethylation](C)[Carbamidomethylation]RPRYRPR(C)[Carbamidomethylation]RRH.		2	51	[]	[]	[]	[]		22.2676	TP-071	0	P|000	7029.45	-0.142464	P1	P1	Unmod	P1	P|000 → P1
B	R03	B_R03	PS	1229	46866.3	15.5163	-0.301437	35.5535	7029.61	0.0120185	0.0120185	Sperm protamine P1	P1	['P1']	ARYRCCRSQSRSRYYRQRQRSRRRRRRSCQTRRRAMRCCRPRYRPRCRRH	ARYRccRSQSRSRYYRQRQRSRRRRRRScQTRRRAMRccRPRYRPRcRRH	C5(Carbamidomethyl); C6(Carbamidomethyl); C29(Carbamidomethyl); C38(Carbamidomethyl); C39(Carbamidomethyl); C47(Carbamidomethyl)	2	51	[]	[]	[]	[]	9999	110.98	PS-008	0	P|000	7029.45	-0.142464	P1	P1	Unmod	P1	P|000 → P1
B	R03	B_R03	PS	469	454820	18.7949	0.96981	13.7505	7029.61	0.0122185	0.0122185	Sperm protamine P1	P1	['P1']	ARYRCCRSQSRSRYYRQRQRSRRRRRRSCQTRRRAMRCCRPRYRPRCRRH	ARYRccRSQSRSRYYRQRQRSRRRRRRScQTRRRAMRccRPRYRPRcRRH	C5(Carbamidomethyl); C6(Carbamidomethyl); C29(Carbamidomethyl); C38(Carbamidomethyl); C39(Carbamidomethyl); C47(Carbamidomethyl)	2	51	[]	[]	[]	[]	9999	117.33	PS-008	0	P|000	7029.45	-0.142464	P1	P1	Unmod	P1	P|000 → P1
A	R02	A_R02	TP	171	4005000000	31.8992	0.655946	5.13717	7029.61	0.012275	0.012275	P04553	P1	['P1']	ARYRCCRSQSRSRYYRQRQRSRRRRRRSCQTRRRAMRCCRPRYRPRCRRH	M.ARYR(C)[Carbamidomethylation](C)[Carbamidomethylation]RSQSRSRYYRQRQRSRRRRRRS(C)[Carbamidomethylation]QTRRRAMR(C)[Carbamidomethylation](C)[Carbamidomethylation]RPRYRPR(C)[Carbamidomethylation]RRH.		2	51	[]	[]	[]	[]		20.9083	TP-071	0	P|000	7029.45	-0.142464	P1	P1	Unmod	P1	P|000 → P1
A	R02	A_R02	TP	425	4005000000	31.8992	0.655946	12.5805	7029.61	0.012335	0.012335	P04553	P1	['P1']	ARYRCCRSQSRSRYYRQRQRSRRRRRRSCQTRRRAMRCCRPRYRPRCRRH	M.ARYR(C)[Carbamidomethylation](C)[Carbamidomethylation]RSQSRSRYYRQRQRSRRRRRRS(C)[Carbamidomethylation]QTRRRAMR(C)[Carbamidomethylation](C)[Carbamidomethylation]RPRYRPR(C)[Carbamidomethylation]RRH.		2	51	[]	[]	[]	[]		28.1375	TP-071	0	P|000	7029.45	-0.142464	P1	P1	Unmod	P1	P|000 → P1
A	R02	A_R02	TP	319	4005000000	31.8992	0.655946	9.5305	7029.61	0.012435	0.012435	P04553	P1	['P1']	ARYRCCRSQSRSRYYRQRQRSRRRRRRSCQTRRRAMRCCRPRYRPRCRRH	M.ARYR(C)[Carbamidomethylation](C)[Carbamidomethylation]RSQSRSRYYRQRQRSRRRRRRS(C)[Carbamidomethylation]QTRRRAMR(C)[Carbamidomethylation](C)[Carbamidomethylation]RPRYRPR(C)[Carbamidomethylation]RRH.		2	51	[]	[]	[]	[]		27.9353	TP-071	0	P|000	7029.45	-0.142464	P1	P1	Unmod	P1	P|000 → P1
B	R03	B_R03	PS	227	16379.6	13.9996	-0.88949	6.8004	7029.61	0.0125185	0.0125185	Sperm protamine P1	P1	['P1']	ARYRCCRSQSRSRYYRQRQRSRRRRRRSCQTRRRAMRCCRPRYRPRCRRH	ARYRccRSQSRSRYYRQRQRSRRRRRRScQTRRRAMRccRPRYRPRcRRH	C5(Carbamidomethyl); C6(Carbamidomethyl); C29(Carbamidomethyl); C38(Carbamidomethyl); C39(Carbamidomethyl); C47(Carbamidomethyl)	2	51	[]	[]	[]	[]	9999	55.28	PS-008	0	P|000	7029.45	-0.142464	P1	P1	Unmod	P1	P|000 → P1
A	R02	A_R02	TP	341	4005000000	31.8992	0.655946	10.1603	7029.61	0.012715	0.012715	P04553	P1	['P1']	ARYRCCRSQSRSRYYRQRQRSRRRRRRSCQTRRRAMRCCRPRYRPRCRRH	M.ARYR(C)[Carbamidomethylation](C)[Carbamidomethylation]RSQSRSRYYRQRQRSRRRRRRS(C)[Carbamidomethylation]QTRRRAMR(C)[Carbamidomethylation](C)[Carbamidomethylation]RPRYRPR(C)[Carbamidomethylation]RRH.		2	51	[]	[]	[]	[]		28.2901	TP-071	0	P|000	7029.45	-0.142464	P1	P1	Unmod	P1	P|000 → P1
B	R03	B_R03	TP	99	5713000000	32.4116	0.938315	2.93933	7029.61	0.012925	0.012925	P04553	P1	['P1']	ARYRCCRSQSRSRYYRQRQRSRRRRRRSCQTRRRAMRCCRPRYRPRCRRH	M.ARYR(C)[Carbamidomethylation](C)[Carbamidomethylation]RSQSRSRYYRQRQRSRRRRRRS(C)[Carbamidomethylation]QTRRRAMR(C)[Carbamidomethylation](C)[Carbamidomethylation]RPRYRPR(C)[Carbamidomethylation]RRH.		2	51	[]	[]	[]	[]		6.5171	TP-071	0	P|000	7029.45	-0.142464	P1	P1	Unmod	P1	P|000 → P1
B	R03	B_R03	TP	119	5713000000	32.4116	0.938315	3.54283	7029.61	0.013145	0.013145	P04553	P1	['P1']	ARYRCCRSQSRSRYYRQRQRSRRRRRRSCQTRRRAMRCCRPRYRPRCRRH	M.ARYR(C)[Carbamidomethylation](C)[Carbamidomethylation]RSQSRSRYYRQRQRSRRRRRRS(C)[Carbamidomethylation]QTRRRAMR(C)[Carbamidomethylation](C)[Carbamidomethylation]RPRYRPR(C)[Carbamidomethylation]RRH.		2	51	[]	[]	[]	[]		15.949	TP-071	0	P|000	7029.45	-0.142464	P1	P1	Unmod	P1	P|000 → P1
B	R04	B_R04	TP	1163	709800000	29.4028	-0.571492	32.8823	7029.61	0.013185	0.013185	P04553	P1	['P1']	ARYRCCRSQSRSRYYRQRQRSRRRRRRSCQTRRRAMRCCRPRYRPRCRRH	M.ARYR(C)[Carbamidomethylation](C)[Carbamidomethylation]RSQSRSRYYRQRQRSRRRRRRS(C)[Carbamidomethylation]QTRRRAMR(C)[Carbamidomethylation](C)[Carbamidomethylation]RPRYRPR(C)[Carbamidomethylation]RRH.		2	51	[]	[]	[]	[]		25.63	TP-071	0	P|000	7029.45	-0.142464	P1	P1	Unmod	P1	P|000 → P1
B	R03	B_R03	TP	115	5713000000	32.4116	0.938315	3.42217	7029.61	0.013865	0.013865	P04553	P1	['P1']	ARYRCCRSQSRSRYYRQRQRSRRRRRRSCQTRRRAMRCCRPRYRPRCRRH	M.ARYR(C)[Carbamidomethylation](C)[Carbamidomethylation]RSQSRSRYYRQRQRSRRRRRRS(C)[Carbamidomethylation]QTRRRAMR(C)[Carbamidomethylation](C)[Carbamidomethylation]RPRYRPR(C)[Carbamidomethylation]RRH.		2	51	[]	[]	[]	[]		21.8161	TP-071	0	P|000	7029.45	-0.142464	P1	P1	Unmod	P1	P|000 → P1
B	R03	B_R03	PS	793	82730.5	16.3361	0.0164524	22.8462	7029.61	0.0140185	0.0140185	Sperm protamine P1	P1	['P1']	ARYRCCRSQSRSRYYRQRQRSRRRRRRSCQTRRRAMRCCRPRYRPRCRRH	ARYRccRSQSRSRYYRQRQRSRRRRRRScQTRRRAMRccRPRYRPRcRRH	C5(Carbamidomethyl); C6(Carbamidomethyl); C29(Carbamidomethyl); C38(Carbamidomethyl); C39(Carbamidomethyl); C47(Carbamidomethyl)	2	51	[]	[]	[]	[]	9999	108.53	PS-008	0	P|000	7029.45	-0.142464	P1	P1	Unmod	P1	P|000 → P1
A	R01	A_R01	TP	1214	5938000000	32.4673	0.731954	34.92	7029.61	0.014375	0.014375	P04553	P1	['P1']	ARYRCCRSQSRSRYYRQRQRSRRRRRRSCQTRRRAMRCCRPRYRPRCRRH	M.ARYR(C)[Carbamidomethylation](C)[Carbamidomethylation]RSQSRSRYYRQRQRSRRRRRRS(C)[Carbamidomethylation]QTRRRAMR(C)[Carbamidomethylation](C)[Carbamidomethylation]RPRYRPR(C)[Carbamidomethylation]RRH.		2	51	[]	[]	[]	[]		20.4359	TP-071	0	P|000	7029.45	-0.142464	P1	P1	Unmod	P1	P|000 → P1
A	R02	A_R02	PS	1195	34895.3	15.0907	-0.566008	34.5737	7029.61	0.0146185	0.0146185	Sperm protamine P1	P1	['P1']	ARYRCCRSQSRSRYYRQRQRSRRRRRRSCQTRRRAMRCCRPRYRPRCRRH	ARYRccRSQSRSRYYRQRQRSRRRRRRScQTRRRAMRccRPRYRPRcRRH	C5(Carbamidomethyl); C6(Carbamidomethyl); C29(Carbamidomethyl); C38(Carbamidomethyl); C39(Carbamidomethyl); C47(Carbamidomethyl)	2	51	[]	[]	[]	[]	9999	83.89	PS-008	0	P|000	7029.45	-0.142464	P1	P1	Unmod	P1	P|000 → P1
B	R03	B_R03	TP	247	5713000000	32.4116	0.938315	7.40217	7029.61	0.014745	0.014745	P04553	P1	['P1']	ARYRCCRSQSRSRYYRQRQRSRRRRRRSCQTRRRAMRCCRPRYRPRCRRH	M.ARYR(C)[Carbamidomethylation](C)[Carbamidomethylation]RSQSRSRYYRQRQRSRRRRRRS(C)[Carbamidomethylation]QTRRRAMR(C)[Carbamidomethylation](C)[Carbamidomethylation]RPRYRPR(C)[Carbamidomethylation]RRH.		2	51	[]	[]	[]	[]		20.9162	TP-071	0	P|000	7029.45	-0.142464	P1	P1	Unmod	P1	P|000 → P1
B	R03	B_R03	TP	66	5713000000	32.4116	0.938315	1.945	7029.61	0.014825	0.014825	P04553	P1	['P1']	ARYRCCRSQSRSRYYRQRQRSRRRRRRSCQTRRRAMRCCRPRYRPRCRRH	M.ARYR(C)[Carbamidomethylation](C)[Carbamidomethylation]RSQSRSRYYRQRQRSRRRRRRS(C)[Carbamidomethylation]QTRRRAMR(C)[Carbamidomethylation](C)[Carbamidomethylation]RPRYRPR(C)[Carbamidomethylation]RRH.		2	51	[]	[]	[]	[]		22.7038	TP-071	0	P|000	7029.45	-0.142464	P1	P1	Unmod	P1	P|000 → P1
A	R02	A_R02	TP	1129	4005000000	31.8992	0.655946	32.6573	7029.61	0.015575	0.015575	P04553	P1	['P1']	ARYRCCRSQSRSRYYRQRQRSRRRRRRSCQTRRRAMRCCRPRYRPRCRRH	M.ARYR(C)[Carbamidomethylation](C)[Carbamidomethylation]RSQSRSRYYRQRQRSRRRRRRS(C)[Carbamidomethylation]QTRRRAMR(C)[Carbamidomethylation](C)[Carbamidomethylation]RPRYRPR(C)[Carbamidomethylation]RRH.		2	51	[]	[]	[]	[]		22.9012	TP-071	0	P|000	7029.45	-0.142464	P1	P1	Unmod	P1	P|000 → P1
B	R03	B_R03	TP	45	5713000000	32.4116	0.938315	1.31417	7029.61	0.015815	0.015815	P04553	P1	['P1']	ARYRCCRSQSRSRYYRQRQRSRRRRRRSCQTRRRAMRCCRPRYRPRCRRH	M.ARYR(C)[Carbamidomethylation](C)[Carbamidomethylation]RSQSRSRYYRQRQRSRRRRRRS(C)[Carbamidomethylation]QTRRRAMR(C)[Carbamidomethylation](C)[Carbamidomethylation]RPRYRPR(C)[Carbamidomethylation]RRH.		2	51	[]	[]	[]	[]		22.952	TP-071	0	P|000	7029.45	-0.142464	P1	P1	Unmod	P1	P|000 → P1
A	R02	A_R02	TP	63	4005000000	31.8992	0.655946	1.86883	7029.61	0.015875	0.015875	P04553	P1	['P1']	ARYRCCRSQSRSRYYRQRQRSRRRRRRSCQTRRRAMRCCRPRYRPRCRRH	M.ARYR(C)[Carbamidomethylation](C)[Carbamidomethylation]RSQSRSRYYRQRQRSRRRRRRS(C)[Carbamidomethylation]QTRRRAMR(C)[Carbamidomethylation](C)[Carbamidomethylation]RPRYRPR(C)[Carbamidomethylation]RRH.		2	51	[]	[]	[]	[]		22.8566	TP-071	0	P|000	7029.45	-0.142464	P1	P1	Unmod	P1	P|000 → P1
A	R01	A_R01	PS	1090	57111.1	15.8015	-0.601084	31.3228	7029.61	0.0159185	0.0159185	Sperm protamine P1	P1	['P1']	ARYRCCRSQSRSRYYRQRQRSRRRRRRSCQTRRRAMRCCRPRYRPRCRRH	ARYRccRSQSRSRYYRQRQRSRRRRRRScQTRRRAMRccRPRYRPRcRRH	C5(Carbamidomethyl); C6(Carbamidomethyl); C29(Carbamidomethyl); C38(Carbamidomethyl); C39(Carbamidomethyl); C47(Carbamidomethyl)	2	51	[]	[]	[]	[]	9999	90.59	PS-008	0	P|000	7029.45	-0.142464	P1	P1	Unmod	P1	P|000 → P1
A	R02	A_R02	TP	219	4005000000	31.8992	0.655946	6.588	7029.61	0.016145	0.016145	P04553	P1	['P1']	ARYRCCRSQSRSRYYRQRQRSRRRRRRSCQTRRRAMRCCRPRYRPRCRRH	M.ARYR(C)[Carbamidomethylation](C)[Carbamidomethylation]RSQSRSRYYRQRQRSRRRRRRS(C)[Carbamidomethylation]QTRRRAMR(C)[Carbamidomethylation](C)[Carbamidomethylation]RPRYRPR(C)[Carbamidomethylation]RRH.		2	51	[]	[]	[]	[]		15.0174	TP-071	0	P|000	7029.45	-0.142464	P1	P1	Unmod	P1	P|000 → P1
A	R02	A_R02	TP	193	4005000000	31.8992	0.655946	5.80033	7029.61	0.016395	0.016395	P04553	P1	['P1']	ARYRCCRSQSRSRYYRQRQRSRRRRRRSCQTRRRAMRCCRPRYRPRCRRH	M.ARYR(C)[Carbamidomethylation](C)[Carbamidomethylation]RSQSRSRYYRQRQRSRRRRRRS(C)[Carbamidomethylation]QTRRRAMR(C)[Carbamidomethylation](C)[Carbamidomethylation]RPRYRPR(C)[Carbamidomethylation]RRH.		2	51	[]	[]	[]	[]		22.3958	TP-071	0	P|000	7029.45	-0.142464	P1	P1	Unmod	P1	P|000 → P1
A	R02	A_R02	TP	995	4005000000	31.8992	0.655946	28.769	7029.61	0.016395	0.016395	P04553	P1	['P1']	ARYRCCRSQSRSRYYRQRQRSRRRRRRSCQTRRRAMRCCRPRYRPRCRRH	M.ARYR(C)[Carbamidomethylation](C)[Carbamidomethylation]RSQSRSRYYRQRQRSRRRRRRS(C)[Carbamidomethylation]QTRRRAMR(C)[Carbamidomethylation](C)[Carbamidomethylation]RPRYRPR(C)[Carbamidomethylation]RRH.		2	51	[]	[]	[]	[]		24.3188	TP-071	0	P|000	7029.45	-0.142464	P1	P1	Unmod	P1	P|000 → P1
B	R03	B_R03	PS	218	24241.9	14.5652	-0.670188	6.5298	7029.61	0.0164185	0.0164185	Sperm protamine P1	P1	['P1']	ARYRCCRSQSRSRYYRQRQRSRRRRRRSCQTRRRAMRCCRPRYRPRCRRH	ARYRccRSQSRSRYYRQRQRSRRRRRRScQTRRRAMRccRPRYRPRcRRH	C5(Carbamidomethyl); C6(Carbamidomethyl); C29(Carbamidomethyl); C38(Carbamidomethyl); C39(Carbamidomethyl); C47(Carbamidomethyl)	2	51	[]	[]	[]	[]	9999	32.56	PS-008	0	P|000	7029.45	-0.142464	P1	P1	Unmod	P1	P|000 → P1
A	R02	A_R02	PS	853	34392.5	15.0698	-0.57467	24.6303	7029.61	0.0164185	0.0164185	Sperm protamine P1	P1	['P1']	ARYRCCRSQSRSRYYRQRQRSRRRRRRSCQTRRRAMRCCRPRYRPRCRRH	ARYRccRSQSRSRYYRQRQRSRRRRRRScQTRRRAMRccRPRYRPRcRRH	C5(Carbamidomethyl); C6(Carbamidomethyl); C29(Carbamidomethyl); C38(Carbamidomethyl); C39(Carbamidomethyl); C47(Carbamidomethyl)	2	51	[]	[]	[]	[]	9999	67.63	PS-008	0	P|000	7029.45	-0.142464	P1	P1	Unmod	P1	P|000 → P1
A	R02	A_R02	TP	110	4005000000	31.8992	0.655946	3.29233	7029.61	0.016525	0.016525	P04553	P1	['P1']	ARYRCCRSQSRSRYYRQRQRSRRRRRRSCQTRRRAMRCCRPRYRPRCRRH	M.ARYR(C)[Carbamidomethylation](C)[Carbamidomethylation]RSQSRSRYYRQRQRSRRRRRRS(C)[Carbamidomethylation]QTRRRAMR(C)[Carbamidomethylation](C)[Carbamidomethylation]RPRYRPR(C)[Carbamidomethylation]RRH.		2	51	[]	[]	[]	[]		22.8319	TP-071	0	P|000	7029.45	-0.142464	P1	P1	Unmod	P1	P|000 → P1
A	R02	A_R02	TP	138	4005000000	31.8992	0.655946	4.14	7029.61	0.016635	0.016635	P04553	P1	['P1']	ARYRCCRSQSRSRYYRQRQRSRRRRRRSCQTRRRAMRCCRPRYRPRCRRH	M.ARYR(C)[Carbamidomethylation](C)[Carbamidomethylation]RSQSRSRYYRQRQRSRRRRRRS(C)[Carbamidomethylation]QTRRRAMR(C)[Carbamidomethylation](C)[Carbamidomethylation]RPRYRPR(C)[Carbamidomethylation]RRH.		2	51	[]	[]	[]	[]		13.8704	TP-071	0	P|000	7029.45	-0.142464	P1	P1	Unmod	P1	P|000 → P1
B	R03	B_R03	TP	95	5713000000	32.4116	0.938315	2.8185	7029.61	0.016715	0.016715	P04553	P1	['P1']	ARYRCCRSQSRSRYYRQRQRSRRRRRRSCQTRRRAMRCCRPRYRPRCRRH	M.ARYR(C)[Carbamidomethylation](C)[Carbamidomethylation]RSQSRSRYYRQRQRSRRRRRRS(C)[Carbamidomethylation]QTRRRAMR(C)[Carbamidomethylation](C)[Carbamidomethylation]RPRYRPR(C)[Carbamidomethylation]RRH.		2	51	[]	[]	[]	[]		21.6584	TP-071	0	P|000	7029.45	-0.142464	P1	P1	Unmod	P1	P|000 → P1
A	R02	A_R02	TP	1325	4005000000	31.8992	0.655946	38.3585	7029.61	0.016775	0.016775	P04553	P1	['P1']	ARYRCCRSQSRSRYYRQRQRSRRRRRRSCQTRRRAMRCCRPRYRPRCRRH	M.ARYR(C)[Carbamidomethylation](C)[Carbamidomethylation]RSQSRSRYYRQRQRSRRRRRRS(C)[Carbamidomethylation]QTRRRAMR(C)[Carbamidomethylation](C)[Carbamidomethylation]RPRYRPR(C)[Carbamidomethylation]RRH.		2	51	[]	[]	[]	[]		24.146	TP-071	0	P|000	7029.45	-0.142464	P1	P1	Unmod	P1	P|000 → P1
B	R04	B_R04	PS	757	189133	17.529	-0.195569	21.0295	7029.61	0.0168185	0.0168185	Sperm protamine P1	P1	['P1']	ARYRCCRSQSRSRYYRQRQRSRRRRRRSCQTRRRAMRCCRPRYRPRCRRH	ARYRccRSQSRSRYYRQRQRSRRRRRRScQTRRRAMRccRPRYRPRcRRH	C5(Carbamidomethyl); C6(Carbamidomethyl); C29(Carbamidomethyl); C38(Carbamidomethyl); C39(Carbamidomethyl); C47(Carbamidomethyl)	2	51	[]	[]	[]	[]	9999	67.04	PS-008	0	P|000	7029.45	-0.142464	P1	P1	Unmod	P1	P|000 → P1
A	R02	A_R02	TP	153	4005000000	31.8992	0.655946	4.59083	7029.61	0.016895	0.016895	P04553	P1	['P1']	ARYRCCRSQSRSRYYRQRQRSRRRRRRSCQTRRRAMRCCRPRYRPRCRRH	M.ARYR(C)[Carbamidomethylation](C)[Carbamidomethylation]RSQSRSRYYRQRQRSRRRRRRS(C)[Carbamidomethylation]QTRRRAMR(C)[Carbamidomethylation](C)[Carbamidomethylation]RPRYRPR(C)[Carbamidomethylation]RRH.		2	51	[]	[]	[]	[]		22.025	TP-071	0	P|000	7029.45	-0.142464	P1	P1	Unmod	P1	P|000 → P1
A	R02	A_R02	TP	233	4005000000	31.8992	0.655946	7.01133	7029.61	0.017235	0.017235	P04553	P1	['P1']	ARYRCCRSQSRSRYYRQRQRSRRRRRRSCQTRRRAMRCCRPRYRPRCRRH	M.ARYR(C)[Carbamidomethylation](C)[Carbamidomethylation]RSQSRSRYYRQRQRSRRRRRRS(C)[Carbamidomethylation]QTRRRAMR(C)[Carbamidomethylation](C)[Carbamidomethylation]RPRYRPR(C)[Carbamidomethylation]RRH.		2	51	[]	[]	[]	[]		22.3483	TP-071	0	P|000	7029.45	-0.142464	P1	P1	Unmod	P1	P|000 → P1
A	R02	A_R02	TP	213	4005000000	31.8992	0.655946	6.406	7029.61	0.017325	0.017325	P04553	P1	['P1']	ARYRCCRSQSRSRYYRQRQRSRRRRRRSCQTRRRAMRCCRPRYRPRCRRH	M.ARYR(C)[Carbamidomethylation](C)[Carbamidomethylation]RSQSRSRYYRQRQRSRRRRRRS(C)[Carbamidomethylation]QTRRRAMR(C)[Carbamidomethylation](C)[Carbamidomethylation]RPRYRPR(C)[Carbamidomethylation]RRH.		2	51	[]	[]	[]	[]		23.7101	TP-071	0	P|000	7029.45	-0.142464	P1	P1	Unmod	P1	P|000 → P1
A	R02	A_R02	TP	130	4005000000	31.8992	0.655946	3.89767	7029.61	0.017465	0.017465	P04553	P1	['P1']	ARYRCCRSQSRSRYYRQRQRSRRRRRRSCQTRRRAMRCCRPRYRPRCRRH	M.ARYR(C)[Carbamidomethylation](C)[Carbamidomethylation]RSQSRSRYYRQRQRSRRRRRRS(C)[Carbamidomethylation]QTRRRAMR(C)[Carbamidomethylation](C)[Carbamidomethylation]RPRYRPR(C)[Carbamidomethylation]RRH.		2	51	[]	[]	[]	[]		21.8082	TP-071	0	P|000	7029.45	-0.142464	P1	P1	Unmod	P1	P|000 → P1
A	R02	A_R02	TP	173	4005000000	31.8992	0.655946	5.19767	7029.61	0.017975	0.017975	P04553	P1	['P1']	ARYRCCRSQSRSRYYRQRQRSRRRRRRSCQTRRRAMRCCRPRYRPRCRRH	M.ARYR(C)[Carbamidomethylation](C)[Carbamidomethylation]RSQSRSRYYRQRQRSRRRRRRS(C)[Carbamidomethylation]QTRRRAMR(C)[Carbamidomethylation](C)[Carbamidomethylation]RPRYRP(R(C)[Carbamidomethylation])[0.0030]RRH.		2	51	[]	[]	[]	[]		20.863	TP-071	0	P|000	7029.45	-0.142464	P1	P1	Unmod	P1	P|000 → P1
B	R03	B_R03	PS	427	796837	19.6039	1.28348	12.5486	7029.61	0.0181185	0.0181185	Sperm protamine P1	P1	['P1']	ARYRCCRSQSRSRYYRQRQRSRRRRRRSCQTRRRAMRCCRPRYRPRCRRH	ARYRccRSQSRSRYYRQRQRSRRRRRRScQTRRRAMRccRPRYRPRcRRH	C5(Carbamidomethyl); C6(Carbamidomethyl); C29(Carbamidomethyl); C38(Carbamidomethyl); C39(Carbamidomethyl); C47(Carbamidomethyl)	2	51	[]	[]	[]	[]	9999	87.59	PS-008	0	P|000	7029.45	-0.142464	P1	P1	Unmod	P1	P|000 → P1
A	R02	A_R02	TP	31	4005000000	31.8992	0.655946	0.9015	7029.61	0.018525	0.018525	P04553	P1	['P1']	ARYRCCRSQSRSRYYRQRQRSRRRRRRSCQTRRRAMRCCRPRYRPRCRRH	M.ARYR(C)[Carbamidomethylation](C)[Carbamidomethylation]RSQSRSRYYRQRQRSRRRRRRS(C)[Carbamidomethylation]QTRRRAMR(C)[Carbamidomethylation](C)[Carbamidomethylation]RPRYRPR(C)[Carbamidomethylation]RRH.		2	51	[]	[]	[]	[]		21.3817	TP-071	0	P|000	7029.45	-0.142464	P1	P1	Unmod	P1	P|000 → P1
B	R04	B_R04	PS	1163	94661.5	16.5305	-0.588711	32.8823	7029.61	0.0188185	0.0188185	Sperm protamine P1	P1	['P1']	ARYRCCRSQSRSRYYRQRQRSRRRRRRSCQTRRRAMRCCRPRYRPRCRRH	ARYRccRSQSRSRYYRQRQRSRRRRRRScQTRRRAMRccRPRYRPRcRRH	C5(Carbamidomethyl); C6(Carbamidomethyl); C29(Carbamidomethyl); C38(Carbamidomethyl); C39(Carbamidomethyl); C47(Carbamidomethyl)	2	51	[]	[]	[]	[]	9999	104.19	PS-008	0	P|000	7029.45	-0.142464	P1	P1	Unmod	P1	P|000 → P1
B	R03	B_R03	PS	407	1.01678e+06	19.9556	1.41983	11.9619	7029.61	0.0190185	0.0190185	Sperm protamine P1	P1	['P1']	ARYRCCRSQSRSRYYRQRQRSRRRRRRSCQTRRRAMRCCRPRYRPRCRRH	ARYRccRSQSRSRYYRQRQRSRRRRRRScQTRRRAMRccRPRYRPRcRRH	C5(Carbamidomethyl); C6(Carbamidomethyl); C29(Carbamidomethyl); C38(Carbamidomethyl); C39(Carbamidomethyl); C47(Carbamidomethyl)	2	51	[]	[]	[]	[]	9999	113.72	PS-008	0	P|000	7029.45	-0.142464	P1	P1	Unmod	P1	P|000 → P1
A	R02	A_R02	PS	1337	25786.5	14.6543	-0.746538	38.709	7029.61	0.0190185	0.0190185	Sperm protamine P1	P1	['P1']	ARYRCCRSQSRSRYYRQRQRSRRRRRRSCQTRRRAMRCCRPRYRPRCRRH	ARYRccRSQSRSRYYRQRQRSRRRRRRScQTRRRAMRccRPRYRPRcRRH	C5(Carbamidomethyl); C6(Carbamidomethyl); C29(Carbamidomethyl); C38(Carbamidomethyl); C39(Carbamidomethyl); C47(Carbamidomethyl)	2	51	[]	[]	[]	[]	9999	80.07	PS-008	0	P|000	7029.45	-0.142464	P1	P1	Unmod	P1	P|000 → P1
A	R02	A_R02	TP	179	4005000000	31.8992	0.655946	5.37783	7029.62	0.019475	0.019475	P04553	P1	['P1']	ARYRCCRSQSRSRYYRQRQRSRRRRRRSCQTRRRAMRCCRPRYRPRCRRH	M.ARYR(C)[Carbamidomethylation](C)[Carbamidomethylation]RSQSRSRYYRQRQRSRRRRRRS(C)[Carbamidomethylation]QTRRRAMR(C)[Carbamidomethylation](C)[Carbamidomethylation]RPRYRPR(C)[Carbamidomethylation]RRH.		2	51	[]	[]	[]	[]		10.694	TP-071	0	P|000	7029.45	-0.142464	P1	P1	Unmod	P1	P|000 → P1
B	R03	B_R03	TP	445	5713000000	32.4116	0.938315	13.0727	7029.62	0.021915	0.021915	P04553	P1	['P1']	ARYRCCRSQSRSRYYRQRQRSRRRRRRSCQTRRRAMRCCRPRYRPRCRRH	M.ARYR(C)[Carbamidomethylation](C)[Carbamidomethylation]RSQSRSRYYRQRQRSRRRRRRS(C)[Carbamidomethylation]QTRRRAMR(C)[Carbamidomethylation](C)[Carbamidomethylation]RPRYRPR(C)[Carbamidomethylation]RRH.		2	51	[]	[]	[]	[]		28.4661	TP-071	0	P|000	7029.45	-0.142464	P1	P1	Unmod	P1	P|000 → P1
B	R03	B_R03	PS	575	144548	17.1412	0.328601	16.5665	7029.62	0.0219185	0.0219185	Sperm protamine P1	P1	['P1']	ARYRCCRSQSRSRYYRQRQRSRRRRRRSCQTRRRAMRCCRPRYRPRCRRH	ARYRccRSQSRSRYYRQRQRSRRRRRRScQTRRRAMRccRPRYRPRcRRH	C5(Carbamidomethyl); C6(Carbamidomethyl); C29(Carbamidomethyl); C38(Carbamidomethyl); C39(Carbamidomethyl); C47(Carbamidomethyl)	2	51	[]	[]	[]	[]	9999	116.61	PS-008	0	P|000	7029.45	-0.142464	P1	P1	Unmod	P1	P|000 → P1
B	R03	B_R03	PS	125	12403.6	13.5985	-1.04503	3.7239	7029.62	0.0224185	0.0224185	Sperm protamine P1	P1	['P1']	ARYRCCRSQSRSRYYRQRQRSRRRRRRSCQTRRRAMRCCRPRYRPRCRRH	ARYRccRSQSRSRYYRQRQRSRRRRRRScQTRRRAMRccRPRYRPRcRRH	C5(Carbamidomethyl); C6(Carbamidomethyl); C29(Carbamidomethyl); C38(Carbamidomethyl); C39(Carbamidomethyl); C47(Carbamidomethyl)	2	51	[]	[]	[]	[]	9999	61.59	PS-008	0	P|000	7029.45	-0.142464	P1	P1	Unmod	P1	P|000 → P1
B	R03	B_R03	PS	64	34007.3	15.0536	-0.480844	1.8848	7029.62	0.0226185	0.0226185	Sperm protamine P1	P1	['P1']	ARYRCCRSQSRSRYYRQRQRSRRRRRRSCQTRRRAMRCCRPRYRPRCRRH	ARYRccRSQSRSRYYRQRQRSRRRRRRScQTRRRAMRccRPRYRPRcRRH	C5(Carbamidomethyl); C6(Carbamidomethyl); C29(Carbamidomethyl); C38(Carbamidomethyl); C39(Carbamidomethyl); C47(Carbamidomethyl)	2	51	[]	[]	[]	[]	9999	67.09	PS-008	0	P|000	7029.45	-0.142464	P1	P1	Unmod	P1	P|000 → P1
B	R04	B_R04	PS	733	259036	17.9828	-0.0169227	20.3188	7029.62	0.0228185	0.0228185	Sperm protamine P1	P1	['P1']	ARYRCCRSQSRSRYYRQRQRSRRRRRRSCQTRRRAMRCCRPRYRPRCRRH	ARYRccRSQSRSRYYRQRQRSRRRRRRScQTRRRAMRccRPRYRPRcRRH	C5(Carbamidomethyl); C6(Carbamidomethyl); C29(Carbamidomethyl); C38(Carbamidomethyl); C39(Carbamidomethyl); C47(Carbamidomethyl)	2	51	[]	[]	[]	[]	9999	118.29	PS-008	0	P|000	7029.45	-0.142464	P1	P1	Unmod	P1	P|000 → P1
B	R03	B_R03	PS	377	863961	19.7206	1.32872	11.0867	7029.62	0.0228185	0.0228185	Sperm protamine P1	P1	['P1']	ARYRCCRSQSRSRYYRQRQRSRRRRRRSCQTRRRAMRCCRPRYRPRCRRH	ARYRccRSQSRSRYYRQRQRSRRRRRRScQTRRRAMRccRPRYRPRcRRH	C5(Carbamidomethyl); C6(Carbamidomethyl); C29(Carbamidomethyl); C38(Carbamidomethyl); C39(Carbamidomethyl); C47(Carbamidomethyl)	2	51	[]	[]	[]	[]	9999	133.77	PS-008	0	P|000	7029.45	-0.142464	P1	P1	Unmod	P1	P|000 → P1
B	R03	B_R03	PS	425	407045	18.6348	0.907731	12.49	7029.62	0.0235185	0.0235185	Sperm protamine P1	P1	['P1']	ARYRCCRSQSRSRYYRQRQRSRRRRRRSCQTRRRAMRCCRPRYRPRCRRH	ARYRccRSQSRSRYYRQRQRSRRRRRRScQTRRRAMRccRPRYRPRcRRH	C5(Carbamidomethyl); C6(Carbamidomethyl); C29(Carbamidomethyl); C38(Carbamidomethyl); C39(Carbamidomethyl); C47(Carbamidomethyl)	2	51	[]	[]	[]	[]	9999	116.74	PS-008	0	P|000	7029.45	-0.142464	P1	P1	Unmod	P1	P|000 → P1
B	R03	B_R03	TP	401	5713000000	32.4116	0.938315	11.7865	7029.62	0.024125	0.024125	P04553	P1	['P1']	ARYRCCRSQSRSRYYRQRQRSRRRRRRSCQTRRRAMRCCRPRYRPRCRRH	M.ARYR(C)[Carbamidomethylation](C)[Carbamidomethylation]RSQSRSRYYRQRQRSRRRRRRS(C)[Carbamidomethylation]QTRRRAMR(C)[Carbamidomethylation](C)[Carbamidomethylation]RPRYRPR(C)[Carbamidomethylation]RRH.		2	51	[]	[]	[]	[]		29.5174	TP-071	0	P|000	7029.45	-0.142464	P1	P1	Unmod	P1	P|000 → P1
B	R03	B_R03	TP	313	5713000000	32.4116	0.938315	9.30117	7029.62	0.024465	0.024465	P04553	P1	['P1']	ARYRCCRSQSRSRYYRQRQRSRRRRRRSCQTRRRAMRCCRPRYRPRCRRH	M.ARYR(C)[Carbamidomethylation](C)[Carbamidomethylation]RSQSRSRYYRQRQRSRRRRRRS(C)[Carbamidomethylation]QTRRRAMR(C)[Carbamidomethylation](C)[Carbamidomethylation]RPRYRPR(C)[Carbamidomethylation]RRH.		2	51	[]	[]	[]	[]		31.0095	TP-071	0	P|000	7029.45	-0.142464	P1	P1	Unmod	P1	P|000 → P1
A	R01	A_R01	TP	272	5938000000	32.4673	0.731954	8.0675	7029.62	0.024515	0.024515	P04553	P1	['P1']	ARYRCCRSQSRSRYYRQRQRSRRRRRRSCQTRRRAMRCCRPRYRPRCRRH	M.ARYR(C)[Carbamidomethylation](C)[Carbamidomethylation]RSQSRSRYYRQRQRSRRRRRRS(C)[Carbamidomethylation]QTRRRAMR(C)[Carbamidomethylation](C)[Carbamidomethylation]RPRYRPR(C)[Carbamidomethylation]RRH.		2	51	[]	[]	[]	[]		26.3758	TP-071	0	P|000	7029.45	-0.142464	P1	P1	Unmod	P1	P|000 → P1
B	R03	B_R03	TP	387	5713000000	32.4116	0.938315	11.3817	7029.62	0.025425	0.025425	P04553	P1	['P1']	ARYRCCRSQSRSRYYRQRQRSRRRRRRSCQTRRRAMRCCRPRYRPRCRRH	M.ARYR(C)[Carbamidomethylation](C)[Carbamidomethylation]RSQSRSRYYRQRQRSRRRRRRS(C)[Carbamidomethylation]QTRRRAMR(C)[Carbamidomethylation](C)[Carbamidomethylation]RPRYRPR(C)[Carbamidomethylation]RRH.		2	51	[]	[]	[]	[]		29.5953	TP-071	0	P|000	7029.45	-0.142464	P1	P1	Unmod	P1	P|000 → P1
B	R03	B_R03	TP	703	5713000000	32.4116	0.938315	20.1983	7029.62	0.025895	0.025895	P04554	Unidentified	['pre-P2', 'HPI2', 'HPS1', 'HPS2', 'HP4', 'HP2', 'HP3']	RRHCSRRRLHRIHRRQHRSCRRRKRRSCRHRRRHRRGCRTRKRTCRRH	R.(RRH(C)[Carbamidomethylation]S)[219.0981]RRRLHRIHRRQHRS(C)[Carbamidomethylation]RRRKRRS(C)[Carbamidomethylation]RHRRRHRRG(C)[Carbamidomethylation]RTRKRT(C)[Carbamidomethylation]RRH.		55	102	[]	[]	[]	[]		17.4385	TP-191	0	P|000	7029.45	-0.142464	P1	P1	Unmod	P1	P|000 → P1
A	R01	A_R01	TP	382	5938000000	32.4673	0.731954	11.0968	7029.62	0.026005	0.026005	P04553	P1	['P1']	ARYRCCRSQSRSRYYRQRQRSRRRRRRSCQTRRRAMRCCRPRYRPRCRRH	M.ARYR(C)[Carbamidomethylation](C)[Carbamidomethylation]RSQSRSRYYRQRQRSRRRRRRS(C)[Carbamidomethylation]QTRRRAMR(C)[Carbamidomethylation](C)[Carbamidomethylation]RPRYRPR(C)[Carbamidomethylation]RRH.		2	51	[]	[]	[]	[]		27.0757	TP-071	0	P|000	7029.45	-0.142464	P1	P1	Unmod	P1	P|000 → P1
B	R03	B_R03	TP	259	5713000000	32.4116	0.938315	7.76267	7029.62	0.026535	0.026535	P04553	P1	['P1']	ARYRCCRSQSRSRYYRQRQRSRRRRRRSCQTRRRAMRCCRPRYRPRCRRH	M.ARYR(C)[Carbamidomethylation](C)[Carbamidomethylation]RSQSRSRYYRQRQRSRRRRRRS(C)[Carbamidomethylation]QTRRRAMR(C)[Carbamidomethylation](C)[Carbamidomethylation]RPRYRPR(C)[Carbamidomethylation]RRH.		2	51	[]	[]	[]	[]		25.1253	TP-071	0	P|000	7029.45	-0.142464	P1	P1	Unmod	P1	P|000 → P1
A	R01	A_R01	TP	298	5938000000	32.4673	0.731954	8.8025	7029.62	0.026645	0.026645	P04553	P1	['P1']	ARYRCCRSQSRSRYYRQRQRSRRRRRRSCQTRRRAMRCCRPRYRPRCRRH	M.ARYR(C)[Carbamidomethylation](C)[Carbamidomethylation]RSQSRSRYYRQRQRSRRRRRRS(C)[Carbamidomethylation]QTRRRAMR(C)[Carbamidomethylation](C)[Carbamidomethylation]RPRYRPR(C)[Carbamidomethylation]RRH.		2	51	[]	[]	[]	[]		29.8465	TP-071	0	P|000	7029.45	-0.142464	P1	P1	Unmod	P1	P|000 → P1
B	R03	B_R03	TP	437	5713000000	32.4116	0.938315	12.8388	7029.62	0.026905	0.026905	P04553	P1	['P1']	ARYRCCRSQSRSRYYRQRQRSRRRRRRSCQTRRRAMRCCRPRYRPRCRRH	M.ARYR(C)[Carbamidomethylation](C)[Carbamidomethylation]RSQSRSRYYRQRQRSRRRRRRS(C)[Carbamidomethylation]QTRRRAMR(C)[Carbamidomethylation](C)[Carbamidomethylation]RPRYRPR(C)[Carbamidomethylation]RRH.		2	51	[]	[]	[]	[]		28.5158	TP-071	0	P|000	7029.45	-0.142464	P1	P1	Unmod	P1	P|000 → P1
B	R03	B_R03	TP	743	5713000000	32.4116	0.938315	21.3762	7029.62	0.028065	0.028065	P04553	P1	['P1']	ARYRCCRSQSRSRYYRQRQRSRRRRRRSCQTRRRAMRCCRPRYRPRCRRH	M.ARYR(C)[Carbamidomethylation](C)[Carbamidomethylation]RSQSRSRYYRQRQRSRRRRRRS(C)[Carbamidomethylation]QTRRRAMR(C)[Carbamidomethylation](C)[Carbamidomethylation]RPRYRPR(C)[Carbamidomethylation]RRH.		2	51	[]	[]	[]	[]		24.4524	TP-071	0	P|000	7029.45	-0.142464	P1	P1	Unmod	P1	P|000 → P1
B	R03	B_R03	TP	1053	5713000000	32.4116	0.938315	30.4175	7029.62	0.028565	0.028565	P04553	P1	['P1']	ARYRCCRSQSRSRYYRQRQRSRRRRRRSCQTRRRAMRCCRPRYRPRCRRH	M.ARYR(C)[Carbamidomethylation](C)[Carbamidomethylation]RSQSRSRYYRQRQRSRRRRRRS(C)[Carbamidomethylation]QTRRRAMR(C)[Carbamidomethylation](C)[Carbamidomethylation]RPRYRPR(C)[Carbamidomethylation]RRH.		2	51	[]	[]	[]	[]		23.7523	TP-071	0	P|000	7029.45	-0.142464	P1	P1	Unmod	P1	P|000 → P1
A	R01	A_R01	TP	758	5938000000	32.4673	0.731954	21.639	7029.62	0.028775	0.028775	P04553	P1	['P1']	ARYRCCRSQSRSRYYRQRQRSRRRRRRSCQTRRRAMRCCRPRYRPRCRRH	M.ARYR(C)[Carbamidomethylation](C)[Carbamidomethylation]RSQSRSRYYRQRQRSRRRRRRS(C)[Carbamidomethylation]QTRRRAMR(C)[Carbamidomethylation](C)[Carbamidomethylation]RPRYRPR(C)[Carbamidomethylation]RRH.		2	51	[]	[]	[]	[]		27.4879	TP-071	0	P|000	7029.45	-0.142464	P1	P1	Unmod	P1	P|000 → P1
A	R01	A_R01	TP	802	5938000000	32.4673	0.731954	22.9275	7029.63	0.029735	0.029735	P04554	Unidentified	['pre-P2', 'HPI2', 'HPS1', 'HPS2', 'HP4', 'HP2', 'HP3']	GQSHYRRRHCSRRRLHRIHRRQHRSCRRRKRRSCRHRRRHRRGCRTRKRTC	H.GQSHYRRRH(C)[Carbamidomethylation]SRRRLHRIHRRQHRS(C)[Carbamidomethylation]RRRKRRS((C)[Carbamidomethylation])[-59.9724]RHRRRHRRG(C)[Carbamidomethylation]RTRKRT(C)[Carbamidomethylation].R		49	99	[]	[]	[]	[]		13.2318	TP-191	0	P|000	7029.45	-0.142464	P1	P1	Unmod	P1	P|000 → P1
A	R02	A_R02	TP	307	4005000000	31.8992	0.655946	9.18033	7029.63	0.029855	0.029855	P04553	P1	['P1']	ARYRCCRSQSRSRYYRQRQRSRRRRRRSCQTRRRAMRCCRPRYRPRCRRH	M.ARYR(C)[Carbamidomethylation](C)[Carbamidomethylation]RSQSRSRYYRQRQRSRRRRRRS(C)[Carbamidomethylation]QTRRRAMR(C)[Carbamidomethylation](C)[Carbamidomethylation]RPRYRPR(C)[Carbamidomethylation]RRH.		2	51	[]	[]	[]	[]		30.5947	TP-071	0	P|000	7029.45	-0.142464	P1	P1	Unmod	P1	P|000 → P1
B	R04	B_R04	TP	1169	709800000	29.4028	-0.571492	33.0573	7029.63	0.030005	0.030005	P04553	P1	['P1']	ARYRCCRSQSRSRYYRQRQRSRRRRRRSCQTRRRAMRCCRPRYRPRCRRH	M.ARYR(C)[Carbamidomethylation](C)[Carbamidomethylation]RSQSRSRYYRQRQRSRRRRRRS(C)[Carbamidomethylation]QTRRRAMR(C)[Carbamidomethylation](C)[Carbamidomethylation]RPRYRPR(C)[Carbamidomethylation]RRH.		2	51	[]	[]	[]	[]		26.109	TP-071	0	P|000	7029.45	-0.142464	P1	P1	Unmod	P1	P|000 → P1
B	R03	B_R03	TP	135	5713000000	32.4116	0.938315	4.02533	7029.63	0.031595	0.031595	P04553	P1	['P1']	ARYRCCRSQSRSRYYRQRQRSRRRRRRSCQTRRRAMRCCRPRYRPRCRRH	M.ARYR(C)[Carbamidomethylation](C)[Carbamidomethylation]RSQSRSRYYRQRQRSRRRRRRS(C)[Carbamidomethylation]QTRRRAMR(C)[Carbamidomethylation](C)[Carbamidomethylation]RPRYRPR(C)[Carbamidomethylation]RRH.		2	51	[]	[]	[]	[]		21.1573	TP-071	0	P|000	7029.45	-0.142464	P1	P1	Unmod	P1	P|000 → P1
B	R03	B_R03	TP	197	5713000000	32.4116	0.938315	5.89633	7029.63	0.032505	0.032505	P04553	P1	['P1']	ARYRCCRSQSRSRYYRQRQRSRRRRRRSCQTRRRAMRCCRPRYRPRCRRH	M.ARYR(C)[Carbamidomethylation](C)[Carbamidomethylation]RSQSRSRYYRQRQRSRRRRRRS(C)[Carbamidomethylation]QTRRRAMR(C)[Carbamidomethylation](C)[Carbamidomethylation]RPRYRPR(C)[Carbamidomethylation]RRH.		2	51	[]	[]	[]	[]		22.505	TP-071	0	P|000	7029.45	-0.142464	P1	P1	Unmod	P1	P|000 → P1
B	R04	B_R04	PS	1065	79890.8	16.2857	-0.685071	30.0063	7029.63	0.0339185	0.0339185	Sperm protamine P1	P1	['P1']	ARYRCCRSQSRSRYYRQRQRSRRRRRRSCQTRRRAMRCCRPRYRPRCRRH	ARYRccRSQSRSRYYRQRQRSRRRRRRScQTRRRAMRccRPRYRPRcRRH	C5(Carbamidomethyl); C6(Carbamidomethyl); C29(Carbamidomethyl); C38(Carbamidomethyl); C39(Carbamidomethyl); C47(Carbamidomethyl)	2	51	[]	[]	[]	[]	9999	80.46	PS-008	0	P|000	7029.45	-0.142464	P1	P1	Unmod	P1	P|000 → P1
B	R03	B_R03	PS	743	112412	16.7784	0.187948	21.3762	7029.63	0.0352185	0.0352185	Sperm protamine P1	P1	['P1']	ARYRCCRSQSRSRYYRQRQRSRRRRRRSCQTRRRAMRCCRPRYRPRCRRH	ARYRccRSQSRSRYYRQRQRSRRRRRRScQTRRRAMRccRPRYRPRcRRH	C5(Carbamidomethyl); C6(Carbamidomethyl); C29(Carbamidomethyl); C38(Carbamidomethyl); C39(Carbamidomethyl); C47(Carbamidomethyl)	2	51	[]	[]	[]	[]	9999	81.49	PS-008	0	P|000	7029.45	-0.142464	P1	P1	Unmod	P1	P|000 → P1
B	R04	B_R04	PS	781	241276	17.8803	-0.0572655	21.7351	7029.63	0.0353185	0.0353185	Sperm protamine P1	P1	['P1']	ARYRCCRSQSRSRYYRQRQRSRRRRRRSCQTRRRAMRCCRPRYRPRCRRH	ARYRccRSQSRSRYYRQRQRSRRRRRRScQTRRRAMRccRPRYRPRcRRH	C5(Carbamidomethyl); C6(Carbamidomethyl); C29(Carbamidomethyl); C38(Carbamidomethyl); C39(Carbamidomethyl); C47(Carbamidomethyl)	2	51	[]	[]	[]	[]	9999	108.67	PS-008	0	P|000	7029.45	-0.142464	P1	P1	Unmod	P1	P|000 → P1
B	R04	B_R04	TP	1229	709800000	29.4028	-0.571492	34.8132	7029.65	0.051135	0.051135	P04553	P1	['P1']	ARYRCCRSQSRSRYYRQRQRSRRRRRRSCQTRRRAMRCCRPRYRPRCRRH	M.ARYR(C)[Carbamidomethylation](C)[Carbamidomethylation]RSQSRSRYYRQRQRSRRRRRRS(C)[Carbamidomethylation]QTRRRAMR(C)[Carbamidomethylation](C)[Carbamidomethylation]RPRYRPR(C)[Carbamidomethylation]RRH.		2	51	[]	[]	[]	[]		25.6634	TP-071	0	P|000	7029.45	-0.142464	P1	P1	Unmod	P1	P|000 → P1
B	R03	B_R03	TP	719	5713000000	32.4116	0.938315	20.6688	7030.57	0.978855	0.978855	P04554-2	Unidentified	['pre-P2', 'P2-2']	VRYRVRSLSERSHEVYRQQLHGQEQGHHGQEEQGLSPEHVEVYERTHGQSHYRRRH	M.VRYRVRSLSERSHEVYRQQLHGQEQGHH(GQEEQGLSPEHVEVYERTHGQSHYR)[177.4264]RRH.C		2	57	[]	[]	[]	[]		11.5611	TP-032	0	P|000	7029.45	-0.142464	P1	P1	Unmod	P1	P|000 → P1
B	R04	B_R04	PS	987	40296.8	15.2984	-1.07381	27.7218	7030.59	0.991119	0.991119	Sperm protamine P1	P1	['P1']	ARYRCCRSQSRSRYYRQRQRSRRRRRRSCQTRRRAMRCCRPRYRPRCRRH	ARYRccRSQSRSRYYRQRQRSRRRRRRScQTRRRAMRccRPRYRPRcRRH	C5(Carbamidomethyl); C6(Carbamidomethyl); C29(Carbamidomethyl); C38(Carbamidomethyl); C39(Carbamidomethyl); C47(Carbamidomethyl)	2	51	[]	[]	[]	[]	9999	92.66	PS-008	0	P|000	7029.45	-0.142464	P1	P1	Unmod	P1	P|000 → P1
A	R02	A_R02	PS	413	25667	14.6476	-0.749311	12.2297	7030.59	0.997319	0.997319	Sperm protamine P1	P1	['P1']	ARYRCCRSQSRSRYYRQRQRSRRRRRRSCQTRRRAMRCCRPRYRPRCRRH	ARYRccRSQSRSRYYRQRQRSRRRRRRScQTRRRAMRccRPRYRPRcRRH	C5(Carbamidomethyl); C6(Carbamidomethyl); C29(Carbamidomethyl); C38(Carbamidomethyl); C39(Carbamidomethyl); C47(Carbamidomethyl)	2	51	[]	[]	[]	[]	9999	119.51	PS-008	0	P|000	7029.45	-0.142464	P1	P1	Unmod	P1	P|000 → P1
B	R04	B_R04	TP	1065	709800000	29.4028	-0.571492	30.0063	7030.6	1.00212	1.00212	P04553	P1	['P1']	ARYRCCRSQSRSRYYRQRQRSRRRRRRSCQTRRRAMRCCRPRYRPRCRRH	M.ARYR(C)[Carbamidomethylation](C)[Carbamidomethylation]RSQSRSRYYRQRQRSRRRRRRS(C)[Carbamidomethylation]QTRRRAMR(C)[Carbamidomethylation](C)[Carbamidomethylation]RPRYRPR(C)[Carbamidomethylation]RRH.		2	51	[]	[]	[]	[]		31.7209	TP-071	0	P|000	7029.45	-0.142464	P1	P1	Unmod	P1	P|000 → P1
A	R02	A_R02	PS	179	6044.66	12.5614	-1.61229	5.3778	7030.6	1.00252	1.00252	Sperm protamine P1	P1	['P1']	ARYRCCRSQSRSRYYRQRQRSRRRRRRSCQTRRRAMRCCRPRYRPRCRRH	ARYRccRSQSRSRYYRQRQRSRRRRRRScQTRRRAMRccRPRYRPRcRRH	C5(Carbamidomethyl); C6(Carbamidomethyl); C29(Carbamidomethyl); C38(Carbamidomethyl); C39(Carbamidomethyl); C47(Carbamidomethyl)	2	51	[]	[]	[]	[]	9999	14	PS-008	0	P|000	7029.45	-0.142464	P1	P1	Unmod	P1	P|000 → P1
A	R02	A_R02	TP	405	4005000000	31.8992	0.655946	11.9967	7030.6	1.00362	1.00362	P04553	P1	['P1']	ARYRCCRSQSRSRYYRQRQRSRRRRRRSCQTRRRAMRCCRPRYRPRCRRH	M.ARYR(C)[Carbamidomethylation](C)[Carbamidomethylation]RSQSRSRYYRQRQRSRRRRRRS(C)[Carbamidomethylation]QTRRRAMR(C)[Carbamidomethylation](C)[Carbamidomethylation]RPRYRPR(C)[Carbamidomethylation]RRH.		2	51	[]	[]	[]	[]		40.9984	TP-071	0	P|000	7029.45	-0.142464	P1	P1	Unmod	P1	P|000 → P1
B	R03	B_R03	TP	164	5713000000	32.4116	0.938315	4.90017	7030.6	1.00464	1.00464	P04553	P1	['P1']	ARYRCCRSQSRSRYYRQRQRSRRRRRRSCQTRRRAMRCCRPRYRPRCRRH	M.ARYR(C)[Carbamidomethylation](C)[Carbamidomethylation]RSQSRSRYYRQRQRSRRRRRRS(C)[Carbamidomethylation]QTRRRAMR(C)[Carbamidomethylation](C)[Carbamidomethylation]RPRYRPR(C)[Carbamidomethylation]RRH.		2	51	[]	[]	[]	[]		25.8037	TP-071	0	P|000	7029.45	-0.142464	P1	P1	Unmod	P1	P|000 → P1
B	R03	B_R03	TP	353	5713000000	32.4116	0.938315	10.4255	7030.6	1.0047	1.0047	P04553	P1	['P1']	ARYRCCRSQSRSRYYRQRQRSRRRRRRSCQTRRRAMRCCRPRYRPRCRRH	M.ARYR(C)[Carbamidomethylation](C)[Carbamidomethylation]RSQSRSRYYRQRQRSRRRRRRS(C)[Carbamidomethylation]QTRRRAMR(C)[Carbamidomethylation](C)[Carbamidomethylation]RPRYRPR(C)[Carbamidomethylation]RRH.		2	51	[]	[]	[]	[]		39.0363	TP-071	0	P|000	7029.45	-0.142464	P1	P1	Unmod	P1	P|000 → P1
A	R01	A_R01	TP	406	248700000	27.8898	-0.903444	11.7623	7030.6	1.00478	1.00478	P04553	P1	['P1']	ARYRCCRSQSRSRYYRQRQRSRRRRRRSCQTRRRAMRCCRPRYRPRCRRH	M.ARYR(C)[Carbamidomethylation](C)[Carbamidomethylation]RSQSRSRYYRQRQRSRRRRRRS(C)[Carbamidomethylation]QTRRRAMR(C)[Carbamidomethylation](C)[Carbamidomethylation]RPRYRPR(C)[Carbamidomethylation]RRH.		2	51	[]	[]	[]	[]		43.7665	TP-071	0	P|000	7029.45	-0.142464	P1	P1	Unmod	P1	P|000 → P1
B	R03	B_R03	TP	379	5713000000	32.4116	0.938315	11.1453	7030.6	1.00513	1.00513	P04553	P1	['P1']	ARYRCCRSQSRSRYYRQRQRSRRRRRRSCQTRRRAMRCCRPRYRPRCRRH	M.ARYR(C)[Carbamidomethylation](C)[Carbamidomethylation]RSQSRSRYYRQRQRSRRRRRRS(C)[Carbamidomethylation]QTRRRAMR(C)[Carbamidomethylation](C)[Carbamidomethylation]RPRYRPR(C)[Carbamidomethylation]RRH.		2	51	[]	[]	[]	[]		51.4773	TP-071	0	P|000	7029.45	-0.142464	P1	P1	Unmod	P1	P|000 → P1
A	R02	A_R02	TP	853	4005000000	31.8992	0.655946	24.6303	7030.6	1.00562	1.00562	P04553	P1	['P1']	ARYRCCRSQSRSRYYRQRQRSRRRRRRSCQTRRRAMRCCRPRYRPRCRRH	M.ARYR(C)[Carbamidomethylation](C)[Carbamidomethylation]RSQSRSRYYRQRQRSRRRRRRS(C)[Carbamidomethylation]Q(T)[1.0106]RRRAMR(C)[Carbamidomethylation](C)[Carbamidomethylation]RPRYRPR(C)[Carbamidomethylation]RRH.		2	51	[]	[]	[]	[]		23.8713	TP-071	0	P|000	7029.45	-0.142464	P1	P1	Unmod	P1	P|000 → P1
B	R03	B_R03	TP	293	5713000000	32.4116	0.938315	8.73	7030.6	1.00586	1.00586	P04553	P1	['P1']	ARYRCCRSQSRSRYYRQRQRSRRRRRRSCQTRRRAMRCCRPRYRPRCRRH	M.ARYR(C)[Carbamidomethylation](C)[Carbamidomethylation]RSQSRSRYYRQRQRSRRRRRRS(C)[Carbamidomethylation]QTRRRAMR(C)[Carbamidomethylation](C)[Carbamidomethylation]RPRYRPR(C)[Carbamidomethylation]RRH.		2	51	[]	[]	[]	[]		39.1399	TP-071	0	P|000	7029.45	-0.142464	P1	P1	Unmod	P1	P|000 → P1
B	R03	B_R03	TP	227	5713000000	32.4116	0.938315	6.80033	7030.6	1.00586	1.00586	P04553	P1	['P1']	ARYRCCRSQSRSRYYRQRQRSRRRRRRSCQTRRRAMRCCRPRYRPRCRRH	M.ARYR(C)[Carbamidomethylation](C)[Carbamidomethylation]RSQSRSRYYRQRQRSRRRRRRS(C)[Carbamidomethylation]QTRRRAMR(C)[Carbamidomethylation](C)[Carbamidomethylation]RPRYRPR(C)[Carbamidomethylation]RRH.		2	51	[]	[]	[]	[]		22.3168	TP-071	0	P|000	7029.45	-0.142464	P1	P1	Unmod	P1	P|000 → P1
B	R03	B_R03	PS	379	73559	16.1666	-0.0492746	11.1453	7030.6	1.00592	1.00592	Sperm protamine P1	P1	['P1']	ARYRCCRSQSRSRYYRQRQRSRRRRRRSCQTRRRAMRCCRPRYRPRCRRH	ARYRccRSQSRSRYYRQRQRSRRRRRRScQTRRRAMRccRPRYRPRcRRH	C5(Carbamidomethyl); C6(Carbamidomethyl); C29(Carbamidomethyl); C38(Carbamidomethyl); C39(Carbamidomethyl); C47(Carbamidomethyl)	2	51	[]	[]	[]	[]	9999	110.48	PS-008	0	P|000	7029.45	-0.142464	P1	P1	Unmod	P1	P|000 → P1
B	R04	B_R04	PS	759	76325.7	16.2199	-0.711001	21.0885	7030.6	1.00602	1.00602	Sperm protamine P1	P1	['P1']	ARYRCCRSQSRSRYYRQRQRSRRRRRRSCQTRRRAMRCCRPRYRPRCRRH	ARYRccRSQSRSRYYRQRQRSRRRRRRScQTRRRAMRccRPRYRPRcRRH	C5(Carbamidomethyl); C6(Carbamidomethyl); C29(Carbamidomethyl); C38(Carbamidomethyl); C39(Carbamidomethyl); C47(Carbamidomethyl)	2	51	[]	[]	[]	[]	9999	105.76	PS-008	0	P|000	7029.45	-0.142464	P1	P1	Unmod	P1	P|000 → P1
B	R03	B_R03	TP	269	5713000000	32.4116	0.938315	8.05283	7030.6	1.00659	1.00659	P04553	P1	['P1']	ARYRCCRSQSRSRYYRQRQRSRRRRRRSCQTRRRAMRCCRPRYRPRCRRH	M.ARYR(C)[Carbamidomethylation](C)[Carbamidomethylation]RSQSRSRYYRQRQRSRRRRRRS(C)[Carbamidomethylation]QTRRRAMR(C)[Carbamidomethylation](C)[Carbamidomethylation]RPRYRPR(C)[Carbamidomethylation]RRH.		2	51	[]	[]	[]	[]		37.7537	TP-071	0	P|000	7029.45	-0.142464	P1	P1	Unmod	P1	P|000 → P1
B	R03	B_R03	TP	425	5713000000	32.4116	0.938315	12.49	7030.6	1.00682	1.00682	P04553	P1	['P1']	ARYRCCRSQSRSRYYRQRQRSRRRRRRSCQTRRRAMRCCRPRYRPRCRRH	M.ARYR(C)[Carbamidomethylation](C)[Carbamidomethylation]RSQSRSRYYRQRQRSRRRRRRS(C)[Carbamidomethylation]QTRRRAMR(C)[Carbamidomethylation](C)[Carbamidomethylation]RPRYRPR(C)[Carbamidomethylation]RRH.		2	51	[]	[]	[]	[]		44.7704	TP-071	0	P|000	7029.45	-0.142464	P1	P1	Unmod	P1	P|000 → P1
A	R01	A_R01	TP	416	248700000	27.8898	-0.903444	12.053	7030.6	1.00698	1.00698	P04553	P1	['P1']	ARYRCCRSQSRSRYYRQRQRSRRRRRRSCQTRRRAMRCCRPRYRPRCRRH	M.ARYR(C)[Carbamidomethylation](C)[Carbamidomethylation]RSQSRSRYYRQRQRSRRRRRRS(C)[Carbamidomethylation]QTRRRAMR(C)[Carbamidomethylation](C)[Carbamidomethylation]RPRYRPR(C)[Carbamidomethylation]RRH.		2	51	[]	[]	[]	[]		48.1887	TP-071	0	P|000	7029.45	-0.142464	P1	P1	Unmod	P1	P|000 → P1
A	R02	A_R02	TP	403	4005000000	31.8992	0.655946	11.9383	7030.6	1.00863	1.00863	P04553	P1	['P1']	ARYRCCRSQSRSRYYRQRQRSRRRRRRSCQTRRRAMRCCRPRYRPRCRRH	M.ARYR(C)[Carbamidomethylation](C)[Carbamidomethylation]RSQSRSRYYRQRQRSRRRRRRS(C)[Carbamidomethylation]QTRRRAMR(C)[Carbamidomethylation](C)[Carbamidomethylation]RPRYRPR(C)[Carbamidomethylation]RRH.		2	51	[]	[]	[]	[]		35.0112	TP-071	0	P|000	7029.45	-0.142464	P1	P1	Unmod	P1	P|000 → P1
B	R03	B_R03	TP	407	5713000000	32.4116	0.938315	11.9618	7030.6	1.00878	1.00878	P04553	P1	['P1']	ARYRCCRSQSRSRYYRQRQRSRRRRRRSCQTRRRAMRCCRPRYRPRCRRH	M.ARYR(C)[Carbamidomethylation](C)[Carbamidomethylation]RSQSRSRYYRQRQRSRRRRRRS(C)[Carbamidomethylation]QTRRRAMR(C)[Carbamidomethylation](C)[Carbamidomethylation]RPRYRPR(C)[Carbamidomethylation]RRH.		2	51	[]	[]	[]	[]		43.0892	TP-071	0	P|000	7029.45	-0.142464	P1	P1	Unmod	P1	P|000 → P1
A	R02	A_R02	PS	805	22628	14.4658	-0.824516	23.2344	7030.61	1.01122	1.01122	Sperm protamine P1	P1	['P1']	ARYRCCRSQSRSRYYRQRQRSRRRRRRSCQTRRRAMRCCRPRYRPRCRRH	ARYRccRSQSRSRYYRQRQRSRRRRRRScQTRRRAMRccRPRYRPRcRRH	C5(Carbamidomethyl); C6(Carbamidomethyl); C29(Carbamidomethyl); C38(Carbamidomethyl); C39(Carbamidomethyl); C47(Carbamidomethyl)	2	51	[]	[]	[]	[]	9999	93.17	PS-008	0	P|000	7029.45	-0.142464	P1	P1	Unmod	P1	P|000 → P1
B	R04	B_R04	TP	855	709800000	29.4028	-0.571492	23.9148	7030.61	1.0118	1.0118	P04553	P1	['P1']	ARYRCCRSQSRSRYYRQRQRSRRRRRRSCQTRRRAMRCCRPRYRPRCRRH	M.ARYR(C)[Carbamidomethylation](C)[Carbamidomethylation]RSQSRSRYYRQRQRSRRRRRRS(C)[Carbamidomethylation]QTRRRAMR(C)[Carbamidomethylation](C)[Carbamidomethylation]RPRYRPR(C)[Carbamidomethylation]RRH.		2	51	[]	[]	[]	[]		36.6015	TP-071	0	P|000	7029.45	-0.142464	P1	P1	Unmod	P1	P|000 → P1
A	R01	A_R01	TP	604	5938000000	32.4673	0.731954	17.1548	7030.61	1.0118	1.0118	P04554	Unidentified	['pre-P2', 'HPI2', 'HPS1', 'HPS2', 'HP4', 'HP2', 'HP3']	RRRHCSRRRLHRIHRRQHRSCRRRKRRSCRHRRRHRRGCRTRKRTCRRH	Y.(RRRH(C)[Carbamidomethylation]SRRRLHRIHRRQHRS(C)[Carbamidomethylation]R)[63.9829]RRKRRS(C)[Carbamidomethylation]RHRRRHRRG(C)[Carbamidomethylation]RTRKRT(C)[Carbamidomethylation]RRH.		54	102	[]	[]	[]	[]		9.47982	TP-191	0	P|000	7029.45	-0.142464	P1	P1	Unmod	P1	P|000 → P1
B	R03	B_R03	TP	323	5713000000	32.4116	0.938315	9.58783	7030.61	1.01194	1.01194	P04553	P1	['P1']	ARYRCCRSQSRSRYYRQRQRSRRRRRRSCQTRRRAMRCCRPRYRPRCRRH	M.ARYR(C)[Carbamidomethylation](C)[Carbamidomethylation]RSQSRSRYYRQRQRSRRRRRRS(C)[Carbamidomethylation]QTRRRAMR(C)[Carbamidomethylation](C)[Carbamidomethylation]RPRYRPR(C)[Carbamidomethylation]RRH.		2	51	[]	[]	[]	[]		41.118	TP-071	0	P|000	7029.45	-0.142464	P1	P1	Unmod	P1	P|000 → P1
B	R03	B_R03	TP	125	5713000000	32.4116	0.938315	3.724	7030.61	1.01208	1.01208	P04553	P1	['P1']	ARYRCCRSQSRSRYYRQRQRSRRRRRRSCQTRRRAMRCCRPRYRPRCRRH	M.ARYR(C)[Carbamidomethylation](C)[Carbamidomethylation]RSQSRSRYYRQRQRSRRRRRRS(C)[Carbamidomethylation](Q)[1.0071]TRRRAMR(C)[Carbamidomethylation](C)[Carbamidomethylation]RPRYRPR(C)[Carbamidomethylation]RRH.		2	51	[]	[]	[]	[]		22.4321	TP-071	0	P|000	7029.45	-0.142464	P1	P1	Unmod	P1	P|000 → P1
A	R02	A_R02	TP	447	4005000000	31.8992	0.655946	13.2255	7030.61	1.01264	1.01264	P04553	P1	['P1']	ARYRCCRSQSRSRYYRQRQRSRRRRRRSCQTRRRAMRCCRPRYRPRCRRH	M.ARYR(C)[Carbamidomethylation](C)[Carbamidomethylation]RSQSRSRYYRQRQRSRRRRRRS(C)[Carbamidomethylation](Q)[1.0076]TRRRAMR(C)[Carbamidomethylation](C)[Carbamidomethylation]RPRYRPR(C)[Carbamidomethylation]RRH.		2	51	[]	[]	[]	[]		24.2011	TP-071	0	P|000	7029.45	-0.142464	P1	P1	Unmod	P1	P|000 → P1
B	R04	B_R04	TP	781	709800000	29.4028	-0.571492	21.7352	7030.61	1.01276	1.01276	P04553	P1	['P1']	ARYRCCRSQSRSRYYRQRQRSRRRRRRSCQTRRRAMRCCRPRYRPRCRRH	M.ARYR(C)[Carbamidomethylation](C)[Carbamidomethylation]RSQSRSRYYRQRQRSRRRRRRS(C)[Carbamidomethylation]QTRRRAMR(C)[Carbamidomethylation](C)[Carbamidomethylation]RPRYRPR(C)[Carbamidomethylation]RRH.		2	51	[]	[]	[]	[]		35.3495	TP-071	0	P|000	7029.45	-0.142464	P1	P1	Unmod	P1	P|000 → P1
B	R04	B_R04	TP	1281	709800000	29.4028	-0.571492	36.3357	7030.61	1.01318	1.01318	P04553	P1	['P1']	ARYRCCRSQSRSRYYRQRQRSRRRRRRSCQTRRRAMRCCRPRYRPRCRRH	M.ARYR(C)[Carbamidomethylation](C)[Carbamidomethylation]RSQSRSRYYRQRQRSRRRRRRS(C)[Carbamidomethylation]QTRRRAMR(C)[Carbamidomethylation](C)[Carbamidomethylation]RPRYRPR(C)[Carbamidomethylation]RRH.		2	51	[]	[]	[]	[]		40.4723	TP-071	0	P|000	7029.45	-0.142464	P1	P1	Unmod	P1	P|000 → P1
A	R02	A_R02	TP	93	4005000000	31.8992	0.655946	2.778	7030.61	1.01343	1.01343	P04553	P1	['P1']	ARYRCCRSQSRSRYYRQRQRSRRRRRRSCQTRRRAMRCCRPRYRPRCRRH	M.ARYR(C)[Carbamidomethylation](C)[Carbamidomethylation]RSQSRSRYYRQRQRSRRRRRRS(C)[Carbamidomethylation]QTRRRAMR(C)[Carbamidomethylation](C)[Carbamidomethylation]RPRYRPR(C)[Carbamidomethylation]RRH.		2	51	[]	[]	[]	[]		14.8271	TP-071	0	P|000	7029.45	-0.142464	P1	P1	Unmod	P1	P|000 → P1
B	R03	B_R03	PS	86	2487.68	11.2806	-1.94375	2.5479	7030.61	1.01352	1.01352	Sperm protamine P1	P1	['P1']	ARYRCCRSQSRSRYYRQRQRSRRRRRRSCQTRRRAMRCCRPRYRPRCRRH	ARYRccRSQSRSRYYRQRQRSRRRRRRScQTRRRAMRccRPRYRPRcRRH	C5(Carbamidomethyl); C6(Carbamidomethyl); C29(Carbamidomethyl); C38(Carbamidomethyl); C39(Carbamidomethyl); C47(Carbamidomethyl)	2	51	[]	[]	[]	[]	9999	57.9	PS-008	0	P|000	7029.45	-0.142464	P1	P1	Unmod	P1	P|000 → P1
B	R03	B_R03	TP	38	5713000000	32.4116	0.938315	1.1055	7030.61	1.01397	1.01397	P04553	P1	['P1']	ARYRCCRSQSRSRYYRQRQRSRRRRRRSCQTRRRAMRCCRPRYRPRCRRH	M.ARYR(C)[Carbamidomethylation](C)[Carbamidomethylation]RSQSRS(RYYRQRQRSRRRRRRS(C)[Carbamidomethylation]QT)[1.2240]RRRAMR(C)[Carbamidomethylation](C)[Carbamidomethylation]RPRYRPR(C)[Carbamidomethylation]RRH.		2	51	[]	[]	[]	[]		9.53161	TP-071	0	P|000	7029.45	-0.142464	P1	P1	Unmod	P1	P|000 → P1
A	R02	A_R02	TP	199	4005000000	31.8992	0.655946	5.98283	7030.61	1.01402	1.01402	P04553	P1	['P1']	ARYRCCRSQSRSRYYRQRQRSRRRRRRSCQTRRRAMRCCRPRYRPRCRRH	M.ARYR(C)[Carbamidomethylation](C)[Carbamidomethylation]RSQSRSRYYRQRQRSRR(RRRRS(C)[Carbamidomethylation]QT)[1.0190]RRRAMR(C)[Carbamidomethylation](C)[Carbamidomethylation]RPRYRPR(C)[Carbamidomethylation]RRH.		2	51	[]	[]	[]	[]		15.3824	TP-071	0	P|000	7029.45	-0.142464	P1	P1	Unmod	P1	P|000 → P1
B	R04	B_R04	PS	1067	118673	16.8566	-0.460304	30.0648	7030.61	1.01402	1.01402	Sperm protamine P1	P1	['P1']	ARYRCCRSQSRSRYYRQRQRSRRRRRRSCQTRRRAMRCCRPRYRPRCRRH	ARYRccRSQSRSRYYRQRQRSRRRRRRScQTRRRAMRccRPRYRPRcRRH	C5(Carbamidomethyl); C6(Carbamidomethyl); C29(Carbamidomethyl); C38(Carbamidomethyl); C39(Carbamidomethyl); C47(Carbamidomethyl)	2	51	[]	[]	[]	[]	9999	95.7	PS-008	0	P|000	7029.45	-0.142464	P1	P1	Unmod	P1	P|000 → P1
A	R02	A_R02	TP	159	4005000000	31.8992	0.655946	4.773	7030.61	1.01411	1.01411	P04553	P1	['P1']	ARYRCCRSQSRSRYYRQRQRSRRRRRRSCQTRRRAMRCCRPRYRPRCRRH	M.ARYR(C)[Carbamidomethylation](C)[Carbamidomethylation]RSQSRSRYYRQRQRSRRRRRRS(C)[Carbamidomethylation]QTRRRAMR(C)[Carbamidomethylation](C)[Carbamidomethylation]RPRYRPR(C)[Carbamidomethylation]RRH.		2	51	[]	[]	[]	[]		12.7443	TP-071	0	P|000	7029.45	-0.142464	P1	P1	Unmod	P1	P|000 → P1
A	R02	A_R02	TP	41	4005000000	31.8992	0.655946	1.204	7030.61	1.01447	1.01447	P04553	P1	['P1']	ARYRCCRSQSRSRYYRQRQRSRRRRRRSCQTRRRAMRCCRPRYRPRCRRH	M.ARYR(C)[Carbamidomethylation](C)[Carbamidomethylation]RSQSRSRYYRQRQRSRRRRRRS(C)[Carbamidomethylation]QTRRRAMR(C)[Carbamidomethylation](C)[Carbamidomethylation]RPRYRPR(C)[Carbamidomethylation]RRH.		2	51	[]	[]	[]	[]		13.1943	TP-071	0	P|000	7029.45	-0.142464	P1	P1	Unmod	P1	P|000 → P1
A	R02	A_R02	TP	239	4005000000	31.8992	0.655946	7.19417	7030.61	1.01451	1.01451	P04553	P1	['P1']	ARYRCCRSQSRSRYYRQRQRSRRRRRRSCQTRRRAMRCCRPRYRPRCRRH	M.ARYR(C)[Carbamidomethylation](C)[Carbamidomethylation]RSQSRSRYYRQRQRSRRRRRRS(C)[Carbamidomethylation]QTRRR(AM)[1.0145]R(C)[Carbamidomethylation](C)[Carbamidomethylation]RPRYRPR(C)[Carbamidomethylation]RRH.		2	51	[]	[]	[]	[]		10.6813	TP-071	0	P|000	7029.45	-0.142464	P1	P1	Unmod	P1	P|000 → P1
B	R03	B_R03	TP	1229	5713000000	32.4116	0.938315	35.5535	7030.61	1.0157	1.0157	P04553	P1	['P1']	ARYRCCRSQSRSRYYRQRQRSRRRRRRSCQTRRRAMRCCRPRYRPRCRRH	M.ARYR(C)[Carbamidomethylation](C)[Carbamidomethylation]RSQSRSRYYRQRQRSRRRRRRS(C)[Carbamidomethylation]QTRRRAMR(C)[Carbamidomethylation](C)[Carbamidomethylation]RPRYRPR(C)[Carbamidomethylation]RRH.		2	51	[]	[]	[]	[]		25.4958	TP-071	0	P|000	7029.45	-0.142464	P1	P1	Unmod	P1	P|000 → P1
B	R03	B_R03	TP	64	5713000000	32.4116	0.938315	1.88483	7030.61	1.01643	1.01643	P04553	P1	['P1']	ARYRCCRSQSRSRYYRQRQRSRRRRRRSCQTRRRAMRCCRPRYRPRCRRH	M.ARYR(C)[Carbamidomethylation](C)[Carbamidomethylation]RSQSRSRYYRQRQRSRRRRRRS(C)[Carbamidomethylation](Q)[1.0064]TRRRAMR(C)[Carbamidomethylation](C)[Carbamidomethylation]RPRYRPR(C)[Carbamidomethylation]RRH.		2	51	[]	[]	[]	[]		25.0033	TP-071	0	P|000	7029.45	-0.142464	P1	P1	Unmod	P1	P|000 → P1
B	R03	B_R03	TP	86	5713000000	32.4116	0.938315	2.54783	7030.61	1.01692	1.01692	P04553	P1	['P1']	ARYRCCRSQSRSRYYRQRQRSRRRRRRSCQTRRRAMRCCRPRYRPRCRRH	M.ARYR(C)[Carbamidomethylation](C)[Carbamidomethylation]RSQSRSRYYRQRQRSRRRRRRS(C)[Carbamidomethylation]QTRRRAMR(C)[Carbamidomethylation](C)[Carbamidomethylation]RPRYRPR(C)[Carbamidomethylation]RRH.		2	51	[]	[]	[]	[]		22.9464	TP-071	0	P|000	7029.45	-0.142464	P1	P1	Unmod	P1	P|000 → P1
B	R04	B_R04	PS	809	201293	17.6189	-0.160177	22.561	7030.61	1.01692	1.01692	Sperm protamine P1	P1	['P1']	ARYRCCRSQSRSRYYRQRQRSRRRRRRSCQTRRRAMRCCRPRYRPRCRRH	ARYRccRSQSRSRYYRQRQRSRRRRRRScQTRRRAMRccRPRYRPRcRRH	C5(Carbamidomethyl); C6(Carbamidomethyl); C29(Carbamidomethyl); C38(Carbamidomethyl); C39(Carbamidomethyl); C47(Carbamidomethyl)	2	51	[]	[]	[]	[]	9999	97.63	PS-008	0	P|000	7029.45	-0.142464	P1	P1	Unmod	P1	P|000 → P1
B	R03	B_R03	TP	107	5713000000	32.4116	0.938315	3.18083	7030.61	1.01695	1.01695	P04553	P1	['P1']	ARYRCCRSQSRSRYYRQRQRSRRRRRRSCQTRRRAMRCCRPRYRPRCRRH	M.ARYR(C)[Carbamidomethylation](C)[Carbamidomethylation]RSQSRSRYYRQRQRSRRRRRRS(C)[Carbamidomethylation]QTRRRAMR(C)[Carbamidomethylation](C)[Carbamidomethylation]RPRYRPR(C)[Carbamidomethylation]RRH.		2	51	[]	[]	[]	[]		26.523	TP-071	0	P|000	7029.45	-0.142464	P1	P1	Unmod	P1	P|000 → P1
B	R03	B_R03	TP	156	5713000000	32.4116	0.938315	4.65833	7030.61	1.0171	1.0171	P04553	P1	['P1']	ARYRCCRSQSRSRYYRQRQRSRRRRRRSCQTRRRAMRCCRPRYRPRCRRH	M.ARYR(C)[Carbamidomethylation](C)[Carbamidomethylation]RSQSRSRYYRQRQRSRRRRRRS(C)[Carbamidomethylation]QTRRRAMR(C)[Carbamidomethylation](C)[Carbamidomethylation]RPRYRPR(C)[Carbamidomethylation]RRH.		2	51	[]	[]	[]	[]		28.384	TP-071	0	P|000	7029.45	-0.142464	P1	P1	Unmod	P1	P|000 → P1
A	R02	A_R02	TP	779	4005000000	31.8992	0.655946	22.4717	7030.61	1.01716	1.01716	P04553	P1	['P1']	ARYRCCRSQSRSRYYRQRQRSRRRRRRSCQTRRRAMRCCRPRYRPRCRRH	M.ARYR(C)[Carbamidomethylation](C)[Carbamidomethylation]RSQSRSRYYRQRQRSRRRRRRS(C)[Carbamidomethylation](Q)[1.0121]TRRRAMR(C)[Carbamidomethylation](C)[Carbamidomethylation]RPRYRPR(C)[Carbamidomethylation]RRH.		2	51	[]	[]	[]	[]		23.6202	TP-071	0	P|000	7029.45	-0.142464	P1	P1	Unmod	P1	P|000 → P1
A	R02	A_R02	TP	805	4005000000	31.8992	0.655946	23.2343	7030.61	1.01735	1.01735	P04553	P1	['P1']	ARYRCCRSQSRSRYYRQRQRSRRRRRRSCQTRRRAMRCCRPRYRPRCRRH	M.ARYR(C)[Carbamidomethylation](C)[Carbamidomethylation]RSQSRSRYYRQRQRSRRRRRRS(C)[Carbamidomethylation]QTRRRAMR(C)[Carbamidomethylation](C)[Carbamidomethylation]RPRYRPR(C)[Carbamidomethylation]RRH.		2	51	[]	[]	[]	[]		28.7125	TP-071	0	P|000	7029.45	-0.142464	P1	P1	Unmod	P1	P|000 → P1
B	R03	B_R03	TP	239	5713000000	32.4116	0.938315	7.1605	7030.61	1.01825	1.01825	P04553	P1	['P1']	ARYRCCRSQSRSRYYRQRQRSRRRRRRSCQTRRRAMRCCRPRYRPRCRRH	M.ARYR(C)[Carbamidomethylation](C)[Carbamidomethylation]RSQSRSRYYRQRQRSRRRRRRS(C)[Carbamidomethylation]QTRRRAMR(C)[Carbamidomethylation](C)[Carbamidomethylation]RPRYRPR(C)[Carbamidomethylation]RRH.		2	51	[]	[]	[]	[]		22.3674	TP-071	0	P|000	7029.45	-0.142464	P1	P1	Unmod	P1	P|000 → P1
B	R03	B_R03	TP	21	5713000000	32.4116	0.938315	0.601667	7030.61	1.01832	1.01832	P04553	P1	['P1']	ARYRCCRSQSRSRYYRQRQRSRRRRRRSCQTRRRAMRCCRPRYRPRCRRH	M.ARYR(C)[Carbamidomethylation](C)[Carbamidomethylation]RSQSRSRYYRQRQR(S)[1.0033]RRRRRRS(C)[Carbamidomethylation]QTRRRAMR(C)[Carbamidomethylation](C)[Carbamidomethylation]RPRYRPR(C)[Carbamidomethylation]RRH.		2	51	[]	[]	[]	[]		19.3655	TP-071	0	P|000	7029.45	-0.142464	P1	P1	Unmod	P1	P|000 → P1
A	R02	A_R02	TP	1055	4005000000	31.8992	0.655946	30.5102	7030.61	1.01833	1.01833	P04553	P1	['P1']	ARYRCCRSQSRSRYYRQRQRSRRRRRRSCQTRRRAMRCCRPRYRPRCRRH	M.ARYR(C)[Carbamidomethylation](C)[Carbamidomethylation]RSQSRSRYYRQRQRSRRRRRRS(C)[Carbamidomethylation]QTRRRAMR(C)[Carbamidomethylation](C)[Carbamidomethylation]RPRYRPR(C)[Carbamidomethylation]RRH.		2	51	[]	[]	[]	[]		28.6024	TP-071	0	P|000	7029.45	-0.142464	P1	P1	Unmod	P1	P|000 → P1
B	R03	B_R03	TP	43	5713000000	32.4116	0.938315	1.254	7030.61	1.01872	1.01872	P04553	P1	['P1']	ARYRCCRSQSRSRYYRQRQRSRRRRRRSCQTRRRAMRCCRPRYRPRCRRH	M.ARYR(C)[Carbamidomethylation](C)[Carbamidomethylation]RSQSRSRYYRQRQRSRRRRRRS(C)[Carbamidomethylation](Q)[1.0137]TRRRAMR(C)[Carbamidomethylation](C)[Carbamidomethylation]RPRYRPR(C)[Carbamidomethylation]RRH.		2	51	[]	[]	[]	[]		23.4567	TP-071	0	P|000	7029.45	-0.142464	P1	P1	Unmod	P1	P|000 → P1
A	R02	A_R02	TP	191	4005000000	31.8992	0.655946	5.73917	7030.62	1.01989	1.01989	P04553	P1	['P1']	ARYRCCRSQSRSRYYRQRQRSRRRRRRSCQTRRRAMRCCRPRYRPRCRRH	M.ARYR(C)[Carbamidomethylation](C)[Carbamidomethylation]RSQSRSRYYRQRQRSRRRRRRS(C)[Carbamidomethylation]QTRRRAMR(C)[Carbamidomethylation](C)[Carbamidomethylation]RPRYRPR(C)[Carbamidomethylation]RRH.		2	51	[]	[]	[]	[]		22.0838	TP-071	0	P|000	7029.45	-0.142464	P1	P1	Unmod	P1	P|000 → P1
A	R02	A_R02	TP	112	4005000000	31.8992	0.655946	3.35283	7030.62	1.01996	1.01996	P04553	P1	['P1']	ARYRCCRSQSRSRYYRQRQRSRRRRRRSCQTRRRAMRCCRPRYRPRCRRH	M.ARYR(C)[Carbamidomethylation](C)[Carbamidomethylation]RSQSRSRYYRQRQRSRRRRRRS(C)[Carbamidomethylation]QTRRRAMR(C)[Carbamidomethylation](C)[Carbamidomethylation]RPRYRPR(C)[Carbamidomethylation]RRH.		2	51	[]	[]	[]	[]		22.1776	TP-071	0	P|000	7029.45	-0.142464	P1	P1	Unmod	P1	P|000 → P1
A	R02	A_R02	TP	1337	4005000000	31.8992	0.655946	38.709	7030.62	1.02117	1.02117	P04553	P1	['P1']	ARYRCCRSQSRSRYYRQRQRSRRRRRRSCQTRRRAMRCCRPRYRPRCRRH	M.ARYR(C)[Carbamidomethylation](C)[Carbamidomethylation]RSQSRSRYYRQRQRSRRRRRRS((C)[Carbamidomethylation])[1.0062]QTRRRAMR(C)[Carbamidomethylation](C)[Carbamidomethylation]RPRYRPR(C)[Carbamidomethylation]RRH.		2	51	[]	[]	[]	[]		22.6824	TP-071	0	P|000	7029.45	-0.142464	P1	P1	Unmod	P1	P|000 → P1
A	R01	A_R01	TP	380	5938000000	32.4673	0.731954	11.0473	7030.62	1.02214	1.02214	P04553	P1	['P1']	ARYRCCRSQSRSRYYRQRQRSRRRRRRSCQTRRRAMRCCRPRYRPRCRRH	M.ARYR(C)[Carbamidomethylation](C)[Carbamidomethylation]RSQSRSRYYRQRQRSRRRRRRS(C)[Carbamidomethylation]QTRRRAMR(C)[Carbamidomethylation](C)[Carbamidomethylation]RPRYRPR(C)[Carbamidomethylation]RRH.		2	51	[]	[]	[]	[]		37.2805	TP-071	0	P|000	7029.45	-0.142464	P1	P1	Unmod	P1	P|000 → P1
B	R04	B_R04	TP	1195	709800000	29.4028	-0.571492	33.8158	7030.62	1.02475	1.02475	P04553	P1	['P1']	ARYRCCRSQSRSRYYRQRQRSRRRRRRSCQTRRRAMRCCRPRYRPRCRRH	M.ARYR(C)[Carbamidomethylation](C)[Carbamidomethylation]RSQSRSRYYRQRQRSRRRRRRS(C)[Carbamidomethylation]QTRRRAMR(C)[Carbamidomethylation](C)[Carbamidomethylation]RPRYRPR(C)[Carbamidomethylation]RRH.		2	51	[]	[]	[]	[]		29.827	TP-071	0	P|000	7029.45	-0.142464	P1	P1	Unmod	P1	P|000 → P1
B	R03	B_R03	TP	185	5713000000	32.4116	0.938315	5.5335	7030.62	1.02657	1.02657	P04553	P1	['P1']	ARYRCCRSQSRSRYYRQRQRSRRRRRRSCQTRRRAMRCCRPRYRPRCRRH	M.ARYR(C)[Carbamidomethylation](C)[Carbamidomethylation]RSQSRSRYYRQRQRSRRRRR(R)[1.0016]S(C)[Carbamidomethylation]QTRRRAMR(C)[Carbamidomethylation](C)[Carbamidomethylation]RPRYRPR(C)[Carbamidomethylation]RRH.		2	51	[]	[]	[]	[]		21.7213	TP-071	0	P|000	7029.45	-0.142464	P1	P1	Unmod	P1	P|000 → P1
B	R03	B_R03	TP	331	5713000000	32.4116	0.938315	9.81483	7030.62	1.02718	1.02718	P04553	P1	['P1']	ARYRCCRSQSRSRYYRQRQRSRRRRRRSCQTRRRAMRCCRPRYRPRCRRH	M.ARYR(C)[Carbamidomethylation](C)[Carbamidomethylation]RSQSRSRYYRQRQRSRRRRRRS(C)[Carbamidomethylation]QTRRRAMR(C)[Carbamidomethylation](C)[Carbamidomethylation]RPRYRPR(C)[Carbamidomethylation]RRH.		2	51	[]	[]	[]	[]		46.2835	TP-071	0	P|000	7029.45	-0.142464	P1	P1	Unmod	P1	P|000 → P1
A	R02	A_R02	TP	413	4005000000	31.8992	0.655946	12.2297	7030.63	1.03308	1.03308	P04553	P1	['P1']	ARYRCCRSQSRSRYYRQRQRSRRRRRRSCQTRRRAMRCCRPRYRPRCRRH	M.ARYR(C)[Carbamidomethylation](C)[Carbamidomethylation]RSQSRSRYYR(Q)[1.0081]RQRSRRRRRRS(C)[Carbamidomethylation]QTRRRAMR(C)[Carbamidomethylation](C)[Carbamidomethylation]RPRYRPR(C)[Carbamidomethylation]RRH.		2	51	[]	[]	[]	[]		28.9454	TP-071	0	P|000	7029.45	-0.142464	P1	P1	Unmod	P1	P|000 → P1
B	R04	B_R04	TP	1149	709800000	29.4028	-0.571492	32.4738	7030.63	1.03679	1.03679	P04553	P1	['P1']	ARYRCCRSQSRSRYYRQRQRSRRRRRRSCQTRRRAMRCCRPRYRPRCRRH	M.ARYR(C)[Carbamidomethylation](C)[Carbamidomethylation]RSQSRSRYYRQRQRSRRRRRRS(C)[Carbamidomethylation]QTRRRAMR(C)[Carbamidomethylation](C)[Carbamidomethylation]RPRYRPR(C)[Carbamidomethylation]RRH.		2	51	[]	[]	[]	[]		41.9302	TP-071	0	P|000	7029.45	-0.142464	P1	P1	Unmod	P1	P|000 → P1
A	R02	A_R02	PS	405	85803	16.3887	-0.0290743	11.9967	7031.59	1.99142	1.99142	Sperm protamine P1	P1	['P1']	ARYRCCRSQSRSRYYRQRQRSRRRRRRSCQTRRRAMRCCRPRYRPRCRRH	ARYRccRSQSRSRYYRQRQRSRRRRRRScQTRRRAMRccRPRYRPRcRRH	C5(Carbamidomethyl); C6(Carbamidomethyl); C29(Carbamidomethyl); C38(Carbamidomethyl); C39(Carbamidomethyl); C47(Carbamidomethyl)	2	51	[]	[]	[]	[]	460.963	117.86	PS-008	0	P|000	7029.45	-0.142464	P1	P1	Unmod	P1	P|000 → P1
B	R03	B_R03	TP	763	5713000000	32.4116	0.938315	21.9632	7031.59	1.99264	1.99264	P04553	P1	['P1']	ARYRCCRSQSRSRYYRQRQRSRRRRRRSCQTRRRAMRCCRPRYRPRCRRH	M.ARYR(C)[Carbamidomethylation](C)[Carbamidomethylation]RSQSRS(R)[2.0226]YYRQRQRSRRRRRRS(C)[Carbamidomethylation]QTRRRAMR(C)[Carbamidomethylation](C)[Carbamidomethylation]RPRYRPR(C)[Carbamidomethylation]RRH.		2	51	[]	[]	[]	[]		27.3038	TP-071	0	P|000	7029.45	-0.142464	P1	P1	Unmod	P1	P|000 → P1
A	R01	A_R01	TP	808	5938000000	32.4673	0.731954	23.1022	7031.59	1.9932	1.9932	P04553	P1	['P1']	ARYRCCRSQSRSRYYRQRQRSRRRRRRSCQTRRRAMRCCRPRYRPRCRRH	M.ARYR(C)[Carbamidomethylation](C)[Carbamidomethylation]RSQSRS(RY)[2.0232]YRQRQRSRRRRRRS(C)[Carbamidomethylation]QTRRRAMR(C)[Carbamidomethylation](C)[Carbamidomethylation]RPRYRPR(C)[Carbamidomethylation]RRH.		2	51	[]	[]	[]	[]		24.3247	TP-027	0	P|000	7029.45	-0.142464	P1	P1	Unmod	P1	P|000 → P1
B	R03	B_R03	PS	86	6705.64	12.7112	-1.38907	2.5479	7031.6	2.00842	2.00842	Sperm protamine P1	P1	['P1']	ARYRCCRSQSRSRYYRQRQRSRRRRRRSCQTRRRAMRCCRPRYRPRCRRH	ARYRccRSQSRSRYYRQRQRSRRRRRRScQTRRRAMRccRPRYRPRcRRH	C5(Carbamidomethyl); C6(Carbamidomethyl); C29(Carbamidomethyl); C38(Carbamidomethyl); C39(Carbamidomethyl); C47(Carbamidomethyl)	2	51	[]	[]	[]	[]	310.077	49.65	PS-008	0	P|000	7029.45	-0.142464	P1	P1	Unmod	P1	P|000 → P1
A	R02	A_R02	PS	112	4203.46	12.0374	-1.82908	3.3529	7031.61	2.01152	2.01152	Sperm protamine P1	P1	['P1']	ARYRCCRSQSRSRYYRQRQRSRRRRRRSCQTRRRAMRCCRPRYRPRCRRH	ARYRccRSQSRSRYYRQRQRSRRRRRRScQTRRRAMRccRPRYRPRcRRH	C5(Carbamidomethyl); C6(Carbamidomethyl); C29(Carbamidomethyl); C38(Carbamidomethyl); C39(Carbamidomethyl); C47(Carbamidomethyl)	2	51	[]	[]	[]	[]	409.882	64	PS-008	0	P|000	7029.45	-0.142464	P1	P1	Unmod	P1	P|000 → P1
B	R03	B_R03	PS	176	4582.46	12.1619	-1.60203	5.2631	7031.61	2.01162	2.01162	Sperm protamine P1	P1	['P1']	ARYRCCRSQSRSRYYRQRQRSRRRRRRSCQTRRRAMRCCRPRYRPRCRRH	ARYRccRSQSRSRYYRQRQRSRRRRRRScQTRRRAMRccRPRYRPRcRRH	C5(Carbamidomethyl); C6(Carbamidomethyl); C29(Carbamidomethyl); C38(Carbamidomethyl); C39(Carbamidomethyl); C47(Carbamidomethyl)	2	51	[]	[]	[]	[]	291.592	54.18	PS-008	0	P|000	7029.45	-0.142464	P1	P1	Unmod	P1	P|000 → P1
B	R04	B_R04	TP	1143	709800000	29.4028	-0.571492	32.2983	7031.61	2.01625	2.01625	P04553	P1	['P1']	ARYRCCRSQSRSRYYRQRQRSRRRRRRSCQTRRRAMRCCRPRYRPRCRRH	M.ARYR(C)[Carbamidomethylation](C)[Carbamidomethylation]RSQSRSRY(YR)[2.0162]QRQRSRRRRRRS(C)[Carbamidomethylation]QTRRRAMR(C)[Carbamidomethylation](C)[Carbamidomethylation]RPRYRPR(C)[Carbamidomethylation]RRH.		2	51	[]	[]	[]	[]		23.2587	TP-140	0	P|000	7029.45	-0.142464	P1	P1	Unmod	P1	P|000 → P1
A	R01	A_R01	TP	1164	5938000000	32.4673	0.731954	33.4695	7031.61	2.01756	2.01756	P04553	P1	['P1']	ARYRCCRSQSRSRYYRQRQRSRRRRRRSCQTRRRAMRCCRPRYRPRCRRH	M.ARYR(C)[Carbamidomethylation](C)[Carbamidomethylation]RSQSRSRYYRQRQRSRRRRRR(S(C)[Carbamidomethylation])[2.0225]QTRRRAMR(C)[Carbamidomethylation](C)[Carbamidomethylation]RPRYRPR(C)[Carbamidomethylation]RRH.		2	51	[]	[]	[]	[]		29.434	TP-027	0	P|000	7029.45	-0.142464	P1	P1	Unmod	P1	P|000 → P1
B	R04	B_R04	TP	809	709800000	29.4028	-0.571492	22.561	7031.62	2.02043	2.02043	P04553	P1	['P1']	ARYRCCRSQSRSRYYRQRQRSRRRRRRSCQTRRRAMRCCRPRYRPRCRRH	M.ARYR(C)[Carbamidomethylation](C)[Carbamidomethylation]RSQSRSRY(YR)[2.0204]QRQRSRRRRRRS(C)[Carbamidomethylation]QTRRRAMR(C)[Carbamidomethylation](C)[Carbamidomethylation]RPRYRPR(C)[Carbamidomethylation]RRH.		2	51	[]	[]	[]	[]		21.4936	TP-140	0	P|000	7029.45	-0.142464	P1	P1	Unmod	P1	P|000 → P1
A	R02	A_R02	TP	711	4005000000	31.8992	0.655946	20.482	7031.62	2.02362	2.02362	P04553	P1	['P1']	ARYRCCRSQSRSRYYRQRQRSRRRRRRSCQTRRRAMRCCRPRYRPRCRRH	M.ARYR(C)[Carbamidomethylation](C)[Carbamidomethylation]RSQSRSRYYRQRQRSRRRRRRS(C)[Carbamidomethylation]Q(T)[2.0136]RRRAMR(C)[Carbamidomethylation](C)[Carbamidomethylation]RPRYRPR(C)[Carbamidomethylation]RRH.		2	51	[]	[]	[]	[]		19.5852	TP-027	0	P|000	7029.45	-0.142464	P1	P1	Unmod	P1	P|000 → P1
A	R01	A_R01	TP	866	5938000000	32.4673	0.731954	24.7968	7031.62	2.02418	2.02418	P04553	P1	['P1']	ARYRCCRSQSRSRYYRQRQRSRRRRRRSCQTRRRAMRCCRPRYRPRCRRH	M.ARYR(C)[Carbamidomethylation](C)[Carbamidomethylation]RSQSRSRY(YR)[2.0142]QRQRSRRRRRRS(C)[Carbamidomethylation]QTRRRAMR(C)[Carbamidomethylation](C)[Carbamidomethylation]RPRYRPR(C)[Carbamidomethylation]RRH.		2	51	[]	[]	[]	[]		23.2718	TP-027	0	P|000	7029.45	-0.142464	P1	P1	Unmod	P1	P|000 → P1
A	R01	A_R01	TP	1012	5938000000	32.4673	0.731954	29.0513	7031.62	2.02531	2.02531	P04553	P1	['P1']	ARYRCCRSQSRSRYYRQRQRSRRRRRRSCQTRRRAMRCCRPRYRPRCRRH	M.ARYR(C)[Carbamidomethylation](C)[Carbamidomethylation]RSQSRS(R)[2.0203]YYRQRQRSRRRRRRS(C)[Carbamidomethylation]QTRRRAMR(C)[Carbamidomethylation](C)[Carbamidomethylation]RPRYRPR(C)[Carbamidomethylation]RRH.		2	51	[]	[]	[]	[]		25.9284	TP-027	0	P|000	7029.45	-0.142464	P1	P1	Unmod	P1	P|000 → P1
A	R02	A_R02	TP	1195	4005000000	31.8992	0.655946	34.5737	7031.62	2.02746	2.02746	P04553	P1	['P1']	ARYRCCRSQSRSRYYRQRQRSRRRRRRSCQTRRRAMRCCRPRYRPRCRRH	M.ARYR(C)[Carbamidomethylation](C)[Carbamidomethylation]RSQSRSRYYRQR(QR)[2.0074]SRRRRRRS(C)[Carbamidomethylation]QTRRRAMR(C)[Carbamidomethylation](C)[Carbamidomethylation]RPRYRPR(C)[Carbamidomethylation]RRH.		2	51	[]	[]	[]	[]		25.9339	TP-027	0	P|000	7029.45	-0.142464	P1	P1	Unmod	P1	P|000 → P1
A	R02	A_R02	TP	759	4005000000	31.8992	0.655946	21.888	7032.58	2.98696	2.98696	P04553	P1	['P1']	ARYRCCRSQSRSRYYRQRQRSRRRRRRSCQTRRRAMRCCRPRYRPRCRRH	M.ARYR(C)[Carbamidomethylation](C)[Carbamidomethylation]RSQSR(S)[3.1969]RYYRQRQRSRRRRRRS(C)[Carbamidomethylation]QTRRRAMR(C)[Carbamidomethylation](C)[Carbamidomethylation]RPRYRPR(C)[Carbamidomethylation]RRH.		2	51	[]	[]	[]	[]		27.2823	TP-027	0	P|000	7029.45	-0.142464	P1	P1	Unmod	P1	P|000 → P1
B	R03	B_R03	PS	185	2119.92	11.0498	-2.03323	5.5335	7032.6	3.00592	3.00592	Sperm protamine P1	P1	['P1']	ARYRCCRSQSRSRYYRQRQRSRRRRRRSCQTRRRAMRCCRPRYRPRCRRH	ARYRccRSQSRSRYYRQRQRSRRRRRRScQTRRRAMRccRPRYRPRcRRH	C5(Carbamidomethyl); C6(Carbamidomethyl); C29(Carbamidomethyl); C38(Carbamidomethyl); C39(Carbamidomethyl); C47(Carbamidomethyl)	2	51	[]	[]	[]	[]	344.336	47.55	PS-008	0	P|000	7029.45	-0.142464	P1	P1	Unmod	P1	P|000 → P1
B	R03	B_R03	PS	323	179177	17.451	0.448732	9.5879	7032.6	3.00702	3.00702	Sperm protamine P1	P1	['P1']	ARYRCCRSQSRSRYYRQRQRSRRRRRRSCQTRRRAMRCCRPRYRPRCRRH	ARYRccRSQSRSRYYRQRQRSRRRRRRScQTRRRAMRccRPRYRPRcRRH	C5(Carbamidomethyl); C6(Carbamidomethyl); C29(Carbamidomethyl); C38(Carbamidomethyl); C39(Carbamidomethyl); C47(Carbamidomethyl)	2	51	[]	[]	[]	[]	494.759	120.17	PS-008	0	P|000	7029.45	-0.142464	P1	P1	Unmod	P1	P|000 → P1
B	R03	B_R03	TP	793	5713000000	32.4116	0.938315	22.8462	7032.6	3.0082	3.0082	P04553	P1	['P1']	ARYRCCRSQSRSRYYRQRQRSRRRRRRSCQTRRRAMRCCRPRYRPRCRRH	M.ARYR(C)[Carbamidomethylation](C)[Carbamidomethylation]RSQS(R)[3.0182]SRYYRQRQRSRRRRRRS(C)[Carbamidomethylation]QTRRRAMR(C)[Carbamidomethylation](C)[Carbamidomethylation]RPRYRPR(C)[Carbamidomethylation]RRH.		2	51	[]	[]	[]	[]		23.5741	TP-071	0	P|000	7029.45	-0.142464	P1	P1	Unmod	P1	P|000 → P1
A	R02	A_R02	PS	319	148439	17.1795	0.298038	9.5305	7032.6	3.00852	3.00852	Sperm protamine P1	P1	['P1']	ARYRCCRSQSRSRYYRQRQRSRRRRRRSCQTRRRAMRCCRPRYRPRCRRH	ARYRccRSQSRSRYYRQRQRSRRRRRRScQTRRRAMRccRPRYRPRcRRH	C5(Carbamidomethyl); C6(Carbamidomethyl); C29(Carbamidomethyl); C38(Carbamidomethyl); C39(Carbamidomethyl); C47(Carbamidomethyl)	2	51	[]	[]	[]	[]	497.413	111.95	PS-008	0	P|000	7029.45	-0.142464	P1	P1	Unmod	P1	P|000 → P1
B	R03	B_R03	PS	197	2559.92	11.3219	-1.92773	5.8963	7032.6	3.00892	3.00892	Sperm protamine P1	P1	['P1']	ARYRCCRSQSRSRYYRQRQRSRRRRRRSCQTRRRAMRCCRPRYRPRCRRH	ARYRccRSQSRSRYYRQRQRSRRRRRRScQTRRRAMRccRPRYRPRcRRH	C5(Carbamidomethyl); C6(Carbamidomethyl); C29(Carbamidomethyl); C38(Carbamidomethyl); C39(Carbamidomethyl); C47(Carbamidomethyl)	2	51	[]	[]	[]	[]	381.189	63.38	PS-008	0	P|000	7029.45	-0.142464	P1	P1	Unmod	P1	P|000 → P1
B	R03	B_R03	PS	95	4326.47	12.079	-1.63418	2.8184	7032.61	3.01332	3.01332	Sperm protamine P1	P1	['P1']	ARYRCCRSQSRSRYYRQRQRSRRRRRRSCQTRRRAMRCCRPRYRPRCRRH	ARYRccRSQSRSRYYRQRQRSRRRRRRScQTRRRAMRccRPRYRPRcRRH	C5(Carbamidomethyl); C6(Carbamidomethyl); C29(Carbamidomethyl); C38(Carbamidomethyl); C39(Carbamidomethyl); C47(Carbamidomethyl)	2	51	[]	[]	[]	[]	306.479	44.15	PS-008	0	P|000	7029.45	-0.142464	P1	P1	Unmod	P1	P|000 → P1
A	R01	A_R01	PS	456	37340.4	15.1885	-0.888546	13.2212	7032.61	3.01352	3.01352	Sperm protamine P1	P1	['P1']	ARYRCCRSQSRSRYYRQRQRSRRRRRRSCQTRRRAMRCCRPRYRPRCRRH	ARYRccRSQSRSRYYRQRQRSRRRRRRScQTRRRAMRccRPRYRPRcRRH	C5(Carbamidomethyl); C6(Carbamidomethyl); C29(Carbamidomethyl); C38(Carbamidomethyl); C39(Carbamidomethyl); C47(Carbamidomethyl)	2	51	[]	[]	[]	[]	363.315	102.7	PS-008	0	P|000	7029.45	-0.142464	P1	P1	Unmod	P1	P|000 → P1
A	R01	A_R01	PS	866	24261.4	14.5664	-1.18025	24.7969	7032.62	3.02082	3.02082	Sperm protamine P1	P1	['P1']	ARYRCCRSQSRSRYYRQRQRSRRRRRRSCQTRRRAMRCCRPRYRPRCRRH	ARYRccRSQSRSRYYRQRQRSRRRRRRScQTRRRAMRccRPRYRPRcRRH	C5(Carbamidomethyl); C6(Carbamidomethyl); C29(Carbamidomethyl); C38(Carbamidomethyl); C39(Carbamidomethyl); C47(Carbamidomethyl)	2	51	[]	[]	[]	[]	350.994	96.61	PS-008	0	P|000	7029.45	-0.142464	P1	P1	Unmod	P1	P|000 → P1
B	R03	B_R03	PS	43	2127.93	11.0552	-2.03112	1.2541	7033.59	3.99112	3.99112	Sperm protamine P1	P1	['P1']	ARYRCCRSQSRSRYYRQRQRSRRRRRRSCQTRRRAMRCCRPRYRPRCRRH	ARYRccRSQSRSRYYRQRQRSRRRRRRScQTRRRAMRccRPRYRPRcRRH	C5(Carbamidomethyl); C6(Carbamidomethyl); C29(Carbamidomethyl); C38(Carbamidomethyl); C39(Carbamidomethyl); C47(Carbamidomethyl)	2	51	[]	[]	[]	[]	294.056	51.23	PS-008	0	P|000	7029.45	-0.142464	P1	P1	Unmod	P1	P|000 → P1
B	R03	B_R03	PS	135	3508.36	11.7766	-1.75143	4.0253	7033.59	3.99222	3.99222	Sperm protamine P1	P1	['P1']	ARYRCCRSQSRSRYYRQRQRSRRRRRRSCQTRRRAMRCCRPRYRPRCRRH	ARYRccRSQSRSRYYRQRQRSRRRRRRScQTRRRAMRccRPRYRPRcRRH	C5(Carbamidomethyl); C6(Carbamidomethyl); C29(Carbamidomethyl); C38(Carbamidomethyl); C39(Carbamidomethyl); C47(Carbamidomethyl)	2	51	[]	[]	[]	[]	275.493	40.31	PS-008	0	P|000	7029.45	-0.142464	P1	P1	Unmod	P1	P|000 → P1
A	R02	A_R02	PS	211	1953.43	10.9318	-2.28642	6.3454	7033.59	3.99852	3.99852	Sperm protamine P1	P1	['P1']	ARYRCCRSQSRSRYYRQRQRSRRRRRRSCQTRRRAMRCCRPRYRPRCRRH	ARYRccRSQSRSRYYRQRQRSRRRRRRScQTRRRAMRccRPRYRPRcRRH	C5(Carbamidomethyl); C6(Carbamidomethyl); C29(Carbamidomethyl); C38(Carbamidomethyl); C39(Carbamidomethyl); C47(Carbamidomethyl)	2	51	[]	[]	[]	[]	298.844	41.48	PS-008	0	P|000	7029.45	-0.142464	P1	P1	Unmod	P1	P|000 → P1
A	R02	A_R02	PS	110	1414.67	10.4662	-2.479	3.2923	7033.59	3.99912	3.99912	Sperm protamine P1	P1	['P1']	ARYRCCRSQSRSRYYRQRQRSRRRRRRSCQTRRRAMRCCRPRYRPRCRRH	ARYRccRSQSRSRYYRQRQRSRRRRRRScQTRRRAMRccRPRYRPRcRRH	C5(Carbamidomethyl); C6(Carbamidomethyl); C29(Carbamidomethyl); C38(Carbamidomethyl); C39(Carbamidomethyl); C47(Carbamidomethyl)	2	51	[]	[]	[]	[]	365.382	56.36	PS-008	0	P|000	7029.45	-0.142464	P1	P1	Unmod	P1	P|000 → P1
B	R04	B_R04	PS	1327	8222.46	13.0054	-1.9766	37.6791	7033.6	4.00122	4.00122	Sperm protamine P1	P1	['P1']	ARYRCCRSQSRSRYYRQRQRSRRRRRRSCQTRRRAMRCCRPRYRPRCRRH	ARYRccRsQSRSRYYRQRQRSRRRRRRScQTRRRAMRccRPRYRPRcRRH	C5(Carbamidomethyl); C6(Carbamidomethyl); S8(O-phospho-L-serine); C29(Carbamidomethyl); C38(Carbamidomethyl); C39(Carbamidomethyl); C47(Carbamidomethyl)	2	51	['S']	[8]	[9]	[]	1.17467	3.88	PS-037	1	P|000	7029.45	-0.142464	P1	P1	Unmod	P1	P|000 → P1
B	R03	B_R03	PS	345	186005	17.505	0.469653	10.2034	7033.6	4.00342	4.00342	Sperm protamine P1	P1	['P1']	ARYRCCRSQSRSRYYRQRQRSRRRRRRSCQTRRRAMRCCRPRYRPRCRRH	ARYRccRSQSRSRYYRQRQRSRRRRRRScQTRRRAMRccRPRYRPRcRRH	C5(Carbamidomethyl); C6(Carbamidomethyl); C29(Carbamidomethyl); C38(Carbamidomethyl); C39(Carbamidomethyl); C47(Carbamidomethyl)	2	51	[]	[]	[]	[]	408.275	104.64	PS-008	0	P|000	7029.45	-0.142464	P1	P1	Unmod	P1	P|000 → P1
A	R01	A_R01	PS	662	42414.2	15.3723	-0.802355	18.8235	7033.6	4.00462	4.00462	Sperm protamine P1	P1	['P1']	ARYRCCRSQSRSRYYRQRQRSRRRRRRSCQTRRRAMRCCRPRYRPRCRRH	ARYRccRSQSRSRYYRQRQRSRRRRRRScQTRRRAMRccRPRYRPRcRRH	C5(Carbamidomethyl); C6(Carbamidomethyl); C29(Carbamidomethyl); C38(Carbamidomethyl); C39(Carbamidomethyl); C47(Carbamidomethyl)	2	51	[]	[]	[]	[]	359.109	89.45	PS-008	0	P|000	7029.45	-0.142464	P1	P1	Unmod	P1	P|000 → P1
B	R03	B_R03	PS	333	137097	17.0648	0.298997	9.8732	7033.6	4.00502	4.00502	Sperm protamine P1	P1	['P1']	ARYRCCRSQSRSRYYRQRQRSRRRRRRSCQTRRRAMRCCRPRYRPRCRRH	ARYRccRSQSRSRYYRQRQRSRRRRRRScQTRRRAMRccRPRYRPRcRRH	C5(Carbamidomethyl); C6(Carbamidomethyl); C29(Carbamidomethyl); C38(Carbamidomethyl); C39(Carbamidomethyl); C47(Carbamidomethyl)	2	51	[]	[]	[]	[]	423.294	110.24	PS-008	0	P|000	7029.45	-0.142464	P1	P1	Unmod	P1	P|000 → P1
B	R03	B_R03	PS	239	2802.07	11.4523	-1.87718	7.1606	7033.6	4.00912	4.00912	Sperm protamine P1	P1	['P1']	ARYRCCRSQSRSRYYRQRQRSRRRRRRSCQTRRRAMRCCRPRYRPRCRRH	ARYRccRSQSRSRYYRQRQRSRRRRRRScQTRRRAMRccRPRYRPRcRRH	C5(Carbamidomethyl); C6(Carbamidomethyl); C29(Carbamidomethyl); C38(Carbamidomethyl); C39(Carbamidomethyl); C47(Carbamidomethyl)	2	51	[]	[]	[]	[]	332.876	51.01	PS-008	0	P|000	7029.45	-0.142464	P1	P1	Unmod	P1	P|000 → P1
B	R04	B_R04	PS	1143	12999.2	13.6661	-1.71644	32.2983	7033.61	4.01092	4.01092	Sperm protamine P1	P1	['P1']	ARYRCCRSQSRSRYYRQRQRSRRRRRRSCQTRRRAMRCCRPRYRPRCRRH	ARYRccRSQSRSRYYRQRQRSRRRRRRScQTRRRAMRccRPRYRPRcRRH	C5(Carbamidomethyl); C6(Carbamidomethyl); C29(Carbamidomethyl); C38(Carbamidomethyl); C39(Carbamidomethyl); C47(Carbamidomethyl)	2	51	[]	[]	[]	[]	270.239	79.57	PS-008	0	P|000	7029.45	-0.142464	P1	P1	Unmod	P1	P|000 → P1
A	R02	A_R02	PS	783	230265	17.8129	0.560064	22.5882	7033.61	4.01312	4.01312	Sperm protamine P1	P1	['P1']	ARYRCCRSQSRSRYYRQRQRSRRRRRRSCQTRRRAMRCCRPRYRPRCRRH	ARYRccRSQSRSRYYRQRQRSRRRRRRScQTRRRAMRccRPRYRPRcRRH	C5(Carbamidomethyl); C6(Carbamidomethyl); C29(Carbamidomethyl); C38(Carbamidomethyl); C39(Carbamidomethyl); C47(Carbamidomethyl)	2	51	[]	[]	[]	[]	213.398	67.33	PS-008	0	P|000	7029.45	-0.142464	P1	P1	Unmod	P1	P|000 → P1
B	R03	B_R03	PS	267	56465.5	15.7851	-0.197207	7.995	7034.59	4.99232	4.99232	Sperm protamine P1	P1	['P1']	ARYRCCRSQSRSRYYRQRQRSRRRRRRSCQTRRRAMRCCRPRYRPRCRRH	ARYRccRSQSRSRYYRQRQRSRRRRRRScQTRRRAMRccRPRYRPRcRRH	C5(Carbamidomethyl); C6(Carbamidomethyl); C29(Carbamidomethyl); C38(Carbamidomethyl); C39(Carbamidomethyl); C47(Carbamidomethyl)	2	51	[]	[]	[]	[]	356.921	83.15	PS-008	0	P|000	7029.45	-0.142464	P1	P1	Unmod	P1	P|000 → P1
B	R03	B_R03	PS	355	109949	16.7465	0.175558	10.484	7034.59	4.99792	4.99792	Sperm protamine P1	P1	['P1']	ARYRCCRSQSRSRYYRQRQRSRRRRRRSCQTRRRAMRCCRPRYRPRCRRH	ARYRccRSQSRSRYYRQRQRSRRRRRRScQTRRRAMRccRPRYRPRcRRH	C5(Carbamidomethyl); C6(Carbamidomethyl); C29(Carbamidomethyl); C38(Carbamidomethyl); C39(Carbamidomethyl); C47(Carbamidomethyl)	2	51	[]	[]	[]	[]	377.895	97.64	PS-008	0	P|000	7029.45	-0.142464	P1	P1	Unmod	P1	P|000 → P1
B	R03	B_R03	PS	417	73355.6	16.1626	-0.0508233	12.251	7034.6	4.99962	4.99962	Sperm protamine P1	P1	['P1']	ARYRCCRSQSRSRYYRQRQRSRRRRRRSCQTRRRAMRCCRPRYRPRCRRH	ARYRccRSQSRSRYYRQRQRSRRRRRRScQTRRRAMRccRPRYRPRcRRH	C5(Carbamidomethyl); C6(Carbamidomethyl); C29(Carbamidomethyl); C38(Carbamidomethyl); C39(Carbamidomethyl); C47(Carbamidomethyl)	2	51	[]	[]	[]	[]	469.177	112.72	PS-008	0	P|000	7029.45	-0.142464	P1	P1	Unmod	P1	P|000 → P1
A	R02	A_R02	PS	213	1435.97	10.4878	-2.47008	6.4061	7035.6	6.00292	6.00292	Sperm protamine P1	P1	['P1']	ARYRCCRSQSRSRYYRQRQRSRRRRRRSCQTRRRAMRCCRPRYRPRCRRH	ARYRccRSQSRSRYYRQRQRSRRRRRRScQTRRRAMRccRPRYRPRcRRH	C5(Carbamidomethyl); C6(Carbamidomethyl); C29(Carbamidomethyl); C38(Carbamidomethyl); C39(Carbamidomethyl); C47(Carbamidomethyl)	2	51	[]	[]	[]	[]	400.289	59.06	PS-008	0	P|000	7029.45	-0.142464	P1	P1	Unmod	P1	P|000 → P1
A	R02	A_R02	PS	695	33968.4	15.0519	-0.582075	20.0136	7040.03			Protamine-2	HP3	['pre-P2', 'HPI2', 'HPS1', 'HPS2', 'HP4', 'HP2', 'HP3']	GQSHYRRRHCSRRRLHRIHRRQHRSCRRRKRRSCRHRRRHRRGCRTRKRTCRRH	GQSHYRRRHcSRRRLHRIHRRQHRScRRRKRRScRHRRRHRRGcRTRKRTcRRH	C10(Carbamidomethyl); C26(Carbamidomethyl); C34(Carbamidomethyl); C44(Carbamidomethyl); C51(Carbamidomethyl)	49	102	[]	[]	[]	[]	1	24.79	PS-017	0	Unclustered	10326.5		Unknown	Unknown	Unknown	Unidentified	Unclustered → Unknown
B	R03	B_R03	PS	145	1629.52	10.6702	-2.1804	4.327	7082.55			Sperm protamine P1	P1	['P1']	ARYRCCRSQSRSRYYRQRQRSRRRRRRSCQTRRRAMRCCRPRYRPRCRRH	ARYRccRSQSRSRYYRQRQRSRRRRRRScQTRRRAMRccRPRYRPRcRRH	C5(Carbamidomethyl); C6(Carbamidomethyl); C29(Carbamidomethyl); C38(Carbamidomethyl); C39(Carbamidomethyl); C47(Carbamidomethyl)	2	51	[]	[]	[]	[]	78.0301	26.99	PS-008	0	Unclustered	10326.5		Unknown	Unknown	Unknown	Unidentified	Unclustered → Unknown
A	R02	A_R02	PS	167	1258.51	10.2975	-2.5488	5.0156	7082.55			Sperm protamine P1	P1	['P1']	ARYRCCRSQSRSRYYRQRQRSRRRRRRSCQTRRRAMRCCRPRYRPRCRRH	ARYRccRSQSRSRYYRQRQRSRRRRRRScQTRRRAMRccRPRYRPRcRRH	C5(Carbamidomethyl); C6(Carbamidomethyl); C29(Carbamidomethyl); C38(Carbamidomethyl); C39(Carbamidomethyl); C47(Carbamidomethyl)	2	51	[]	[]	[]	[]	151.877	33.32	PS-008	0	Unclustered	10326.5		Unknown	Unknown	Unknown	Unidentified	Unclustered → Unknown
A	R02	A_R02	PS	801	7498.94	12.8725	-1.48363	23.1179	7082.56			Sperm protamine P1	P1	['P1']	ARYRCCRSQSRSRYYRQRQRSRRRRRRSCQTRRRAMRCCRPRYRPRCRRH	ARYRccRSQSRSRYYRQRQRSRRRRRRScQTRRRAMRccRPRYRPRcRRH	C5(Carbamidomethyl); C6(Carbamidomethyl); C29(Carbamidomethyl); C38(Carbamidomethyl); C39(Carbamidomethyl); C47(Carbamidomethyl)	2	51	[]	[]	[]	[]	144.127	41.72	PS-008	0	Unclustered	10326.5		Unknown	Unknown	Unknown	Unidentified	Unclustered → Unknown
B	R03	B_R03	PS	35	1380.22	10.4307	-2.27328	1.0171	7083.56	53.9623	53.9623	Sperm protamine P1	P1	['P1']	ARYRCCRSQSRSRYYRQRQRSRRRRRRSCQTRRRAMRCCRPRYRPRCRRH	ARYRccRSQSRSRYYRQRQRSRRRRRRScQTRRRAMRccRPRYRPRcRRH	C5(Carbamidomethyl); C6(Carbamidomethyl); C29(Carbamidomethyl); C38(Carbamidomethyl); C39(Carbamidomethyl); C47(Carbamidomethyl)	2	51	[]	[]	[]	[]	114.378	19.03	PS-008	0	P|001	7090.92	61.3199	P1	P1 +1(61)	+1(61)	P1	P|001 → P1 +1(61)
A	R01	A_R01	PS	548	52003.3	15.6663	-0.664467	15.5558	7085.58	55.9834	55.9834	Sperm protamine P1	P1	['P1']	ARYRCCRSQSRSRYYRQRQRSRRRRRRSCQTRRRAMRCCRPRYRPRCRRH	ARYRccRSQSRSRYYRQRQRSRRRRRRScQTRRRAMRccRPRYRPRcRRH	C5(Carbamidomethyl); C6(Carbamidomethyl); C29(Carbamidomethyl); C38(Carbamidomethyl); C39(Carbamidomethyl); C47(Carbamidomethyl)	2	51	[]	[]	[]	[]	146.03	54.02	PS-008	0	P|001	7090.92	61.3199	P1	P1 +1(61)	+1(61)	P1	P|001 → P1 +1(61)
A	R02	A_R02	PS	251	2150.61	11.0705	-2.22903	7.5591	7085.61	56.0109	56.0109	Sperm protamine P1	P1	['P1']	ARYRCCRSQSRSRYYRQRQRSRRRRRRSCQTRRRAMRCCRPRYRPRCRRH	ARYRccRSQSRSRYYRQRQRSRRRRRRScQTRRRAMRccRPRYRPRcRRH	C5(Carbamidomethyl); C6(Carbamidomethyl); C29(Carbamidomethyl); C38(Carbamidomethyl); C39(Carbamidomethyl); C47(Carbamidomethyl)	2	51	[]	[]	[]	[]	169.685	28.52	PS-008	0	P|001	7090.92	61.3199	P1	P1 +1(61)	+1(61)	P1	P|001 → P1 +1(61)
B	R03	B_R03	PS	62	1760.54	10.7818	-2.13714	1.8242	7086.62	57.0243	57.0243	Sperm protamine P1	P1	['P1']	ARYRCCRSQSRSRYYRQRQRSRRRRRRSCQTRRRAMRCCRPRYRPRCRRH	ARYRccRSQSRSRYYRQRQRSRRRRRRScQTRRRAMRccRPRYRPRcRRH	C5(Carbamidomethyl); C6(Carbamidomethyl); C29(Carbamidomethyl); C38(Carbamidomethyl); C39(Carbamidomethyl); C47(Carbamidomethyl)	2	51	[]	[]	[]	[]	141.386	16.35	PS-008	0	P|001	7090.92	61.3199	P1	P1 +1(61)	+1(61)	P1	P|001 → P1 +1(61)
B	R04	B_R04	PS	99	5773.5	12.4952	-2.17744	2.9122	7086.62	57.0272	57.0272	Sperm protamine P1	P1	['P1']	ARYRCCRSQSRSRYYRQRQRSRRRRRRSCQTRRRAMRCCRPRYRPRCRRH	ARYRccRSQSRSRYYRQRQRSRRRRRRScQTRRRAMRccRPRYRPRcRRH	C5(Carbamidomethyl); C6(Carbamidomethyl); C29(Carbamidomethyl); C38(Carbamidomethyl); C39(Carbamidomethyl); C47(Carbamidomethyl)	2	51	[]	[]	[]	[]	64.6877	36.99	PS-008	0	P|001	7090.92	61.3199	P1	P1 +1(61)	+1(61)	P1	P|001 → P1 +1(61)
B	R03	B_R03	PS	487	350436	18.4188	0.823968	14.2369	7086.62	57.0273	57.0273	Sperm protamine P1	P1	['P1']	ARYRCCRSQSRSRYYRQRQRSRRRRRRSCQTRRRAMRCCRPRYRPRCRRH	ARYRccRSQSRSRYYRQRQRSRRRRRRScQTRRRAMRccRPRYRPRcRRH	C5(Carbamidomethyl); C6(Carbamidomethyl); C29(Carbamidomethyl); C38(Carbamidomethyl); C39(Carbamidomethyl); C47(Carbamidomethyl)	2	51	[]	[]	[]	[]	226.424	65.89	PS-008	0	P|001	7090.92	61.3199	P1	P1 +1(61)	+1(61)	P1	P|001 → P1 +1(61)
B	R04	B_R04	PS	61	5968.68	12.5432	-2.15856	1.782	7086.62	57.028	57.028	Sperm protamine P1	P1	['P1']	ARYRCCRSQSRSRYYRQRQRSRRRRRRSCQTRRRAMRCCRPRYRPRCRRH	ARYRccRSQSRSRYYRQRQRSRRRRRRScQTRRRAMRccRPRYRPRcRRH	C5(Carbamidomethyl); C6(Carbamidomethyl); C29(Carbamidomethyl); C38(Carbamidomethyl); C39(Carbamidomethyl); C47(Carbamidomethyl)	2	51	[]	[]	[]	[]	64.2356	39.06	PS-008	0	P|001	7090.92	61.3199	P1	P1 +1(61)	+1(61)	P1	P|001 → P1 +1(61)
A	R01	A_R01	PS	570	121109	16.8859	-0.0925609	16.1692	7086.62	57.0283	57.0283	Sperm protamine P1	P1	['P1']	ARYRCCRSQSRSRYYRQRQRSRRRRRRSCQTRRRAMRCCRPRYRPRCRRH	ARYRccRSQSRSRYYRQRQRSRRRRRRScQTRRRAMRccRPRYRPRcRRH	C5(Carbamidomethyl); C6(Carbamidomethyl); C29(Carbamidomethyl); C38(Carbamidomethyl); C39(Carbamidomethyl); C47(Carbamidomethyl)	2	51	[]	[]	[]	[]	120.794	56.01	PS-008	0	P|001	7090.92	61.3199	P1	P1 +1(61)	+1(61)	P1	P|001 → P1 +1(61)
B	R03	B_R03	PS	529	178936	17.4491	0.447979	15.2371	7086.62	57.0284	57.0284	Sperm protamine P1	P1	['P1']	ARYRCCRSQSRSRYYRQRQRSRRRRRRSCQTRRRAMRCCRPRYRPRCRRH	ARYRccRSQSRSRYYRQRQRSRRRRRRScQTRRRAMRccRPRYRPRcRRH	C5(Carbamidomethyl); C6(Carbamidomethyl); C29(Carbamidomethyl); C38(Carbamidomethyl); C39(Carbamidomethyl); C47(Carbamidomethyl)	2	51	[]	[]	[]	[]	125.093	58.85	PS-008	0	P|001	7090.92	61.3199	P1	P1 +1(61)	+1(61)	P1	P|001 → P1 +1(61)
B	R04	B_R04	PS	59	7308.51	12.8354	-2.04353	1.7226	7086.63	57.0313	57.0313	Sperm protamine P1	P1	['P1']	ARYRCCRSQSRSRYYRQRQRSRRRRRRSCQTRRRAMRCCRPRYRPRCRRH	ARYRccRSQSRSRYYRQRQRSRRRRRRScQTRRRAMRccRPRYRPRcRRH	C5(Carbamidomethyl); C6(Carbamidomethyl); C29(Carbamidomethyl); C38(Carbamidomethyl); C39(Carbamidomethyl); C47(Carbamidomethyl)	2	51	[]	[]	[]	[]	102.241	42.29	PS-008	0	P|001	7090.92	61.3199	P1	P1 +1(61)	+1(61)	P1	P|001 → P1 +1(61)
B	R04	B_R04	PS	219	7247.64	12.8233	-2.04828	6.4988	7087.63	58.0348	58.0348	Sperm protamine P1	P1	['P1']	ARYRCCRSQSRSRYYRQRQRSRRRRRRSCQTRRRAMRCCRPRYRPRCRRH	ARYRccRSQSRSRYYRQRQRSRRRRRRScQTRRRAMRccRPRYRPRcRRH	C5(Carbamidomethyl); C6(Carbamidomethyl); C29(Carbamidomethyl); C38(Carbamidomethyl); C39(Carbamidomethyl); C47(Carbamidomethyl)	2	51	[]	[]	[]	[]	102.4	34.78	PS-008	0	P|001	7090.92	61.3199	P1	P1 +1(61)	+1(61)	P1	P|001 → P1 +1(61)
A	R02	A_R02	PS	933	28053.5	14.7759	-0.696251	26.9604	7088.62	59.0201	59.0201	Sperm protamine P1	P1	['P1']	ARYRCCRSQSRSRYYRQRQRSRRRRRRSCQTRRRAMRCCRPRYRPRCRRH	ARYRccRSQSRSRYYRQRQRSRRRRRRScQTRRRAMRccRPRYRPRcRRH	C5(Carbamidomethyl); C6(Carbamidomethyl); C29(Carbamidomethyl); C38(Carbamidomethyl); C39(Carbamidomethyl); C47(Carbamidomethyl)	2	51	[]	[]	[]	[]	146.044	35.82	PS-008	0	P|001	7090.92	61.3199	P1	P1 +1(61)	+1(61)	P1	P|001 → P1 +1(61)
A	R02	A_R02	PS	757	29892.6	14.8675	-0.658357	21.8296	7088.62	59.0231	59.0231	Sperm protamine P1	P1	['P1']	ARYRCCRSQSRSRYYRQRQRSRRRRRRSCQTRRRAMRCCRPRYRPRCRRH	ARYRccRSQSRSRYYRQRQRSRRRRRRScQTRRRAMRccRPRYRPRcRRH	C5(Carbamidomethyl); C6(Carbamidomethyl); C29(Carbamidomethyl); C38(Carbamidomethyl); C39(Carbamidomethyl); C47(Carbamidomethyl)	2	51	[]	[]	[]	[]	110.02	45.24	PS-008	0	P|001	7090.92	61.3199	P1	P1 +1(61)	+1(61)	P1	P|001 → P1 +1(61)
A	R01	A_R01	PS	650	132212	17.0125	-0.0332194	18.4715	7088.62	59.0244	59.0244	Sperm protamine P1	P1	['P1']	ARYRCCRSQSRSRYYRQRQRSRRRRRRSCQTRRRAMRCCRPRYRPRCRRH	ARYRccRSQSRSRYYRQRQRSRRRRRRScQTRRRAMRccRPRYRPRcRRH	C5(Carbamidomethyl); C6(Carbamidomethyl); C29(Carbamidomethyl); C38(Carbamidomethyl); C39(Carbamidomethyl); C47(Carbamidomethyl)	2	51	[]	[]	[]	[]	155.461	47.37	PS-008	0	P|001	7090.92	61.3199	P1	P1 +1(61)	+1(61)	P1	P|001 → P1 +1(61)
A	R01	A_R01	TP	636	5951000000	32.4705	0.733082	18.0562	7088.64	59.048	59.048	P04554	Unidentified	['pre-P2', 'P2-2']	VRYRVRSLSERSHEVYRQQLHGQEQGHHGQEEQGLSPEHVEVYERTHGQSHYRRRHCS	M.VRYRVRSLSERSHEVYRQQLHGQEQGHHGQEEQGLSPEHVEVYERTHGQSHYRRRH(C)[Carbamidomethylation](S)[-11.5671].R		2	59	[]	[]	[]	[]		24.2409	TP-030	0	P|001	7090.92	61.3199	P1	P1 +1(61)	+1(61)	P1	P|001 → P1 +1(61)
A	R01	A_R01	PS	784	101963	16.6377	-0.208975	22.4033	7089.57	59.979	59.979	Sperm protamine P1	P1	['P1']	ARYRCCRSQSRSRYYRQRQRSRRRRRRSCQTRRRAMRCCRPRYRPRCRRH	ARYRccRSQSRSRYYRQRQRSRRRRRRScQTRRRAMRccRPRYRPRcRRH	C5(Carbamidomethyl); C6(Carbamidomethyl); C29(Carbamidomethyl); C38(Carbamidomethyl); C39(Carbamidomethyl); C47(Carbamidomethyl)	2	51	[]	[]	[]	[]	99.2308	75.15	PS-008	0	P|001	7090.92	61.3199	P1	P1 +1(61)	+1(61)	P1	P|001 → P1 +1(61)
A	R02	A_R02	PS	251	19619.7	14.26	-0.909652	7.5591	7089.6	60.0023	60.0023	Sperm protamine P1	P1	['P1']	ARYRCCRSQSRSRYYRQRQRSRRRRRRSCQTRRRAMRCCRPRYRPRCRRH	ARYRccRSQSRSRYYRQRQRSRRRRRRScQTRRRAMRccRPRYRPRcRRH	C5(Carbamidomethyl); C6(Carbamidomethyl); C29(Carbamidomethyl); C38(Carbamidomethyl); C39(Carbamidomethyl); C47(Carbamidomethyl)	2	51	[]	[]	[]	[]	137.585	30.33	PS-008	0	P|001	7090.92	61.3199	P1	P1 +1(61)	+1(61)	P1	P|001 → P1 +1(61)
A	R02	A_R02	PS	100	34475.4	15.0733	-0.573233	2.9891	7089.6	60.0039	60.0039	Sperm protamine P1	P1	['P1']	ARYRCCRSQSRSRYYRQRQRSRRRRRRSCQTRRRAMRCCRPRYRPRCRRH	ARYRccRSQSRSRYYRQRQRSRRRRRRScQTRRRAMRccRPRYRPRcRRH	C5(Carbamidomethyl); C6(Carbamidomethyl); C29(Carbamidomethyl); C38(Carbamidomethyl); C39(Carbamidomethyl); C47(Carbamidomethyl)	2	51	[]	[]	[]	[]	122.843	50.14	PS-008	0	P|001	7090.92	61.3199	P1	P1 +1(61)	+1(61)	P1	P|001 → P1 +1(61)
B	R03	B_R03	PS	105	17518.8	14.0966	-0.851878	3.1204	7089.6	60.0058	60.0058	Sperm protamine P1	P1	['P1']	ARYRCCRSQSRSRYYRQRQRSRRRRRRSCQTRRRAMRCCRPRYRPRCRRH	ARYRccRSQSRSRYYRQRQRSRRRRRRScQTRRRAMRccRPRYRPRcRRH	C5(Carbamidomethyl); C6(Carbamidomethyl); C29(Carbamidomethyl); C38(Carbamidomethyl); C39(Carbamidomethyl); C47(Carbamidomethyl)	2	51	[]	[]	[]	[]	134.84	23.94	PS-008	0	P|001	7090.92	61.3199	P1	P1 +1(61)	+1(61)	P1	P|001 → P1 +1(61)
A	R02	A_R02	PS	207	24978.2	14.6084	-0.765544	6.2237	7089.6	60.006	60.006	Sperm protamine P1	P1	['P1']	ARYRCCRSQSRSRYYRQRQRSRRRRRRSCQTRRRAMRCCRPRYRPRCRRH	ARYRccRSQSRSRYYRQRQRSRRRRRRScQTRRRAMRccRPRYRPRcRRH	C5(Carbamidomethyl); C6(Carbamidomethyl); C29(Carbamidomethyl); C38(Carbamidomethyl); C39(Carbamidomethyl); C47(Carbamidomethyl)	2	51	[]	[]	[]	[]	146.269	48.92	PS-008	0	P|001	7090.92	61.3199	P1	P1 +1(61)	+1(61)	P1	P|001 → P1 +1(61)
A	R02	A_R02	PS	499	6.2213e+06	22.5688	2.52739	14.6288	7089.61	60.01	60.01	Sperm protamine P1	P1	['P1']	ARYRCCRSQSRSRYYRQRQRSRRRRRRSCQTRRRAMRCCRPRYRPRCRRH	ARYRccRSQSRSRYYRQRQRSRRRRRRScQTRRRAMRccRPRYRPRcRRH	C5(Carbamidomethyl); C6(Carbamidomethyl); C29(Carbamidomethyl); C38(Carbamidomethyl); C39(Carbamidomethyl); C47(Carbamidomethyl)	2	51	[]	[]	[]	[]	73.1862	92.29	PS-008	0	P|001	7090.92	61.3199	P1	P1 +1(61)	+1(61)	P1	P|001 → P1 +1(61)
B	R04	B_R04	PS	135	39561	15.2718	-1.08428	3.987	7089.61	60.0112	60.0112	Sperm protamine P1	P1	['P1']	ARYRCCRSQSRSRYYRQRQRSRRRRRRSCQTRRRAMRCCRPRYRPRCRRH	ARYRccRSQSRSRYYRQRQRSRRRRRRScQTRRRAMRccRPRYRPRcRRH	C5(Carbamidomethyl); C6(Carbamidomethyl); C29(Carbamidomethyl); C38(Carbamidomethyl); C39(Carbamidomethyl); C47(Carbamidomethyl)	2	51	[]	[]	[]	[]	115.083	52.13	PS-008	0	P|001	7090.92	61.3199	P1	P1 +1(61)	+1(61)	P1	P|001 → P1 +1(61)
B	R04	B_R04	PS	119	57638.6	15.8147	-0.870508	3.5086	7089.61	60.0158	60.0158	Sperm protamine P1	P1	['P1']	ARYRCCRSQSRSRYYRQRQRSRRRRRRSCQTRRRAMRCCRPRYRPRCRRH	ARYRccRSQSRSRYYRQRQRSRRRRRRScQTRRRAMRccRPRYRPRcRRH	C5(Carbamidomethyl); C6(Carbamidomethyl); C29(Carbamidomethyl); C38(Carbamidomethyl); C39(Carbamidomethyl); C47(Carbamidomethyl)	2	51	[]	[]	[]	[]	27.0068	51.39	PS-008	0	P|001	7090.92	61.3199	P1	P1 +1(61)	+1(61)	P1	P|001 → P1 +1(61)
A	R01	A_R01	TP	592	5951000000	32.4705	0.733082	16.803	7089.62	60.0209	60.0209	P04553	P1	['P1']	ARYRCCRSQSRSRYYRQRQRSRRRRRRSCQTRRRAMRCCRPRYRPRCRRH	M.ARYR(C)[Carbamidomethylation](C)[Carbamidomethylation]RSQSRSRYYRQRQRSRRRRRRS(C)[Carbamidomethylation]QTRRRAMR(C)[Carbamidomethylation](C)[Carbamidomethylation]R(PR)[60.0309]YRPR(C)[Carbamidomethylation]RRH.		2	51	[]	[]	[]	[]		18.3637	TP-047	0	P|001	7090.92	61.3199	P1	P1 +1(61)	+1(61)	P1	P|001 → P1 +1(61)
A	R01	A_R01	PS	748	127426	16.9593	-0.0581674	21.3465	7089.62	60.0228	60.0228	Sperm protamine P1	P1	['P1']	ARYRCCRSQSRSRYYRQRQRSRRRRRRSCQTRRRAMRCCRPRYRPRCRRH	ARYRccRSQSRSRYYRQRQRSRRRRRRScQTRRRAMRccRPRYRPRcRRH	C5(Carbamidomethyl); C6(Carbamidomethyl); C29(Carbamidomethyl); C38(Carbamidomethyl); C39(Carbamidomethyl); C47(Carbamidomethyl)	2	51	[]	[]	[]	[]	82.7486	61.12	PS-008	0	P|001	7090.92	61.3199	P1	P1 +1(61)	+1(61)	P1	P|001 → P1 +1(61)
A	R02	A_R02	PS	827	36030.1	15.1369	-0.546909	23.8742	7089.62	60.0234	60.0234	Sperm protamine P1	P1	['P1']	ARYRCCRSQSRSRYYRQRQRSRRRRRRSCQTRRRAMRCCRPRYRPRCRRH	ARYRccRSQSRSRYYRQRQRSRRRRRRScQTRRRAMRccRPRYRPRcRRH	C5(Carbamidomethyl); C6(Carbamidomethyl); C29(Carbamidomethyl); C38(Carbamidomethyl); C39(Carbamidomethyl); C47(Carbamidomethyl)	2	51	[]	[]	[]	[]	82.3884	60.07	PS-008	0	P|001	7090.92	61.3199	P1	P1 +1(61)	+1(61)	P1	P|001 → P1 +1(61)
A	R02	A_R02	PS	521	1.11961e+06	20.0946	1.50389	15.1363	7089.62	60.0237	60.0237	Sperm protamine P1	P1	['P1']	ARYRCCRSQSRSRYYRQRQRSRRRRRRSCQTRRRAMRCCRPRYRPRCRRH	ARYRccRSQSRSRYYRQRQRSRRRRRRScQTRRRAMRccRPRYRPRcRRH	C5(Carbamidomethyl); C6(Carbamidomethyl); C29(Carbamidomethyl); C38(Carbamidomethyl); C39(Carbamidomethyl); C47(Carbamidomethyl)	2	51	[]	[]	[]	[]	27.9335	86.27	PS-008	0	P|001	7090.92	61.3199	P1	P1 +1(61)	+1(61)	P1	P|001 → P1 +1(61)
B	R03	B_R03	PS	62	14094.1	13.7828	-0.973555	1.8242	7089.62	60.0245	60.0245	Sperm protamine P1	P1	['P1']	ARYRCCRSQSRSRYYRQRQRSRRRRRRSCQTRRRAMRCCRPRYRPRCRRH	ARYRccRSQSRSRYYRQRQRSRRRRRRScQTRRRAMRccRPRYRPRcRRH	C5(Carbamidomethyl); C6(Carbamidomethyl); C29(Carbamidomethyl); C38(Carbamidomethyl); C39(Carbamidomethyl); C47(Carbamidomethyl)	2	51	[]	[]	[]	[]	183.312	23.87	PS-008	0	P|001	7090.92	61.3199	P1	P1 +1(61)	+1(61)	P1	P|001 → P1 +1(61)
A	R01	A_R01	PS	512	7.99237e+06	22.9302	2.74169	14.6988	7089.62	60.0247	60.0247	Sperm protamine P1	P1	['P1']	ARYRCCRSQSRSRYYRQRQRSRRRRRRSCQTRRRAMRCCRPRYRPRCRRH	ARYRccRSQSRSRYYRQRQRSRRRRRRScQTRRRAMRccRPRYRPRcRRH	C5(Carbamidomethyl); C6(Carbamidomethyl); C29(Carbamidomethyl); C38(Carbamidomethyl); C39(Carbamidomethyl); C47(Carbamidomethyl)	2	51	[]	[]	[]	[]	30.469	74.05	PS-008	0	P|001	7090.92	61.3199	P1	P1 +1(61)	+1(61)	P1	P|001 → P1 +1(61)
A	R01	A_R01	PS	688	144988	17.1456	0.0291823	19.5899	7089.62	60.025	60.025	Sperm protamine P1	P1	['P1']	ARYRCCRSQSRSRYYRQRQRSRRRRRRSCQTRRRAMRCCRPRYRPRCRRH	ARYRccRSQSRSRYYRQRQRSRRRRRRScQTRRRAMRccRPRYRPRcRRH	C5(Carbamidomethyl); C6(Carbamidomethyl); C29(Carbamidomethyl); C38(Carbamidomethyl); C39(Carbamidomethyl); C47(Carbamidomethyl)	2	51	[]	[]	[]	[]	49.0892	80.67	PS-008	0	P|001	7090.92	61.3199	P1	P1 +1(61)	+1(61)	P1	P|001 → P1 +1(61)
B	R03	B_R03	PS	481	1.88841e+06	20.8487	1.76614	14.0768	7089.62	60.0264	60.0264	Sperm protamine P1	P1	['P1']	ARYRCCRSQSRSRYYRQRQRSRRRRRRSCQTRRRAMRCCRPRYRPRCRRH	ARYRccRSQSRSRYYRQRQRSRRRRRRScQTRRRAMRccRPRYRPRcRRH	C5(Carbamidomethyl); C6(Carbamidomethyl); C29(Carbamidomethyl); C38(Carbamidomethyl); C39(Carbamidomethyl); C47(Carbamidomethyl)	2	51	[]	[]	[]	[]	56.593	93.55	PS-008	0	P|001	7090.92	61.3199	P1	P1 +1(61)	+1(61)	P1	P|001 → P1 +1(61)
A	R02	A_R02	PS	39	23474.2	14.5188	-0.802606	1.1436	7089.62	60.0266	60.0266	Sperm protamine P1	P1	['P1']	ARYRCCRSQSRSRYYRQRQRSRRRRRRSCQTRRRAMRCCRPRYRPRCRRH	ARYRccRSQSRSRYYRQRQRSRRRRRRScQTRRRAMRccRPRYRPRcRRH	C5(Carbamidomethyl); C6(Carbamidomethyl); C29(Carbamidomethyl); C38(Carbamidomethyl); C39(Carbamidomethyl); C47(Carbamidomethyl)	2	51	[]	[]	[]	[]	93.5363	39.13	PS-008	0	P|001	7090.92	61.3199	P1	P1 +1(61)	+1(61)	P1	P|001 → P1 +1(61)
A	R02	A_R02	PS	120	28981.3	14.8228	-0.676834	3.5952	7089.62	60.0269	60.0269	Sperm protamine P1	P1	['P1']	ARYRCCRSQSRSRYYRQRQRSRRRRRRSCQTRRRAMRCCRPRYRPRCRRH	ARYRccRSQSRSRYYRQRQRSRRRRRRScQTRRRAMRccRPRYRPRcRRH	C5(Carbamidomethyl); C6(Carbamidomethyl); C29(Carbamidomethyl); C38(Carbamidomethyl); C39(Carbamidomethyl); C47(Carbamidomethyl)	2	51	[]	[]	[]	[]	116.078	51.41	PS-008	0	P|001	7090.92	61.3199	P1	P1 +1(61)	+1(61)	P1	P|001 → P1 +1(61)
A	R01	A_R01	PS	500	4.3804e+06	22.0626	2.33487	14.4107	7089.62	60.027	60.027	Sperm protamine P1	P1	['P1']	ARYRCCRSQSRSRYYRQRQRSRRRRRRSCQTRRRAMRCCRPRYRPRCRRH	ARYRccRSQSRSRYYRQRQRSRRRRRRScQTRRRAMRccRPRYRPRcRRH	C5(Carbamidomethyl); C6(Carbamidomethyl); C29(Carbamidomethyl); C38(Carbamidomethyl); C39(Carbamidomethyl); C47(Carbamidomethyl)	2	51	[]	[]	[]	[]	108.862	84.6	PS-008	0	P|001	7090.92	61.3199	P1	P1 +1(61)	+1(61)	P1	P|001 → P1 +1(61)
B	R03	B_R03	PS	511	3.39439e+06	21.6947	2.09415	14.8124	7089.62	60.0275	60.0275	Sperm protamine P1	P1	['P1']	ARYRCCRSQSRSRYYRQRQRSRRRRRRSCQTRRRAMRCCRPRYRPRCRRH	ARYRccRSQSRSRYYRQRQRSRRRRRRScQTRRRAMRccRPRYRPRcRRH	C5(Carbamidomethyl); C6(Carbamidomethyl); C29(Carbamidomethyl); C38(Carbamidomethyl); C39(Carbamidomethyl); C47(Carbamidomethyl)	2	51	[]	[]	[]	[]	80.6566	91.77	PS-008	0	P|001	7090.92	61.3199	P1	P1 +1(61)	+1(61)	P1	P|001 → P1 +1(61)
A	R01	A_R01	PS	592	276991	18.0795	0.467105	16.8031	7089.62	60.0283	60.0283	Sperm protamine P1	P1	['P1']	ARYRCCRSQSRSRYYRQRQRSRRRRRRSCQTRRRAMRCCRPRYRPRCRRH	ARYRccRSQSRSRYYRQRQRSRRRRRRScQTRRRAMRccRPRYRPRcRRH	C5(Carbamidomethyl); C6(Carbamidomethyl); C29(Carbamidomethyl); C38(Carbamidomethyl); C39(Carbamidomethyl); C47(Carbamidomethyl)	2	51	[]	[]	[]	[]	33.312	55.23	PS-008	0	P|001	7090.92	61.3199	P1	P1 +1(61)	+1(61)	P1	P|001 → P1 +1(61)
A	R02	A_R02	PS	497	1.1618e+07	23.4699	2.90013	14.5832	7089.62	60.0287	60.0287	Sperm protamine P1	P1	['P1']	ARYRCCRSQSRSRYYRQRQRSRRRRRRSCQTRRRAMRCCRPRYRPRCRRH	ARYRccRSQSRSRYYRQRQRSRRRRRRScQTRRRAMRccRPRYRPRcRRH	C5(Carbamidomethyl); C6(Carbamidomethyl); C29(Carbamidomethyl); C38(Carbamidomethyl); C39(Carbamidomethyl); C47(Carbamidomethyl)	2	51	[]	[]	[]	[]	52.4192	87.71	PS-008	0	P|001	7090.92	61.3199	P1	P1 +1(61)	+1(61)	P1	P|001 → P1 +1(61)
B	R03	B_R03	PS	541	327970	18.3232	0.786905	15.5714	7089.62	60.029	60.029	Sperm protamine P1	P1	['P1']	ARYRCCRSQSRSRYYRQRQRSRRRRRRSCQTRRRAMRCCRPRYRPRCRRH	ARYRccRSQSRSRYYRQRQRSRRRRRRScQTRRRAMRccRPRYRPRcRRH	C5(Carbamidomethyl); C6(Carbamidomethyl); C29(Carbamidomethyl); C38(Carbamidomethyl); C39(Carbamidomethyl); C47(Carbamidomethyl)	2	51	[]	[]	[]	[]	77.2476	69.91	PS-008	0	P|001	7090.92	61.3199	P1	P1 +1(61)	+1(61)	P1	P|001 → P1 +1(61)
A	R01	A_R01	PS	728	94861.1	16.5335	-0.257816	20.7626	7089.62	60.029	60.029	Sperm protamine P1	P1	['P1']	ARYRCCRSQSRSRYYRQRQRSRRRRRRSCQTRRRAMRCCRPRYRPRCRRH	ARYRccRSQSRSRYYRQRQRSRRRRRRScQTRRRAMRccRPRYRPRcRRH	C5(Carbamidomethyl); C6(Carbamidomethyl); C29(Carbamidomethyl); C38(Carbamidomethyl); C39(Carbamidomethyl); C47(Carbamidomethyl)	2	51	[]	[]	[]	[]	87.202	66.79	PS-008	0	P|001	7090.92	61.3199	P1	P1 +1(61)	+1(61)	P1	P|001 → P1 +1(61)
A	R02	A_R02	PS	693	69302.1	16.0806	-0.156536	19.9549	7089.63	60.0294	60.0294	Sperm protamine P1	P1	['P1']	ARYRCCRSQSRSRYYRQRQRSRRRRRRSCQTRRRAMRCCRPRYRPRCRRH	ARYRccRSQSRSRYYRQRQRSRRRRRRScQTRRRAMRccRPRYRPRcRRH	C5(Carbamidomethyl); C6(Carbamidomethyl); C29(Carbamidomethyl); C38(Carbamidomethyl); C39(Carbamidomethyl); C47(Carbamidomethyl)	2	51	[]	[]	[]	[]	23.6578	22.84	PS-008	0	P|001	7090.92	61.3199	P1	P1 +1(61)	+1(61)	P1	P|001 → P1 +1(61)
A	R02	A_R02	PS	801	53554.3	15.7087	-0.310376	23.1179	7089.63	60.0295	60.0295	Sperm protamine P1	P1	['P1']	ARYRCCRSQSRSRYYRQRQRSRRRRRRSCQTRRRAMRCCRPRYRPRCRRH	ARYRccRSQSRSRYYRQRQRSRRRRRRScQTRRRAMRccRPRYRPRcRRH	C5(Carbamidomethyl); C6(Carbamidomethyl); C29(Carbamidomethyl); C38(Carbamidomethyl); C39(Carbamidomethyl); C47(Carbamidomethyl)	2	51	[]	[]	[]	[]	108.471	55.38	PS-008	0	P|001	7090.92	61.3199	P1	P1 +1(61)	+1(61)	P1	P|001 → P1 +1(61)
A	R01	A_R01	PS	538	936357	19.8367	1.2911	15.3134	7089.63	60.03	60.03	Sperm protamine P1	P1	['P1']	ARYRCCRSQSRSRYYRQRQRSRRRRRRSCQTRRRAMRCCRPRYRPRCRRH	ARYRccRSQSRSRYYRQRQRSRRRRRRScQTRRRAMRccRPRYRPRcRRH	C5(Carbamidomethyl); C6(Carbamidomethyl); C29(Carbamidomethyl); C38(Carbamidomethyl); C39(Carbamidomethyl); C47(Carbamidomethyl)	2	51	[]	[]	[]	[]	52.3477	80.12	PS-008	0	P|001	7090.92	61.3199	P1	P1 +1(61)	+1(61)	P1	P|001 → P1 +1(61)
A	R01	A_R01	TP	538	5951000000	32.4705	0.733082	15.3133	7089.63	60.0302	60.0302	P04553	P1	['P1']	ARYRCCRSQSRSRYYRQRQRSRRRRRRSCQTRRRAMRCCRPRYRPRCRRH	M.ARYR(C)[Carbamidomethylation](C)[Carbamidomethylation]RSQSRSRYYRQRQRSRRRRRRS(C)[Carbamidomethylation]QTRRRAMR((C)[Carbamidomethylation](C)[Carbamidomethylation])[60.0352]RPRYRPR(C)[Carbamidomethylation]RRH.		2	51	[]	[]	[]	[]		20.4568	TP-047	0	P|001	7090.92	61.3199	P1	P1 +1(61)	+1(61)	P1	P|001 → P1 +1(61)
A	R02	A_R02	PS	19	12830.2	13.6473	-1.16313	0.5386	7089.63	60.0302	60.0302	Sperm protamine P1	P1	['P1']	ARYRCCRSQSRSRYYRQRQRSRRRRRRSCQTRRRAMRCCRPRYRPRCRRH	ARYRccRSQSRSRYYRQRQRSRRRRRRScQTRRRAMRccRPRYRPRcRRH	C5(Carbamidomethyl); C6(Carbamidomethyl); C29(Carbamidomethyl); C38(Carbamidomethyl); C39(Carbamidomethyl); C47(Carbamidomethyl)	2	51	[]	[]	[]	[]	134.542	31.33	PS-008	0	P|001	7090.92	61.3199	P1	P1 +1(61)	+1(61)	P1	P|001 → P1 +1(61)
A	R02	A_R02	PS	781	56665.3	15.7902	-0.276678	22.53	7089.63	60.0304	60.0304	Sperm protamine P1	P1	['P1']	ARYRCCRSQSRSRYYRQRQRSRRRRRRSCQTRRRAMRCCRPRYRPRCRRH	ARYRccRSQSRSRYYRQRQRSRRRRRRScQTRRRAMRccRPRYRPRcRRH	C5(Carbamidomethyl); C6(Carbamidomethyl); C29(Carbamidomethyl); C38(Carbamidomethyl); C39(Carbamidomethyl); C47(Carbamidomethyl)	2	51	[]	[]	[]	[]	100.123	62.46	PS-008	0	P|001	7090.92	61.3199	P1	P1 +1(61)	+1(61)	P1	P|001 → P1 +1(61)
A	R01	A_R01	PS	722	100180	16.6122	-0.220909	20.5851	7089.63	60.0307	60.0307	Sperm protamine P1	P1	['P1']	ARYRCCRSQSRSRYYRQRQRSRRRRRRSCQTRRRAMRCCRPRYRPRCRRH	ARYRccRSQSRSRYYRQRQRSRRRRRRScQTRRRAMRccRPRYRPRcRRH	C5(Carbamidomethyl); C6(Carbamidomethyl); C29(Carbamidomethyl); C38(Carbamidomethyl); C39(Carbamidomethyl); C47(Carbamidomethyl)	2	51	[]	[]	[]	[]	39.464	67.09	PS-008	0	P|001	7090.92	61.3199	P1	P1 +1(61)	+1(61)	P1	P|001 → P1 +1(61)
A	R01	A_R01	PS	774	50779	15.6319	-0.680584	22.1067	7089.63	60.0308	60.0308	Sperm protamine P1	P1	['P1']	ARYRCCRSQSRSRYYRQRQRSRRRRRRSCQTRRRAMRCCRPRYRPRCRRH	ARYRccRSQSRSRYYRQRQRSRRRRRRScQTRRRAMRccRPRYRPRcRRH	C5(Carbamidomethyl); C6(Carbamidomethyl); C29(Carbamidomethyl); C38(Carbamidomethyl); C39(Carbamidomethyl); C47(Carbamidomethyl)	2	51	[]	[]	[]	[]	70.7634	80.23	PS-008	0	P|001	7090.92	61.3199	P1	P1 +1(61)	+1(61)	P1	P|001 → P1 +1(61)
A	R01	A_R01	TP	566	5951000000	32.4705	0.733082	16.0478	7089.63	60.0312	60.0312	P04553	P1	['P1']	ARYRCCRSQSRSRYYRQRQRSRRRRRRSCQTRRRAMRCCRPRYRPRCRRH	M.ARYR(C)[Carbamidomethylation](C)[Carbamidomethylation]RSQSRSRYYRQRQRSRRRRRRS(C)[Carbamidomethylation]QTRRRAMR(C)[Carbamidomethylation](C)[Carbamidomethylation]R(PRY)[60.0262]RPR(C)[Carbamidomethylation]RRH.		2	51	[]	[]	[]	[]		19.6239	TP-047	0	P|001	7090.92	61.3199	P1	P1 +1(61)	+1(61)	P1	P|001 → P1 +1(61)
A	R01	A_R01	PS	864	93243.4	16.5087	-0.269452	24.7388	7089.63	60.0312	60.0312	Sperm protamine P1	P1	['P1']	ARYRCCRSQSRSRYYRQRQRSRRRRRRSCQTRRRAMRCCRPRYRPRCRRH	ARYRccRSQSRSRYYRQRQRSRRRRRRScQTRRRAMRccRPRYRPRcRRH	C5(Carbamidomethyl); C6(Carbamidomethyl); C29(Carbamidomethyl); C38(Carbamidomethyl); C39(Carbamidomethyl); C47(Carbamidomethyl)	2	51	[]	[]	[]	[]	29.2178	69.41	PS-008	0	P|001	7090.92	61.3199	P1	P1 +1(61)	+1(61)	P1	P|001 → P1 +1(61)
B	R04	B_R04	PS	79	58727.7	15.8418	-0.859875	2.3171	7089.63	60.0316	60.0316	Sperm protamine P1	P1	['P1']	ARYRCCRSQSRSRYYRQRQRSRRRRRRSCQTRRRAMRCCRPRYRPRCRRH	ARYRccRSQSRSRYYRQRQRSRRRRRRScQTRRRAMRccRPRYRPRcRRH	C5(Carbamidomethyl); C6(Carbamidomethyl); C29(Carbamidomethyl); C38(Carbamidomethyl); C39(Carbamidomethyl); C47(Carbamidomethyl)	2	51	[]	[]	[]	[]	117.174	67.41	PS-008	0	P|001	7090.92	61.3199	P1	P1 +1(61)	+1(61)	P1	P|001 → P1 +1(61)
A	R02	A_R02	PS	231	28308.7	14.789	-0.690848	6.9503	7089.63	60.0317	60.0317	Sperm protamine P1	P1	['P1']	ARYRCCRSQSRSRYYRQRQRSRRRRRRSCQTRRRAMRCCRPRYRPRCRRH	ARYRccRSQSRSRYYRQRQRSRRRRRRScQTRRRAMRccRPRYRPRcRRH	C5(Carbamidomethyl); C6(Carbamidomethyl); C29(Carbamidomethyl); C38(Carbamidomethyl); C39(Carbamidomethyl); C47(Carbamidomethyl)	2	51	[]	[]	[]	[]	115.856	28.94	PS-008	0	P|001	7090.92	61.3199	P1	P1 +1(61)	+1(61)	P1	P|001 → P1 +1(61)
B	R03	B_R03	PS	489	2.11387e+06	21.0115	1.82923	14.2868	7089.63	60.0326	60.0326	Sperm protamine P1	P1	['P1']	ARYRCCRSQSRSRYYRQRQRSRRRRRRSCQTRRRAMRCCRPRYRPRCRRH	ARYRccRSQSRSRYYRQRQRSRRRRRRScQTRRRAMRccRPRYRPRcRRH	C5(Carbamidomethyl); C6(Carbamidomethyl); C29(Carbamidomethyl); C38(Carbamidomethyl); C39(Carbamidomethyl); C47(Carbamidomethyl)	2	51	[]	[]	[]	[]	118.193	94.62	PS-008	0	P|001	7090.92	61.3199	P1	P1 +1(61)	+1(61)	P1	P|001 → P1 +1(61)
A	R02	A_R02	PS	763	71018.9	16.1159	-0.141933	22.0049	7089.63	60.0329	60.0329	Sperm protamine P1	P1	['P1']	ARYRCCRSQSRSRYYRQRQRSRRRRRRSCQTRRRAMRCCRPRYRPRCRRH	ARYRccRSQSRSRYYRQRQRSRRRRRRScQTRRRAMRccRPRYRPRcRRH	C5(Carbamidomethyl); C6(Carbamidomethyl); C29(Carbamidomethyl); C38(Carbamidomethyl); C39(Carbamidomethyl); C47(Carbamidomethyl)	2	51	[]	[]	[]	[]	19.0974	66.7	PS-008	0	P|001	7090.92	61.3199	P1	P1 +1(61)	+1(61)	P1	P|001 → P1 +1(61)
A	R01	A_R01	PS	832	33719	15.0413	-0.95756	23.8024	7089.63	60.0342	60.0342	Sperm protamine P1	P1	['P1']	ARYRCCRSQSRSRYYRQRQRSRRRRRRSCQTRRRAMRCCRPRYRPRCRRH	ARYRccRSQSRSRYYRQRQRSRRRRRRScQTRRRAMRccRPRYRPRcRRH	C5(Carbamidomethyl); C6(Carbamidomethyl); C29(Carbamidomethyl); C38(Carbamidomethyl); C39(Carbamidomethyl); C47(Carbamidomethyl)	2	51	[]	[]	[]	[]	48.8529	72.38	PS-008	0	P|001	7090.92	61.3199	P1	P1 +1(61)	+1(61)	P1	P|001 → P1 +1(61)
B	R04	B_R04	PS	139	53559.3	15.7088	-0.912201	4.1062	7089.63	60.0343	60.0343	Sperm protamine P1	P1	['P1']	ARYRCCRSQSRSRYYRQRQRSRRRRRRSCQTRRRAMRCCRPRYRPRCRRH	ARYRccRSQSRSRYYRQRQRSRRRRRRScQTRRRAMRccRPRYRPRcRRH	C5(Carbamidomethyl); C6(Carbamidomethyl); C29(Carbamidomethyl); C38(Carbamidomethyl); C39(Carbamidomethyl); C47(Carbamidomethyl)	2	51	[]	[]	[]	[]	31.0066	58.85	PS-008	0	P|001	7090.92	61.3199	P1	P1 +1(61)	+1(61)	P1	P|001 → P1 +1(61)
A	R02	A_R02	PS	197	24444.4	14.5772	-0.778437	5.9221	7089.63	60.0353	60.0353	Sperm protamine P1	P1	['P1']	ARYRCCRSQSRSRYYRQRQRSRRRRRRSCQTRRRAMRCCRPRYRPRCRRH	ARYRccRSQSRSRYYRQRQRSRRRRRRScQTRRRAMRccRPRYRPRcRRH	C5(Carbamidomethyl); C6(Carbamidomethyl); C29(Carbamidomethyl); C38(Carbamidomethyl); C39(Carbamidomethyl); C47(Carbamidomethyl)	2	51	[]	[]	[]	[]	71.7485	38.81	PS-008	0	P|001	7090.92	61.3199	P1	P1 +1(61)	+1(61)	P1	P|001 → P1 +1(61)
A	R01	A_R01	PS	810	108762	16.7308	-0.165308	23.1605	7089.63	60.0353	60.0353	Sperm protamine P1	P1	['P1']	ARYRCCRSQSRSRYYRQRQRSRRRRRRSCQTRRRAMRCCRPRYRPRCRRH	ARYRccRSQSRSRYYRQRQRSRRRRRRScQTRRRAMRccRPRYRPRcRRH	C5(Carbamidomethyl); C6(Carbamidomethyl); C29(Carbamidomethyl); C38(Carbamidomethyl); C39(Carbamidomethyl); C47(Carbamidomethyl)	2	51	[]	[]	[]	[]	112.431	76.58	PS-008	0	P|001	7090.92	61.3199	P1	P1 +1(61)	+1(61)	P1	P|001 → P1 +1(61)
A	R01	A_R01	PS	498	5.74904e+06	22.4549	2.51881	14.364	7089.63	60.0373	60.0373	Sperm protamine P1	P1	['P1']	ARYRCCRSQSRSRYYRQRQRSRRRRRRSCQTRRRAMRCCRPRYRPRCRRH	ARYRccRSQSRSRYYRQRQRSRRRRRRScQTRRRAMRccRPRYRPRcRRH	C5(Carbamidomethyl); C6(Carbamidomethyl); C29(Carbamidomethyl); C38(Carbamidomethyl); C39(Carbamidomethyl); C47(Carbamidomethyl)	2	51	[]	[]	[]	[]	57.5929	72.03	PS-008	0	P|001	7090.92	61.3199	P1	P1 +1(61)	+1(61)	P1	P|001 → P1 +1(61)
B	R04	B_R04	PS	17	36365.2	15.1503	-1.13212	0.4782	7089.63	60.0375	60.0375	Sperm protamine P1	P1	['P1']	ARYRCCRSQSRSRYYRQRQRSRRRRRRSCQTRRRAMRCCRPRYRPRCRRH	ARYRccRSQSRSRYYRQRQRSRRRRRRScQTRRRAMRccRPRYRPRcRRH	C5(Carbamidomethyl); C6(Carbamidomethyl); C29(Carbamidomethyl); C38(Carbamidomethyl); C39(Carbamidomethyl); C47(Carbamidomethyl)	2	51	[]	[]	[]	[]	87.8771	34.66	PS-008	0	P|001	7090.92	61.3199	P1	P1 +1(61)	+1(61)	P1	P|001 → P1 +1(61)
B	R04	B_R04	PS	235	35946.3	15.1336	-1.1387	6.9802	7089.63	60.0375	60.0375	Sperm protamine P1	P1	['P1']	ARYRCCRSQSRSRYYRQRQRSRRRRRRSCQTRRRAMRCCRPRYRPRCRRH	ARYRccRSQSRSRYYRQRQRSRRRRRRScQTRRRAMRccRPRYRPRcRRH	C5(Carbamidomethyl); C6(Carbamidomethyl); C29(Carbamidomethyl); C38(Carbamidomethyl); C39(Carbamidomethyl); C47(Carbamidomethyl)	2	51	[]	[]	[]	[]	54.1391	47.01	PS-008	0	P|001	7090.92	61.3199	P1	P1 +1(61)	+1(61)	P1	P|001 → P1 +1(61)
A	R01	A_R01	PS	566	327943	18.3231	0.581338	16.0479	7089.63	60.0375	60.0375	Sperm protamine P1	P1	['P1']	ARYRCCRSQSRSRYYRQRQRSRRRRRRSCQTRRRAMRCCRPRYRPRCRRH	ARYRccRSQSRSRYYRQRQRSRRRRRRScQTRRRAMRccRPRYRPRcRRH	C5(Carbamidomethyl); C6(Carbamidomethyl); C29(Carbamidomethyl); C38(Carbamidomethyl); C39(Carbamidomethyl); C47(Carbamidomethyl)	2	51	[]	[]	[]	[]	70.7245	82.33	PS-008	0	P|001	7090.92	61.3199	P1	P1 +1(61)	+1(61)	P1	P|001 → P1 +1(61)
B	R04	B_R04	PS	39	64958.5	15.9872	-0.802599	1.1285	7089.63	60.0382	60.0382	Sperm protamine P1	P1	['P1']	ARYRCCRSQSRSRYYRQRQRSRRRRRRSCQTRRRAMRCCRPRYRPRCRRH	ARYRccRSQSRSRYYRQRQRSRRRRRRScQTRRRAMRccRPRYRPRcRRH	C5(Carbamidomethyl); C6(Carbamidomethyl); C29(Carbamidomethyl); C38(Carbamidomethyl); C39(Carbamidomethyl); C47(Carbamidomethyl)	2	51	[]	[]	[]	[]	89.5103	58.78	PS-008	0	P|001	7090.92	61.3199	P1	P1 +1(61)	+1(61)	P1	P|001 → P1 +1(61)
B	R03	B_R03	PS	145	21218.2	14.373	-0.74471	4.327	7089.63	60.0383	60.0383	Sperm protamine P1	P1	['P1']	ARYRCCRSQSRSRYYRQRQRSRRRRRRSCQTRRRAMRCCRPRYRPRCRRH	ARYRccRSQSRSRYYRQRQRSRRRRRRScQTRRRAMRccRPRYRPRcRRH	C5(Carbamidomethyl); C6(Carbamidomethyl); C29(Carbamidomethyl); C38(Carbamidomethyl); C39(Carbamidomethyl); C47(Carbamidomethyl)	2	51	[]	[]	[]	[]	114.73	26.99	PS-008	0	P|001	7090.92	61.3199	P1	P1 +1(61)	+1(61)	P1	P|001 → P1 +1(61)
B	R03	B_R03	PS	35	15454.7	13.9158	-0.922006	1.0171	7089.63	60.0383	60.0383	Sperm protamine P1	P1	['P1']	ARYRCCRSQSRSRYYRQRQRSRRRRRRSCQTRRRAMRCCRPRYRPRCRRH	ARYRccRSQSRSRYYRQRQRSRRRRRRScQTRRRAMRccRPRYRPRcRRH	C5(Carbamidomethyl); C6(Carbamidomethyl); C29(Carbamidomethyl); C38(Carbamidomethyl); C39(Carbamidomethyl); C47(Carbamidomethyl)	2	51	[]	[]	[]	[]	112.034	19.03	PS-008	0	P|001	7090.92	61.3199	P1	P1 +1(61)	+1(61)	P1	P|001 → P1 +1(61)
B	R04	B_R04	PS	19	51946.3	15.6647	-0.92957	0.5376	7089.63	60.0392	60.0392	Sperm protamine P1	P1	['P1']	ARYRCCRSQSRSRYYRQRQRSRRRRRRSCQTRRRAMRCCRPRYRPRCRRH	ARYRccRSQSRSRYYRQRQRSRRRRRRScQTRRRAMRccRPRYRPRcRRH	C5(Carbamidomethyl); C6(Carbamidomethyl); C29(Carbamidomethyl); C38(Carbamidomethyl); C39(Carbamidomethyl); C47(Carbamidomethyl)	2	51	[]	[]	[]	[]	28.2356	38.88	PS-008	0	P|001	7090.92	61.3199	P1	P1 +1(61)	+1(61)	P1	P|001 → P1 +1(61)
A	R02	A_R02	PS	495	1.16691e+07	23.4762	2.90275	14.5377	7089.64	60.0394	60.0394	Sperm protamine P1	P1	['P1']	ARYRCCRSQSRSRYYRQRQRSRRRRRRSCQTRRRAMRCCRPRYRPRCRRH	ARYRccRSQSRSRYYRQRQRSRRRRRRScQTRRRAMRccRPRYRPRcRRH	C5(Carbamidomethyl); C6(Carbamidomethyl); C29(Carbamidomethyl); C38(Carbamidomethyl); C39(Carbamidomethyl); C47(Carbamidomethyl)	2	51	[]	[]	[]	[]	46.9866	82.16	PS-008	0	P|001	7090.92	61.3199	P1	P1 +1(61)	+1(61)	P1	P|001 → P1 +1(61)
B	R03	B_R03	PS	170	18756	14.1951	-0.813708	5.0817	7089.64	60.0402	60.0402	Sperm protamine P1	P1	['P1']	ARYRCCRSQSRSRYYRQRQRSRRRRRRSCQTRRRAMRCCRPRYRPRCRRH	ARYRccRSQSRSRYYRQRQRSRRRRRRScQTRRRAMRccRPRYRPRcRRH	C5(Carbamidomethyl); C6(Carbamidomethyl); C29(Carbamidomethyl); C38(Carbamidomethyl); C39(Carbamidomethyl); C47(Carbamidomethyl)	2	51	[]	[]	[]	[]	112.547	18.4	PS-008	0	P|001	7090.92	61.3199	P1	P1 +1(61)	+1(61)	P1	P|001 → P1 +1(61)
A	R01	A_R01	PS	788	59748.6	15.8666	-0.570543	22.5198	7089.64	60.0415	60.0415	Sperm protamine P1	P1	['P1']	ARYRCCRSQSRSRYYRQRQRSRRRRRRSCQTRRRAMRCCRPRYRPRCRRH	ARYRccRSQSRSRYYRQRQRSRRRRRRScQTRRRAMRccRPRYRPRcRRH	C5(Carbamidomethyl); C6(Carbamidomethyl); C29(Carbamidomethyl); C38(Carbamidomethyl); C39(Carbamidomethyl); C47(Carbamidomethyl)	2	51	[]	[]	[]	[]	42.0975	66.29	PS-008	0	P|001	7090.92	61.3199	P1	P1 +1(61)	+1(61)	P1	P|001 → P1 +1(61)
B	R03	B_R03	PS	505	8.75473e+06	23.0616	2.62415	14.6728	7089.64	60.0419	60.0419	Sperm protamine P1	P1	['P1']	ARYRCCRSQSRSRYYRQRQRSRRRRRRSCQTRRRAMRCCRPRYRPRCRRH	ARYRccRSQSRSRYYRQRQRSRRRRRRScQTRRRAMRccRPRYRPRcRRH	C5(Carbamidomethyl); C6(Carbamidomethyl); C29(Carbamidomethyl); C38(Carbamidomethyl); C39(Carbamidomethyl); C47(Carbamidomethyl)	2	51	[]	[]	[]	[]	50.1018	88.96	PS-008	0	P|001	7090.92	61.3199	P1	P1 +1(61)	+1(61)	P1	P|001 → P1 +1(61)
A	R02	A_R02	PS	116	28493.2	14.7983	-0.68697	3.474	7089.64	60.0419	60.0419	Sperm protamine P1	P1	['P1']	ARYRCCRSQSRSRYYRQRQRSRRRRRRSCQTRRRAMRCCRPRYRPRCRRH	ARYRccRSQSRSRYYRQRQRSRRRRRRScQTRRRAMRccRPRYRPRcRRH	C5(Carbamidomethyl); C6(Carbamidomethyl); C29(Carbamidomethyl); C38(Carbamidomethyl); C39(Carbamidomethyl); C47(Carbamidomethyl)	2	51	[]	[]	[]	[]	97.943	35.1	PS-008	0	P|001	7090.92	61.3199	P1	P1 +1(61)	+1(61)	P1	P|001 → P1 +1(61)
B	R03	B_R03	TP	551	4378000000	32.0276	0.813286	15.868	7089.64	60.0425	60.0425	P04553	P1	['P1']	ARYRCCRSQSRSRYYRQRQRSRRRRRRSCQTRRRAMRCCRPRYRPRCRRH	M.ARYR(C)[Carbamidomethylation](C)[Carbamidomethylation]RSQSRSRYYRQRQRSRRRRRRS(C)[Carbamidomethylation]QTRRRAMR(C)[Carbamidomethylation](C)[Carbamidomethylation]R(PRY)[60.0325]RPR(C)[Carbamidomethylation]RRH.		2	51	[]	[]	[]	[]		22.218	TP-047	0	P|001	7090.92	61.3199	P1	P1 +1(61)	+1(61)	P1	P|001 → P1 +1(61)
B	R04	B_R04	PS	159	49484.1	15.5947	-0.957152	4.7024	7089.64	60.0433	60.0433	Sperm protamine P1	P1	['P1']	ARYRCCRSQSRSRYYRQRQRSRRRRRRSCQTRRRAMRCCRPRYRPRCRRH	ARYRccRSQSRSRYYRQRQRSRRRRRRScQTRRRAMRccRPRYRPRcRRH	C5(Carbamidomethyl); C6(Carbamidomethyl); C29(Carbamidomethyl); C38(Carbamidomethyl); C39(Carbamidomethyl); C47(Carbamidomethyl)	2	51	[]	[]	[]	[]	89.5454	36.63	PS-008	0	P|001	7090.92	61.3199	P1	P1 +1(61)	+1(61)	P1	P|001 → P1 +1(61)
A	R01	A_R01	TP	784	5951000000	32.4705	0.733082	22.4033	7089.64	60.044	60.044	P04553	P1	['P1']	ARYRCCRSQSRSRYYRQRQRSRRRRRRSCQTRRRAMRCCRPRYRPRCRRH	M.ARYR(C)[Carbamidomethylation](C)[Carbamidomethylation]RSQSRSRYYRQRQRSRRRRR(RS(C)[Carbamidomethylation]Q)[60.0340]TRRRAMR(C)[Carbamidomethylation](C)[Carbamidomethylation]RPRYRPR(C)[Carbamidomethylation]RRH.		2	51	[]	[]	[]	[]		17.1672	TP-047	0	P|001	7090.92	61.3199	P1	P1 +1(61)	+1(61)	P1	P|001 → P1 +1(61)
B	R04	B_R04	PS	81	53994.7	15.7205	-0.907602	2.3769	7089.64	60.0447	60.0447	Sperm protamine P1	P1	['P1']	ARYRCCRSQSRSRYYRQRQRSRRRRRRSCQTRRRAMRCCRPRYRPRCRRH	ARYRccRSQSRSRYYRQRQRSRRRRRRScQTRRRAMRccRPRYRPRcRRH	C5(Carbamidomethyl); C6(Carbamidomethyl); C29(Carbamidomethyl); C38(Carbamidomethyl); C39(Carbamidomethyl); C47(Carbamidomethyl)	2	51	[]	[]	[]	[]	81.3816	49.71	PS-008	0	P|001	7090.92	61.3199	P1	P1 +1(61)	+1(61)	P1	P|001 → P1 +1(61)
A	R02	A_R02	TP	521	3803000000	31.8245	0.630367	15.1363	7089.64	60.0448	60.0448	P04553	P1	['P1']	ARYRCCRSQSRSRYYRQRQRSRRRRRRSCQTRRRAMRCCRPRYRPRCRRH	M.ARYR(C)[Carbamidomethylation](C)[Carbamidomethylation]RSQSRSRYYRQRQRSRRRRRRS(C)[Carbamidomethylation]QTRRR(AM)[60.0298]R(C)[Carbamidomethylation](C)[Carbamidomethylation]RPRYRPR(C)[Carbamidomethylation]RRH.		2	51	[]	[]	[]	[]		23.3284	TP-047	0	P|001	7090.92	61.3199	P1	P1 +1(61)	+1(61)	P1	P|001 → P1 +1(61)
A	R02	A_R02	PS	167	24100.4	14.5568	-0.786895	5.0156	7089.64	60.046	60.046	Sperm protamine P1	P1	['P1']	ARYRCCRSQSRSRYYRQRQRSRRRRRRSCQTRRRAMRCCRPRYRPRCRRH	ARYRccRSQSRSRYYRQRQRSRRRRRRScQTRRRAMRccRPRYRPRcRRH	C5(Carbamidomethyl); C6(Carbamidomethyl); C29(Carbamidomethyl); C38(Carbamidomethyl); C39(Carbamidomethyl); C47(Carbamidomethyl)	2	51	[]	[]	[]	[]	105.448	44.22	PS-008	0	P|001	7090.92	61.3199	P1	P1 +1(61)	+1(61)	P1	P|001 → P1 +1(61)
A	R02	A_R02	PS	142	26334.9	14.6847	-0.733979	4.2611	7089.64	60.0467	60.0467	Sperm protamine P1	P1	['P1']	ARYRCCRSQSRSRYYRQRQRSRRRRRRSCQTRRRAMRCCRPRYRPRCRRH	ARYRccRSQSRSRYYRQRQRSRRRRRRScQTRRRAMRccRPRYRPRcRRH	C5(Carbamidomethyl); C6(Carbamidomethyl); C29(Carbamidomethyl); C38(Carbamidomethyl); C39(Carbamidomethyl); C47(Carbamidomethyl)	2	51	[]	[]	[]	[]	139.705	39.61	PS-008	0	P|001	7090.92	61.3199	P1	P1 +1(61)	+1(61)	P1	P|001 → P1 +1(61)
B	R04	B_R04	PS	175	36063.8	15.1383	-1.13685	5.1811	7089.64	60.0468	60.0468	Sperm protamine P1	P1	['P1']	ARYRCCRSQSRSRYYRQRQRSRRRRRRSCQTRRRAMRCCRPRYRPRCRRH	ARYRccRSQSRSRYYRQRQRSRRRRRRScQTRRRAMRccRPRYRPRcRRH	C5(Carbamidomethyl); C6(Carbamidomethyl); C29(Carbamidomethyl); C38(Carbamidomethyl); C39(Carbamidomethyl); C47(Carbamidomethyl)	2	51	[]	[]	[]	[]	35.2392	26.11	PS-008	0	P|001	7090.92	61.3199	P1	P1 +1(61)	+1(61)	P1	P|001 → P1 +1(61)
A	R02	A_R02	PS	75	28461.9	14.7967	-0.687627	2.2326	7089.64	60.0484	60.0484	Sperm protamine P1	P1	['P1']	ARYRCCRSQSRSRYYRQRQRSRRRRRRSCQTRRRAMRCCRPRYRPRCRRH	ARYRccRSQSRSRYYRQRQRSRRRRRRScQTRRRAMRccRPRYRPRcRRH	C5(Carbamidomethyl); C6(Carbamidomethyl); C29(Carbamidomethyl); C38(Carbamidomethyl); C39(Carbamidomethyl); C47(Carbamidomethyl)	2	51	[]	[]	[]	[]	116.708	37.63	PS-008	0	P|001	7090.92	61.3199	P1	P1 +1(61)	+1(61)	P1	P|001 → P1 +1(61)
B	R04	B_R04	PS	199	53819.2	15.7158	-0.909451	5.8994	7089.65	60.0542	60.0542	Sperm protamine P1	P1	['P1']	ARYRCCRSQSRSRYYRQRQRSRRRRRRSCQTRRRAMRCCRPRYRPRCRRH	ARYRccRSQSRSRYYRQRQRSRRRRRRScQTRRRAMRccRPRYRPRcRRH	C5(Carbamidomethyl); C6(Carbamidomethyl); C29(Carbamidomethyl); C38(Carbamidomethyl); C39(Carbamidomethyl); C47(Carbamidomethyl)	2	51	[]	[]	[]	[]	119.372	48.18	PS-008	0	P|001	7090.92	61.3199	P1	P1 +1(61)	+1(61)	P1	P|001 → P1 +1(61)
B	R04	B_R04	PS	255	26716.5	14.7054	-1.30725	7.5799	7089.65	60.0542	60.0542	Sperm protamine P1	P1	['P1']	ARYRCCRSQSRSRYYRQRQRSRRRRRRSCQTRRRAMRCCRPRYRPRCRRH	ARYRccRSQSRSRYYRQRQRSRRRRRRScQTRRRAMRccRPRYRPRcRRH	C5(Carbamidomethyl); C6(Carbamidomethyl); C29(Carbamidomethyl); C38(Carbamidomethyl); C39(Carbamidomethyl); C47(Carbamidomethyl)	2	51	[]	[]	[]	[]	105.337	40.7	PS-008	0	P|001	7090.92	61.3199	P1	P1 +1(61)	+1(61)	P1	P|001 → P1 +1(61)
B	R03	B_R03	PS	517	1.62031e+06	20.6278	1.68049	14.9502	7089.65	60.0573	60.0573	Sperm protamine P1	P1	['P1']	ARYRCCRSQSRSRYYRQRQRSRRRRRRSCQTRRRAMRCCRPRYRPRCRRH	ARYRccRSQSRSRYYRQRQRSRRRRRRScQTRRRAMRccRPRYRPRcRRH	C5(Carbamidomethyl); C6(Carbamidomethyl); C29(Carbamidomethyl); C38(Carbamidomethyl); C39(Carbamidomethyl); C47(Carbamidomethyl)	2	51	[]	[]	[]	[]	87.5227	77.24	PS-008	0	P|001	7090.92	61.3199	P1	P1 +1(61)	+1(61)	P1	P|001 → P1 +1(61)
B	R04	B_R04	PS	179	53528.7	15.708	-0.912525	5.3007	7089.66	60.0598	60.0598	Sperm protamine P1	P1	['P1']	ARYRCCRSQSRSRYYRQRQRSRRRRRRSCQTRRRAMRCCRPRYRPRCRRH	ARYRccRSQSRSRYYRQRQRSRRRRRRScQTRRRAMRccRPRYRPRcRRH	C5(Carbamidomethyl); C6(Carbamidomethyl); C29(Carbamidomethyl); C38(Carbamidomethyl); C39(Carbamidomethyl); C47(Carbamidomethyl)	2	51	[]	[]	[]	[]	133.978	51.53	PS-008	0	P|001	7090.92	61.3199	P1	P1 +1(61)	+1(61)	P1	P|001 → P1 +1(61)
B	R04	B_R04	PS	215	36083	15.139	-1.13654	6.3785	7089.66	60.0635	60.0635	Sperm protamine P1	P1	['P1']	ARYRCCRSQSRSRYYRQRQRSRRRRRRSCQTRRRAMRCCRPRYRPRCRRH	ARYRccRSQSRSRYYRQRQRSRRRRRRScQTRRRAMRccRPRYRPRcRRH	C5(Carbamidomethyl); C6(Carbamidomethyl); C29(Carbamidomethyl); C38(Carbamidomethyl); C39(Carbamidomethyl); C47(Carbamidomethyl)	2	51	[]	[]	[]	[]	85.8023	44.14	PS-008	0	P|001	7090.92	61.3199	P1	P1 +1(61)	+1(61)	P1	P|001 → P1 +1(61)
A	R02	A_R02	PS	523	703221	19.4236	1.22635	15.188	7089.66	60.065	60.065	Sperm protamine P1	P1	['P1']	ARYRCCRSQSRSRYYRQRQRSRRRRRRSCQTRRRAMRCCRPRYRPRCRRH	ARYRccRSQSRSRYYRQRQRSRRRRRRScQTRRRAMRccRPRYRPRcRRH	C5(Carbamidomethyl); C6(Carbamidomethyl); C29(Carbamidomethyl); C38(Carbamidomethyl); C39(Carbamidomethyl); C47(Carbamidomethyl)	2	51	[]	[]	[]	[]	116.17	86.59	PS-008	0	P|001	7090.92	61.3199	P1	P1 +1(61)	+1(61)	P1	P|001 → P1 +1(61)
B	R04	B_R04	PS	41	42854.5	15.3872	-1.03885	1.1876	7089.66	60.0652	60.0652	Sperm protamine P1	P1	['P1']	ARYRCCRSQSRSRYYRQRQRSRRRRRRSCQTRRRAMRCCRPRYRPRCRRH	ARYRccRSQSRSRYYRQRQRSRRRRRRScQTRRRAMRccRPRYRPRcRRH	C5(Carbamidomethyl); C6(Carbamidomethyl); C29(Carbamidomethyl); C38(Carbamidomethyl); C39(Carbamidomethyl); C47(Carbamidomethyl)	2	51	[]	[]	[]	[]	78.366	32.63	PS-008	0	P|001	7090.92	61.3199	P1	P1 +1(61)	+1(61)	P1	P|001 → P1 +1(61)
B	R04	B_R04	PS	115	46867.8	15.5163	-0.988006	3.389	7089.67	60.0753	60.0753	Sperm protamine P1	P1	['P1']	ARYRCCRSQSRSRYYRQRQRSRRRRRRSCQTRRRAMRCCRPRYRPRCRRH	ARYRccRSQSRSRYYRQRQRSRRRRRRScQTRRRAMRccRPRYRPRcRRH	C5(Carbamidomethyl); C6(Carbamidomethyl); C29(Carbamidomethyl); C38(Carbamidomethyl); C39(Carbamidomethyl); C47(Carbamidomethyl)	2	51	[]	[]	[]	[]	124.285	42.2	PS-008	0	P|001	7090.92	61.3199	P1	P1 +1(61)	+1(61)	P1	P|001 → P1 +1(61)
A	R02	A_R02	PS	79	30671.6	14.9046	-0.643004	2.3538	7089.67	60.0755	60.0755	Sperm protamine P1	P1	['P1']	ARYRCCRSQSRSRYYRQRQRSRRRRRRSCQTRRRAMRCCRPRYRPRCRRH	ARYRccRSQSRSRYYRQRQRSRRRRRRScQTRRRAMRccRPRYRPRcRRH	C5(Carbamidomethyl); C6(Carbamidomethyl); C29(Carbamidomethyl); C38(Carbamidomethyl); C39(Carbamidomethyl); C47(Carbamidomethyl)	2	51	[]	[]	[]	[]	118.951	31.2	PS-008	0	P|001	7090.92	61.3199	P1	P1 +1(61)	+1(61)	P1	P|001 → P1 +1(61)
A	R02	A_R02	PS	59	29840.2	14.865	-0.659403	1.7477	7089.67	60.0769	60.0769	Sperm protamine P1	P1	['P1']	ARYRCCRSQSRSRYYRQRQRSRRRRRRSCQTRRRAMRCCRPRYRPRCRRH	ARYRccRSQSRSRYYRQRQRSRRRRRRScQTRRRAMRccRPRYRPRcRRH	C5(Carbamidomethyl); C6(Carbamidomethyl); C29(Carbamidomethyl); C38(Carbamidomethyl); C39(Carbamidomethyl); C47(Carbamidomethyl)	2	51	[]	[]	[]	[]	150.864	40.98	PS-008	0	P|001	7090.92	61.3199	P1	P1 +1(61)	+1(61)	P1	P|001 → P1 +1(61)
A	R01	A_R01	PS	548	823264	19.651	1.20402	15.5558	7090.61	61.0105	61.0105	Sperm protamine P1	P1	['P1']	ARYRCCRSQSRSRYYRQRQRSRRRRRRSCQTRRRAMRCCRPRYRPRCRRH	ARYRccRSQSRSRYYRQRQRSRRRRRRScQTRRRAMRccRPRYRPRcRRH	C5(Carbamidomethyl); C6(Carbamidomethyl); C29(Carbamidomethyl); C38(Carbamidomethyl); C39(Carbamidomethyl); C47(Carbamidomethyl)	2	51	[]	[]	[]	[]	122.702	59.86	PS-008	0	P|001	7090.92	61.3199	P1	P1 +1(61)	+1(61)	P1	P|001 → P1 +1(61)
B	R04	B_R04	TP	583	2764000000	31.3641	0.0170419	16.3045	7090.61	61.0171	61.0171	P04553	P1	['P1']	ARYRCCRSQSRSRYYRQRQRSRRRRRRSCQTRRRAMRCCRPRYRPRCRRH	M.ARYR(C)[Carbamidomethylation](C)[Carbamidomethylation]RSQSRSRYYRQRQRSRRRRRRS(C)[Carbamidomethylation]QTRRRAMR(C)[Carbamidomethylation](C)[Carbamidomethylation]R(PR)[61.0321]YRPR(C)[Carbamidomethylation]RRH.		2	51	[]	[]	[]	[]		23.4369	TP-047	0	P|001	7090.92	61.3199	P1	P1 +1(61)	+1(61)	P1	P|001 → P1 +1(61)
A	R01	A_R01	TP	830	5951000000	32.4705	0.733082	23.7438	7090.61	61.0182	61.0182	P04553	P1	['P1']	ARYRCCRSQSRSRYYRQRQRSRRRRRRSCQTRRRAMRCCRPRYRPRCRRH	M.ARYR(C)[Carbamidomethylation](C)[Carbamidomethylation]RSQSRSRYYRQRQRSRRRRRRS((C)[Carbamidomethylation]Q)[61.0332]TRRRAMR(C)[Carbamidomethylation](C)[Carbamidomethylation]RPRYRPR(C)[Carbamidomethylation]RRH.		2	51	[]	[]	[]	[]		22.2055	TP-047	0	P|001	7090.92	61.3199	P1	P1 +1(61)	+1(61)	P1	P|001 → P1 +1(61)
A	R02	A_R02	TP	19	3803000000	31.8245	0.630367	0.538667	7090.62	61.0207	61.0207	P04553	P1	['P1']	ARYRCCRSQSRSRYYRQRQRSRRRRRRSCQTRRRAMRCCRPRYRPRCRRH	M.ARYR(C)[Carbamidomethylation](C)[Carbamidomethylation]RSQSRSRYYRQRQRSRRRRRR(S(C)[Carbamidomethylation])[61.0307]QTRRRAMR(C)[Carbamidomethylation](C)[Carbamidomethylation]RPRYRPR(C)[Carbamidomethylation]RRH.		2	51	[]	[]	[]	[]		15.6361	TP-047	0	P|001	7090.92	61.3199	P1	P1 +1(61)	+1(61)	P1	P|001 → P1 +1(61)
A	R01	A_R01	PS	566	64258.3	15.9716	-0.521316	16.0479	7090.62	61.0251	61.0251	Sperm protamine P1	P1	['P1']	ARYRCCRSQSRSRYYRQRQRSRRRRRRSCQTRRRAMRCCRPRYRPRCRRH	ARYRccRSQSRSRYYRQRQRSRRRRRRScQTRRRAMRccRPRYRPRcRRH	C5(Carbamidomethyl); C6(Carbamidomethyl); C29(Carbamidomethyl); C38(Carbamidomethyl); C39(Carbamidomethyl); C47(Carbamidomethyl)	2	51	[]	[]	[]	[]	73.3882	60.75	PS-008	0	P|001	7090.92	61.3199	P1	P1 +1(61)	+1(61)	P1	P|001 → P1 +1(61)
B	R04	B_R04	PS	549	2.13762e+06	21.0276	1.18184	15.4989	7090.62	61.027	61.027	Sperm protamine P1	P1	['P1']	ARYRCCRSQSRSRYYRQRQRSRRRRRRSCQTRRRAMRCCRPRYRPRCRRH	ARYRccRSQSRSRYYRQRQRSRRRRRRScQTRRRAMRccRPRYRPRcRRH	C5(Carbamidomethyl); C6(Carbamidomethyl); C29(Carbamidomethyl); C38(Carbamidomethyl); C39(Carbamidomethyl); C47(Carbamidomethyl)	2	51	[]	[]	[]	[]	110.021	69.08	PS-008	0	P|001	7090.92	61.3199	P1	P1 +1(61)	+1(61)	P1	P|001 → P1 +1(61)
A	R01	A_R01	PS	702	112963	16.7855	-0.139665	19.9993	7090.62	61.0285	61.0285	Sperm protamine P1	P1	['P1']	ARYRCCRSQSRSRYYRQRQRSRRRRRRSCQTRRRAMRCCRPRYRPRCRRH	ARYRccRSQSRSRYYRQRQRSRRRRRRScQTRRRAMRccRPRYRPRcRRH	C5(Carbamidomethyl); C6(Carbamidomethyl); C29(Carbamidomethyl); C38(Carbamidomethyl); C39(Carbamidomethyl); C47(Carbamidomethyl)	2	51	[]	[]	[]	[]	70.418	61.42	PS-008	0	P|001	7090.92	61.3199	P1	P1 +1(61)	+1(61)	P1	P|001 → P1 +1(61)
B	R03	B_R03	TP	489	4378000000	32.0276	0.813286	14.2868	7090.63	61.0296	61.0296	P04553	P1	['P1']	ARYRCCRSQSRSRYYRQRQRSRRRRRRSCQTRRRAMRCCRPRYRPRCRRH	M.ARYR(C)[Carbamidomethylation](C)[Carbamidomethylation]RSQSRSRYYRQRQRSRRRR(R)[61.0346]RS(C)[Carbamidomethylation]QTRRRAMR(C)[Carbamidomethylation](C)[Carbamidomethylation]RPRYRPR(C)[Carbamidomethylation]RRH.		2	51	[]	[]	[]	[]		23.4554	TP-047	0	P|001	7090.92	61.3199	P1	P1 +1(61)	+1(61)	P1	P|001 → P1 +1(61)
B	R04	B_R04	PS	583	630249	19.2656	0.488119	16.3045	7090.63	61.0306	61.0306	Sperm protamine P1	P1	['P1']	ARYRCCRSQSRSRYYRQRQRSRRRRRRSCQTRRRAMRCCRPRYRPRCRRH	ARYRccRSQSRSRYYRQRQRSRRRRRRScQTRRRAMRccRPRYRPRcRRH	C5(Carbamidomethyl); C6(Carbamidomethyl); C29(Carbamidomethyl); C38(Carbamidomethyl); C39(Carbamidomethyl); C47(Carbamidomethyl)	2	51	[]	[]	[]	[]	96.7383	70.7	PS-008	0	P|001	7090.92	61.3199	P1	P1 +1(61)	+1(61)	P1	P|001 → P1 +1(61)
B	R04	B_R04	PS	607	322807	18.3003	0.10809	16.924	7090.63	61.0313	61.0313	Sperm protamine P1	P1	['P1']	ARYRCCRSQSRSRYYRQRQRSRRRRRRSCQTRRRAMRCCRPRYRPRCRRH	ARYRccRSQSRSRYYRQRQRSRRRRRRScQTRRRAMRccRPRYRPRcRRH	C5(Carbamidomethyl); C6(Carbamidomethyl); C29(Carbamidomethyl); C38(Carbamidomethyl); C39(Carbamidomethyl); C47(Carbamidomethyl)	2	51	[]	[]	[]	[]	76.032	43.78	PS-008	0	P|001	7090.92	61.3199	P1	P1 +1(61)	+1(61)	P1	P|001 → P1 +1(61)
B	R04	B_R04	PS	155	42030.2	15.3591	-1.04989	4.5826	7090.63	61.0333	61.0333	Sperm protamine P1	P1	['P1']	ARYRCCRSQSRSRYYRQRQRSRRRRRRSCQTRRRAMRCCRPRYRPRCRRH	ARYRccRSQSRSRYYRQRQRSRRRRRRScQTRRRAMRccRPRYRPRcRRH	C5(Carbamidomethyl); C6(Carbamidomethyl); C29(Carbamidomethyl); C38(Carbamidomethyl); C39(Carbamidomethyl); C47(Carbamidomethyl)	2	51	[]	[]	[]	[]	29.1846	38.11	PS-008	0	P|001	7090.92	61.3199	P1	P1 +1(61)	+1(61)	P1	P|001 → P1 +1(61)
B	R03	B_R03	TP	541	4378000000	32.0276	0.813286	15.5715	7090.63	61.0338	61.0338	P04553	P1	['P1']	ARYRCCRSQSRSRYYRQRQRSRRRRRRSCQTRRRAMRCCRPRYRPRCRRH	M.ARYR(C)[Carbamidomethylation](C)[Carbamidomethylation]RSQSRSRYYRQRQRSRRRRRRS(C)[Carbamidomethylation]QT(RRRA)[61.0338]MR(C)[Carbamidomethylation](C)[Carbamidomethylation]RPRYRPR(C)[Carbamidomethylation]RRH.		2	51	[]	[]	[]	[]		21.3152	TP-047	0	P|001	7090.92	61.3199	P1	P1 +1(61)	+1(61)	P1	P|001 → P1 +1(61)
A	R02	A_R02	TP	497	3803000000	31.8245	0.630367	14.5832	7090.63	61.0339	61.0339	P04553	P1	['P1']	ARYRCCRSQSRSRYYRQRQRSRRRRRRSCQTRRRAMRCCRPRYRPRCRRH	M.ARYR(C)[Carbamidomethylation](C)[Carbamidomethylation]RSQSRSRYYRQRQRSRRRRRRS(C)[Carbamidomethylation]QTRRRAMR(C)[Carbamidomethylation](C)[Carbamidomethylation]RPR(Y)[61.0239]RPR(C)[Carbamidomethylation]RRH.		2	51	[]	[]	[]	[]		22.8378	TP-047	0	P|001	7090.92	61.3199	P1	P1 +1(61)	+1(61)	P1	P|001 → P1 +1(61)
B	R04	B_R04	TP	567	2764000000	31.3641	0.0170419	15.9105	7090.63	61.034	61.034	P04553	P1	['P1']	ARYRCCRSQSRSRYYRQRQRSRRRRRRSCQTRRRAMRCCRPRYRPRCRRH	M.ARYR(C)[Carbamidomethylation](C)[Carbamidomethylation]RSQSRSRYYRQRQRSRRRRRRS(C)[Carbamidomethylation]QTRRRAMR(C)[Carbamidomethylation](C)[Carbamidomethylation]RPR(Y)[61.0340]RPR(C)[Carbamidomethylation]RRH.		2	51	[]	[]	[]	[]		22.1842	TP-047	0	P|001	7090.92	61.3199	P1	P1 +1(61)	+1(61)	P1	P|001 → P1 +1(61)
B	R03	B_R03	TP	481	4378000000	32.0276	0.813286	14.0768	7090.63	61.034	61.034	P04553	P1	['P1']	ARYRCCRSQSRSRYYRQRQRSRRRRRRSCQTRRRAMRCCRPRYRPRCRRH	M.ARYR(C)[Carbamidomethylation](C)[Carbamidomethylation]RSQSRSRYYRQRQRSRRRRRRS(C)[Carbamidomethylation]QTRRRAMR(C)[Carbamidomethylation]((C)[Carbamidomethylation])[61.0340]RPRYRPR(C)[Carbamidomethylation]RRH.		2	51	[]	[]	[]	[]		25.5005	TP-047	0	P|001	7090.92	61.3199	P1	P1 +1(61)	+1(61)	P1	P|001 → P1 +1(61)
B	R04	B_R04	TP	607	2764000000	31.3641	0.0170419	16.924	7090.63	61.0341	61.0341	P04553	P1	['P1']	ARYRCCRSQSRSRYYRQRQRSRRRRRRSCQTRRRAMRCCRPRYRPRCRRH	M.ARYR(C)[Carbamidomethylation](C)[Carbamidomethylation]RSQSRSRYYRQRQRSRRRRRRS(C)[Carbamidomethylation]QTRRRAMR(C)[Carbamidomethylation](C)[Carbamidomethylation]R(PR)[61.0341]YRPR(C)[Carbamidomethylation]RRH.		2	51	[]	[]	[]	[]		23.7863	TP-047	0	P|001	7090.92	61.3199	P1	P1 +1(61)	+1(61)	P1	P|001 → P1 +1(61)
B	R03	B_R03	TP	517	4378000000	32.0276	0.813286	14.9502	7090.63	61.0341	61.0341	P04553	P1	['P1']	ARYRCCRSQSRSRYYRQRQRSRRRRRRSCQTRRRAMRCCRPRYRPRCRRH	M.ARYR(C)[Carbamidomethylation](C)[Carbamidomethylation]RSQSRSRYYRQRQRSRRRRRRS(C)[Carbamidomethylation]QTRRRAMR(C)[Carbamidomethylation](C)[Carbamidomethylation]R(PRY)[61.0341]RPR(C)[Carbamidomethylation]RRH.		2	51	[]	[]	[]	[]		24.5003	TP-047	0	P|001	7090.92	61.3199	P1	P1 +1(61)	+1(61)	P1	P|001 → P1 +1(61)
A	R01	A_R01	PS	830	95020.2	16.5359	-0.256682	23.7439	7090.63	61.035	61.035	Sperm protamine P1	P1	['P1']	ARYRCCRSQSRSRYYRQRQRSRRRRRRSCQTRRRAMRCCRPRYRPRCRRH	ARYRccRSQSRSRYYRQRQRSRRRRRRScQTRRRAMRccRPRYRPRcRRH	C5(Carbamidomethyl); C6(Carbamidomethyl); C29(Carbamidomethyl); C38(Carbamidomethyl); C39(Carbamidomethyl); C47(Carbamidomethyl)	2	51	[]	[]	[]	[]	57.3309	75.51	PS-008	0	P|001	7090.92	61.3199	P1	P1 +1(61)	+1(61)	P1	P|001 → P1 +1(61)
A	R01	A_R01	PS	524	2.94635e+06	21.4905	2.06659	14.972	7090.63	61.0351	61.0351	Sperm protamine P1	P1	['P1']	ARYRCCRSQSRSRYYRQRQRSRRRRRRSCQTRRRAMRCCRPRYRPRCRRH	ARYRccRSQSRSRYYRQRQRSRRRRRRScQTRRRAMRccRPRYRPRcRRH	C5(Carbamidomethyl); C6(Carbamidomethyl); C29(Carbamidomethyl); C38(Carbamidomethyl); C39(Carbamidomethyl); C47(Carbamidomethyl)	2	51	[]	[]	[]	[]	82.1784	77.69	PS-008	0	P|001	7090.92	61.3199	P1	P1 +1(61)	+1(61)	P1	P|001 → P1 +1(61)
A	R01	A_R01	PS	708	140791	17.1032	0.00931117	20.175	7090.63	61.0351	61.0351	Sperm protamine P1	P1	['P1']	ARYRCCRSQSRSRYYRQRQRSRRRRRRSCQTRRRAMRCCRPRYRPRCRRH	ARYRccRSQSRSRYYRQRQRSRRRRRRScQTRRRAMRccRPRYRPRcRRH	C5(Carbamidomethyl); C6(Carbamidomethyl); C29(Carbamidomethyl); C38(Carbamidomethyl); C39(Carbamidomethyl); C47(Carbamidomethyl)	2	51	[]	[]	[]	[]	70.5761	76.38	PS-008	0	P|001	7090.92	61.3199	P1	P1 +1(61)	+1(61)	P1	P|001 → P1 +1(61)
B	R04	B_R04	TP	81	216600000	27.6905	-1.08534	2.37683	7090.63	61.0354	61.0354	P04553	P1	['P1']	ARYRCCRSQSRSRYYRQRQRSRRRRRRSCQTRRRAMRCCRPRYRPRCRRH	M.ARYR(C)[Carbamidomethylation](C)[Carbamidomethylation]RSQSRSRYYRQRQRSRRRRRRS(C)[Carbamidomethylation]QTR(RR)[61.0254]AMR(C)[Carbamidomethylation](C)[Carbamidomethylation]RPRYRPR(C)[Carbamidomethylation]RRH.		2	51	[]	[]	[]	[]		18.265	TP-047	0	P|001	7090.92	61.3199	P1	P1 +1(61)	+1(61)	P1	P|001 → P1 +1(61)
B	R04	B_R04	TP	255	216600000	27.6905	-1.08534	7.57983	7090.63	61.0356	61.0356	P04553	P1	['P1']	ARYRCCRSQSRSRYYRQRQRSRRRRRRSCQTRRRAMRCCRPRYRPRCRRH	M.ARYR(C)[Carbamidomethylation](C)[Carbamidomethylation]RSQSRSRYYRQRQRSRRRRRRS(C)[Carbamidomethylation]QTRRRA(MR(C)[Carbamidomethylation](C)[Carbamidomethylation]RPR)[61.0306]YRPR(C)[Carbamidomethylation]RRH.		2	51	[]	[]	[]	[]		18.8537	TP-047	0	P|001	7090.92	61.3199	P1	P1 +1(61)	+1(61)	P1	P|001 → P1 +1(61)
A	R01	A_R01	PS	832	28415.2	14.7944	-1.07333	23.8024	7090.63	61.0357	61.0357	Sperm protamine P1	P1	['P1']	ARYRCCRSQSRSRYYRQRQRSRRRRRRSCQTRRRAMRCCRPRYRPRCRRH	ARYRccRSQSRSRYYRQRQRSRRRRRRScQTRRRAMRccRPRYRPRcRRH	C5(Carbamidomethyl); C6(Carbamidomethyl); C29(Carbamidomethyl); C38(Carbamidomethyl); C39(Carbamidomethyl); C47(Carbamidomethyl)	2	51	[]	[]	[]	[]	97.5573	63.11	PS-008	0	P|001	7090.92	61.3199	P1	P1 +1(61)	+1(61)	P1	P|001 → P1 +1(61)
B	R04	B_R04	TP	215	216600000	27.6905	-1.08534	6.3785	7090.63	61.0359	61.0359	P04553	P1	['P1']	ARYRCCRSQSRSRYYRQRQRSRRRRRRSCQTRRRAMRCCRPRYRPRCRRH	M.ARYR(C)[Carbamidomethylation](C)[Carbamidomethylation]RSQSRSRYYRQRQRSRRRRRRS((C)[Carbamidomethylation])[61.0359]QTRRRAMR(C)[Carbamidomethylation](C)[Carbamidomethylation]RPRYRPR(C)[Carbamidomethylation]RRH.		2	51	[]	[]	[]	[]		18.4368	TP-047	0	P|001	7090.92	61.3199	P1	P1 +1(61)	+1(61)	P1	P|001 → P1 +1(61)
B	R04	B_R04	TP	115	216600000	27.6905	-1.08534	3.389	7090.63	61.036	61.036	P04553	P1	['P1']	ARYRCCRSQSRSRYYRQRQRSRRRRRRSCQTRRRAMRCCRPRYRPRCRRH	M.ARYR(C)[Carbamidomethylation](C)[Carbamidomethylation]RSQSRSRYYRQRQRSRRRRRRS(C)[Carbamidomethylation]QTRR(R)[61.0260]AMR(C)[Carbamidomethylation](C)[Carbamidomethylation]RPRYRPR(C)[Carbamidomethylation]RRH.		2	51	[]	[]	[]	[]		22.5193	TP-047	0	P|001	7090.92	61.3199	P1	P1 +1(61)	+1(61)	P1	P|001 → P1 +1(61)
B	R04	B_R04	TP	135	216600000	27.6905	-1.08534	3.987	7090.63	61.0362	61.0362	P04553	P1	['P1']	ARYRCCRSQSRSRYYRQRQRSRRRRRRSCQTRRRAMRCCRPRYRPRCRRH	M.ARYR(C)[Carbamidomethylation](C)[Carbamidomethylation]RSQSRSRYYRQRQRSRRRRRRS(C)[Carbamidomethylation]QTR(RRAM)[61.0312]R(C)[Carbamidomethylation](C)[Carbamidomethylation]RPRYRPR(C)[Carbamidomethylation]RRH.		2	51	[]	[]	[]	[]		21.329	TP-047	0	P|001	7090.92	61.3199	P1	P1 +1(61)	+1(61)	P1	P|001 → P1 +1(61)
A	R01	A_R01	TP	498	5951000000	32.4705	0.733082	14.364	7090.63	61.0364	61.0364	P04553	P1	['P1']	ARYRCCRSQSRSRYYRQRQRSRRRRRRSCQTRRRAMRCCRPRYRPRCRRH	M.ARYR(C)[Carbamidomethylation](C)[Carbamidomethylation]RSQSRSRYYRQRQRSRRRRRRS(C)[Carbamidomethylation]QTRRRA(M)[61.0313]R(C)[Carbamidomethylation](C)[Carbamidomethylation]RPRYRPR(C)[Carbamidomethylation]RRH.		2	51	[]	[]	[]	[]		23.6984	TP-047	0	P|001	7090.92	61.3199	P1	P1 +1(61)	+1(61)	P1	P|001 → P1 +1(61)
B	R04	B_R04	TP	235	216600000	27.6905	-1.08534	6.98017	7090.63	61.0364	61.0364	P04553	P1	['P1']	ARYRCCRSQSRSRYYRQRQRSRRRRRRSCQTRRRAMRCCRPRYRPRCRRH	M.ARYR(C)[Carbamidomethylation](C)[Carbamidomethylation]RSQSRSRYYRQRQRSRRRRRRS(C)[Carbamidomethylation]QTR(RRAM)[61.0314]R(C)[Carbamidomethylation](C)[Carbamidomethylation]RPRYRPR(C)[Carbamidomethylation]RRH.		2	51	[]	[]	[]	[]		19.8476	TP-047	0	P|001	7090.92	61.3199	P1	P1 +1(61)	+1(61)	P1	P|001 → P1 +1(61)
A	R01	A_R01	TP	722	5951000000	32.4705	0.733082	20.5852	7090.63	61.0364	61.0364	P04553	P1	['P1']	ARYRCCRSQSRSRYYRQRQRSRRRRRRSCQTRRRAMRCCRPRYRPRCRRH	M.ARYR(C)[Carbamidomethylation](C)[Carbamidomethylation]RSQSRSRYYRQRQRSRRRRRRS((C)[Carbamidomethylation])[61.0364]QTRRRAMR(C)[Carbamidomethylation](C)[Carbamidomethylation]RPRYRPR(C)[Carbamidomethylation]RRH.		2	51	[]	[]	[]	[]		20.0661	TP-047	0	P|001	7090.92	61.3199	P1	P1 +1(61)	+1(61)	P1	P|001 → P1 +1(61)
A	R02	A_R02	TP	523	3803000000	31.8245	0.630367	15.188	7090.63	61.037	61.037	P04553	P1	['P1']	ARYRCCRSQSRSRYYRQRQRSRRRRRRSCQTRRRAMRCCRPRYRPRCRRH	M.ARYR(C)[Carbamidomethylation](C)[Carbamidomethylation]RSQSRSRYYRQRQRSRRRRRRS(C)[Carbamidomethylation]QTRRRAMR(C)[Carbamidomethylation](C)[Carbamidomethylation]R(PRY)[61.0319]RPR(C)[Carbamidomethylation]RRH.		2	51	[]	[]	[]	[]		23.1388	TP-047	0	P|001	7090.92	61.3199	P1	P1 +1(61)	+1(61)	P1	P|001 → P1 +1(61)
B	R04	B_R04	PS	567	916614	19.806	0.700878	15.9105	7090.63	61.037	61.037	Sperm protamine P1	P1	['P1']	ARYRCCRSQSRSRYYRQRQRSRRRRRRSCQTRRRAMRCCRPRYRPRCRRH	ARYRccRSQSRSRYYRQRQRSRRRRRRScQTRRRAMRccRPRYRPRcRRH	C5(Carbamidomethyl); C6(Carbamidomethyl); C29(Carbamidomethyl); C38(Carbamidomethyl); C39(Carbamidomethyl); C47(Carbamidomethyl)	2	51	[]	[]	[]	[]	98.6226	59.63	PS-008	0	P|001	7090.92	61.3199	P1	P1 +1(61)	+1(61)	P1	P|001 → P1 +1(61)
B	R04	B_R04	TP	17	216600000	27.6905	-1.08534	0.478167	7090.63	61.0371	61.0371	P04553	P1	['P1']	ARYRCCRSQSRSRYYRQRQRSRRRRRRSCQTRRRAMRCCRPRYRPRCRRH	M.ARYR(C)[Carbamidomethylation](C)[Carbamidomethylation]RSQSRSRYYRQRQRSRRRRRRS(C)[Carbamidomethylation](QT)[61.0271]RRRAMR(C)[Carbamidomethylation](C)[Carbamidomethylation]RPRYRPR(C)[Carbamidomethylation]RRH.		2	51	[]	[]	[]	[]		21.8745	TP-047	0	P|001	7090.92	61.3199	P1	P1 +1(61)	+1(61)	P1	P|001 → P1 +1(61)
B	R04	B_R04	TP	155	216600000	27.6905	-1.08534	4.58267	7090.63	61.0377	61.0377	P04553	P1	['P1']	ARYRCCRSQSRSRYYRQRQRSRRRRRRSCQTRRRAMRCCRPRYRPRCRRH	M.ARYR(C)[Carbamidomethylation](C)[Carbamidomethylation]RSQSRSRYYRQRQRSRRRRRRS(C)[Carbamidomethylation]QTRRRAM(R(C)[Carbamidomethylation](C)[Carbamidomethylation]RPR)[61.0277]YRPR(C)[Carbamidomethylation]RRH.		2	51	[]	[]	[]	[]		18.3417	TP-047	0	P|001	7090.92	61.3199	P1	P1 +1(61)	+1(61)	P1	P|001 → P1 +1(61)
A	R02	A_R02	TP	781	3803000000	31.8245	0.630367	22.53	7090.63	61.0379	61.0379	P04553	P1	['P1']	ARYRCCRSQSRSRYYRQRQRSRRRRRRSCQTRRRAMRCCRPRYRPRCRRH	M.ARYR(C)[Carbamidomethylation](C)[Carbamidomethylation]RSQSRSRYYRQRQRSRRRRRRS((C)[Carbamidomethylation])[61.0379]QTRRRAMR(C)[Carbamidomethylation](C)[Carbamidomethylation]RPRYRPR(C)[Carbamidomethylation]RRH.		2	51	[]	[]	[]	[]		24.3341	TP-047	0	P|001	7090.92	61.3199	P1	P1 +1(61)	+1(61)	P1	P|001 → P1 +1(61)
B	R03	B_R03	TP	105	4378000000	32.0276	0.813286	3.1205	7090.63	61.038	61.038	P04553	P1	['P1']	ARYRCCRSQSRSRYYRQRQRSRRRRRRSCQTRRRAMRCCRPRYRPRCRRH	M.ARYR(C)[Carbamidomethylation](C)[Carbamidomethylation]RSQSRSRYYRQRQRSRRRRR(RS(C)[Carbamidomethylation])[61.0330]QTRRRAMR(C)[Carbamidomethylation](C)[Carbamidomethylation]RPRYRPR(C)[Carbamidomethylation]RRH.		2	51	[]	[]	[]	[]		16.1127	TP-047	0	P|001	7090.92	61.3199	P1	P1 +1(61)	+1(61)	P1	P|001 → P1 +1(61)
B	R03	B_R03	TP	145	4378000000	32.0276	0.813286	4.327	7090.63	61.0381	61.0381	P04553	P1	['P1']	ARYRCCRSQSRSRYYRQRQRSRRRRRRSCQTRRRAMRCCRPRYRPRCRRH	M.ARYR(C)[Carbamidomethylation](C)[Carbamidomethylation]RSQSRSRYYRQRQRSRRRRRR(S(C)[Carbamidomethylation])[61.0231]QTRRRAMR(C)[Carbamidomethylation](C)[Carbamidomethylation]RPRYRPR(C)[Carbamidomethylation]RRH.		2	51	[]	[]	[]	[]		15.8884	TP-047	0	P|001	7090.92	61.3199	P1	P1 +1(61)	+1(61)	P1	P|001 → P1 +1(61)
A	R01	A_R01	TP	500	5951000000	32.4705	0.733082	14.4107	7090.63	61.0383	61.0383	P04553	P1	['P1']	ARYRCCRSQSRSRYYRQRQRSRRRRRRSCQTRRRAMRCCRPRYRPRCRRH	M.ARYR(C)[Carbamidomethylation](C)[Carbamidomethylation]RSQSRSRYYRQRQRSRRR(R)[61.0283]RRS(C)[Carbamidomethylation]QTRRRAMR(C)[Carbamidomethylation](C)[Carbamidomethylation]RPRYRPR(C)[Carbamidomethylation]RRH.		2	51	[]	[]	[]	[]		25.5723	TP-047	0	P|001	7090.92	61.3199	P1	P1 +1(61)	+1(61)	P1	P|001 → P1 +1(61)
A	R02	A_R02	TP	827	3803000000	31.8245	0.630367	23.8742	7090.63	61.0384	61.0384	P04553	P1	['P1']	ARYRCCRSQSRSRYYRQRQRSRRRRRRSCQTRRRAMRCCRPRYRPRCRRH	M.ARYR(C)[Carbamidomethylation](C)[Carbamidomethylation]RSQSRSRYYRQRQRSR(R)[61.0284]RRRRS(C)[Carbamidomethylation]QTRRRAMR(C)[Carbamidomethylation](C)[Carbamidomethylation]RPRYRPR(C)[Carbamidomethylation]RRH.		2	51	[]	[]	[]	[]		20.0759	TP-047	0	P|001	7090.92	61.3199	P1	P1 +1(61)	+1(61)	P1	P|001 → P1 +1(61)
B	R03	B_R03	TP	487	4378000000	32.0276	0.813286	14.2368	7090.63	61.0386	61.0386	P04553	P1	['P1']	ARYRCCRSQSRSRYYRQRQRSRRRRRRSCQTRRRAMRCCRPRYRPRCRRH	M.ARYR(C)[Carbamidomethylation](C)[Carbamidomethylation]RSQSRSRYYRQRQRSRRR(R)[61.0286]RRS(C)[Carbamidomethylation]QTRRRAMR(C)[Carbamidomethylation](C)[Carbamidomethylation]RPRYRPR(C)[Carbamidomethylation]RRH.		2	51	[]	[]	[]	[]		23.8337	TP-047	0	P|001	7090.92	61.3199	P1	P1 +1(61)	+1(61)	P1	P|001 → P1 +1(61)
A	R01	A_R01	PS	598	158626	17.2753	0.0899982	16.9788	7090.63	61.0386	61.0386	Sperm protamine P1	P1	['P1']	ARYRCCRSQSRSRYYRQRQRSRRRRRRSCQTRRRAMRCCRPRYRPRCRRH	ARYRccRSQSRSRYYRQRQRSRRRRRRScQTRRRAMRccRPRYRPRcRRH	C5(Carbamidomethyl); C6(Carbamidomethyl); C29(Carbamidomethyl); C38(Carbamidomethyl); C39(Carbamidomethyl); C47(Carbamidomethyl)	2	51	[]	[]	[]	[]	61.1509	58.74	PS-008	0	P|001	7090.92	61.3199	P1	P1 +1(61)	+1(61)	P1	P|001 → P1 +1(61)
B	R03	B_R03	TP	62	4378000000	32.0276	0.813286	1.82417	7090.63	61.0387	61.0387	P04553	P1	['P1']	ARYRCCRSQSRSRYYRQRQRSRRRRRRSCQTRRRAMRCCRPRYRPRCRRH	M.ARYR(C)[Carbamidomethylation](C)[Carbamidomethylation]RSQSRSRYYRQRQR(S)[61.0287]RRRRRRS(C)[Carbamidomethylation]QTRRRAMR(C)[Carbamidomethylation](C)[Carbamidomethylation]RPRYRPR(C)[Carbamidomethylation]RRH.		2	51	[]	[]	[]	[]		17.0436	TP-047	0	P|001	7090.92	61.3199	P1	P1 +1(61)	+1(61)	P1	P|001 → P1 +1(61)
B	R03	B_R03	PS	571	144430	17.14	0.328143	16.4493	7090.63	61.0389	61.0389	Sperm protamine P1	P1	['P1']	ARYRCCRSQSRSRYYRQRQRSRRRRRRSCQTRRRAMRCCRPRYRPRCRRH	ARYRccRSQSRSRYYRQRQRSRRRRRRScQTRRRAMRccRPRYRPRcRRH	C5(Carbamidomethyl); C6(Carbamidomethyl); C29(Carbamidomethyl); C38(Carbamidomethyl); C39(Carbamidomethyl); C47(Carbamidomethyl)	2	51	[]	[]	[]	[]	50.6374	57.32	PS-008	0	P|001	7090.92	61.3199	P1	P1 +1(61)	+1(61)	P1	P|001 → P1 +1(61)
B	R04	B_R04	PS	219	43668.2	15.4143	-1.02817	6.4988	7090.63	61.0391	61.0391	Sperm protamine P1	P1	['P1']	ARYRCCRSQSRSRYYRQRQRSRRRRRRSCQTRRRAMRCCRPRYRPRCRRH	ARYRccRSQSRSRYYRQRQRSRRRRRRScQTRRRAMRccRPRYRPRcRRH	C5(Carbamidomethyl); C6(Carbamidomethyl); C29(Carbamidomethyl); C38(Carbamidomethyl); C39(Carbamidomethyl); C47(Carbamidomethyl)	2	51	[]	[]	[]	[]	87.2152	56.46	PS-008	0	P|001	7090.92	61.3199	P1	P1 +1(61)	+1(61)	P1	P|001 → P1 +1(61)
B	R03	B_R03	TP	170	4378000000	32.0276	0.813286	5.08167	7090.63	61.0392	61.0392	P04553	P1	['P1']	ARYRCCRSQSRSRYYRQRQRSRRRRRRSCQTRRRAMRCCRPRYRPRCRRH	M.ARYR(C)[Carbamidomethylation](C)[Carbamidomethylation]RSQSRSRYYRQRQRSRRR(RRRS(C)[Carbamidomethylation])[61.0392]QTRRRAMR(C)[Carbamidomethylation](C)[Carbamidomethylation]RPRYRPR(C)[Carbamidomethylation]RRH.		2	51	[]	[]	[]	[]		17.5867	TP-047	0	P|001	7090.92	61.3199	P1	P1 +1(61)	+1(61)	P1	P|001 → P1 +1(61)
A	R01	A_R01	TP	650	5951000000	32.4705	0.733082	18.4715	7090.63	61.0392	61.0392	P04553	P1	['P1']	ARYRCCRSQSRSRYYRQRQRSRRRRRRSCQTRRRAMRCCRPRYRPRCRRH	M.ARYR(C)[Carbamidomethylation](C)[Carbamidomethylation]RSQSRSRYYRQRQRSRRRRRRS((C)[Carbamidomethylation]Q)[61.0392]TRRRAMR(C)[Carbamidomethylation](C)[Carbamidomethylation]RPRYRPR(C)[Carbamidomethylation]RRH.		2	51	[]	[]	[]	[]		23.4319	TP-047	0	P|001	7090.92	61.3199	P1	P1 +1(61)	+1(61)	P1	P|001 → P1 +1(61)
A	R02	A_R02	TP	59	3803000000	31.8245	0.630367	1.74767	7090.64	61.0393	61.0393	P04553	P1	['P1']	ARYRCCRSQSRSRYYRQRQRSRRRRRRSCQTRRRAMRCCRPRYRPRCRRH	M.ARYR(C)[Carbamidomethylation](C)[Carbamidomethylation]RSQSRSRYYRQRQRSRRRRRRS(C)[Carbamidomethylation]QTRRR(A)[61.0293]MR(C)[Carbamidomethylation](C)[Carbamidomethylation]RPRYRPR(C)[Carbamidomethylation]RRH.		2	51	[]	[]	[]	[]		18.5096	TP-047	0	P|001	7090.92	61.3199	P1	P1 +1(61)	+1(61)	P1	P|001 → P1 +1(61)
B	R04	B_R04	PS	1167	33154.8	15.0169	-1.18462	32.999	7090.64	61.0394	61.0394	Sperm protamine P1	P1	['P1']	ARYRCCRSQSRSRYYRQRQRSRRRRRRSCQTRRRAMRCCRPRYRPRCRRH	ARYRccRSQSRSRYYRQRQRSRRRRRRScQTRRRAMRccRPRYRPRcRRH	C5(Carbamidomethyl); C6(Carbamidomethyl); C29(Carbamidomethyl); C38(Carbamidomethyl); C39(Carbamidomethyl); C47(Carbamidomethyl)	2	51	[]	[]	[]	[]	123.072	50.65	PS-008	0	P|001	7090.92	61.3199	P1	P1 +1(61)	+1(61)	P1	P|001 → P1 +1(61)
B	R04	B_R04	PS	61	42697.8	15.3819	-1.04093	1.782	7090.64	61.0395	61.0395	Sperm protamine P1	P1	['P1']	ARYRCCRSQSRSRYYRQRQRSRRRRRRSCQTRRRAMRCCRPRYRPRCRRH	ARYRccRSQSRSRYYRQRQRSRRRRRRScQTRRRAMRccRPRYRPRcRRH	C5(Carbamidomethyl); C6(Carbamidomethyl); C29(Carbamidomethyl); C38(Carbamidomethyl); C39(Carbamidomethyl); C47(Carbamidomethyl)	2	51	[]	[]	[]	[]	62.6876	60.79	PS-008	0	P|001	7090.92	61.3199	P1	P1 +1(61)	+1(61)	P1	P|001 → P1 +1(61)
A	R01	A_R01	TP	548	5951000000	32.4705	0.733082	15.5558	7090.64	61.0397	61.0397	P04553	P1	['P1']	ARYRCCRSQSRSRYYRQRQRSRRRRRRSCQTRRRAMRCCRPRYRPRCRRH	M.ARYR(C)[Carbamidomethylation](C)[Carbamidomethylation]RSQSRSRYYRQRQRSRRRRRRS(C)[Carbamidomethylation]QTRRR(AM)[61.0347]R(C)[Carbamidomethylation](C)[Carbamidomethylation]RPRYRPR(C)[Carbamidomethylation]RRH.		2	51	[]	[]	[]	[]		25.3503	TP-047	0	P|001	7090.92	61.3199	P1	P1 +1(61)	+1(61)	P1	P|001 → P1 +1(61)
A	R02	A_R02	TP	495	3803000000	31.8245	0.630367	14.5377	7090.64	61.0398	61.0398	P04553	P1	['P1']	ARYRCCRSQSRSRYYRQRQRSRRRRRRSCQTRRRAMRCCRPRYRPRCRRH	M.ARYR(C)[Carbamidomethylation](C)[Carbamidomethylation]RSQSRSRYYRQRQRSRRRRRR(S)[61.0347](C)[Carbamidomethylation]QTRRRAMR(C)[Carbamidomethylation](C)[Carbamidomethylation]RPRYRPR(C)[Carbamidomethylation]RRH.		2	51	[]	[]	[]	[]		24.1319	TP-047	0	P|001	7090.92	61.3199	P1	P1 +1(61)	+1(61)	P1	P|001 → P1 +1(61)
B	R04	B_R04	PS	59	63356.3	15.9512	-0.816784	1.7226	7090.64	61.0402	61.0402	Sperm protamine P1	P1	['P1']	ARYRCCRSQSRSRYYRQRQRSRRRRRRSCQTRRRAMRCCRPRYRPRCRRH	ARYRccRSQSRSRYYRQRQRSRRRRRRScQTRRRAMRccRPRYRPRcRRH	C5(Carbamidomethyl); C6(Carbamidomethyl); C29(Carbamidomethyl); C38(Carbamidomethyl); C39(Carbamidomethyl); C47(Carbamidomethyl)	2	51	[]	[]	[]	[]	85.3524	67.41	PS-008	0	P|001	7090.92	61.3199	P1	P1 +1(61)	+1(61)	P1	P|001 → P1 +1(61)
B	R04	B_R04	TP	59	216600000	27.6905	-1.08534	1.72267	7090.64	61.0408	61.0408	P04553	P1	['P1']	ARYRCCRSQSRSRYYRQRQRSRRRRRRSCQTRRRAMRCCRPRYRPRCRRH	M.ARYR(C)[Carbamidomethylation](C)[Carbamidomethylation]RSQSRSRYYRQRQRSRRRRRRS(C)[Carbamidomethylation](Q)[61.0308]TRRRAMR(C)[Carbamidomethylation](C)[Carbamidomethylation]RPRYRPR(C)[Carbamidomethylation]RRH.		2	51	[]	[]	[]	[]		22.0654	TP-047	0	P|001	7090.92	61.3199	P1	P1 +1(61)	+1(61)	P1	P|001 → P1 +1(61)
A	R01	A_R01	TP	748	5951000000	32.4705	0.733082	21.3465	7090.64	61.0408	61.0408	P04553	P1	['P1']	ARYRCCRSQSRSRYYRQRQRSRRRRRRSCQTRRRAMRCCRPRYRPRCRRH	M.ARYR(C)[Carbamidomethylation](C)[Carbamidomethylation]RSQSRSRYYRQRQRSRRRRRRS(C)[Carbamidomethylation]QTRRRAM(R(C)[Carbamidomethylation](C)[Carbamidomethylation])[61.0258]RPRYRPR(C)[Carbamidomethylation]RRH.		2	51	[]	[]	[]	[]		17.4009	TP-047	0	P|001	7090.92	61.3199	P1	P1 +1(61)	+1(61)	P1	P|001 → P1 +1(61)
B	R04	B_R04	TP	199	216600000	27.6905	-1.08534	5.89933	7090.64	61.0409	61.0409	P04553	P1	['P1']	ARYRCCRSQSRSRYYRQRQRSRRRRRRSCQTRRRAMRCCRPRYRPRCRRH	M.ARYR(C)[Carbamidomethylation](C)[Carbamidomethylation]RSQSRSRYYRQRQRSRRRRRRS(C)[Carbamidomethylation]QTRR(R)[61.0309]AMR(C)[Carbamidomethylation](C)[Carbamidomethylation]RPRYRPR(C)[Carbamidomethylation]RRH.		2	51	[]	[]	[]	[]		20.4266	TP-047	0	P|001	7090.92	61.3199	P1	P1 +1(61)	+1(61)	P1	P|001 → P1 +1(61)
A	R02	A_R02	TP	142	3803000000	31.8245	0.630367	4.261	7090.64	61.0411	61.0411	P04553	P1	['P1']	ARYRCCRSQSRSRYYRQRQRSRRRRRRSCQTRRRAMRCCRPRYRPRCRRH	M.ARYR(C)[Carbamidomethylation](C)[Carbamidomethylation]RSQSRSRYYRQRQRSRRRRRRS(C)[Carbamidomethylation]Q(T)[61.0260]RRRAMR(C)[Carbamidomethylation](C)[Carbamidomethylation]RPRYRPR(C)[Carbamidomethylation]RRH.		2	51	[]	[]	[]	[]		22.5181	TP-047	0	P|001	7090.92	61.3199	P1	P1 +1(61)	+1(61)	P1	P|001 → P1 +1(61)
A	R02	A_R02	TP	499	3803000000	31.8245	0.630367	14.6288	7090.64	61.0411	61.0411	P04553	P1	['P1']	ARYRCCRSQSRSRYYRQRQRSRRRRRRSCQTRRRAMRCCRPRYRPRCRRH	M.ARYR(C)[Carbamidomethylation](C)[Carbamidomethylation]RSQSRSRYYRQRQRSRRRRRRS(C)[Carbamidomethylation]Q(TRRR)[61.0261]AMR(C)[Carbamidomethylation](C)[Carbamidomethylation]RPRYRPR(C)[Carbamidomethylation]RRH.		2	51	[]	[]	[]	[]		21.7273	TP-047	0	P|001	7090.92	61.3199	P1	P1 +1(61)	+1(61)	P1	P|001 → P1 +1(61)
A	R02	A_R02	TP	79	3803000000	31.8245	0.630367	2.35383	7090.64	61.0412	61.0412	P04553	P1	['P1']	ARYRCCRSQSRSRYYRQRQRSRRRRRRSCQTRRRAMRCCRPRYRPRCRRH	M.ARYR(C)[Carbamidomethylation](C)[Carbamidomethylation]RSQSRSRYYRQRQRSRRRRRRS(C)[Carbamidomethylation]QTRRRAMR(C)[Carbamidomethylation](C)[Carbamidomethylation]R(PR)[61.0262]YRPR(C)[Carbamidomethylation]RRH.		2	51	[]	[]	[]	[]		18.8169	TP-047	0	P|001	7090.92	61.3199	P1	P1 +1(61)	+1(61)	P1	P|001 → P1 +1(61)
A	R02	A_R02	TP	100	3803000000	31.8245	0.630367	2.989	7090.64	61.0413	61.0413	P04553	P1	['P1']	ARYRCCRSQSRSRYYRQRQRSRRRRRRSCQTRRRAMRCCRPRYRPRCRRH	M.ARYR(C)[Carbamidomethylation](C)[Carbamidomethylation]RSQSRSRYYRQRQRSRRRRRR(S(C)[Carbamidomethylation])[61.0313]QTRRRAMR(C)[Carbamidomethylation](C)[Carbamidomethylation]RPRYRPR(C)[Carbamidomethylation]RRH.		2	51	[]	[]	[]	[]		19.6154	TP-047	0	P|001	7090.92	61.3199	P1	P1 +1(61)	+1(61)	P1	P|001 → P1 +1(61)
B	R04	B_R04	PS	195	35544.4	15.1173	-1.14509	5.7792	7090.64	61.0413	61.0413	Sperm protamine P1	P1	['P1']	ARYRCCRSQSRSRYYRQRQRSRRRRRRSCQTRRRAMRCCRPRYRPRCRRH	ARYRccRSQSRSRYYRQRQRSRRRRRRScQTRRRAMRccRPRYRPRcRRH	C5(Carbamidomethyl); C6(Carbamidomethyl); C29(Carbamidomethyl); C38(Carbamidomethyl); C39(Carbamidomethyl); C47(Carbamidomethyl)	2	51	[]	[]	[]	[]	74.0863	55.74	PS-008	0	P|001	7090.92	61.3199	P1	P1 +1(61)	+1(61)	P1	P|001 → P1 +1(61)
A	R02	A_R02	TP	120	3803000000	31.8245	0.630367	3.59517	7090.64	61.0413	61.0413	P04553	P1	['P1']	ARYRCCRSQSRSRYYRQRQRSRRRRRRSCQTRRRAMRCCRPRYRPRCRRH	M.ARYR(C)[Carbamidomethylation](C)[Carbamidomethylation]RSQSRSRYYRQRQRSRRRRRR(S)[61.0263](C)[Carbamidomethylation]QTRRRAMR(C)[Carbamidomethylation](C)[Carbamidomethylation]RPRYRPR(C)[Carbamidomethylation]RRH.		2	51	[]	[]	[]	[]		19.4797	TP-047	0	P|001	7090.92	61.3199	P1	P1 +1(61)	+1(61)	P1	P|001 → P1 +1(61)
A	R02	A_R02	TP	167	3803000000	31.8245	0.630367	5.01567	7090.64	61.0414	61.0414	P04553	P1	['P1']	ARYRCCRSQSRSRYYRQRQRSRRRRRRSCQTRRRAMRCCRPRYRPRCRRH	M.ARYR(C)[Carbamidomethylation](C)[Carbamidomethylation]RSQSRSRYYRQRQRSRRRR(RR)[61.0314]S(C)[Carbamidomethylation]QTRRRAMR(C)[Carbamidomethylation](C)[Carbamidomethylation]RPRYRPR(C)[Carbamidomethylation]RRH.		2	51	[]	[]	[]	[]		22.2605	TP-047	0	P|001	7090.92	61.3199	P1	P1 +1(61)	+1(61)	P1	P|001 → P1 +1(61)
A	R02	A_R02	TP	231	3803000000	31.8245	0.630367	6.95033	7090.64	61.0416	61.0416	P04553	P1	['P1']	ARYRCCRSQSRSRYYRQRQRSRRRRRRSCQTRRRAMRCCRPRYRPRCRRH	M.ARYR(C)[Carbamidomethylation](C)[Carbamidomethylation]RSQSRSRYYRQRQRSRRRRRR(S(C)[Carbamidomethylation])[61.0315]QTRRRAMR(C)[Carbamidomethylation](C)[Carbamidomethylation]RPRYRPR(C)[Carbamidomethylation]RRH.		2	51	[]	[]	[]	[]		19.242	TP-047	0	P|001	7090.92	61.3199	P1	P1 +1(61)	+1(61)	P1	P|001 → P1 +1(61)
A	R02	A_R02	TP	207	3803000000	31.8245	0.630367	6.22367	7090.64	61.0416	61.0416	P04553	P1	['P1']	ARYRCCRSQSRSRYYRQRQRSRRRRRRSCQTRRRAMRCCRPRYRPRCRRH	M.ARYR(C)[Carbamidomethylation](C)[Carbamidomethylation]RSQSRSRYYRQRQRSRRRRRRS((C)[Carbamidomethylation])[61.0316]QTRRRAMR(C)[Carbamidomethylation](C)[Carbamidomethylation]RPRYRPR(C)[Carbamidomethylation]RRH.		2	51	[]	[]	[]	[]		21.431	TP-047	0	P|001	7090.92	61.3199	P1	P1 +1(61)	+1(61)	P1	P|001 → P1 +1(61)
B	R04	B_R04	TP	219	216600000	27.6905	-1.08534	6.49883	7090.64	61.0418	61.0418	P04553	P1	['P1']	ARYRCCRSQSRSRYYRQRQRSRRRRRRSCQTRRRAMRCCRPRYRPRCRRH	M.ARYR(C)[Carbamidomethylation](C)[Carbamidomethylation]RSQSRSRYYRQRQRSRRRRRRS(C)[Carbamidomethylation]QTRRRA(M)[61.0268]R(C)[Carbamidomethylation](C)[Carbamidomethylation]RPRYRPR(C)[Carbamidomethylation]RRH.		2	51	[]	[]	[]	[]		20.0805	TP-047	0	P|001	7090.92	61.3199	P1	P1 +1(61)	+1(61)	P1	P|001 → P1 +1(61)
B	R04	B_R04	PS	129	13860.4	13.7587	-1.68	3.8076	7090.64	61.0419	61.0419	Sperm protamine P1	P1	['P1']	ARYRCCRSQSRSRYYRQRQRSRRRRRRSCQTRRRAMRCCRPRYRPRCRRH	ARYRccRSQSRSRYYRQRQRSRRRRRRScQTRRRAMRccRPRYRPRcRRH	C5(Carbamidomethyl); C6(Carbamidomethyl); C29(Carbamidomethyl); C38(Carbamidomethyl); C39(Carbamidomethyl); C47(Carbamidomethyl)	2	51	[]	[]	[]	[]	147.003	29.58	PS-008	0	P|001	7090.92	61.3199	P1	P1 +1(61)	+1(61)	P1	P|001 → P1 +1(61)
B	R04	B_R04	TP	79	216600000	27.6905	-1.08534	2.31717	7090.64	61.0421	61.0421	P04553	P1	['P1']	ARYRCCRSQSRSRYYRQRQRSRRRRRRSCQTRRRAMRCCRPRYRPRCRRH	M.ARYR(C)[Carbamidomethylation](C)[Carbamidomethylation]RSQSRSRYYRQRQRSRRRRRRS(C)[Carbamidomethylation]QT(RRR)[61.0321]AMR(C)[Carbamidomethylation](C)[Carbamidomethylation]RPRYRPR(C)[Carbamidomethylation]RRH.		2	51	[]	[]	[]	[]		20.0316	TP-047	0	P|001	7090.92	61.3199	P1	P1 +1(61)	+1(61)	P1	P|001 → P1 +1(61)
B	R04	B_R04	TP	39	216600000	27.6905	-1.08534	1.1285	7090.64	61.0422	61.0422	P04553	P1	['P1']	ARYRCCRSQSRSRYYRQRQRSRRRRRRSCQTRRRAMRCCRPRYRPRCRRH	M.ARYR(C)[Carbamidomethylation](C)[Carbamidomethylation]RSQSRSRYYRQRQRSRRRRRRS(C)[Carbamidomethylation]QTRRRAMR(C)[Carbamidomethylation](C)[Carbamidomethylation]R(PR)[61.0272]YRPR(C)[Carbamidomethylation]RRH.		2	51	[]	[]	[]	[]		20.859	TP-047	0	P|001	7090.92	61.3199	P1	P1 +1(61)	+1(61)	P1	P|001 → P1 +1(61)
B	R04	B_R04	TP	159	216600000	27.6905	-1.08534	4.70233	7090.64	61.0423	61.0423	P04553	P1	['P1']	ARYRCCRSQSRSRYYRQRQRSRRRRRRSCQTRRRAMRCCRPRYRPRCRRH	M.ARYR(C)[Carbamidomethylation](C)[Carbamidomethylation]RSQSRSRYYRQRQRSRRRRRRS((C)[Carbamidomethylation]QTR)[61.0323]RRAMR(C)[Carbamidomethylation](C)[Carbamidomethylation]RPRYRPR(C)[Carbamidomethylation]RRH.		2	51	[]	[]	[]	[]		19.2122	TP-047	0	P|001	7090.92	61.3199	P1	P1 +1(61)	+1(61)	P1	P|001 → P1 +1(61)
B	R04	B_R04	TP	119	216600000	27.6905	-1.08534	3.5085	7090.64	61.0427	61.0427	P04553	P1	['P1']	ARYRCCRSQSRSRYYRQRQRSRRRRRRSCQTRRRAMRCCRPRYRPRCRRH	M.ARYR(C)[Carbamidomethylation](C)[Carbamidomethylation]RSQSRSRYYRQRQRSRRRR(RRS(C)[Carbamidomethylation]QT)[61.0326]RRRAMR(C)[Carbamidomethylation](C)[Carbamidomethylation]RPRYRPR(C)[Carbamidomethylation]RRH.		2	51	[]	[]	[]	[]		19.2399	TP-047	0	P|001	7090.92	61.3199	P1	P1 +1(61)	+1(61)	P1	P|001 → P1 +1(61)
A	R02	A_R02	TP	543	3803000000	31.8245	0.630367	15.7152	7090.64	61.0427	61.0427	P04553	P1	['P1']	ARYRCCRSQSRSRYYRQRQRSRRRRRRSCQTRRRAMRCCRPRYRPRCRRH	M.ARYR(C)[Carbamidomethylation](C)[Carbamidomethylation]RSQSRSRYYRQRQRSRRRRRRS(C)[Carbamidomethylation]Q(TRR)[61.0327]RAMR(C)[Carbamidomethylation](C)[Carbamidomethylation]RPRYRPR(C)[Carbamidomethylation]RRH.		2	51	[]	[]	[]	[]		23.9989	TP-047	0	P|001	7090.92	61.3199	P1	P1 +1(61)	+1(61)	P1	P|001 → P1 +1(61)
B	R03	B_R03	PS	487	1.59832e+06	20.6081	1.67284	14.2369	7090.64	61.0429	61.0429	Sperm protamine P1	P1	['P1']	ARYRCCRSQSRSRYYRQRQRSRRRRRRSCQTRRRAMRCCRPRYRPRCRRH	ARYRccRSQSRSRYYRQRQRSRRRRRRScQTRRRAMRccRPRYRPRcRRH	C5(Carbamidomethyl); C6(Carbamidomethyl); C29(Carbamidomethyl); C38(Carbamidomethyl); C39(Carbamidomethyl); C47(Carbamidomethyl)	2	51	[]	[]	[]	[]	207.05	70.56	PS-008	0	P|001	7090.92	61.3199	P1	P1 +1(61)	+1(61)	P1	P|001 → P1 +1(61)
B	R03	B_R03	PS	529	1.13658e+06	20.1163	1.48213	15.2371	7090.64	61.0433	61.0433	Sperm protamine P1	P1	['P1']	ARYRCCRSQSRSRYYRQRQRSRRRRRRSCQTRRRAMRCCRPRYRPRCRRH	ARYRccRSQSRSRYYRQRQRSRRRRRRScQTRRRAMRccRPRYRPRcRRH	C5(Carbamidomethyl); C6(Carbamidomethyl); C29(Carbamidomethyl); C38(Carbamidomethyl); C39(Carbamidomethyl); C47(Carbamidomethyl)	2	51	[]	[]	[]	[]	93.1889	66.64	PS-008	0	P|001	7090.92	61.3199	P1	P1 +1(61)	+1(61)	P1	P|001 → P1 +1(61)
A	R02	A_R02	PS	187	25064.7	14.6134	-0.763483	5.6176	7090.64	61.044	61.044	Sperm protamine P1	P1	['P1']	ARYRCCRSQSRSRYYRQRQRSRRRRRRSCQTRRRAMRCCRPRYRPRCRRH	ARYRccRSQSRSRYYRQRQRSRRRRRRScQTRRRAMRccRPRYRPRcRRH	C5(Carbamidomethyl); C6(Carbamidomethyl); C29(Carbamidomethyl); C38(Carbamidomethyl); C39(Carbamidomethyl); C47(Carbamidomethyl)	2	51	[]	[]	[]	[]	57.9734	28.98	PS-008	0	P|001	7090.92	61.3199	P1	P1 +1(61)	+1(61)	P1	P|001 → P1 +1(61)
A	R02	A_R02	TP	75	3803000000	31.8245	0.630367	2.2325	7090.64	61.0464	61.0464	P04553	P1	['P1']	ARYRCCRSQSRSRYYRQRQRSRRRRRRSCQTRRRAMRCCRPRYRPRCRRH	M.ARYR(C)[Carbamidomethylation](C)[Carbamidomethylation]RSQSRSRYYRQRQRSRRRR(R)[61.0314]RS(C)[Carbamidomethylation]QTRRRAMR(C)[Carbamidomethylation](C)[Carbamidomethylation]RPRYRPR(C)[Carbamidomethylation]RRH.		2	51	[]	[]	[]	[]		20.0336	TP-047	0	P|001	7090.92	61.3199	P1	P1 +1(61)	+1(61)	P1	P|001 → P1 +1(61)
A	R02	A_R02	TP	116	3803000000	31.8245	0.630367	3.474	7090.64	61.0466	61.0466	P04553	P1	['P1']	ARYRCCRSQSRSRYYRQRQRSRRRRRRSCQTRRRAMRCCRPRYRPRCRRH	M.ARYR(C)[Carbamidomethylation](C)[Carbamidomethylation]RSQSRSRYYRQRQRSRRRRRRS((C)[Carbamidomethylation])[61.0266]QTRRRAMR(C)[Carbamidomethylation](C)[Carbamidomethylation]RPRYRPR(C)[Carbamidomethylation]RRH.		2	51	[]	[]	[]	[]		17.6217	TP-047	0	P|001	7090.92	61.3199	P1	P1 +1(61)	+1(61)	P1	P|001 → P1 +1(61)
A	R02	A_R02	TP	197	3803000000	31.8245	0.630367	5.92217	7090.64	61.0466	61.0466	P04553	P1	['P1']	ARYRCCRSQSRSRYYRQRQRSRRRRRRSCQTRRRAMRCCRPRYRPRCRRH	M.ARYR(C)[Carbamidomethylation](C)[Carbamidomethylation]RSQSRSRYYRQRQRSRRRRRRS(C)[Carbamidomethylation]QT(RRR)[61.0266]AMR(C)[Carbamidomethylation](C)[Carbamidomethylation]RPRYRPR(C)[Carbamidomethylation]RRH.		2	51	[]	[]	[]	[]		20.2763	TP-047	0	P|001	7090.92	61.3199	P1	P1 +1(61)	+1(61)	P1	P|001 → P1 +1(61)
B	R04	B_R04	PS	99	51153	15.6425	-0.938311	2.9122	7090.64	61.0466	61.0466	Sperm protamine P1	P1	['P1']	ARYRCCRSQSRSRYYRQRQRSRRRRRRSCQTRRRAMRCCRPRYRPRCRRH	ARYRccRSQSRSRYYRQRQRSRRRRRRScQTRRRAMRccRPRYRPRcRRH	C5(Carbamidomethyl); C6(Carbamidomethyl); C29(Carbamidomethyl); C38(Carbamidomethyl); C39(Carbamidomethyl); C47(Carbamidomethyl)	2	51	[]	[]	[]	[]	63.1368	60.31	PS-008	0	P|001	7090.92	61.3199	P1	P1 +1(61)	+1(61)	P1	P|001 → P1 +1(61)
A	R02	A_R02	TP	95	3803000000	31.8245	0.630367	2.8385	7090.64	61.0474	61.0474	P04553	P1	['P1']	ARYRCCRSQSRSRYYRQRQRSRRRRRRSCQTRRRAMRCCRPRYRPRCRRH	M.ARYR(C)[Carbamidomethylation](C)[Carbamidomethylation]RS(QSRSRYYRQRQRSRRR)[61.2574]RRRS(C)[Carbamidomethylation]QTRRRAMR(C)[Carbamidomethylation](C)[Carbamidomethylation]RPRYRPR(C)[Carbamidomethylation]RRH.		2	51	[]	[]	[]	[]		5.83794	TP-047	0	P|001	7090.92	61.3199	P1	P1 +1(61)	+1(61)	P1	P|001 → P1 +1(61)
A	R02	A_R02	TP	217	3803000000	31.8245	0.630367	6.52717	7090.64	61.0478	61.0478	P04553	P1	['P1']	ARYRCCRSQSRSRYYRQRQRSRRRRRRSCQTRRRAMRCCRPRYRPRCRRH	M.ARYR(C)[Carbamidomethylation](C)[Carbamidomethylation]RSQSRSRYYRQR(QRSRRRRRRS(C)[Carbamidomethylation]Q)[61.2578]TRRRAMR(C)[Carbamidomethylation](C)[Carbamidomethylation]RPRYRPR(C)[Carbamidomethylation]RRH.		2	51	[]	[]	[]	[]		5.37589	TP-047	0	P|001	7090.92	61.3199	P1	P1 +1(61)	+1(61)	P1	P|001 → P1 +1(61)
A	R02	A_R02	TP	176	3803000000	31.8245	0.630367	5.288	7090.65	61.0499	61.0499	P04553	P1	['P1']	ARYRCCRSQSRSRYYRQRQRSRRRRRRSCQTRRRAMRCCRPRYRPRCRRH	M.ARYR(C)[Carbamidomethylation](C)[Carbamidomethylation]RSQSRS(RYYRQRQRSRRRRRRS(C)[Carbamidomethylation]QTRR)[61.2599]RAMR(C)[Carbamidomethylation](C)[Carbamidomethylation]RPRYRPR(C)[Carbamidomethylation]RRH.		2	51	[]	[]	[]	[]		7.79832	TP-047	0	P|001	7090.92	61.3199	P1	P1 +1(61)	+1(61)	P1	P|001 → P1 +1(61)
A	R01	A_R01	TP	598	5951000000	32.4705	0.733082	16.9788	7090.65	61.0567	61.0567	P04553	P1	['P1']	ARYRCCRSQSRSRYYRQRQRSRRRRRRSCQTRRRAMRCCRPRYRPRCRRH	M.ARYR(C)[Carbamidomethylation](C)[Carbamidomethylation]RSQSRSRYYRQRQRSRRRRRRS(C)[Carbamidomethylation]QT(RRRAM)[61.0317]R(C)[Carbamidomethylation](C)[Carbamidomethylation]RPRYRPR(C)[Carbamidomethylation]RRH.		2	51	[]	[]	[]	[]		21.3326	TP-047	0	P|001	7090.92	61.3199	P1	P1 +1(61)	+1(61)	P1	P|001 → P1 +1(61)
B	R03	B_R03	TP	11	4378000000	32.0276	0.813286	0.301	7090.66	61.0624	61.0624	P04553	P1	['P1']	ARYRCCRSQSRSRYYRQRQRSRRRRRRSCQTRRRAMRCCRPRYRPRCRRH	M.ARYR(C)[Carbamidomethylation](C)[Carbamidomethylation]RSQSRSRYYRQRQRS(RRRRRR)[61.0374]S(C)[Carbamidomethylation]QTRRRAMR(C)[Carbamidomethylation](C)[Carbamidomethylation]RPRYRPR(C)[Carbamidomethylation]RRH.		2	51	[]	[]	[]	[]		16.6432	TP-047	0	P|001	7090.92	61.3199	P1	P1 +1(61)	+1(61)	P1	P|001 → P1 +1(61)
A	R02	A_R02	PS	543	352433	18.427	0.814077	15.7151	7090.66	61.0653	61.0653	Sperm protamine P1	P1	['P1']	ARYRCCRSQSRSRYYRQRQRSRRRRRRSCQTRRRAMRCCRPRYRPRCRRH	ARYRccRSQSRSRYYRQRQRSRRRRRRScQTRRRAMRccRPRYRPRcRRH	C5(Carbamidomethyl); C6(Carbamidomethyl); C29(Carbamidomethyl); C38(Carbamidomethyl); C39(Carbamidomethyl); C47(Carbamidomethyl)	2	51	[]	[]	[]	[]	133.145	68.9	PS-008	0	P|001	7090.92	61.3199	P1	P1 +1(61)	+1(61)	P1	P|001 → P1 +1(61)
A	R02	A_R02	PS	721	35191.8	15.103	-0.560958	20.7746	7090.66	61.0692	61.0692	Sperm protamine P1	P1	['P1']	ARYRCCRSQSRSRYYRQRQRSRRRRRRSCQTRRRAMRCCRPRYRPRCRRH	ARYRccRSQSRSRYYRQRQRSRRRRRRScQTRRRAMRccRPRYRPRcRRH	C5(Carbamidomethyl); C6(Carbamidomethyl); C29(Carbamidomethyl); C38(Carbamidomethyl); C39(Carbamidomethyl); C47(Carbamidomethyl)	2	51	[]	[]	[]	[]	115.272	56.44	PS-008	0	P|001	7090.92	61.3199	P1	P1 +1(61)	+1(61)	P1	P|001 → P1 +1(61)
A	R02	A_R02	PS	757	27470.1	14.7456	-0.708794	21.8296	7091.6	62.0031	62.0031	Sperm protamine P1	P1	['P1']	ARYRCCRSQSRSRYYRQRQRSRRRRRRSCQTRRRAMRCCRPRYRPRCRRH	ARYRccRSQSRSRYYRQRQRSRRRRRRScQTRRRAMRccRPRYRPRcRRH	C5(Carbamidomethyl); C6(Carbamidomethyl); C29(Carbamidomethyl); C38(Carbamidomethyl); C39(Carbamidomethyl); C47(Carbamidomethyl)	2	51	[]	[]	[]	[]	95.36	43.56	PS-008	0	P|001	7090.92	61.3199	P1	P1 +1(61)	+1(61)	P1	P|001 → P1 +1(61)
B	R04	B_R04	TP	829	2764000000	31.3641	0.0170419	23.1523	7091.61	62.0149	62.0149	P04553	P1	['P1']	ARYRCCRSQSRSRYYRQRQRSRRRRRRSCQTRRRAMRCCRPRYRPRCRRH	M.ARYR(C)[Carbamidomethylation](C)[Carbamidomethylation]RSQSR(S)[61.9399]RYYRQRQRSRRRRRRS(C)[Carbamidomethylation]QTRRRAMR(C)[Carbamidomethylation](C)[Carbamidomethylation]RPRYRPR(C)[Carbamidomethylation]RRH.		2	51	[]	[]	[]	[]		16.6805	TP-047	0	P|001	7090.92	61.3199	P1	P1 +1(61)	+1(61)	P1	P|001 → P1 +1(61)
A	R01	A_R01	PS	570	363821	18.4729	0.651573	16.1692	7091.63	62.033	62.033	Sperm protamine P1	P1	['P1']	ARYRCCRSQSRSRYYRQRQRSRRRRRRSCQTRRRAMRCCRPRYRPRCRRH	ARYRccRSQSRSRYYRQRQRSRRRRRRScQTRRRAMRccRPRYRPRcRRH	C5(Carbamidomethyl); C6(Carbamidomethyl); C29(Carbamidomethyl); C38(Carbamidomethyl); C39(Carbamidomethyl); C47(Carbamidomethyl)	2	51	[]	[]	[]	[]	109.921	56.01	PS-008	0	P|001	7090.92	61.3199	P1	P1 +1(61)	+1(61)	P1	P|001 → P1 +1(61)
B	R04	B_R04	TP	755	2764000000	31.3641	0.0170419	20.9708	7091.63	62.0367	62.0367	P04554	Unidentified	['pre-P2', 'HPI2', 'HPS1', 'HPS2', 'HP4', 'HP2', 'HP3']	YRRRHCSRRRLHRIHRRQHRSCRRRKRRSCRHRRRHRRGCRTRKRTCRRH	H.(Y)[-38.0556]RRRH(C)[Carbamidomethylation]SRRRLHRIHRRQHRS(C)[Carbamidomethylation]RRRKRRS(C)[Carbamidomethylation]RHRRRHRRG(C)[Carbamidomethylation]RTRKRT(C)[Carbamidomethylation]RRH.		53	102	[]	[]	[]	[]		19.2832	TP-061	0	P|001	7090.92	61.3199	P1	P1 +1(61)	+1(61)	P1	P|001 → P1 +1(61)
B	R03	B_R03	TP	505	4378000000	32.0276	0.813286	14.6728	7091.63	62.0374	62.0374	P04553	P1	['P1']	ARYRCCRSQSRSRYYRQRQRSRRRRRRSCQTRRRAMRCCRPRYRPRCRRH	M.ARYR(C)[Carbamidomethylation](C)[Carbamidomethylation]RSQSRSRYYRQRQRSRRRRRRS(C)[Carbamidomethylation]QTRRR(AM)[62.0324]R(C)[Carbamidomethylation](C)[Carbamidomethylation]RPRYRPR(C)[Carbamidomethylation]RRH.		2	51	[]	[]	[]	[]		18.026	TP-047	0	P|001	7090.92	61.3199	P1	P1 +1(61)	+1(61)	P1	P|001 → P1 +1(61)
A	R01	A_R01	TP	524	5951000000	32.4705	0.733082	14.972	7091.63	62.0374	62.0374	P04553	P1	['P1']	ARYRCCRSQSRSRYYRQRQRSRRRRRRSCQTRRRAMRCCRPRYRPRCRRH	M.ARYR(C)[Carbamidomethylation](C)[Carbamidomethylation]RSQSRSRYYRQRQRSRRRRRRS((C)[Carbamidomethylation]QTRRRAM)[62.0324]R(C)[Carbamidomethylation](C)[Carbamidomethylation]RPRYRPR(C)[Carbamidomethylation]RRH.		2	51	[]	[]	[]	[]		20.0884	TP-047	0	P|001	7090.92	61.3199	P1	P1 +1(61)	+1(61)	P1	P|001 → P1 +1(61)
B	R03	B_R03	TP	511	4378000000	32.0276	0.813286	14.8123	7091.63	62.0376	62.0376	P04553	P1	['P1']	ARYRCCRSQSRSRYYRQRQRSRRRRRRSCQTRRRAMRCCRPRYRPRCRRH	M.ARYR(C)[Carbamidomethylation](C)[Carbamidomethylation]RSQSRSRYYRQRQRSRRRRRRS(C)[Carbamidomethylation]QTRRRAMR(C)[Carbamidomethylation](C)[Carbamidomethylation]R(PR)[62.0326]YRPR(C)[Carbamidomethylation]RRH.		2	51	[]	[]	[]	[]		21.8999	TP-047	0	P|001	7090.92	61.3199	P1	P1 +1(61)	+1(61)	P1	P|001 → P1 +1(61)
B	R04	B_R04	TP	129	216600000	27.6905	-1.08534	3.80767	7091.63	62.0377	62.0377	P04553	P1	['P1']	ARYRCCRSQSRSRYYRQRQRSRRRRRRSCQTRRRAMRCCRPRYRPRCRRH	M.ARYR(C)[Carbamidomethylation](C)[Carbamidomethylation]RSQSRSRYYRQRQRSRRRRRR(S(C)[Carbamidomethylation]QTRRR)[62.0277]AMR(C)[Carbamidomethylation](C)[Carbamidomethylation]RPRYRPR(C)[Carbamidomethylation]RRH.		2	51	[]	[]	[]	[]		16.2781	TP-047	0	P|001	7090.92	61.3199	P1	P1 +1(61)	+1(61)	P1	P|001 → P1 +1(61)
A	R01	A_R01	TP	708	5951000000	32.4705	0.733082	20.175	7091.63	62.0378	62.0378	P04553	P1	['P1']	ARYRCCRSQSRSRYYRQRQRSRRRRRRSCQTRRRAMRCCRPRYRPRCRRH	M.ARYR(C)[Carbamidomethylation](C)[Carbamidomethylation]RSQSRSRYYRQRQRSRRRRRRS(C)[Carbamidomethylation]QTR(RR)[62.0377]AMR(C)[Carbamidomethylation](C)[Carbamidomethylation]RPRYRPR(C)[Carbamidomethylation]RRH.		2	51	[]	[]	[]	[]		21.8278	TP-047	0	P|001	7090.92	61.3199	P1	P1 +1(61)	+1(61)	P1	P|001 → P1 +1(61)
A	R01	A_R01	TP	832	5951000000	32.4705	0.733082	23.8023	7091.63	62.0379	62.0379	P04553	P1	['P1']	ARYRCCRSQSRSRYYRQRQRSRRRRRRSCQTRRRAMRCCRPRYRPRCRRH	M.ARYR(C)[Carbamidomethylation](C)[Carbamidomethylation]RSQSRSRYYRQRQRSRRRRRRS(C)[Carbamidomethylation]QT(R)[62.0429]RRAMR(C)[Carbamidomethylation](C)[Carbamidomethylation]RPRYRPR(C)[Carbamidomethylation]RRH.		2	51	[]	[]	[]	[]		18.9437	TP-047	0	P|001	7090.92	61.3199	P1	P1 +1(61)	+1(61)	P1	P|001 → P1 +1(61)
A	R01	A_R01	TP	774	5951000000	32.4705	0.733082	22.1067	7091.63	62.039	62.039	P04553	P1	['P1']	ARYRCCRSQSRSRYYRQRQRSRRRRRRSCQTRRRAMRCCRPRYRPRCRRH	M.ARYR(C)[Carbamidomethylation](C)[Carbamidomethylation]RSQSRSRYYRQRQRSRRRRRR(S(C)[Carbamidomethylation])[62.0340]QTRRRAMR(C)[Carbamidomethylation](C)[Carbamidomethylation]RPRYRPR(C)[Carbamidomethylation]RRH.		2	51	[]	[]	[]	[]		19.377	TP-047	0	P|001	7090.92	61.3199	P1	P1 +1(61)	+1(61)	P1	P|001 → P1 +1(61)
A	R01	A_R01	TP	864	5951000000	32.4705	0.733082	24.7388	7091.64	62.0396	62.0396	P04553	P1	['P1']	ARYRCCRSQSRSRYYRQRQRSRRRRRRSCQTRRRAMRCCRPRYRPRCRRH	M.ARYR(C)[Carbamidomethylation](C)[Carbamidomethylation]RSQSRSRYYRQRQRSRRRRR(RS(C)[Carbamidomethylation])[62.0396]QTRRRAMR(C)[Carbamidomethylation](C)[Carbamidomethylation]RPRYRPR(C)[Carbamidomethylation]RRH.		2	51	[]	[]	[]	[]		21.4544	TP-047	0	P|001	7090.92	61.3199	P1	P1 +1(61)	+1(61)	P1	P|001 → P1 +1(61)
B	R03	B_R03	TP	529	4378000000	32.0276	0.813286	15.2372	7091.64	62.0398	62.0398	P04553	P1	['P1']	ARYRCCRSQSRSRYYRQRQRSRRRRRRSCQTRRRAMRCCRPRYRPRCRRH	M.ARYR(C)[Carbamidomethylation](C)[Carbamidomethylation]RSQSRSRYYRQRQRSRRRRRRS(C)[Carbamidomethylation]QTRRRA(M)[62.0398]R(C)[Carbamidomethylation](C)[Carbamidomethylation]RPRYRPR(C)[Carbamidomethylation]RRH.		2	51	[]	[]	[]	[]		22.1707	TP-047	0	P|001	7090.92	61.3199	P1	P1 +1(61)	+1(61)	P1	P|001 → P1 +1(61)
A	R01	A_R01	TP	810	5951000000	32.4705	0.733082	23.1605	7091.64	62.0399	62.0399	P04553	P1	['P1']	ARYRCCRSQSRSRYYRQRQRSRRRRRRSCQTRRRAMRCCRPRYRPRCRRH	M.ARYR(C)[Carbamidomethylation](C)[Carbamidomethylation]RSQSRSRYYRQRQRSRRRRRRS(C)[Carbamidomethylation]QT(RRR)[62.0348]AMR(C)[Carbamidomethylation](C)[Carbamidomethylation]RPRYRPR(C)[Carbamidomethylation]RRH.		2	51	[]	[]	[]	[]		20.6945	TP-047	0	P|001	7090.92	61.3199	P1	P1 +1(61)	+1(61)	P1	P|001 → P1 +1(61)
B	R04	B_R04	TP	41	216600000	27.6905	-1.08534	1.18767	7091.64	62.0399	62.0399	P04553	P1	['P1']	ARYRCCRSQSRSRYYRQRQRSRRRRRRSCQTRRRAMRCCRPRYRPRCRRH	M.ARYR(C)[Carbamidomethylation](C)[Carbamidomethylation]RSQSRSRYYRQRQRSRRRRR(RS(C)[Carbamidomethylation]Q)[62.0298]TRRRAMR(C)[Carbamidomethylation](C)[Carbamidomethylation]RPRYRPR(C)[Carbamidomethylation]RRH.		2	51	[]	[]	[]	[]		16.7288	TP-047	0	P|001	7090.92	61.3199	P1	P1 +1(61)	+1(61)	P1	P|001 → P1 +1(61)
B	R04	B_R04	TP	99	216600000	27.6905	-1.08534	2.91217	7091.64	62.0399	62.0399	P04553	P1	['P1']	ARYRCCRSQSRSRYYRQRQRSRRRRRRSCQTRRRAMRCCRPRYRPRCRRH	M.ARYR(C)[Carbamidomethylation](C)[Carbamidomethylation]RSQSRSRYYRQRQRSRRRRRRS((C)[Carbamidomethylation]Q)[62.0299]TRRRAMR(C)[Carbamidomethylation](C)[Carbamidomethylation]RPRYRPR(C)[Carbamidomethylation]RRH.		2	51	[]	[]	[]	[]		17.8623	TP-047	0	P|001	7090.92	61.3199	P1	P1 +1(61)	+1(61)	P1	P|001 → P1 +1(61)
B	R04	B_R04	TP	19	216600000	27.6905	-1.08534	0.5375	7091.64	62.04	62.04	P04553	P1	['P1']	ARYRCCRSQSRSRYYRQRQRSRRRRRRSCQTRRRAMRCCRPRYRPRCRRH	M.ARYR(C)[Carbamidomethylation](C)[Carbamidomethylation]RSQSRSRYYRQRQRSRRRRR(RS(C)[Carbamidomethylation]QT)[62.0300]RRRAMR(C)[Carbamidomethylation](C)[Carbamidomethylation]RPRYRPR(C)[Carbamidomethylation]RRH.		2	51	[]	[]	[]	[]		17.2899	TP-047	0	P|001	7090.92	61.3199	P1	P1 +1(61)	+1(61)	P1	P|001 → P1 +1(61)
B	R04	B_R04	TP	175	216600000	27.6905	-1.08534	5.18117	7091.64	62.0405	62.0405	P04553	P1	['P1']	ARYRCCRSQSRSRYYRQRQRSRRRRRRSCQTRRRAMRCCRPRYRPRCRRH	M.ARYR(C)[Carbamidomethylation](C)[Carbamidomethylation]RSQSRSRYYRQRQRSRRRRRRS(C)[Carbamidomethylation](QTR)[62.0355]RRAMR(C)[Carbamidomethylation](C)[Carbamidomethylation]RPRYRPR(C)[Carbamidomethylation]RRH.		2	51	[]	[]	[]	[]		19.0312	TP-047	0	P|001	7090.92	61.3199	P1	P1 +1(61)	+1(61)	P1	P|001 → P1 +1(61)
B	R04	B_R04	TP	195	216600000	27.6905	-1.08534	5.77917	7091.64	62.0406	62.0406	P04553	P1	['P1']	ARYRCCRSQSRSRYYRQRQRSRRRRRRSCQTRRRAMRCCRPRYRPRCRRH	M.ARYR(C)[Carbamidomethylation](C)[Carbamidomethylation]RSQSRSRYYRQRQRSRRRRRRS(C)[Carbamidomethylation]QTRRR(AM)[62.0306]R(C)[Carbamidomethylation](C)[Carbamidomethylation]RPRYRPR(C)[Carbamidomethylation]RRH.		2	51	[]	[]	[]	[]		19.8212	TP-047	0	P|001	7090.92	61.3199	P1	P1 +1(61)	+1(61)	P1	P|001 → P1 +1(61)
B	R04	B_R04	TP	139	216600000	27.6905	-1.08534	4.10617	7091.64	62.0408	62.0408	P04553	P1	['P1']	ARYRCCRSQSRSRYYRQRQRSRRRRRRSCQTRRRAMRCCRPRYRPRCRRH	M.ARYR(C)[Carbamidomethylation](C)[Carbamidomethylation]RSQSRSRYYRQRQRSRRRRRRS(C)[Carbamidomethylation]QTR(RR)[62.0308]AMR(C)[Carbamidomethylation](C)[Carbamidomethylation]RPRYRPR(C)[Carbamidomethylation]RRH.		2	51	[]	[]	[]	[]		21.2138	TP-047	0	P|001	7090.92	61.3199	P1	P1 +1(61)	+1(61)	P1	P|001 → P1 +1(61)
B	R04	B_R04	TP	179	216600000	27.6905	-1.08534	5.30067	7091.64	62.041	62.041	P04553	P1	['P1']	ARYRCCRSQSRSRYYRQRQRSRRRRRRSCQTRRRAMRCCRPRYRPRCRRH	M.ARYR(C)[Carbamidomethylation](C)[Carbamidomethylation]RSQSRSRYYRQRQRSRRRRRRS(C)[Carbamidomethylation]Q(T)[62.0360]RRRAMR(C)[Carbamidomethylation](C)[Carbamidomethylation]RPRYRPR(C)[Carbamidomethylation]RRH.		2	51	[]	[]	[]	[]		19.4627	TP-047	0	P|001	7090.92	61.3199	P1	P1 +1(61)	+1(61)	P1	P|001 → P1 +1(61)
A	R02	A_R02	TP	801	3803000000	31.8245	0.630367	23.1178	7091.64	62.0424	62.0424	P04553	P1	['P1']	ARYRCCRSQSRSRYYRQRQRSRRRRRRSCQTRRRAMRCCRPRYRPRCRRH	M.ARYR(C)[Carbamidomethylation](C)[Carbamidomethylation]RSQSRSRYYRQRQRSRRRRRRS((C)[Carbamidomethylation])[62.0374]QTRRRAMR(C)[Carbamidomethylation](C)[Carbamidomethylation]RPRYRPR(C)[Carbamidomethylation]RRH.		2	51	[]	[]	[]	[]		20.8234	TP-047	0	P|001	7090.92	61.3199	P1	P1 +1(61)	+1(61)	P1	P|001 → P1 +1(61)
B	R03	B_R03	TP	92	4378000000	32.0276	0.813286	2.729	7091.64	62.0428	62.0428	P04553	P1	['P1']	ARYRCCRSQSRSRYYRQRQRSRRRRRRSCQTRRRAMRCCRPRYRPRCRRH	M.ARYR(C)[Carbamidomethylation](C)[Carbamidomethylation]RSQSR(SRYYR)[62.2528]QRQRSRRRRRRS(C)[Carbamidomethylation]QTRRRAMR(C)[Carbamidomethylation](C)[Carbamidomethylation]RPRYRPR(C)[Carbamidomethylation]RRH.		2	51	[]	[]	[]	[]		10.0932	TP-130	0	P|001	7090.92	61.3199	P1	P1 +1(61)	+1(61)	P1	P|001 → P1 +1(61)
A	R02	A_R02	TP	251	3803000000	31.8245	0.630367	7.559	7091.64	62.0433	62.0433	P04553	P1	['P1']	ARYRCCRSQSRSRYYRQRQRSRRRRRRSCQTRRRAMRCCRPRYRPRCRRH	M.ARYR(C)[Carbamidomethylation](C)[Carbamidomethylation]RSQSRSRYYRQRQRSRRRRRRS((C)[Carbamidomethylation])[62.0233]QTRRRAMR(C)[Carbamidomethylation](C)[Carbamidomethylation]RPRYRPR(C)[Carbamidomethylation]RRH.		2	51	[]	[]	[]	[]		16.5162	TP-047	0	P|001	7090.92	61.3199	P1	P1 +1(61)	+1(61)	P1	P|001 → P1 +1(61)
B	R03	B_R03	TP	199	4378000000	32.0276	0.813286	5.95633	7091.64	62.0436	62.0436	P04553	P1	['P1']	ARYRCCRSQSRSRYYRQRQRSRRRRRRSCQTRRRAMRCCRPRYRPRCRRH	M.ARYR(C)[Carbamidomethylation](C)[Carbamidomethylation]RSQ(SRSRYYRQRQRS)[62.2536]RRRRRRS(C)[Carbamidomethylation]QTRRRAMR(C)[Carbamidomethylation](C)[Carbamidomethylation]RPRYRPR(C)[Carbamidomethylation]RRH.		2	51	[]	[]	[]	[]		15.0763	TP-130	0	P|001	7090.92	61.3199	P1	P1 +1(61)	+1(61)	P1	P|001 → P1 +1(61)
B	R04	B_R04	TP	61	216600000	27.6905	-1.08534	1.782	7091.66	62.0604	62.0604	P04553	P1	['P1']	ARYRCCRSQSRSRYYRQRQRSRRRRRRSCQTRRRAMRCCRPRYRPRCRRH	M.ARYR(C)[Carbamidomethylation](C)[Carbamidomethylation]RSQSRSRYYRQRQRSRRRRRRS(C)[Carbamidomethylation]QTRRRA(M)[62.0304]R(C)[Carbamidomethylation](C)[Carbamidomethylation]RPRYRPR(C)[Carbamidomethylation]RRH.		2	51	[]	[]	[]	[]		21.0233	TP-047	0	P|001	7090.92	61.3199	P1	P1 +1(61)	+1(61)	P1	P|001 → P1 +1(61)
A	R01	A_R01	TP	688	5951000000	32.4705	0.733082	19.5898	7092.61	63.0126	63.0126	P04553	P1	['P1']	ARYRCCRSQSRSRYYRQRQRSRRRRRRSCQTRRRAMRCCRPRYRPRCRRH	M.ARYR(C)[Carbamidomethylation](C)[Carbamidomethylation]RSQSRSRYYRQRQRSRRRRRRS(C)[Carbamidomethylation]QTRRR(AM)[63.0426]R(C)[Carbamidomethylation](C)[Carbamidomethylation]RPRYRPR(C)[Carbamidomethylation]RRH.		2	51	[]	[]	[]	[]		18.3304	TP-130	0	P|001	7090.92	61.3199	P1	P1 +1(61)	+1(61)	P1	P|001 → P1 +1(61)
B	R04	B_R04	PS	755	44721.6	15.4487	-1.01463	20.9708	7092.62	63.0223	63.0223	Protamine-2	HP3	['pre-P2', 'HPI2', 'HPS1', 'HPS2', 'HP4', 'HP2', 'HP3']	GQSHYRRRHCSRRRLHRIHRRQHRSCRRRKRRSCRHRRRHRRGCRTRKRTCRRH	GQSHYRRRHcSRRRLHRIHRRQHRScRRRKRRScRHRRRHRRGcRTRKRTcRRH	C10(Carbamidomethyl); C26(Carbamidomethyl); C34(Carbamidomethyl); C44(Carbamidomethyl); C51(Carbamidomethyl)	49	102	[]	[]	[]	[]	1	30.32	PS-017	0	P|001	7090.92	61.3199	P1	P1 +1(61)	+1(61)	P1	P|001 → P1 +1(61)
A	R01	A_R01	TP	512	5951000000	32.4705	0.733082	14.6988	7092.62	63.0247	63.0247	P04553	P1	['P1']	ARYRCCRSQSRSRYYRQRQRSRRRRRRSCQTRRRAMRCCRPRYRPRCRRH	M.ARYR(C)[Carbamidomethylation](C)[Carbamidomethylation]RSQSRSRYYRQRQRSRRRRRRS(C)[Carbamidomethylation]QTRRRAMR(C)[Carbamidomethylation](C)[Carbamidomethylation]RPR(Y)[63.2347]RPR(C)[Carbamidomethylation]RRH.		2	51	[]	[]	[]	[]		14.5016	TP-130	0	P|001	7090.92	61.3199	P1	P1 +1(61)	+1(61)	P1	P|001 → P1 +1(61)
B	R03	B_R03	PS	517	321724	18.2955	0.77615	14.9502	7092.63	63.0298	63.0298	Sperm protamine P1	P1	['P1']	ARYRCCRSQSRSRYYRQRQRSRRRRRRSCQTRRRAMRCCRPRYRPRCRRH	ARYRccRSQSRSRYYRQRQRSRRRRRRScQTRRRAMRccRPRYRPRcRRH	C5(Carbamidomethyl); C6(Carbamidomethyl); C29(Carbamidomethyl); C38(Carbamidomethyl); C39(Carbamidomethyl); C47(Carbamidomethyl)	2	51	[]	[]	[]	[]	145.659	57.44	PS-008	0	P|001	7090.92	61.3199	P1	P1 +1(61)	+1(61)	P1	P|001 → P1 +1(61)
A	R01	A_R01	PS	688	65147.4	15.9914	-0.51202	19.5899	7092.63	63.0324	63.0324	Sperm protamine P1	P1	['P1']	ARYRCCRSQSRSRYYRQRQRSRRRRRRSCQTRRRAMRCCRPRYRPRCRRH	ARYRccRSQSRSRYYRQRQRSRRRRRRScQTRRRAMRccRPRYRPRcRRH	C5(Carbamidomethyl); C6(Carbamidomethyl); C29(Carbamidomethyl); C38(Carbamidomethyl); C39(Carbamidomethyl); C47(Carbamidomethyl)	2	51	[]	[]	[]	[]	89.236	59.93	PS-008	0	P|001	7090.92	61.3199	P1	P1 +1(61)	+1(61)	P1	P|001 → P1 +1(61)
B	R04	B_R04	TP	549	2764000000	31.3641	0.0170419	15.4988	7092.63	63.036	63.036	P04553	P1	['P1']	ARYRCCRSQSRSRYYRQRQRSRRRRRRSCQTRRRAMRCCRPRYRPRCRRH	M.ARYR(C)[Carbamidomethylation](C)[Carbamidomethylation]RSQSRSRYYRQRQRSRRRRRRS(C)[Carbamidomethylation]QTRRR(AM)[63.0460]R(C)[Carbamidomethylation](C)[Carbamidomethylation]RPRYRPR(C)[Carbamidomethylation]RRH.		2	51	[]	[]	[]	[]		17.5442	TP-130	0	P|001	7090.92	61.3199	P1	P1 +1(61)	+1(61)	P1	P|001 → P1 +1(61)
B	R04	B_R04	PS	115	6655.69	12.7004	-2.09667	3.389	7092.63	63.037	63.037	Sperm protamine P1	P1	['P1']	ARYRCCRSQSRSRYYRQRQRSRRRRRRSCQTRRRAMRCCRPRYRPRCRRH	ARYRccRSQSRSRYYRQRQRSRRRRRRScQTRRRAMRccRPRYRPRcRRH	C5(Carbamidomethyl); C6(Carbamidomethyl); C29(Carbamidomethyl); C38(Carbamidomethyl); C39(Carbamidomethyl); C47(Carbamidomethyl)	2	51	[]	[]	[]	[]	123.143	44	PS-008	0	P|001	7090.92	61.3199	P1	P1 +1(61)	+1(61)	P1	P|001 → P1 +1(61)
A	R01	A_R01	TP	570	5951000000	32.4705	0.733082	16.1692	7092.63	63.0374	63.0374	P04553	P1	['P1']	ARYRCCRSQSRSRYYRQRQRSRRRRRRSCQTRRRAMRCCRPRYRPRCRRH	M.ARYR(C)[Carbamidomethylation](C)[Carbamidomethylation]RSQSRSRYYRQRQRSRRRRRRS(C)[Carbamidomethylation]QTR(RRAM)[63.0474]R(C)[Carbamidomethylation](C)[Carbamidomethylation]RPRYRPR(C)[Carbamidomethylation]RRH.		2	51	[]	[]	[]	[]		16.8837	TP-130	0	P|001	7090.92	61.3199	P1	P1 +1(61)	+1(61)	P1	P|001 → P1 +1(61)
A	R01	A_R01	TP	728	5951000000	32.4705	0.733082	20.7625	7092.64	63.0394	63.0394	P04553	P1	['P1']	ARYRCCRSQSRSRYYRQRQRSRRRRRRSCQTRRRAMRCCRPRYRPRCRRH	M.ARYR(C)[Carbamidomethylation](C)[Carbamidomethylation]RSQSRSRYYRQRQRSRRRRR(RS(C)[Carbamidomethylation]QTRRR)[63.0394]AMR(C)[Carbamidomethylation](C)[Carbamidomethylation]RPRYRPR(C)[Carbamidomethylation]RRH.		2	51	[]	[]	[]	[]		19.3775	TP-130	0	P|001	7090.92	61.3199	P1	P1 +1(61)	+1(61)	P1	P|001 → P1 +1(61)
A	R02	A_R02	TP	763	3803000000	31.8245	0.630367	22.0048	7092.64	63.041	63.041	P04553	P1	['P1']	ARYRCCRSQSRSRYYRQRQRSRRRRRRSCQTRRRAMRCCRPRYRPRCRRH	M.ARYR(C)[Carbamidomethylation](C)[Carbamidomethylation]RSQSRSRYYRQRQRSRRRRRRS((C)[Carbamidomethylation]QTRRR)[63.0360]AMR(C)[Carbamidomethylation](C)[Carbamidomethylation]RPRYRPR(C)[Carbamidomethylation]RRH.		2	51	[]	[]	[]	[]		21.9993	TP-130	0	P|001	7090.92	61.3199	P1	P1 +1(61)	+1(61)	P1	P|001 → P1 +1(61)
A	R02	A_R02	TP	795	3803000000	31.8245	0.630367	22.9433	7092.64	63.0412	63.0412	P04553	P1	['P1']	ARYRCCRSQSRSRYYRQRQRSRRRRRRSCQTRRRAMRCCRPRYRPRCRRH	M.ARYR(C)[Carbamidomethylation](C)[Carbamidomethylation]RSQ(SRS)[63.2512]RYYRQRQRSRRRRRRS(C)[Carbamidomethylation]QTRRRAMR(C)[Carbamidomethylation](C)[Carbamidomethylation]RPRYRPR(C)[Carbamidomethylation]RRH.		2	51	[]	[]	[]	[]		16.1081	TP-130	0	P|001	7090.92	61.3199	P1	P1 +1(61)	+1(61)	P1	P|001 → P1 +1(61)
B	R03	B_R03	TP	571	4378000000	32.0276	0.813286	16.4493	7092.64	63.0439	63.0439	P04553	P1	['P1']	ARYRCCRSQSRSRYYRQRQRSRRRRRRSCQTRRRAMRCCRPRYRPRCRRH	M.ARYR(C)[Carbamidomethylation](C)[Carbamidomethylation]RSQSRSRYYRQRQRSRRRRRRS((C)[Carbamidomethylation])[63.0439]QTRRRAMR(C)[Carbamidomethylation](C)[Carbamidomethylation]RPRYRPR(C)[Carbamidomethylation]RRH.		2	51	[]	[]	[]	[]		22.7575	TP-130	0	P|001	7090.92	61.3199	P1	P1 +1(61)	+1(61)	P1	P|001 → P1 +1(61)
B	R03	B_R03	PS	52	2484.05	11.2785	-1.94456	1.5227	7093.61	64.0161	64.0161	Sperm protamine P1	P1	['P1']	ARYRCCRSQSRSRYYRQRQRSRRRRRRSCQTRRRAMRCCRPRYRPRCRRH	ARYRccRSQsRSRYYRQRQRSRRRRRRScQTRRRAMRccRPRYRPRcRRH	C5(Carbamidomethyl); C6(Carbamidomethyl); S10(O-phospho-L-serine); C29(Carbamidomethyl); C38(Carbamidomethyl); C39(Carbamidomethyl); C47(Carbamidomethyl)	2	51	['S']	[10]	[11]	[]	97.1151	12	PS-075	1	P|001	7090.92	61.3199	P1	P1 +1(61)	+1(61)	P1	P|001 → P1 +1(61)
B	R03	B_R03	PS	216	1960	10.9366	-2.07711	6.4695	7093.62	64.0237	64.0237	Sperm protamine P1	P1	['P1']	ARYRCCRSQSRSRYYRQRQRSRRRRRRSCQTRRRAMRCCRPRYRPRCRRH	ARYRccRSQsRSRYYRQRQRSRRRRRRScQTRRRAMRccRPRYRPRcRRH	C5(Carbamidomethyl); C6(Carbamidomethyl); S10(O-phospho-L-serine); C29(Carbamidomethyl); C38(Carbamidomethyl); C39(Carbamidomethyl); C47(Carbamidomethyl)	2	51	['S']	[10]	[11]	[]	113.884	6.75	PS-075	1	P|001	7090.92	61.3199	P1	P1 +1(61)	+1(61)	P1	P|001 → P1 +1(61)
B	R04	B_R04	PS	755	27793	14.7624	-1.28482	20.9708	7093.62	64.0246	64.0246	Protamine-2	HP3	['pre-P2', 'HPI2', 'HPS1', 'HPS2', 'HP4', 'HP2', 'HP3']	GQSHYRRRHCSRRRLHRIHRRQHRSCRRRKRRSCRHRRRHRRGCRTRKRTCRRH	GQSHYRRRHcSRRRLHRIHRRQHRScRRRKRRScRHRRRHRRGcRTRKRTcRRH	C10(Carbamidomethyl); C26(Carbamidomethyl); C34(Carbamidomethyl); C44(Carbamidomethyl); C51(Carbamidomethyl)	49	102	[]	[]	[]	[]	1	30.32	PS-017	0	P|001	7090.92	61.3199	P1	P1 +1(61)	+1(61)	P1	P|001 → P1 +1(61)
B	R03	B_R03	PS	505	1.02337e+06	19.9649	1.42344	14.6728	7093.62	64.0253	64.0253	Sperm protamine P1	P1	['P1']	ARYRCCRSQSRSRYYRQRQRSRRRRRRSCQTRRRAMRCCRPRYRPRCRRH	ARYRccRSQSRSRYYRQRQRSRRRRRRScQTRRRAMRccRPRYRPRcRRH	C5(Carbamidomethyl); C6(Carbamidomethyl); C29(Carbamidomethyl); C38(Carbamidomethyl); C39(Carbamidomethyl); C47(Carbamidomethyl)	2	51	[]	[]	[]	[]	117.54	58.85	PS-008	0	P|001	7090.92	61.3199	P1	P1 +1(61)	+1(61)	P1	P|001 → P1 +1(61)
B	R04	B_R04	PS	79	10910.7	13.4135	-1.81592	2.3171	7093.62	64.0291	64.0291	Sperm protamine P1	P1	['P1']	ARYRCCRSQSRSRYYRQRQRSRRRRRRSCQTRRRAMRCCRPRYRPRCRRH	ARYRccRSQSRSRYYRQRQRSRRRRRRScQTRRRAMRccRPRYRPRcRRH	C5(Carbamidomethyl); C6(Carbamidomethyl); C29(Carbamidomethyl); C38(Carbamidomethyl); C39(Carbamidomethyl); C47(Carbamidomethyl)	2	51	[]	[]	[]	[]	178.699	51.02	PS-008	0	P|001	7090.92	61.3199	P1	P1 +1(61)	+1(61)	P1	P|001 → P1 +1(61)
B	R03	B_R03	PS	13	2654.48	11.3742	-1.90744	0.3607	7093.63	64.0293	64.0293	Sperm protamine P1	P1	['P1']	ARYRCCRSQSRSRYYRQRQRSRRRRRRSCQTRRRAMRCCRPRYRPRCRRH	ARYRccRSQsRSRYYRQRQRSRRRRRRScQTRRRAMRccRPRYRPRcRRH	C5(Carbamidomethyl); C6(Carbamidomethyl); S10(O-phospho-L-serine); C29(Carbamidomethyl); C38(Carbamidomethyl); C39(Carbamidomethyl); C47(Carbamidomethyl)	2	51	['S']	[10]	[11]	[]	11.1128	7.67	PS-075	1	P|001	7090.92	61.3199	P1	P1 +1(61)	+1(61)	P1	P|001 → P1 +1(61)
B	R03	B_R03	PS	174	1940.49	10.9222	-2.0827	5.2027	7093.63	64.0304	64.0304	Sperm protamine P1	P1	['P1']	ARYRCCRSQSRSRYYRQRQRSRRRRRRSCQTRRRAMRCCRPRYRPRCRRH	ARYRccRSQsRSRYYRQRQRSRRRRRRScQTRRRAMRccRPRYRPRcRRH	C5(Carbamidomethyl); C6(Carbamidomethyl); S10(O-phospho-L-serine); C29(Carbamidomethyl); C38(Carbamidomethyl); C39(Carbamidomethyl); C47(Carbamidomethyl)	2	51	['S']	[10]	[11]	[]	87.634	13.59	PS-075	1	P|001	7090.92	61.3199	P1	P1 +1(61)	+1(61)	P1	P|001 → P1 +1(61)
A	R02	A_R02	PS	251	3234.77	11.6594	-1.98541	7.5591	7093.63	64.0307	64.0307	Sperm protamine P1	P1	['P1']	ARYRCCRSQSRSRYYRQRQRSRRRRRRSCQTRRRAMRCCRPRYRPRCRRH	ARYRccRSQSRSRYYRQRQRSRRRRRRScQTRRRAMRccRPRYRPRcRRH	C5(Carbamidomethyl); C6(Carbamidomethyl); C29(Carbamidomethyl); C38(Carbamidomethyl); C39(Carbamidomethyl); C47(Carbamidomethyl)	2	51	[]	[]	[]	[]	199.228	30.33	PS-008	0	P|001	7090.92	61.3199	P1	P1 +1(61)	+1(61)	P1	P|001 → P1 +1(61)
A	R02	A_R02	PS	55	2231.43	11.1238	-2.20701	1.6263	7093.63	64.0308	64.0308	Sperm protamine P1	P1	['P1']	ARYRCCRSQSRSRYYRQRQRSRRRRRRSCQTRRRAMRCCRPRYRPRCRRH	ARYRccRSQsRSRYYRQRQRSRRRRRRScQTRRRAMRccRPRYRPRcRRH	C5(Carbamidomethyl); C6(Carbamidomethyl); S10(O-phospho-L-serine); C29(Carbamidomethyl); C38(Carbamidomethyl); C39(Carbamidomethyl); C47(Carbamidomethyl)	2	51	['S']	[10]	[11]	[]	159.902	7.67	PS-075	1	P|001	7090.92	61.3199	P1	P1 +1(61)	+1(61)	P1	P|001 → P1 +1(61)
B	R03	B_R03	PS	154	2990.99	11.5464	-1.84068	4.5978	7093.63	64.0309	64.0309	Sperm protamine P1	P1	['P1']	ARYRCCRSQSRSRYYRQRQRSRRRRRRSCQTRRRAMRCCRPRYRPRCRRH	ARYRccRSQsRSRYYRQRQRSRRRRRRScQTRRRAMRccRPRYRPRcRRH	C5(Carbamidomethyl); C6(Carbamidomethyl); S10(O-phospho-L-serine); C29(Carbamidomethyl); C38(Carbamidomethyl); C39(Carbamidomethyl); C47(Carbamidomethyl)	2	51	['S']	[10]	[11]	[]	77.8921	20.99	PS-075	1	P|001	7090.92	61.3199	P1	P1 +1(61)	+1(61)	P1	P|001 → P1 +1(61)
A	R02	A_R02	PS	176	3600.99	11.8142	-1.92141	5.288	7093.63	64.0321	64.0321	Sperm protamine P1	P1	['P1']	ARYRCCRSQSRSRYYRQRQRSRRRRRRSCQTRRRAMRCCRPRYRPRCRRH	ARYRccRSQsRSRYYRQRQRSRRRRRRScQTRRRAMRccRPRyRPRcRRH	C5(Carbamidomethyl); C6(Carbamidomethyl); S10(O-phospho-L-serine); C29(Carbamidomethyl); C38(Carbamidomethyl); C39(Carbamidomethyl); Y43(O4'-phospho-L-tyrosine); C47(Carbamidomethyl)	2	51	['S', 'Y']	[10, 43]	[11, 44]	[]	1.03291	2.45	PS-051	2	P|001	7090.92	61.3199	P1	P1 +1(61)	+1(61)	P1	P|001 → P1 +1(61)
B	R03	B_R03	PS	72	5569.06	12.4432	-1.49296	2.1255	7093.63	64.0337	64.0337	Sperm protamine P1	P1	['P1']	ARYRCCRSQSRSRYYRQRQRSRRRRRRSCQTRRRAMRCCRPRYRPRCRRH	ARYRccRSQsRSRYYRQRQRSRRRRRRScQTRRRAMRccRPRYRPRcRRH	C5(Carbamidomethyl); C6(Carbamidomethyl); S10(O-phospho-L-serine); C29(Carbamidomethyl); C38(Carbamidomethyl); C39(Carbamidomethyl); C47(Carbamidomethyl)	2	51	['S']	[10]	[11]	[]	77.8921	21	PS-075	1	P|001	7090.92	61.3199	P1	P1 +1(61)	+1(61)	P1	P|001 → P1 +1(61)
A	R02	A_R02	PS	136	3886.8	11.9244	-1.87583	4.0796	7093.63	64.0339	64.0339	Sperm protamine P1	P1	['P1']	ARYRCCRSQSRSRYYRQRQRSRRRRRRSCQTRRRAMRCCRPRYRPRCRRH	ARYRccRSQsRSRYYRQRQRSRRRRRRScQTRRRAMRccRPRYRPRcRRH	C5(Carbamidomethyl); C6(Carbamidomethyl); S10(O-phospho-L-serine); C29(Carbamidomethyl); C38(Carbamidomethyl); C39(Carbamidomethyl); C47(Carbamidomethyl)	2	51	['S']	[10]	[11]	[]	145.859	9.46	PS-075	1	P|001	7090.92	61.3199	P1	P1 +1(61)	+1(61)	P1	P|001 → P1 +1(61)
B	R03	B_R03	PS	235	1548.22	10.5964	-2.20903	7.0399	7093.63	64.0346	64.0346	Sperm protamine P1	P1	['P1']	ARYRCCRSQSRSRYYRQRQRSRRRRRRSCQTRRRAMRCCRPRYRPRCRRH	ARYRccRSQsRSRYYRQRQRSRRRRRRScQTRRRAMRccRPRYRPRcRRH	C5(Carbamidomethyl); C6(Carbamidomethyl); S10(O-phospho-L-serine); C29(Carbamidomethyl); C38(Carbamidomethyl); C39(Carbamidomethyl); C47(Carbamidomethyl)	2	51	['S']	[10]	[11]	[]	135.297	11.31	PS-075	1	P|001	7090.92	61.3199	P1	P1 +1(61)	+1(61)	P1	P|001 → P1 +1(61)
A	R02	A_R02	PS	116	4433.91	12.1144	-1.79723	3.474	7093.63	64.0367	64.0367	Sperm protamine P1	P1	['P1']	ARYRCCRSQSRSRYYRQRQRSRRRRRRSCQTRRRAMRCCRPRYRPRCRRH	ARYRccRSQSRSRYYRQRQRSRRRRRRScQTRRRAMRccRPRYRPRcRRH	C5(Carbamidomethyl); C6(Carbamidomethyl); C29(Carbamidomethyl); C38(Carbamidomethyl); C39(Carbamidomethyl); C47(Carbamidomethyl)	2	51	[]	[]	[]	[]	151.537	31.45	PS-008	0	P|001	7090.92	61.3199	P1	P1 +1(61)	+1(61)	P1	P|001 → P1 +1(61)
A	R02	A_R02	PS	237	4405.16	12.105	-1.80111	7.1336	7093.63	64.0382	64.0382	Sperm protamine P1	P1	['P1']	ARYRCCRSQSRSRYYRQRQRSRRRRRRSCQTRRRAMRCCRPRYRPRCRRH	ARYRccRSQsRSRYYRQRQRSRRRRRRScQTRRRAMRccRPRYRPRcRRH	C5(Carbamidomethyl); C6(Carbamidomethyl); S10(O-phospho-L-serine); C29(Carbamidomethyl); C38(Carbamidomethyl); C39(Carbamidomethyl); C47(Carbamidomethyl)	2	51	['S']	[10]	[11]	[]	231.381	8.41	PS-075	1	P|001	7090.92	61.3199	P1	P1 +1(61)	+1(61)	P1	P|001 → P1 +1(61)
B	R03	B_R03	PS	92	5637.62	12.4609	-1.48611	2.7291	7093.64	64.0413	64.0413	Sperm protamine P1	P1	['P1']	ARYRCCRSQSRSRYYRQRQRSRRRRRRSCQTRRRAMRCCRPRYRPRCRRH	ARYRccRSQsRSRYYRQRQRSRRRRRRScQTRRRAMRccRPRYRPRcRRH	C5(Carbamidomethyl); C6(Carbamidomethyl); S10(O-phospho-L-serine); C29(Carbamidomethyl); C38(Carbamidomethyl); C39(Carbamidomethyl); C47(Carbamidomethyl)	2	51	['S']	[10]	[11]	[]	66.6289	18.12	PS-075	1	P|001	7090.92	61.3199	P1	P1 +1(61)	+1(61)	P1	P|001 → P1 +1(61)
A	R02	A_R02	PS	157	3117.47	11.6062	-2.00746	4.7123	7093.64	64.0447	64.0447	Sperm protamine P1	P1	['P1']	ARYRCCRSQSRSRYYRQRQRSRRRRRRSCQTRRRAMRCCRPRYRPRCRRH	ARYRccRsQSRSRYYRQRQRSRRRRRRScQTRRRAMRccRPRYRPRcRRH	C5(Carbamidomethyl); C6(Carbamidomethyl); S8(O-phospho-L-serine); C29(Carbamidomethyl); C38(Carbamidomethyl); C39(Carbamidomethyl); C47(Carbamidomethyl)	2	51	['S']	[8]	[9]	[]	4.0103	7.67	PS-037	1	P|001	7090.92	61.3199	P1	P1 +1(61)	+1(61)	P1	P|001 → P1 +1(61)
A	R02	A_R02	PS	1193	48824.2	15.5753	-0.365562	34.5156	7093.66	64.0604	64.0604	Sperm protamine P1	P1	['P1']	ARYRCCRSQSRSRYYRQRQRSRRRRRRSCQTRRRAMRCCRPRYRPRCRRH	ARYRccRSQSRSRYYRQRQRSRRRRRRScQTRRRAMRccRPRYRPRcRRH	C5(Carbamidomethyl); C6(Carbamidomethyl); C29(Carbamidomethyl); C38(Carbamidomethyl); C39(Carbamidomethyl); C47(Carbamidomethyl)	2	51	[]	[]	[]	[]	80.107	18.53	PS-008	0	P|001	7090.92	61.3199	P1	P1 +1(61)	+1(61)	P1	P|001 → P1 +1(61)
B	R03	B_R03	PS	216	4303.89	12.0714	-1.63711	6.4695	7094.61	65.0106	65.0106	Sperm protamine P1	P1	['P1']	ARYRCCRSQSRSRYYRQRQRSRRRRRRSCQTRRRAMRCCRPRYRPRCRRH	ARYRccRSQsRSRYYRQRQRSRRRRRRScQTRRRAMRccRPRYRPRcRRH	C5(Carbamidomethyl); C6(Carbamidomethyl); S10(O-phospho-L-serine); C29(Carbamidomethyl); C38(Carbamidomethyl); C39(Carbamidomethyl); C47(Carbamidomethyl)	2	51	['S']	[10]	[11]	[]	113.9	6.75	PS-075	1	P|001	7090.92	61.3199	P1	P1 +1(61)	+1(61)	P1	P|001 → P1 +1(61)
B	R03	B_R03	PS	52	3243.44	11.6633	-1.79535	1.5227	7094.61	65.0147	65.0147	Sperm protamine P1	P1	['P1']	ARYRCCRSQSRSRYYRQRQRSRRRRRRSCQTRRRAMRCCRPRYRPRCRRH	ARYRccRSQsRSRYYRQRQRSRRRRRRScQTRRRAMRccRPRYRPRcRRH	C5(Carbamidomethyl); C6(Carbamidomethyl); S10(O-phospho-L-serine); C29(Carbamidomethyl); C38(Carbamidomethyl); C39(Carbamidomethyl); C47(Carbamidomethyl)	2	51	['S']	[10]	[11]	[]	97.1151	10.06	PS-075	1	P|001	7090.92	61.3199	P1	P1 +1(61)	+1(61)	P1	P|001 → P1 +1(61)
B	R04	B_R04	PS	159	9142.91	13.1584	-1.91633	4.7024	7094.62	65.0251	65.0251	Sperm protamine P1	P1	['P1']	ARYRCCRSQSRSRYYRQRQRSRRRRRRSCQTRRRAMRCCRPRYRPRCRRH	ARYRccRSQSRSRYYRQRQRSRRRRRRScQTRRRAMRccRPRYRPRcRRH	C5(Carbamidomethyl); C6(Carbamidomethyl); C29(Carbamidomethyl); C38(Carbamidomethyl); C39(Carbamidomethyl); C47(Carbamidomethyl)	2	51	[]	[]	[]	[]	87.623	36.63	PS-008	0	P|001	7090.92	61.3199	P1	P1 +1(61)	+1(61)	P1	P|001 → P1 +1(61)
A	R02	A_R02	PS	521	121890	16.8952	0.18044	15.1363	7094.62	65.027	65.027	Sperm protamine P1	P1	['P1']	ARYRCCRSQSRSRYYRQRQRSRRRRRRSCQTRRRAMRCCRPRYRPRCRRH	ARYRccRSQSRSRYYRQRQRSRRRRRRScQTRRRAMRccRPRYRPRcRRH	C5(Carbamidomethyl); C6(Carbamidomethyl); C29(Carbamidomethyl); C38(Carbamidomethyl); C39(Carbamidomethyl); C47(Carbamidomethyl)	2	51	[]	[]	[]	[]	125.623	55.95	PS-008	0	P|001	7090.92	61.3199	P1	P1 +1(61)	+1(61)	P1	P|001 → P1 +1(61)
B	R03	B_R03	PS	13	4398.38	12.1028	-1.62496	0.3607	7094.62	65.0277	65.0277	Sperm protamine P1	P1	['P1']	ARYRCCRSQSRSRYYRQRQRSRRRRRRSCQTRRRAMRCCRPRYRPRCRRH	ARYRccRSQsRSRYYRQRQRSRRRRRRScQTRRRAMRccRPRYRPRcRRH	C5(Carbamidomethyl); C6(Carbamidomethyl); S10(O-phospho-L-serine); C29(Carbamidomethyl); C38(Carbamidomethyl); C39(Carbamidomethyl); C47(Carbamidomethyl)	2	51	['S']	[10]	[11]	[]	11.4619	7.67	PS-075	1	P|001	7090.92	61.3199	P1	P1 +1(61)	+1(61)	P1	P|001 → P1 +1(61)
B	R04	B_R04	PS	81	4505.6	12.1375	-2.31828	2.3769	7094.62	65.0283	65.0283	Sperm protamine P1	P1	['P1']	ARYRCCRSQSRSRYYRQRQRSRRRRRRSCQTRRRAMRCCRPRYRPRCRRH	ARYRccRSQSRSRYYRQRQRSRRRRRRScQTRRRAMRccRPRYRPRcRRH	C5(Carbamidomethyl); C6(Carbamidomethyl); C29(Carbamidomethyl); C38(Carbamidomethyl); C39(Carbamidomethyl); C47(Carbamidomethyl)	2	51	[]	[]	[]	[]	115.079	47.91	PS-008	0	P|001	7090.92	61.3199	P1	P1 +1(61)	+1(61)	P1	P|001 → P1 +1(61)
B	R04	B_R04	PS	179	7907.76	12.9491	-1.99877	5.3007	7094.62	65.0286	65.0286	Sperm protamine P1	P1	['P1']	ARYRCCRSQSRSRYYRQRQRSRRRRRRSCQTRRRAMRCCRPRYRPRCRRH	ARYRccRSQSRSRYYRQRQRSRRRRRRScQTRRRAMRccRPRYRPRcRRH	C5(Carbamidomethyl); C6(Carbamidomethyl); C29(Carbamidomethyl); C38(Carbamidomethyl); C39(Carbamidomethyl); C47(Carbamidomethyl)	2	51	[]	[]	[]	[]	132.061	44.33	PS-008	0	P|001	7090.92	61.3199	P1	P1 +1(61)	+1(61)	P1	P|001 → P1 +1(61)
A	R02	A_R02	PS	55	5348.87	12.385	-1.68527	1.6263	7094.62	65.0286	65.0286	Sperm protamine P1	P1	['P1']	ARYRCCRSQSRSRYYRQRQRSRRRRRRSCQTRRRAMRCCRPRYRPRCRRH	ARYRccRSQsRSRYYRQRQRSRRRRRRScQTRRRAMRccRPRYRPRcRRH	C5(Carbamidomethyl); C6(Carbamidomethyl); S10(O-phospho-L-serine); C29(Carbamidomethyl); C38(Carbamidomethyl); C39(Carbamidomethyl); C47(Carbamidomethyl)	2	51	['S']	[10]	[11]	[]	159.8	7.67	PS-075	1	P|001	7090.92	61.3199	P1	P1 +1(61)	+1(61)	P1	P|001 → P1 +1(61)
B	R04	B_R04	PS	119	5761.66	12.4923	-2.17861	3.5086	7094.63	65.0298	65.0298	Sperm protamine P1	P1	['P1']	ARYRCCRSQSRSRYYRQRQRSRRRRRRSCQTRRRAMRCCRPRYRPRCRRH	ARYRccRSQSRSRYYRQRQRSRRRRRRScQTRRRAMRccRPRYRPRcRRH	C5(Carbamidomethyl); C6(Carbamidomethyl); C29(Carbamidomethyl); C38(Carbamidomethyl); C39(Carbamidomethyl); C47(Carbamidomethyl)	2	51	[]	[]	[]	[]	132.599	40.68	PS-008	0	P|001	7090.92	61.3199	P1	P1 +1(61)	+1(61)	P1	P|001 → P1 +1(61)
B	R03	B_R03	PS	174	5415.48	12.4029	-1.5086	5.2027	7094.63	65.0299	65.0299	Sperm protamine P1	P1	['P1']	ARYRCCRSQSRSRYYRQRQRSRRRRRRSCQTRRRAMRCCRPRYRPRCRRH	ARYRccRSQsRSRYYRQRQRSRRRRRRScQTRRRAMRccRPRYRPRcRRH	C5(Carbamidomethyl); C6(Carbamidomethyl); S10(O-phospho-L-serine); C29(Carbamidomethyl); C38(Carbamidomethyl); C39(Carbamidomethyl); C47(Carbamidomethyl)	2	51	['S']	[10]	[11]	[]	87.6924	13.59	PS-075	1	P|001	7090.92	61.3199	P1	P1 +1(61)	+1(61)	P1	P|001 → P1 +1(61)
B	R04	B_R04	PS	139	4916.94	12.2635	-2.26866	4.1062	7094.63	65.034	65.034	Sperm protamine P1	P1	['P1']	ARYRCCRSQSRSRYYRQRQRSRRRRRRSCQTRRRAMRCCRPRYRPRCRRH	ARYRccRSQSRSRYYRQRQRSRRRRRRScQTRRRAMRccRPRYRPRcRRH	C5(Carbamidomethyl); C6(Carbamidomethyl); C29(Carbamidomethyl); C38(Carbamidomethyl); C39(Carbamidomethyl); C47(Carbamidomethyl)	2	51	[]	[]	[]	[]	88.0715	44	PS-008	0	P|001	7090.92	61.3199	P1	P1 +1(61)	+1(61)	P1	P|001 → P1 +1(61)
A	R02	A_R02	PS	95	3995.1	11.964	-1.85942	2.8385	7094.63	65.0349	65.0349	Sperm protamine P1	P1	['P1']	ARYRCCRSQSRSRYYRQRQRSRRRRRRSCQTRRRAMRCCRPRYRPRCRRH	ARYRccRsQSRSRYYRQRQRSRRRRRRScQTRRRAMRccRPRYRPRcRRH	C5(Carbamidomethyl); C6(Carbamidomethyl); S8(O-phospho-L-serine); C29(Carbamidomethyl); C38(Carbamidomethyl); C39(Carbamidomethyl); C47(Carbamidomethyl)	2	51	['S']	[8]	[9]	[]	4.0103	7.45	PS-037	1	P|001	7090.92	61.3199	P1	P1 +1(61)	+1(61)	P1	P|001 → P1 +1(61)
B	R03	B_R03	PS	255	3995.28	11.9641	-1.67873	7.6435	7094.63	65.0354	65.0354	Sperm protamine P1	P1	['P1']	ARYRCCRSQSRSRYYRQRQRSRRRRRRSCQTRRRAMRCCRPRYRPRCRRH	ARYRccRSQsRSRYYRQRQRSRRRRRRScQTRRRAMRccRPRYRPRcRRH	C5(Carbamidomethyl); C6(Carbamidomethyl); S10(O-phospho-L-serine); C29(Carbamidomethyl); C38(Carbamidomethyl); C39(Carbamidomethyl); C47(Carbamidomethyl)	2	51	['S']	[10]	[11]	[]	7.17645	13.03	PS-075	1	P|001	7090.92	61.3199	P1	P1 +1(61)	+1(61)	P1	P|001 → P1 +1(61)
A	R02	A_R02	PS	217	2329	11.1855	-2.18147	6.5272	7094.63	65.0386	65.0386	Sperm protamine P1	P1	['P1']	ARYRCCRSQSRSRYYRQRQRSRRRRRRSCQTRRRAMRCCRPRYRPRCRRH	ARYRccRSQsRSRYYRQRQRSRRRRRRScQTRRRAMRccRPRYRPRcRRH	C5(Carbamidomethyl); C6(Carbamidomethyl); S10(O-phospho-L-serine); C29(Carbamidomethyl); C38(Carbamidomethyl); C39(Carbamidomethyl); C47(Carbamidomethyl)	2	51	['S']	[10]	[11]	[]	175.755	9.97	PS-075	1	P|001	7090.92	61.3199	P1	P1 +1(61)	+1(61)	P1	P|001 → P1 +1(61)
B	R03	B_R03	PS	235	3345.75	11.7081	-1.77798	7.0399	7094.64	65.0393	65.0393	Sperm protamine P1	P1	['P1']	ARYRCCRSQSRSRYYRQRQRSRRRRRRSCQTRRRAMRCCRPRYRPRCRRH	ARYRccRSQsRSRYYRQRQRSRRRRRRScQTRRRAMRccRPRYRPRcRRH	C5(Carbamidomethyl); C6(Carbamidomethyl); S10(O-phospho-L-serine); C29(Carbamidomethyl); C38(Carbamidomethyl); C39(Carbamidomethyl); C47(Carbamidomethyl)	2	51	['S']	[10]	[11]	[]	135.297	11.31	PS-075	1	P|001	7090.92	61.3199	P1	P1 +1(61)	+1(61)	P1	P|001 → P1 +1(61)
A	R02	A_R02	PS	120	4246.29	12.052	-1.82303	3.5952	7094.64	65.0425	65.0425	Sperm protamine P1	P1	['P1']	ARYRCCRSQSRSRYYRQRQRSRRRRRRSCQTRRRAMRCCRPRYRPRCRRH	ARYRccRSQSRSRYYRQRQRSRRRRRRScQTRRRAMRccRPRYRPRcRRH	C5(Carbamidomethyl); C6(Carbamidomethyl); C29(Carbamidomethyl); C38(Carbamidomethyl); C39(Carbamidomethyl); C47(Carbamidomethyl)	2	51	[]	[]	[]	[]	101.154	40.24	PS-008	0	P|001	7090.92	61.3199	P1	P1 +1(61)	+1(61)	P1	P|001 → P1 +1(61)
B	R03	B_R03	PS	195	2343.91	11.1947	-1.97705	5.8358	7094.64	65.043	65.043	Sperm protamine P1	P1	['P1']	ARYRCCRSQSRSRYYRQRQRSRRRRRRSCQTRRRAMRCCRPRYRPRCRRH	ARYRccRSQsRSRYYRQRQRSRRRRRRScQTRRRAMRccRPRYRPRcRRH	C5(Carbamidomethyl); C6(Carbamidomethyl); S10(O-phospho-L-serine); C29(Carbamidomethyl); C38(Carbamidomethyl); C39(Carbamidomethyl); C47(Carbamidomethyl)	2	51	['S']	[10]	[11]	[]	84.5784	15.36	PS-075	1	P|001	7090.92	61.3199	P1	P1 +1(61)	+1(61)	P1	P|001 → P1 +1(61)
B	R04	B_R04	PS	41	5125.29	12.3234	-2.24509	1.1876	7094.64	65.0435	65.0435	Sperm protamine P1	P1	['P1']	ARYRCCRSQSRSRYYRQRQRSRRRRRRSCQTRRRAMRCCRPRYRPRCRRH	ARYRccRSQSRSRYYRQRQRSRRRRRRScQTRRRAMRccRPRYRPRcRRH	C5(Carbamidomethyl); C6(Carbamidomethyl); C29(Carbamidomethyl); C38(Carbamidomethyl); C39(Carbamidomethyl); C47(Carbamidomethyl)	2	51	[]	[]	[]	[]	95.7306	34.25	PS-008	0	P|001	7090.92	61.3199	P1	P1 +1(61)	+1(61)	P1	P|001 → P1 +1(61)
B	R03	B_R03	PS	133	3178.51	11.6341	-1.80666	3.9651	7094.64	65.0452	65.0452	Sperm protamine P1	P1	['P1']	ARYRCCRSQSRSRYYRQRQRSRRRRRRSCQTRRRAMRCCRPRYRPRCRRH	ARYRccRSQsRSRYYRQRQRSRRRRRRScQTRRRAMRccRPRYRPRcRRH	C5(Carbamidomethyl); C6(Carbamidomethyl); S10(O-phospho-L-serine); C29(Carbamidomethyl); C38(Carbamidomethyl); C39(Carbamidomethyl); C47(Carbamidomethyl)	2	51	['S']	[10]	[11]	[]	69.4078	18.36	PS-075	1	P|001	7090.92	61.3199	P1	P1 +1(61)	+1(61)	P1	P|001 → P1 +1(61)
B	R03	B_R03	PS	62	3631.21	11.8262	-1.73218	1.8242	7094.64	65.0488	65.0488	Sperm protamine P1	P1	['P1']	ARYRCCRSQSRSRYYRQRQRSRRRRRRSCQTRRRAMRCCRPRYRPRCRRH	ARYRccRSQSRSRYYRQRQRSRRRRRRScQTRRRAMRccRPRYRPRcRRH	C5(Carbamidomethyl); C6(Carbamidomethyl); C29(Carbamidomethyl); C38(Carbamidomethyl); C39(Carbamidomethyl); C47(Carbamidomethyl)	2	51	[]	[]	[]	[]	138.289	16.35	PS-008	0	P|001	7090.92	61.3199	P1	P1 +1(61)	+1(61)	P1	P|001 → P1 +1(61)
A	R02	A_R02	PS	197	1890.75	10.8847	-2.30588	5.9221	7095.63	66.0307	66.0307	Sperm protamine P1	P1	['P1']	ARYRCCRSQSRSRYYRQRQRSRRRRRRSCQTRRRAMRCCRPRYRPRCRRH	ARYRccRSQSRSRYYRQRQRSRRRRRRScQTRRRAMRccRPRYRPRcRRH	C5(Carbamidomethyl); C6(Carbamidomethyl); C29(Carbamidomethyl); C38(Carbamidomethyl); C39(Carbamidomethyl); C47(Carbamidomethyl)	2	51	[]	[]	[]	[]	149.138	31.45	PS-008	0	P|001	7090.92	61.3199	P1	P1 +1(61)	+1(61)	P1	P|001 → P1 +1(61)
B	R04	B_R04	PS	19	7108.18	12.7953	-2.05931	0.5376	7095.64	66.0443	66.0443	Sperm protamine P1	P1	['P1']	ARYRCCRSQSRSRYYRQRQRSRRRRRRSCQTRRRAMRCCRPRYRPRCRRH	ARYRccRSQSRSRYYRQRQRSRRRRRRScQTRRRAMRccRPRYRPRcRRH	C5(Carbamidomethyl); C6(Carbamidomethyl); C29(Carbamidomethyl); C38(Carbamidomethyl); C39(Carbamidomethyl); C47(Carbamidomethyl)	2	51	[]	[]	[]	[]	63.4224	30.19	PS-008	0	P|001	7090.92	61.3199	P1	P1 +1(61)	+1(61)	P1	P|001 → P1 +1(61)
B	R03	B_R03	PS	105	2585.35	11.3361	-1.9222	3.1204	7095.64	66.0457	66.0457	Sperm protamine P1	P1	['P1']	ARYRCCRSQSRSRYYRQRQRSRRRRRRSCQTRRRAMRCCRPRYRPRCRRH	ARYRccRSQSRSRYYRQRQRSRRRRRRScQTRRRAMRccRPRYRPRcRRH	C5(Carbamidomethyl); C6(Carbamidomethyl); C29(Carbamidomethyl); C38(Carbamidomethyl); C39(Carbamidomethyl); C47(Carbamidomethyl)	2	51	[]	[]	[]	[]	131.483	22.1	PS-008	0	P|001	7090.92	61.3199	P1	P1 +1(61)	+1(61)	P1	P|001 → P1 +1(61)
A	R02	A_R02	PS	437	30965.5	14.9184	-0.637313	12.93	7102.61	73.0171	73.0171	Sperm protamine P1	P1	['P1']	ARYRCCRSQSRSRYYRQRQRSRRRRRRSCQTRRRAMRCCRPRYRPRCRRH	ARYRccRSQsRSRYYRQRQRSRRRRRRScQTRRRAMRccRPRYRPRcRRH	C5(Carbamidomethyl); C6(Carbamidomethyl); S10(O-phospho-L-serine); C29(Carbamidomethyl); C38(Carbamidomethyl); C39(Carbamidomethyl); C47(Carbamidomethyl)	2	51	['S']	[10]	[11]	[]	37.5748	89.09	PS-075	1	P|002	7108.86	79.2658	P1	P1 +1ph	+1ph	P1	P|002 → P1 +1ph
A	R02	A_R02	PS	136	1920.77	10.9075	-2.29648	4.0796	7103.62	74.0279	74.0279	Sperm protamine P1	P1	['P1']	ARYRCCRSQSRSRYYRQRQRSRRRRRRSCQTRRRAMRCCRPRYRPRCRRH	ARYRccRSQsRSRYYRQRQRSRRRRRRScQTRRRAMRccRPRYRPRcRRH	C5(Carbamidomethyl); C6(Carbamidomethyl); S10(O-phospho-L-serine); C29(Carbamidomethyl); C38(Carbamidomethyl); C39(Carbamidomethyl); C47(Carbamidomethyl)	2	51	['S']	[10]	[11]	[]	145.859	9.46	PS-075	1	P|002	7108.86	79.2658	P1	P1 +1ph	+1ph	P1	P|002 → P1 +1ph
A	R02	A_R02	PS	409	37432.3	15.192	-0.524125	12.1133	7103.64	74.0468	74.0468	Sperm protamine P1	P1	['P1']	ARYRCCRSQSRSRYYRQRQRSRRRRRRSCQTRRRAMRCCRPRYRPRCRRH	ARYRccRSQsRSRYYRQRQRSRRRRRRScQTRRRAMRccRPRYRPRcRRH	C5(Carbamidomethyl); C6(Carbamidomethyl); S10(O-phospho-L-serine); C29(Carbamidomethyl); C38(Carbamidomethyl); C39(Carbamidomethyl); C47(Carbamidomethyl)	2	51	['S']	[10]	[11]	[]	35.5051	105.91	PS-075	1	P|002	7108.86	79.2658	P1	P1 +1ph	+1ph	P1	P|002 → P1 +1ph
B	R03	B_R03	PS	449	96184.3	16.5535	0.100739	13.1897	7104.54	74.946	74.946	Sperm protamine P1	P1	['P1']	ARYRCCRSQSRSRYYRQRQRSRRRRRRSCQTRRRAMRCCRPRYRPRCRRH	ARYRccRSQsRSRYYRQRQRSRRRRRRScQTRRRAMRccRPRYRPRcRRH	C5(Carbamidomethyl); C6(Carbamidomethyl); S10(O-phospho-L-serine); C29(Carbamidomethyl); C38(Carbamidomethyl); C39(Carbamidomethyl); C47(Carbamidomethyl)	2	51	['S']	[10]	[11]	[]	38.1316	91.45	PS-075	1	P|002	7108.86	79.2658	P1	P1 +1ph	+1ph	P1	P|002 → P1 +1ph
A	R01	A_R01	PS	362	94073.6	16.5215	-0.263456	10.537	7104.56	74.9651	74.9651	Sperm protamine P1	P1	['P1']	ARYRCCRSQSRSRYYRQRQRSRRRRRRSCQTRRRAMRCCRPRYRPRCRRH	ARYRccRSQsRSRYYRQRQRSRRRRRRScQTRRRAMRccRPRYRPRcRRH	C5(Carbamidomethyl); C6(Carbamidomethyl); S10(O-phospho-L-serine); C29(Carbamidomethyl); C38(Carbamidomethyl); C39(Carbamidomethyl); C47(Carbamidomethyl)	2	51	['S']	[10]	[11]	[]	40.1169	96.39	PS-075	1	P|002	7108.86	79.2658	P1	P1 +1ph	+1ph	P1	P|002 → P1 +1ph
B	R03	B_R03	PS	199	2502.24	11.289	-1.94048	5.9563	7104.58	74.9864	74.9864	Sperm protamine P1	P1	['P1']	ARYRCCRSQSRSRYYRQRQRSRRRRRRSCQTRRRAMRCCRPRYRPRCRRH	ARYRccRSQsRSRYYRQRQRSRRRRRRScQTRRRAMRccRPRYRPRcRRH	C5(Carbamidomethyl); C6(Carbamidomethyl); S10(O-phospho-L-serine); C29(Carbamidomethyl); C38(Carbamidomethyl); C39(Carbamidomethyl); C47(Carbamidomethyl)	2	51	['S']	[10]	[11]	[]	35.703	24.12	PS-075	1	P|002	7108.86	79.2658	P1	P1 +1ph	+1ph	P1	P|002 → P1 +1ph
B	R03	B_R03	PS	423	33138.8	15.0162	-0.495315	12.4264	7104.59	74.9904	74.9904	Sperm protamine P1	P1	['P1']	ARYRCCRSQSRSRYYRQRQRSRRRRRRSCQTRRRAMRCCRPRYRPRCRRH	ARYRccRSQsRSRYYRQRQRSRRRRRRScQTRRRAMRccRPRYRPRcRRH	C5(Carbamidomethyl); C6(Carbamidomethyl); S10(O-phospho-L-serine); C29(Carbamidomethyl); C38(Carbamidomethyl); C39(Carbamidomethyl); C47(Carbamidomethyl)	2	51	['S']	[10]	[11]	[]	33.8039	82.46	PS-075	1	P|002	7108.86	79.2658	P1	P1 +1ph	+1ph	P1	P|002 → P1 +1ph
A	R02	A_R02	PS	377	62383.1	15.9289	-0.219307	11.1771	7104.59	74.9946	74.9946	Sperm protamine P1	P1	['P1']	ARYRCCRSQSRSRYYRQRQRSRRRRRRSCQTRRRAMRCCRPRYRPRCRRH	ARYRccRSQsRSRYYRQRQRSRRRRRRScQTRRRAMRccRPRYRPRcRRH	C5(Carbamidomethyl); C6(Carbamidomethyl); S10(O-phospho-L-serine); C29(Carbamidomethyl); C38(Carbamidomethyl); C39(Carbamidomethyl); C47(Carbamidomethyl)	2	51	['S']	[10]	[11]	[]	40.1169	87.13	PS-075	1	P|002	7108.86	79.2658	P1	P1 +1ph	+1ph	P1	P|002 → P1 +1ph
A	R02	A_R02	PS	429	53021.4	15.6943	-0.316344	12.697	7104.61	75.0128	75.0128	Sperm protamine P1	P1	['P1']	ARYRCCRSQSRSRYYRQRQRSRRRRRRSCQTRRRAMRCCRPRYRPRCRRH	ARYRccRSQsRSRYYRQRQRSRRRRRRScQTRRRAMRccRPRYRPRcRRH	C5(Carbamidomethyl); C6(Carbamidomethyl); S10(O-phospho-L-serine); C29(Carbamidomethyl); C38(Carbamidomethyl); C39(Carbamidomethyl); C47(Carbamidomethyl)	2	51	['S']	[10]	[11]	[]	37.9441	91.87	PS-075	1	P|002	7108.86	79.2658	P1	P1 +1ph	+1ph	P1	P|002 → P1 +1ph
B	R03	B_R03	PS	449	75678.9	16.2076	-0.0333817	13.1897	7105.59	75.9955	75.9955	Sperm protamine P1	P1	['P1']	ARYRCCRSQSRSRYYRQRQRSRRRRRRSCQTRRRAMRCCRPRYRPRCRRH	ARYRccRSQsRSRYYRQRQRSRRRRRRScQTRRRAMRccRPRYRPRcRRH	C5(Carbamidomethyl); C6(Carbamidomethyl); S10(O-phospho-L-serine); C29(Carbamidomethyl); C38(Carbamidomethyl); C39(Carbamidomethyl); C47(Carbamidomethyl)	2	51	['S']	[10]	[11]	[]	38.1316	89.7	PS-075	1	P|002	7108.86	79.2658	P1	P1 +1ph	+1ph	P1	P|002 → P1 +1ph
A	R01	A_R01	TP	952	21180000	24.3362	-2.17305	27.301	7105.63	76.0355	76.0355	P04553	P1	['P1']	ARYRCCRSQSRSRYYRQRQRSRRRRRRSCQTRRRAMRCCRPRYRPRCRRH	M.ARYR(C)[Carbamidomethylation](C)[Carbamidomethylation]RSQSRSRYYRQRQRSRRRRRRS((C)[Carbamidomethylation])[76.0555]QTRRRAMR(C)[Carbamidomethylation](C)[Carbamidomethylation]RPRYRPR(C)[Carbamidomethylation]RRH.		2	51	[]	[]	[]	[]		20.7833	TP-092	0	P|002	7108.86	79.2658	P1	P1 +1ph	+1ph	P1	P|002 → P1 +1ph
B	R03	B_R03	PS	421	72044.8	16.1366	-0.0609096	12.368	7106.57	76.9758	76.9758	Sperm protamine P1	P1	['P1']	ARYRCCRSQSRSRYYRQRQRSRRRRRRSCQTRRRAMRCCRPRYRPRCRRH	ARYRccRSQsRSRYYRQRQRSRRRRRRScQTRRRAMRccRPRYRPRcRRH	C5(Carbamidomethyl); C6(Carbamidomethyl); S10(O-phospho-L-serine); C29(Carbamidomethyl); C38(Carbamidomethyl); C39(Carbamidomethyl); C47(Carbamidomethyl)	2	51	['S']	[10]	[11]	[]	31.0026	115.14	PS-075	1	P|002	7108.86	79.2658	P1	P1 +1ph	+1ph	P1	P|002 → P1 +1ph
B	R03	B_R03	PS	82	5044.04	12.3004	-1.54834	2.4271	7106.59	76.9905	76.9905	Sperm protamine P1	P1	['P1']	ARYRCCRSQSRSRYYRQRQRSRRRRRRSCQTRRRAMRCCRPRYRPRCRRH	ARYRccRSQsRSRYYRQRQRSRRRRRRScQTRRRAMRccRPRYRPRcRRH	C5(Carbamidomethyl); C6(Carbamidomethyl); S10(O-phospho-L-serine); C29(Carbamidomethyl); C38(Carbamidomethyl); C39(Carbamidomethyl); C47(Carbamidomethyl)	2	51	['S']	[10]	[11]	[]	72.7133	44.87	PS-075	1	P|002	7108.86	79.2658	P1	P1 +1ph	+1ph	P1	P|002 → P1 +1ph
A	R02	A_R02	PS	471	133821	17.0299	0.236168	13.8968	7107.57	77.9706	77.9706	Protamine-2	HP3	['pre-P2', 'HPI2', 'HPS1', 'HPS2', 'HP4', 'HP2', 'HP3']	GQSHYRRRHCSRRRLHRIHRRQHRSCRRRKRRSCRHRRRHRRGCRTRKRTCRRH	GQSHYRRRHcSRRRLHRIHRRQHRScRRRKRRScRHRRRHRRGcRTRKRTcRRH	C10(Carbamidomethyl); C26(Carbamidomethyl); C34(Carbamidomethyl); C44(Carbamidomethyl); C51(Carbamidomethyl)	49	102	[]	[]	[]	[]	1	30.33	PS-017	0	P|002	7108.86	79.2658	P1	P1 +1ph	+1ph	P1	P|002 → P1 +1ph
B	R03	B_R03	PS	123	12909.7	13.6562	-1.02266	3.6636	7107.58	77.9823	77.9823	Sperm protamine P1	P1	['P1']	ARYRCCRSQSRSRYYRQRQRSRRRRRRSCQTRRRAMRCCRPRYRPRCRRH	ARYRccRSQsRSRYYRQRQRSRRRRRRScQTRRRAMRccRPRYRPRcRRH	C5(Carbamidomethyl); C6(Carbamidomethyl); S10(O-phospho-L-serine); C29(Carbamidomethyl); C38(Carbamidomethyl); C39(Carbamidomethyl); C47(Carbamidomethyl)	2	51	['S']	[10]	[11]	[]	31.0403	60.43	PS-075	1	P|002	7108.86	79.2658	P1	P1 +1ph	+1ph	P1	P|002 → P1 +1ph
B	R04	B_R04	TP	1167	410300000	28.6121	-0.808773	32.999	7107.59	77.9904	77.9904	P04553	P1	['P1']	ARYRCCRSQSRSRYYRQRQRSRRRRRRSCQTRRRAMRCCRPRYRPRCRRH	M.ARYR(C)[Carbamidomethylation](C)[Carbamidomethylation]RSQSRSRYYRQRQRSRR(RRRRS(C)[Carbamidomethylation])[78.2004]QTRRRAMR(C)[Carbamidomethylation](C)[Carbamidomethylation]RPRYRPR(C)[Carbamidomethylation]RRH.		2	51	[]	[]	[]	[]		19.8171	TP-171	0	P|002	7108.86	79.2658	P1	P1 +1ph	+1ph	P1	P|002 → P1 +1ph
A	R01	A_R01	PS	302	252633	17.9467	0.404837	8.9186	7107.59	77.9935	77.9935	Sperm protamine P1	P1	['P1']	ARYRCCRSQSRSRYYRQRQRSRRRRRRSCQTRRRAMRCCRPRYRPRCRRH	ARYRccRSQsRSRYYRQRQRSRRRRRRScQTRRRAMRccRPRYRPRcRRH	C5(Carbamidomethyl); C6(Carbamidomethyl); S10(O-phospho-L-serine); C29(Carbamidomethyl); C38(Carbamidomethyl); C39(Carbamidomethyl); C47(Carbamidomethyl)	2	51	['S']	[10]	[11]	[]	35.3432	103.29	PS-075	1	P|002	7108.86	79.2658	P1	P1 +1ph	+1ph	P1	P|002 → P1 +1ph
A	R01	A_R01	PS	488	92093.1	16.4908	-0.27785	14.1002	7107.62	78.0266	78.0266	Protamine-2	HP3	['pre-P2', 'HPI2', 'HPS1', 'HPS2', 'HP4', 'HP2', 'HP3']	GQSHYRRRHCSRRRLHRIHRRQHRSCRRRKRRSCRHRRRHRRGCRTRKRTCRRH	GQSHYRRRHcSRRRLHRIHRRQHRScRRRKRRScRHRRRHRRGcRTRKRTcRRH	C10(Carbamidomethyl); C26(Carbamidomethyl); C34(Carbamidomethyl); C44(Carbamidomethyl); C51(Carbamidomethyl)	49	102	[]	[]	[]	[]	1	27.24	PS-017	0	P|002	7108.86	79.2658	P1	P1 +1ph	+1ph	P1	P|002 → P1 +1ph
B	R03	B_R03	PS	467	172696	17.3979	0.428126	13.6878	7108.53	78.931	78.931	Sperm protamine P1	P1	['P1']	ARYRCCRSQSRSRYYRQRQRSRRRRRRSCQTRRRAMRCCRPRYRPRCRRH	ARYRccRsQSRSRYYRQRQRSRRRRRRScQTRRRAMRccRPRYRPRcRRH	C5(Carbamidomethyl); C6(Carbamidomethyl); S8(O-phospho-L-serine); C29(Carbamidomethyl); C38(Carbamidomethyl); C39(Carbamidomethyl); C47(Carbamidomethyl)	2	51	['S']	[8]	[9]	[]	3.77489	5.64	PS-037	1	P|002	7108.86	79.2658	P1	P1 +1ph	+1ph	P1	P|002 → P1 +1ph
B	R03	B_R03	PS	403	390095	18.5735	0.883939	11.8448	7108.53	78.933	78.933	Sperm protamine P1	P1	['P1']	ARYRCCRSQSRSRYYRQRQRSRRRRRRSCQTRRRAMRCCRPRYRPRCRRH	ARYRccRSQsRSRYYRQRQRSRRRRRRScQTRRRAMRccRPRYRPRcRRH	C5(Carbamidomethyl); C6(Carbamidomethyl); S10(O-phospho-L-serine); C29(Carbamidomethyl); C38(Carbamidomethyl); C39(Carbamidomethyl); C47(Carbamidomethyl)	2	51	['S']	[10]	[11]	[]	36.8578	104.04	PS-075	1	P|002	7108.86	79.2658	P1	P1 +1ph	+1ph	P1	P|002 → P1 +1ph
A	R01	A_R01	PS	368	861241	19.7161	1.23452	10.7002	7108.55	78.9501	78.9501	Sperm protamine P1	P1	['P1']	ARYRCCRSQSRSRYYRQRQRSRRRRRRSCQTRRRAMRCCRPRYRPRCRRH	ARYRccRSQsRSRYYRQRQRSRRRRRRScQTRRRAMRccRPRYRPRcRRH	C5(Carbamidomethyl); C6(Carbamidomethyl); S10(O-phospho-L-serine); C29(Carbamidomethyl); C38(Carbamidomethyl); C39(Carbamidomethyl); C47(Carbamidomethyl)	2	51	['S']	[10]	[11]	[]	38.5124	118.85	PS-075	1	P|002	7108.86	79.2658	P1	P1 +1ph	+1ph	P1	P|002 → P1 +1ph
B	R03	B_R03	PS	347	604569	19.2055	1.12902	10.2501	7108.55	78.9501	78.9501	Sperm protamine P1	P1	['P1']	ARYRCCRSQSRSRYYRQRQRSRRRRRRSCQTRRRAMRCCRPRYRPRCRRH	ARYRccRSQsRSRYYRQRQRSRRRRRRScQTRRRAMRccRPRYRPRcRRH	C5(Carbamidomethyl); C6(Carbamidomethyl); S10(O-phospho-L-serine); C29(Carbamidomethyl); C38(Carbamidomethyl); C39(Carbamidomethyl); C47(Carbamidomethyl)	2	51	['S']	[10]	[11]	[]	40.1169	119.05	PS-075	1	P|002	7108.86	79.2658	P1	P1 +1ph	+1ph	P1	P|002 → P1 +1ph
B	R03	B_R03	PS	361	796084	19.6026	1.28295	10.6372	7108.55	78.9513	78.9513	Sperm protamine P1	P1	['P1']	ARYRCCRSQSRSRYYRQRQRSRRRRRRSCQTRRRAMRCCRPRYRPRCRRH	ARYRccRSQsRSRYYRQRQRSRRRRRRScQTRRRAMRccRPRYRPRcRRH	C5(Carbamidomethyl); C6(Carbamidomethyl); S10(O-phospho-L-serine); C29(Carbamidomethyl); C38(Carbamidomethyl); C39(Carbamidomethyl); C47(Carbamidomethyl)	2	51	['S']	[10]	[11]	[]	21.029	83.85	PS-075	1	P|002	7108.86	79.2658	P1	P1 +1ph	+1ph	P1	P|002 → P1 +1ph
A	R02	A_R02	PS	345	429705	18.713	0.932384	10.2581	7108.55	78.9533	78.9533	Sperm protamine P1	P1	['P1']	ARYRCCRSQSRSRYYRQRQRSRRRRRRSCQTRRRAMRCCRPRYRPRCRRH	ARYRccRSQsRSRYYRQRQRSRRRRRRScQTRRRAMRccRPRYRPRcRRH	C5(Carbamidomethyl); C6(Carbamidomethyl); S10(O-phospho-L-serine); C29(Carbamidomethyl); C38(Carbamidomethyl); C39(Carbamidomethyl); C47(Carbamidomethyl)	2	51	['S']	[10]	[11]	[]	37.0344	104.2	PS-075	1	P|002	7108.86	79.2658	P1	P1 +1ph	+1ph	P1	P|002 → P1 +1ph
A	R01	A_R01	PS	422	650357	19.3109	1.04453	12.2277	7108.56	78.9644	78.9644	Sperm protamine P1	P1	['P1']	ARYRCCRSQSRSRYYRQRQRSRRRRRRSCQTRRRAMRCCRPRYRPRCRRH	ARYRccRSQsRSRYYRQRQRSRRRRRRScQTRRRAMRccRPRYRPRcRRH	C5(Carbamidomethyl); C6(Carbamidomethyl); S10(O-phospho-L-serine); C29(Carbamidomethyl); C38(Carbamidomethyl); C39(Carbamidomethyl); C47(Carbamidomethyl)	2	51	['S']	[10]	[11]	[]	37.9441	102.51	PS-075	1	P|002	7108.86	79.2658	P1	P1 +1ph	+1ph	P1	P|002 → P1 +1ph
B	R03	B_R03	PS	339	760885	19.5373	1.25766	10.0271	7108.56	78.9684	78.9684	Sperm protamine P1	P1	['P1']	ARYRCCRSQSRSRYYRQRQRSRRRRRRSCQTRRRAMRCCRPRYRPRCRRH	ARYRccRSQsRSRYYRQRQRSRRRRRRScQTRRRAMRccRPRYRPRcRRH	C5(Carbamidomethyl); C6(Carbamidomethyl); S10(O-phospho-L-serine); C29(Carbamidomethyl); C38(Carbamidomethyl); C39(Carbamidomethyl); C47(Carbamidomethyl)	2	51	['S']	[10]	[11]	[]	29.4739	115.78	PS-075	1	P|002	7108.86	79.2658	P1	P1 +1ph	+1ph	P1	P|002 → P1 +1ph
A	R02	A_R02	PS	367	661537	19.3355	1.18988	10.8908	7108.57	78.9711	78.9711	Sperm protamine P1	P1	['P1']	ARYRCCRSQSRSRYYRQRQRSRRRRRRSCQTRRRAMRCCRPRYRPRCRRH	ARYRccRSQsRSRYYRQRQRSRRRRRRScQTRRRAMRccRPRYRPRcRRH	C5(Carbamidomethyl); C6(Carbamidomethyl); S10(O-phospho-L-serine); C29(Carbamidomethyl); C38(Carbamidomethyl); C39(Carbamidomethyl); C47(Carbamidomethyl)	2	51	['S']	[10]	[11]	[]	35.8336	109.85	PS-075	1	P|002	7108.86	79.2658	P1	P1 +1ph	+1ph	P1	P|002 → P1 +1ph
A	R01	A_R01	PS	412	580916	19.148	0.968138	11.9367	7108.57	78.9718	78.9718	Sperm protamine P1	P1	['P1']	ARYRCCRSQSRSRYYRQRQRSRRRRRRSCQTRRRAMRCCRPRYRPRCRRH	ARYRccRSQsRSRYYRQRQRSRRRRRRScQTRRRAMRccRPRYRPRcRRH	C5(Carbamidomethyl); C6(Carbamidomethyl); S10(O-phospho-L-serine); C29(Carbamidomethyl); C38(Carbamidomethyl); C39(Carbamidomethyl); C47(Carbamidomethyl)	2	51	['S']	[10]	[11]	[]	39.0984	119.1	PS-075	1	P|002	7108.86	79.2658	P1	P1 +1ph	+1ph	P1	P|002 → P1 +1ph
B	R03	B_R03	PS	429	703639	19.4245	1.2139	12.6051	7108.57	78.9722	78.9722	Sperm protamine P1	P1	['P1']	ARYRCCRSQSRSRYYRQRQRSRRRRRRSCQTRRRAMRCCRPRYRPRCRRH	ARYRccRSQsRSRYYRQRQRSRRRRRRScQTRRRAMRccRPRYRPRcRRH	C5(Carbamidomethyl); C6(Carbamidomethyl); S10(O-phospho-L-serine); C29(Carbamidomethyl); C38(Carbamidomethyl); C39(Carbamidomethyl); C47(Carbamidomethyl)	2	51	['S']	[10]	[11]	[]	41.4134	114.64	PS-075	1	P|002	7108.86	79.2658	P1	P1 +1ph	+1ph	P1	P|002 → P1 +1ph
B	R04	B_R04	PS	829	112446	16.7789	-0.490919	23.1523	7108.57	78.9727	78.9727	Sperm protamine P1	P1	['P1']	ARYRCCRSQSRSRYYRQRQRSRRRRRRSCQTRRRAMRCCRPRYRPRCRRH	ARYRccRSQsRSRYYRQRQRSRRRRRRScQTRRRAMRccRPRYRPRcRRH	C5(Carbamidomethyl); C6(Carbamidomethyl); S10(O-phospho-L-serine); C29(Carbamidomethyl); C38(Carbamidomethyl); C39(Carbamidomethyl); C47(Carbamidomethyl)	2	51	['S']	[10]	[11]	[]	43.7766	91.33	PS-075	1	P|002	7108.86	79.2658	P1	P1 +1ph	+1ph	P1	P|002 → P1 +1ph
B	R03	B_R03	PS	395	278032	18.0849	0.694502	11.6149	7108.57	78.9731	78.9731	Sperm protamine P1	P1	['P1']	ARYRCCRSQSRSRYYRQRQRSRRRRRRSCQTRRRAMRCCRPRYRPRCRRH	ARYRccRSQsRSRYYRQRQRSRRRRRRScQTRRRAMRccRPRYRPRcRRH	C5(Carbamidomethyl); C6(Carbamidomethyl); S10(O-phospho-L-serine); C29(Carbamidomethyl); C38(Carbamidomethyl); C39(Carbamidomethyl); C47(Carbamidomethyl)	2	51	['S']	[10]	[11]	[]	10.1897	97.38	PS-075	1	P|002	7108.86	79.2658	P1	P1 +1ph	+1ph	P1	P|002 → P1 +1ph
A	R02	A_R02	PS	457	316418	18.2715	0.749744	13.5172	7108.57	78.9737	78.9737	Sperm protamine P1	P1	['P1']	ARYRCCRSQSRSRYYRQRQRSRRRRRRSCQTRRRAMRCCRPRYRPRCRRH	ARYRccRSQsRSRYYRQRQRSRRRRRRScQTRRRAMRccRPRYRPRcRRH	C5(Carbamidomethyl); C6(Carbamidomethyl); S10(O-phospho-L-serine); C29(Carbamidomethyl); C38(Carbamidomethyl); C39(Carbamidomethyl); C47(Carbamidomethyl)	2	51	['S']	[10]	[11]	[]	27.8372	126.42	PS-075	1	P|002	7108.86	79.2658	P1	P1 +1ph	+1ph	P1	P|002 → P1 +1ph
A	R02	A_R02	PS	333	381867	18.5427	0.861947	9.9269	7108.57	78.9737	78.9737	Sperm protamine P1	P1	['P1']	ARYRCCRSQSRSRYYRQRQRSRRRRRRSCQTRRRAMRCCRPRYRPRCRRH	ARYRccRSQsRSRYYRQRQRSRRRRRRScQTRRRAMRccRPRYRPRcRRH	C5(Carbamidomethyl); C6(Carbamidomethyl); S10(O-phospho-L-serine); C29(Carbamidomethyl); C38(Carbamidomethyl); C39(Carbamidomethyl); C47(Carbamidomethyl)	2	51	['S']	[10]	[11]	[]	34.5559	98.4	PS-075	1	P|002	7108.86	79.2658	P1	P1 +1ph	+1ph	P1	P|002 → P1 +1ph
B	R03	B_R03	PS	315	436299	18.735	0.946555	9.3595	7108.57	78.9741	78.9741	Sperm protamine P1	P1	['P1']	ARYRCCRSQSRSRYYRQRQRSRRRRRRSCQTRRRAMRCCRPRYRPRCRRH	ARYRccRSQsRSRYYRQRQRSRRRRRRScQTRRRAMRccRPRYRPRcRRH	C5(Carbamidomethyl); C6(Carbamidomethyl); S10(O-phospho-L-serine); C29(Carbamidomethyl); C38(Carbamidomethyl); C39(Carbamidomethyl); C47(Carbamidomethyl)	2	51	['S']	[10]	[11]	[]	27.9637	112.01	PS-075	1	P|002	7108.86	79.2658	P1	P1 +1ph	+1ph	P1	P|002 → P1 +1ph
B	R03	B_R03	PS	220	16004.1	13.9662	-0.902463	6.59	7108.57	78.9747	78.9747	Sperm protamine P1	P1	['P1']	ARYRCCRSQSRSRYYRQRQRSRRRRRRSCQTRRRAMRCCRPRYRPRCRRH	ARYRccRsQSRSRYYRQRQRSRRRRRRScQTRRRAMRccRPRYRPRcRRH	C5(Carbamidomethyl); C6(Carbamidomethyl); S8(O-phospho-L-serine); C29(Carbamidomethyl); C38(Carbamidomethyl); C39(Carbamidomethyl); C47(Carbamidomethyl)	2	51	['S']	[8]	[9]	[]	4.0103	39.26	PS-037	1	P|002	7108.86	79.2658	P1	P1 +1ph	+1ph	P1	P|002 → P1 +1ph
A	R02	A_R02	PS	409	391558	18.5789	0.876903	12.1133	7108.57	78.9755	78.9755	Sperm protamine P1	P1	['P1']	ARYRCCRSQSRSRYYRQRQRSRRRRRRSCQTRRRAMRCCRPRYRPRCRRH	ARYRccRSQsRSRYYRQRQRSRRRRRRScQTRRRAMRccRPRYRPRcRRH	C5(Carbamidomethyl); C6(Carbamidomethyl); S10(O-phospho-L-serine); C29(Carbamidomethyl); C38(Carbamidomethyl); C39(Carbamidomethyl); C47(Carbamidomethyl)	2	51	['S']	[10]	[11]	[]	35.5051	128.84	PS-075	1	P|002	7108.86	79.2658	P1	P1 +1ph	+1ph	P1	P|002 → P1 +1ph
B	R03	B_R03	PS	385	822565	19.6498	1.30126	11.3245	7108.57	78.9759	78.9759	Sperm protamine P1	P1	['P1']	ARYRCCRSQSRSRYYRQRQRSRRRRRRSCQTRRRAMRCCRPRYRPRCRRH	ARYRccRSQsRSRYYRQRQRSRRRRRRScQTRRRAMRccRPRYRPRcRRH	C5(Carbamidomethyl); C6(Carbamidomethyl); S10(O-phospho-L-serine); C29(Carbamidomethyl); C38(Carbamidomethyl); C39(Carbamidomethyl); C47(Carbamidomethyl)	2	51	['S']	[10]	[11]	[]	40.3272	118.1	PS-075	1	P|002	7108.86	79.2658	P1	P1 +1ph	+1ph	P1	P|002 → P1 +1ph
B	R03	B_R03	PS	409	741055	19.4992	1.24288	12.017	7108.57	78.9761	78.9761	Sperm protamine P1	P1	['P1']	ARYRCCRSQSRSRYYRQRQRSRRRRRRSCQTRRRAMRCCRPRYRPRCRRH	ARYRccRSQsRSRYYRQRQRSRRRRRRScQTRRRAMRccRPRYRPRcRRH	C5(Carbamidomethyl); C6(Carbamidomethyl); S10(O-phospho-L-serine); C29(Carbamidomethyl); C38(Carbamidomethyl); C39(Carbamidomethyl); C47(Carbamidomethyl)	2	51	['S']	[10]	[11]	[]	39.703	99.93	PS-075	1	P|002	7108.86	79.2658	P1	P1 +1ph	+1ph	P1	P|002 → P1 +1ph
B	R03	B_R03	PS	369	554419	19.0806	1.08058	10.8539	7108.57	78.9762	78.9762	Sperm protamine P1	P1	['P1']	ARYRCCRSQSRSRYYRQRQRSRRRRRRSCQTRRRAMRCCRPRYRPRCRRH	ARYRccRSQsRSRYYRQRQRSRRRRRRScQTRRRAMRccRPRYRPRcRRH	C5(Carbamidomethyl); C6(Carbamidomethyl); S10(O-phospho-L-serine); C29(Carbamidomethyl); C38(Carbamidomethyl); C39(Carbamidomethyl); C47(Carbamidomethyl)	2	51	['S']	[10]	[11]	[]	38.5124	126.46	PS-075	1	P|002	7108.86	79.2658	P1	P1 +1ph	+1ph	P1	P|002 → P1 +1ph
A	R02	A_R02	PS	389	310304	18.2433	0.7381	11.5264	7108.57	78.9768	78.9768	Sperm protamine P1	P1	['P1']	ARYRCCRSQSRSRYYRQRQRSRRRRRRSCQTRRRAMRCCRPRYRPRCRRH	ARYRccRSQsRSRYYRQRQRSRRRRRRScQTRRRAMRccRPRYRPRcRRH	C5(Carbamidomethyl); C6(Carbamidomethyl); S10(O-phospho-L-serine); C29(Carbamidomethyl); C38(Carbamidomethyl); C39(Carbamidomethyl); C47(Carbamidomethyl)	2	51	['S']	[10]	[11]	[]	36.0002	120.73	PS-075	1	P|002	7108.86	79.2658	P1	P1 +1ph	+1ph	P1	P|002 → P1 +1ph
B	R03	B_R03	PS	303	509242	18.958	1.03303	9.02	7108.57	78.9771	78.9771	Sperm protamine P1	P1	['P1']	ARYRCCRSQSRSRYYRQRQRSRRRRRRSCQTRRRAMRCCRPRYRPRCRRH	ARYRccRSQsRSRYYRQRQRSRRRRRRScQTRRRAMRccRPRYRPRcRRH	C5(Carbamidomethyl); C6(Carbamidomethyl); S10(O-phospho-L-serine); C29(Carbamidomethyl); C38(Carbamidomethyl); C39(Carbamidomethyl); C47(Carbamidomethyl)	2	51	['S']	[10]	[11]	[]	25.5265	109.85	PS-075	1	P|002	7108.86	79.2658	P1	P1 +1ph	+1ph	P1	P|002 → P1 +1ph
B	R03	B_R03	PS	275	746849	19.5105	1.24724	8.227	7108.57	78.9777	78.9777	Sperm protamine P1	P1	['P1']	ARYRCCRSQSRSRYYRQRQRSRRRRRRSCQTRRRAMRCCRPRYRPRCRRH	ARYRccRSQsRSRYYRQRQRSRRRRRRScQTRRRAMRccRPRYRPRcRRH	C5(Carbamidomethyl); C6(Carbamidomethyl); S10(O-phospho-L-serine); C29(Carbamidomethyl); C38(Carbamidomethyl); C39(Carbamidomethyl); C47(Carbamidomethyl)	2	51	['S']	[10]	[11]	[]	37.0344	103.9	PS-075	1	P|002	7108.86	79.2658	P1	P1 +1ph	+1ph	P1	P|002 → P1 +1ph
A	R02	A_R02	TP	345	1283000000	30.2569	0.093331	10.2582	7108.57	78.9782	78.9782	P04553	P1	['P1']	ARYRCCRSQSRSRYYRQRQRSRRRRRRSCQTRRRAMRCCRPRYRPRCRRH	M.ARYR(C)[Carbamidomethylation](C)[Carbamidomethylation]RSQ(S)[Phospho]RSRYYRQRQRSRRRRRRS(C)[Carbamidomethylation]QTRRRAMR(C)[Carbamidomethylation](C)[Carbamidomethylation]RPRYRPR(C)[Carbamidomethylation]RRH.	Phospho[S11:95.8%]	2	51	['S']	[11]	[11]	[95.8]		24.0163	TP-019	1	P|002	7108.86	79.2658	P1	P1 +1ph	+1ph	P1	P|002 → P1 +1ph
B	R03	B_R03	PS	287	461391	18.8156	0.977834	8.5659	7108.58	78.9794	78.9794	Sperm protamine P1	P1	['P1']	ARYRCCRSQSRSRYYRQRQRSRRRRRRSCQTRRRAMRCCRPRYRPRCRRH	ARYRccRSQsRSRYYRQRQRSRRRRRRScQTRRRAMRccRPRYRPRcRRH	C5(Carbamidomethyl); C6(Carbamidomethyl); S10(O-phospho-L-serine); C29(Carbamidomethyl); C38(Carbamidomethyl); C39(Carbamidomethyl); C47(Carbamidomethyl)	2	51	['S']	[10]	[11]	[]	34.1006	113.86	PS-075	1	P|002	7108.86	79.2658	P1	P1 +1ph	+1ph	P1	P|002 → P1 +1ph
B	R03	B_R03	PS	207	17635.8	14.1062	-0.848155	6.1984	7108.58	78.9796	78.9796	Sperm protamine P1	P1	['P1']	ARYRCCRSQSRSRYYRQRQRSRRRRRRSCQTRRRAMRCCRPRYRPRCRRH	ARYRccRSQsRSRYYRQRQRSRRRRRRScQTRRRAMRccRPRYRPRcRRH	C5(Carbamidomethyl); C6(Carbamidomethyl); S10(O-phospho-L-serine); C29(Carbamidomethyl); C38(Carbamidomethyl); C39(Carbamidomethyl); C47(Carbamidomethyl)	2	51	['S']	[10]	[11]	[]	38.6929	42.56	PS-075	1	P|002	7108.86	79.2658	P1	P1 +1ph	+1ph	P1	P|002 → P1 +1ph
B	R03	B_R03	PS	283	387462	18.5637	0.880151	8.4494	7108.58	78.9821	78.9821	Sperm protamine P1	P1	['P1']	ARYRCCRSQSRSRYYRQRQRSRRRRRRSCQTRRRAMRCCRPRYRPRCRRH	ARYRccRSQsRSRYYRQRQRSRRRRRRScQTRRRAMRccRPRYRPRcRRH	C5(Carbamidomethyl); C6(Carbamidomethyl); S10(O-phospho-L-serine); C29(Carbamidomethyl); C38(Carbamidomethyl); C39(Carbamidomethyl); C47(Carbamidomethyl)	2	51	['S']	[10]	[11]	[]	34.1005	121.18	PS-075	1	P|002	7108.86	79.2658	P1	P1 +1ph	+1ph	P1	P|002 → P1 +1ph
B	R04	B_R04	PS	1255	60042.5	15.8737	-0.847299	35.5722	7108.58	78.9822	78.9822	Sperm protamine P1	P1	['P1']	ARYRCCRSQSRSRYYRQRQRSRRRRRRSCQTRRRAMRCCRPRYRPRCRRH	ARYRccRSQsRSRYYRQRQRSRRRRRRScQTRRRAMRccRPRYRPRcRRH	C5(Carbamidomethyl); C6(Carbamidomethyl); S10(O-phospho-L-serine); C29(Carbamidomethyl); C38(Carbamidomethyl); C39(Carbamidomethyl); C47(Carbamidomethyl)	2	51	['S']	[10]	[11]	[]	55.9982	112.14	PS-075	1	P|002	7108.86	79.2658	P1	P1 +1ph	+1ph	P1	P|002 → P1 +1ph
B	R03	B_R03	PS	166	16526.6	14.0125	-0.884494	4.961	7108.58	78.9825	78.9825	Sperm protamine P1	P1	['P1']	ARYRCCRSQSRSRYYRQRQRSRRRRRRSCQTRRRAMRCCRPRYRPRCRRH	ARYRccRSQsRSRYYRQRQRSRRRRRRScQTRRRAMRccRPRYRPRcRRH	C5(Carbamidomethyl); C6(Carbamidomethyl); S10(O-phospho-L-serine); C29(Carbamidomethyl); C38(Carbamidomethyl); C39(Carbamidomethyl); C47(Carbamidomethyl)	2	51	['S']	[10]	[11]	[]	37.2709	37.68	PS-075	1	P|002	7108.86	79.2658	P1	P1 +1ph	+1ph	P1	P|002 → P1 +1ph
B	R03	B_R03	PS	56	13620.5	13.7335	-0.992674	1.6433	7108.58	78.9827	78.9827	Sperm protamine P1	P1	['P1']	ARYRCCRSQSRSRYYRQRQRSRRRRRRSCQTRRRAMRCCRPRYRPRCRRH	ARYRccRSQsRSRYYRQRQRSRRRRRRScQTRRRAMRccRPRYRPRcRRH	C5(Carbamidomethyl); C6(Carbamidomethyl); S10(O-phospho-L-serine); C29(Carbamidomethyl); C38(Carbamidomethyl); C39(Carbamidomethyl); C47(Carbamidomethyl)	2	51	['S']	[10]	[11]	[]	31.0403	31.66	PS-075	1	P|002	7108.86	79.2658	P1	P1 +1ph	+1ph	P1	P|002 → P1 +1ph
A	R01	A_R01	PS	384	885476	19.7561	1.2533	11.1452	7108.58	78.9845	78.9845	Sperm protamine P1	P1	['P1']	ARYRCCRSQSRSRYYRQRQRSRRRRRRSCQTRRRAMRCCRPRYRPRCRRH	ARYRccRSQsRSRYYRQRQRSRRRRRRScQTRRRAMRccRPRYRPRcRRH	C5(Carbamidomethyl); C6(Carbamidomethyl); S10(O-phospho-L-serine); C29(Carbamidomethyl); C38(Carbamidomethyl); C39(Carbamidomethyl); C47(Carbamidomethyl)	2	51	['S']	[10]	[11]	[]	42.5614	111.98	PS-075	1	P|002	7108.86	79.2658	P1	P1 +1ph	+1ph	P1	P|002 → P1 +1ph
A	R02	A_R02	TP	373	1283000000	30.2569	0.093331	11.0603	7108.58	78.9862	78.9862	P04554	Unidentified	['pre-P2', 'HPI2', 'HPS1', 'HPS2', 'P2-2']	SPEHVEVYERTHGQSHYRRRHCSRRRLHRIHRRQHRSCRRRKRRSCRHRRRHR	L.SPEHVEVYERTHGQSHYRRRH(C)[Carbamidomethylation]SRRRLHRIHRRQHRS(C)[Carbamidomethylation]RRRKRRS(C)[Carbamidomethylation]RHR(R)[-113.0177]RHR.R		37	89	[]	[]	[]	[]		21.1183	TP-163	0	P|002	7108.86	79.2658	P1	P1 +1ph	+1ph	P1	P|002 → P1 +1ph
B	R03	B_R03	TP	123	2667000000	31.3126	0.580452	3.66367	7108.58	78.989	78.989	P04553	P1	['P1']	ARYRCCRSQSRSRYYRQRQRSRRRRRRSCQTRRRAMRCCRPRYRPRCRRH	M.ARYR(C)[Carbamidomethylation](C)[Carbamidomethylation]RSQSRSRYYRQRQR(S)[Phospho]RRRRRRS(C)[Carbamidomethylation]QTRRRAMR(C)[Carbamidomethylation](C)[Carbamidomethylation]RPRYRPR(C)[Carbamidomethylation]RRH.	Phospho[S22:99.6%]	2	51	['S']	[22]	[22]	[99.6]		14.0112	TP-019	1	P|002	7108.86	79.2658	P1	P1 +1ph	+1ph	P1	P|002 → P1 +1ph
A	R02	A_R02	PS	417	563065	19.1029	1.09369	12.3465	7108.58	78.9891	78.9891	Sperm protamine P1	P1	['P1']	ARYRCCRSQSRSRYYRQRQRSRRRRRRSCQTRRRAMRCCRPRYRPRCRRH	ARYRccRSQsRSRYYRQRQRSRRRRRRScQTRRRAMRccRPRYRPRcRRH	C5(Carbamidomethyl); C6(Carbamidomethyl); S10(O-phospho-L-serine); C29(Carbamidomethyl); C38(Carbamidomethyl); C39(Carbamidomethyl); C47(Carbamidomethyl)	2	51	['S']	[10]	[11]	[]	40.1169	111.82	PS-075	1	P|002	7108.86	79.2658	P1	P1 +1ph	+1ph	P1	P|002 → P1 +1ph
B	R03	B_R03	PS	423	396497	18.5969	0.893045	12.4264	7108.59	78.9905	78.9905	Sperm protamine P1	P1	['P1']	ARYRCCRSQSRSRYYRQRQRSRRRRRRSCQTRRRAMRCCRPRYRPRCRRH	ARYRccRSQsRSRYYRQRQRSRRRRRRScQTRRRAMRccRPRYRPRcRRH	C5(Carbamidomethyl); C6(Carbamidomethyl); S10(O-phospho-L-serine); C29(Carbamidomethyl); C38(Carbamidomethyl); C39(Carbamidomethyl); C47(Carbamidomethyl)	2	51	['S']	[10]	[11]	[]	33.8039	104.29	PS-075	1	P|002	7108.86	79.2658	P1	P1 +1ph	+1ph	P1	P|002 → P1 +1ph
B	R03	B_R03	PS	319	814944	19.6363	1.29605	9.4713	7108.59	78.9929	78.9929	Sperm protamine P1	P1	['P1']	ARYRCCRSQSRSRYYRQRQRSRRRRRRSCQTRRRAMRCCRPRYRPRCRRH	ARYRccRSQsRSRYYRQRQRSRRRRRRScQTRRRAMRccRPRYRPRcRRH	C5(Carbamidomethyl); C6(Carbamidomethyl); S10(O-phospho-L-serine); C29(Carbamidomethyl); C38(Carbamidomethyl); C39(Carbamidomethyl); C47(Carbamidomethyl)	2	51	['S']	[10]	[11]	[]	18.3325	56.73	PS-075	1	P|002	7108.86	79.2658	P1	P1 +1ph	+1ph	P1	P|002 → P1 +1ph
B	R03	B_R03	PS	297	1.18398e+06	20.1752	1.50499	8.8467	7108.59	78.9943	78.9943	Sperm protamine P1	P1	['P1']	ARYRCCRSQSRSRYYRQRQRSRRRRRRSCQTRRRAMRCCRPRYRPRCRRH	ARYRccRSQsRSRYYRQRQRSRRRRRRScQTRRRAMRccRPRYRPRcRRH	C5(Carbamidomethyl); C6(Carbamidomethyl); S10(O-phospho-L-serine); C29(Carbamidomethyl); C38(Carbamidomethyl); C39(Carbamidomethyl); C47(Carbamidomethyl)	2	51	['S']	[10]	[11]	[]	39.703	101.28	PS-075	1	P|002	7108.86	79.2658	P1	P1 +1ph	+1ph	P1	P|002 → P1 +1ph
B	R03	B_R03	PS	341	1.27437e+06	20.2814	1.54614	10.0828	7108.59	78.9953	78.9953	Sperm protamine P1	P1	['P1']	ARYRCCRSQSRSRYYRQRQRSRRRRRRSCQTRRRAMRCCRPRYRPRCRRH	ARYRccRSQsRSRYYRQRQRSRRRRRRScQTRRRAMRccRPRYRPRcRRH	C5(Carbamidomethyl); C6(Carbamidomethyl); S10(O-phospho-L-serine); C29(Carbamidomethyl); C38(Carbamidomethyl); C39(Carbamidomethyl); C47(Carbamidomethyl)	2	51	['S']	[10]	[11]	[]	43.0391	108.34	PS-075	1	P|002	7108.86	79.2658	P1	P1 +1ph	+1ph	P1	P|002 → P1 +1ph
A	R01	A_R01	PS	432	1.18103e+06	20.1716	1.44814	12.5166	7108.59	78.9957	78.9957	Sperm protamine P1	P1	['P1']	ARYRCCRSQSRSRYYRQRQRSRRRRRRSCQTRRRAMRCCRPRYRPRCRRH	ARYRccRSQsRSRYYRQRQRSRRRRRRScQTRRRAMRccRPRYRPRcRRH	C5(Carbamidomethyl); C6(Carbamidomethyl); S10(O-phospho-L-serine); C29(Carbamidomethyl); C38(Carbamidomethyl); C39(Carbamidomethyl); C47(Carbamidomethyl)	2	51	['S']	[10]	[11]	[]	48.809	110.43	PS-075	1	P|002	7108.86	79.2658	P1	P1 +1ph	+1ph	P1	P|002 → P1 +1ph
B	R03	B_R03	PS	441	401044	18.6134	0.899423	12.9558	7108.6	79.0008	79.0008	Sperm protamine P1	P1	['P1']	ARYRCCRSQSRSRYYRQRQRSRRRRRRSCQTRRRAMRCCRPRYRPRCRRH	ARYRccRSQsRSRYYRQRQRSRRRRRRScQTRRRAMRccRPRYRPRcRRH	C5(Carbamidomethyl); C6(Carbamidomethyl); S10(O-phospho-L-serine); C29(Carbamidomethyl); C38(Carbamidomethyl); C39(Carbamidomethyl); C47(Carbamidomethyl)	2	51	['S']	[10]	[11]	[]	29.767	93.62	PS-075	1	P|002	7108.86	79.2658	P1	P1 +1ph	+1ph	P1	P|002 → P1 +1ph
A	R02	A_R02	PS	377	635302	19.2771	1.16573	11.1771	7108.6	79.0031	79.0031	Sperm protamine P1	P1	['P1']	ARYRCCRSQSRSRYYRQRQRSRRRRRRSCQTRRRAMRCCRPRYRPRCRRH	ARYRccRSQsRSRYYRQRQRSRRRRRRScQTRRRAMRccRPRYRPRcRRH	C5(Carbamidomethyl); C6(Carbamidomethyl); S10(O-phospho-L-serine); C29(Carbamidomethyl); C38(Carbamidomethyl); C39(Carbamidomethyl); C47(Carbamidomethyl)	2	51	['S']	[10]	[11]	[]	40.1169	109.31	PS-075	1	P|002	7108.86	79.2658	P1	P1 +1ph	+1ph	P1	P|002 → P1 +1ph
A	R01	A_R01	PS	362	1.33696e+06	20.3505	1.53204	10.537	7108.6	79.0039	79.0039	Sperm protamine P1	P1	['P1']	ARYRCCRSQSRSRYYRQRQRSRRRRRRSCQTRRRAMRCCRPRYRPRCRRH	ARYRccRSQsRSRYYRQRQRSRRRRRRScQTRRRAMRccRPRYRPRcRRH	C5(Carbamidomethyl); C6(Carbamidomethyl); S10(O-phospho-L-serine); C29(Carbamidomethyl); C38(Carbamidomethyl); C39(Carbamidomethyl); C47(Carbamidomethyl)	2	51	['S']	[10]	[11]	[]	40.1169	117.81	PS-075	1	P|002	7108.86	79.2658	P1	P1 +1ph	+1ph	P1	P|002 → P1 +1ph
A	R02	A_R02	PS	355	1.17529e+06	20.1646	1.53286	10.5536	7108.6	79.0046	79.0046	Sperm protamine P1	P1	['P1']	ARYRCCRSQSRSRYYRQRQRSRRRRRRSCQTRRRAMRCCRPRYRPRCRRH	ARYRccRSQsRSRYYRQRQRSRRRRRRScQTRRRAMRccRPRYRPRcRRH	C5(Carbamidomethyl); C6(Carbamidomethyl); S10(O-phospho-L-serine); C29(Carbamidomethyl); C38(Carbamidomethyl); C39(Carbamidomethyl); C47(Carbamidomethyl)	2	51	['S']	[10]	[11]	[]	41.4134	110.92	PS-075	1	P|002	7108.86	79.2658	P1	P1 +1ph	+1ph	P1	P|002 → P1 +1ph
A	R02	A_R02	PS	429	237100	17.8551	0.577521	12.697	7108.6	79.0051	79.0051	Sperm protamine P1	P1	['P1']	ARYRCCRSQSRSRYYRQRQRSRRRRRRSCQTRRRAMRCCRPRYRPRCRRH	ARYRccRSQsRSRYYRQRQRSRRRRRRScQTRRRAMRccRPRYRPRcRRH	C5(Carbamidomethyl); C6(Carbamidomethyl); S10(O-phospho-L-serine); C29(Carbamidomethyl); C38(Carbamidomethyl); C39(Carbamidomethyl); C47(Carbamidomethyl)	2	51	['S']	[10]	[11]	[]	37.9441	111.53	PS-075	1	P|002	7108.86	79.2658	P1	P1 +1ph	+1ph	P1	P|002 → P1 +1ph
B	R03	B_R03	PS	363	1.42496e+06	20.4425	1.60862	10.6955	7108.6	79.0061	79.0061	Sperm protamine P1	P1	['P1']	ARYRCCRSQSRSRYYRQRQRSRRRRRRSCQTRRRAMRCCRPRYRPRCRRH	ARYRccRSQsRSRYYRQRQRSRRRRRRScQTRRRAMRccRPRYRPRcRRH	C5(Carbamidomethyl); C6(Carbamidomethyl); S10(O-phospho-L-serine); C29(Carbamidomethyl); C38(Carbamidomethyl); C39(Carbamidomethyl); C47(Carbamidomethyl)	2	51	['S']	[10]	[11]	[]	39.9089	102.68	PS-075	1	P|002	7108.86	79.2658	P1	P1 +1ph	+1ph	P1	P|002 → P1 +1ph
B	R03	B_R03	PS	199	15396.5	13.9103	-0.924115	5.9563	7108.6	79.0068	79.0068	Sperm protamine P1	P1	['P1']	ARYRCCRSQSRSRYYRQRQRSRRRRRRSCQTRRRAMRCCRPRYRPRCRRH	ARYRccRSQsRSRYYRQRQRSRRRRRRScQTRRRAMRccRPRYRPRcRRH	C5(Carbamidomethyl); C6(Carbamidomethyl); S10(O-phospho-L-serine); C29(Carbamidomethyl); C38(Carbamidomethyl); C39(Carbamidomethyl); C47(Carbamidomethyl)	2	51	['S']	[10]	[11]	[]	35.703	29.49	PS-075	1	P|002	7108.86	79.2658	P1	P1 +1ph	+1ph	P1	P|002 → P1 +1ph
A	R02	A_R02	PS	437	428150	18.7078	0.930219	12.93	7108.61	79.0125	79.0125	Sperm protamine P1	P1	['P1']	ARYRCCRSQSRSRYYRQRQRSRRRRRRSCQTRRRAMRCCRPRYRPRCRRH	ARYRccRSQsRSRYYRQRQRSRRRRRRScQTRRRAMRccRPRYRPRcRRH	C5(Carbamidomethyl); C6(Carbamidomethyl); S10(O-phospho-L-serine); C29(Carbamidomethyl); C38(Carbamidomethyl); C39(Carbamidomethyl); C47(Carbamidomethyl)	2	51	['S']	[10]	[11]	[]	37.5748	109.65	PS-075	1	P|002	7108.86	79.2658	P1	P1 +1ph	+1ph	P1	P|002 → P1 +1ph
A	R02	A_R02	PS	397	633637	19.2733	1.16416	11.7637	7108.61	79.0156	79.0156	Sperm protamine P1	P1	['P1']	ARYRCCRSQSRSRYYRQRQRSRRRRRRSCQTRRRAMRCCRPRYRPRCRRH	ARYRccRSQsRSRYYRQRQRSRRRRRRScQTRRRAMRccRPRYRPRcRRH	C5(Carbamidomethyl); C6(Carbamidomethyl); S10(O-phospho-L-serine); C29(Carbamidomethyl); C38(Carbamidomethyl); C39(Carbamidomethyl); C47(Carbamidomethyl)	2	51	['S']	[10]	[11]	[]	41.6379	118.99	PS-075	1	P|002	7108.86	79.2658	P1	P1 +1ph	+1ph	P1	P|002 → P1 +1ph
B	R03	B_R03	PS	80	18712.4	14.1917	-0.815009	2.3667	7108.62	79.0271	79.0271	Sperm protamine P1	P1	['P1']	ARYRCCRSQSRSRYYRQRQRSRRRRRRSCQTRRRAMRCCRPRYRPRCRRH	ARYRccRSQsRSRYYRQRQRSRRRRRRScQTRRRAMRccRPRYRPRcRRH	C5(Carbamidomethyl); C6(Carbamidomethyl); S10(O-phospho-L-serine); C29(Carbamidomethyl); C38(Carbamidomethyl); C39(Carbamidomethyl); C47(Carbamidomethyl)	2	51	['S']	[10]	[11]	[]	31.0403	49.04	PS-075	1	P|002	7108.86	79.2658	P1	P1 +1ph	+1ph	P1	P|002 → P1 +1ph
B	R03	B_R03	TP	369	2667000000	31.3126	0.580452	10.854	7109.56	79.9596	79.9596	P04553	P1	['P1']	ARYRCCRSQSRSRYYRQRQRSRRRRRRSCQTRRRAMRCCRPRYRPRCRRH	M.ARYR(C)[Carbamidomethylation](C)[Carbamidomethylation]RSQ(S)[Phospho]RSRYYRQRQRSRRRRRRS(C)[Carbamidomethylation]QTRRRAMR(C)[Carbamidomethylation](C)[Carbamidomethylation]RPRYRPR(C)[Carbamidomethylation]RRH.	Phospho[S11:95.6%]	2	51	['S']	[11]	[11]	[95.6]		32.4186	TP-019	1	P|002	7108.86	79.2658	P1	P1 +1ph	+1ph	P1	P|002 → P1 +1ph
B	R03	B_R03	TP	287	2667000000	31.3126	0.580452	8.56583	7109.56	79.9627	79.9627	P04553	P1	['P1']	ARYRCCRSQSRSRYYRQRQRSRRRRRRSCQTRRRAMRCCRPRYRPRCRRH	M.ARYR(C)[Carbamidomethylation](C)[Carbamidomethylation]RSQSR(S)[Phospho]RYYRQRQRSRRRRRRS(C)[Carbamidomethylation]QTRRRAMR(C)[Carbamidomethylation](C)[Carbamidomethylation]RPRYRPR(C)[Carbamidomethylation]RRH.	Phospho[S13:99.8%]	2	51	['S']	[13]	[13]	[99.8]		30.2231	TP-019	1	P|002	7108.86	79.2658	P1	P1 +1ph	+1ph	P1	P|002 → P1 +1ph
B	R03	B_R03	TP	220	2667000000	31.3126	0.580452	6.59	7109.56	79.9664	79.9664	P04553	P1	['P1']	ARYRCCRSQSRSRYYRQRQRSRRRRRRSCQTRRRAMRCCRPRYRPRCRRH	M.ARYR(C)[Carbamidomethylation](C)[Carbamidomethylation]RSQ(S)[Phospho]RSRYYRQRQRSRRRRRRS(C)[Carbamidomethylation]QTRRRAMR(C)[Carbamidomethylation](C)[Carbamidomethylation]RPRYRPR(C)[Carbamidomethylation]RRH.	Phospho[S11:95.5%]	2	51	['S']	[11]	[11]	[95.5]		24.3715	TP-019	1	P|002	7108.86	79.2658	P1	P1 +1ph	+1ph	P1	P|002 → P1 +1ph
B	R03	B_R03	TP	385	2667000000	31.3126	0.580452	11.3245	7109.56	79.9665	79.9665	P04553	P1	['P1']	ARYRCCRSQSRSRYYRQRQRSRRRRRRSCQTRRRAMRCCRPRYRPRCRRH	M.ARYR(C)[Carbamidomethylation](C)[Carbamidomethylation]RSQ(SRS)[Phospho]RYYRQRQRSRRRRRRS(C)[Carbamidomethylation]QTRRRAMR(C)[Carbamidomethylation](C)[Carbamidomethylation]RPRYRPR(C)[Carbamidomethylation]RRH.	Phospho[S11:50.0%;S13:50.0%]	2	51	['S', 'S']	[11, 13]	[11, 13]	[50.0, 50.0]		29.3573	TP-019	1	P|002	7108.86	79.2658	P1	P1 +1ph	+1ph	P1	P|002 → P1 +1ph
B	R03	B_R03	TP	297	2667000000	31.3126	0.580452	8.84667	7109.56	79.9666	79.9666	P04553	P1	['P1']	ARYRCCRSQSRSRYYRQRQRSRRRRRRSCQTRRRAMRCCRPRYRPRCRRH	M.ARYR(C)[Carbamidomethylation](C)[Carbamidomethylation]RSQSR(S)[Phospho]RYYRQRQRSRRRRRRS(C)[Carbamidomethylation]QTRRRAMR(C)[Carbamidomethylation](C)[Carbamidomethylation]RPRYRPR(C)[Carbamidomethylation]RRH.	Phospho[S13:95.6%]	2	51	['S']	[13]	[13]	[95.6]		30.4355	TP-019	1	P|002	7108.86	79.2658	P1	P1 +1ph	+1ph	P1	P|002 → P1 +1ph
A	R01	A_R01	TP	362	400800000	28.5783	-0.657473	10.537	7109.56	79.9671	79.9671	P04553	P1	['P1']	ARYRCCRSQSRSRYYRQRQRSRRRRRRSCQTRRRAMRCCRPRYRPRCRRH	M.ARYR(C)[Carbamidomethylation](C)[Carbamidomethylation]RSQ(S)[Phospho]RSRYYRQRQRSRRRRRRS(C)[Carbamidomethylation]QTRRRAMR(C)[Carbamidomethylation](C)[Carbamidomethylation]RPRYRPR(C)[Carbamidomethylation]RRH.	Phospho[S11:95.8%]	2	51	['S']	[11]	[11]	[95.8]		30.3572	TP-019	1	P|002	7108.86	79.2658	P1	P1 +1ph	+1ph	P1	P|002 → P1 +1ph
B	R04	B_R04	TP	801	410300000	28.6121	-0.808773	22.3263	7109.56	79.9675	79.9675	P04553	P1	['P1']	ARYRCCRSQSRSRYYRQRQRSRRRRRRSCQTRRRAMRCCRPRYRPRCRRH	M.ARYR(C)[Carbamidomethylation](C)[Carbamidomethylation]RSQSRSRYYRQRQRSRRRRRRS(C)[Carbamidomethylation]QTRRRAMR(C)[Carbamidomethylation](C)[Carbamidomethylation]RPR(Y)[Phospho]RPR(C)[Carbamidomethylation]RRH.	Phospho[Y44:95.6%]	2	51	['Y']	[44]	[44]	[95.6]		16.0229	TP-019	1	P|002	7108.86	79.2658	P1	P1 +1ph	+1ph	P1	P|002 → P1 +1ph
A	R02	A_R02	TP	377	1283000000	30.2569	0.093331	11.1772	7109.56	79.969	79.969	P04553	P1	['P1']	ARYRCCRSQSRSRYYRQRQRSRRRRRRSCQTRRRAMRCCRPRYRPRCRRH	M.ARYR(C)[Carbamidomethylation](C)[Carbamidomethylation]RSQ(S)[Phospho]RSRYYRQRQRSRRRRRRS(C)[Carbamidomethylation]QTRRRAMR(C)[Carbamidomethylation](C)[Carbamidomethylation]RPRYRPR(C)[Carbamidomethylation]RRH.	Phospho[S11:95.8%]	2	51	['S']	[11]	[11]	[95.8]		26.0406	TP-019	1	P|002	7108.86	79.2658	P1	P1 +1ph	+1ph	P1	P|002 → P1 +1ph
B	R03	B_R03	TP	319	2667000000	31.3126	0.580452	9.47133	7109.57	79.9694	79.9694	P04553	P1	['P1']	ARYRCCRSQSRSRYYRQRQRSRRRRRRSCQTRRRAMRCCRPRYRPRCRRH	M.ARYR(C)[Carbamidomethylation](C)[Carbamidomethylation]RSQSR(S)[Phospho]RYYRQRQRSRRRRRRS(C)[Carbamidomethylation]QTRRRAMR(C)[Carbamidomethylation](C)[Carbamidomethylation]RPRYRPR(C)[Carbamidomethylation]RRH.	Phospho[S13:99.8%]	2	51	['S']	[13]	[13]	[99.8]		26.7823	TP-019	1	P|002	7108.86	79.2658	P1	P1 +1ph	+1ph	P1	P|002 → P1 +1ph
B	R03	B_R03	TP	255	2667000000	31.3126	0.580452	7.6435	7109.57	79.9698	79.9698	P04553	P1	['P1']	ARYRCCRSQSRSRYYRQRQRSRRRRRRSCQTRRRAMRCCRPRYRPRCRRH	M.ARYR(C)[Carbamidomethylation](C)[Carbamidomethylation]RSQS(RSRYYR)[80.1798]QRQRSRRRRRRS(C)[Carbamidomethylation]QTRRRAMR(C)[Carbamidomethylation](C)[Carbamidomethylation]RPRYRPR(C)[Carbamidomethylation]RRH.		2	51	[]	[]	[]	[]		14.1802	TP-019	0	P|002	7108.86	79.2658	P1	P1 +1ph	+1ph	P1	P|002 → P1 +1ph
A	R02	A_R02	TP	457	1283000000	30.2569	0.093331	13.5172	7109.57	79.9698	79.9698	P04553	P1	['P1']	ARYRCCRSQSRSRYYRQRQRSRRRRRRSCQTRRRAMRCCRPRYRPRCRRH	M.ARYR(C)[Carbamidomethylation](C)[Carbamidomethylation]RSQ(S)[Phospho]RSRYYRQRQRSRRRRRRS(C)[Carbamidomethylation]QTRRRAMR(C)[Carbamidomethylation](C)[Carbamidomethylation]RPRYRPR(C)[Carbamidomethylation]RRH.	Phospho[S11:99.8%]	2	51	['S']	[11]	[11]	[99.8]		29.3353	TP-019	1	P|002	7108.86	79.2658	P1	P1 +1ph	+1ph	P1	P|002 → P1 +1ph
A	R02	A_R02	TP	333	1283000000	30.2569	0.093331	9.927	7109.57	79.9699	79.9699	P04553	P1	['P1']	ARYRCCRSQSRSRYYRQRQRSRRRRRRSCQTRRRAMRCCRPRYRPRCRRH	M.ARYR(C)[Carbamidomethylation](C)[Carbamidomethylation]RSQ(S)[Phospho]RSRYYRQRQRSRRRRRRS(C)[Carbamidomethylation]QTRRRAMR(C)[Carbamidomethylation](C)[Carbamidomethylation]RPRYRPR(C)[Carbamidomethylation]RRH.	Phospho[S11:95.8%]	2	51	['S']	[11]	[11]	[95.8]		27.6531	TP-019	1	P|002	7108.86	79.2658	P1	P1 +1ph	+1ph	P1	P|002 → P1 +1ph
A	R02	A_R02	TP	397	1283000000	30.2569	0.093331	11.7637	7109.57	79.9703	79.9703	P04553	P1	['P1']	ARYRCCRSQSRSRYYRQRQRSRRRRRRSCQTRRRAMRCCRPRYRPRCRRH	M.ARYR(C)[Carbamidomethylation](C)[Carbamidomethylation]RSQ(S)[Phospho]RSRYYRQRQRSRRRRRRS(C)[Carbamidomethylation]QTRRRAMR(C)[Carbamidomethylation](C)[Carbamidomethylation]RPRYRPR(C)[Carbamidomethylation]RRH.	Phospho[S11:95.8%]	2	51	['S']	[11]	[11]	[95.8]		28.4526	TP-019	1	P|002	7108.86	79.2658	P1	P1 +1ph	+1ph	P1	P|002 → P1 +1ph
A	R02	A_R02	TP	355	1283000000	30.2569	0.093331	10.5535	7109.57	79.9704	79.9704	P04553	P1	['P1']	ARYRCCRSQSRSRYYRQRQRSRRRRRRSCQTRRRAMRCCRPRYRPRCRRH	M.ARYR(C)[Carbamidomethylation](C)[Carbamidomethylation]RSQ(S)[Phospho]RSRYYRQRQRSRRRRRRS(C)[Carbamidomethylation]QTRRRAMR(C)[Carbamidomethylation](C)[Carbamidomethylation]RPRYRPR(C)[Carbamidomethylation]RRH.	Phospho[S11:95.8%]	2	51	['S']	[11]	[11]	[95.8]		30.1862	TP-019	1	P|002	7108.86	79.2658	P1	P1 +1ph	+1ph	P1	P|002 → P1 +1ph
A	R02	A_R02	TP	417	1283000000	30.2569	0.093331	12.3465	7109.57	79.9708	79.9708	P04553	P1	['P1']	ARYRCCRSQSRSRYYRQRQRSRRRRRRSCQTRRRAMRCCRPRYRPRCRRH	M.ARYR(C)[Carbamidomethylation](C)[Carbamidomethylation]RSQSR(S)[Phospho]RYYRQRQRSRRRRRRS(C)[Carbamidomethylation]QTRRRAMR(C)[Carbamidomethylation](C)[Carbamidomethylation]RPRYRPR(C)[Carbamidomethylation]RRH.	Phospho[S13:95.8%]	2	51	['S']	[13]	[13]	[95.8]		27.1459	TP-019	1	P|002	7108.86	79.2658	P1	P1 +1ph	+1ph	P1	P|002 → P1 +1ph
A	R02	A_R02	TP	437	1283000000	30.2569	0.093331	12.93	7109.57	79.9712	79.9712	P04553	P1	['P1']	ARYRCCRSQSRSRYYRQRQRSRRRRRRSCQTRRRAMRCCRPRYRPRCRRH	M.ARYR(C)[Carbamidomethylation](C)[Carbamidomethylation]RSQ(SRS)[Phospho]RYYRQRQRSRRRRRRS(C)[Carbamidomethylation]QTRRRAMR(C)[Carbamidomethylation](C)[Carbamidomethylation]RPRYRPR(C)[Carbamidomethylation]RRH.	Phospho[S11:50.0%;S13:50.0%]	2	51	['S', 'S']	[11, 13]	[11, 13]	[50.0, 50.0]		25.9064	TP-019	1	P|002	7108.86	79.2658	P1	P1 +1ph	+1ph	P1	P|002 → P1 +1ph
B	R03	B_R03	TP	133	2667000000	31.3126	0.580452	3.965	7109.57	79.9732	79.9732	P04553	P1	['P1']	ARYRCCRSQSRSRYYRQRQRSRRRRRRSCQTRRRAMRCCRPRYRPRCRRH	M.ARYR(C)[Carbamidomethylation](C)[Carbamidomethylation]RSQSR(SRYY)[Phospho]RQRQRSRRRRRRS(C)[Carbamidomethylation]QTRRRAMR(C)[Carbamidomethylation](C)[Carbamidomethylation]RPRYRPR(C)[Carbamidomethylation]RRH.	Phospho[S13:32.8%;Y15:32.8%;Y16:32.8%]	2	51	['S', 'Y', 'Y']	[13, 15, 16]	[13, 15, 16]	[32.8, 32.8, 32.8]		12.258	TP-019	1	P|002	7108.86	79.2658	P1	P1 +1ph	+1ph	P1	P|002 → P1 +1ph
B	R03	B_R03	TP	216	2667000000	31.3126	0.580452	6.4695	7109.57	79.9733	79.9733	P04553	P1	['P1']	ARYRCCRSQSRSRYYRQRQRSRRRRRRSCQTRRRAMRCCRPRYRPRCRRH	M.ARYR(C)[Carbamidomethylation](C)[Carbamidomethylation]RSQSRSRY(Y)[Phospho]RQRQRSRRRRRRS(C)[Carbamidomethylation]QTRRRAMR(C)[Carbamidomethylation](C)[Carbamidomethylation]RPRYRPR(C)[Carbamidomethylation]RRH.	Phospho[Y16:84.9%]	2	51	['Y']	[16]	[16]	[84.9]		10.9931	TP-019	1	P|002	7108.86	79.2658	P1	P1 +1ph	+1ph	P1	P|002 → P1 +1ph
B	R03	B_R03	TP	174	2667000000	31.3126	0.580452	5.20267	7109.57	79.9735	79.9735	P04553	P1	['P1']	ARYRCCRSQSRSRYYRQRQRSRRRRRRSCQTRRRAMRCCRPRYRPRCRRH	M.ARYR(C)[Carbamidomethylation](C)[Carbamidomethylation]RSQ(SRS)[Phospho]RYYRQRQRSRRRRRRS(C)[Carbamidomethylation]QTRRRAMR(C)[Carbamidomethylation](C)[Carbamidomethylation]RPRYRPR(C)[Carbamidomethylation]RRH.	Phospho[S11:47.8%;S13:47.8%]	2	51	['S', 'S']	[11, 13]	[11, 13]	[47.8, 47.8]		10.3183	TP-019	1	P|002	7108.86	79.2658	P1	P1 +1ph	+1ph	P1	P|002 → P1 +1ph
B	R03	B_R03	TP	72	2667000000	31.3126	0.580452	2.1255	7109.57	79.9737	79.9737	P04553	P1	['P1']	ARYRCCRSQSRSRYYRQRQRSRRRRRRSCQTRRRAMRCCRPRYRPRCRRH	M.ARYR(C)[Carbamidomethylation](C)[Carbamidomethylation]RSQ(SRSRYY)[Phospho]RQRQRSRRRRRRS(C)[Carbamidomethylation]QTRRRAMR(C)[Carbamidomethylation](C)[Carbamidomethylation]RPRYRPR(C)[Carbamidomethylation]RRH.	Phospho[S11:24.7%;S13:24.7%;Y15:24.7%;Y16:24.7%]	2	51	['S', 'S', 'Y', 'Y']	[11, 13, 15, 16]	[11, 13, 15, 16]	[24.7, 24.7, 24.7, 24.7]		11.8543	TP-019	1	P|002	7108.86	79.2658	P1	P1 +1ph	+1ph	P1	P|002 → P1 +1ph
B	R03	B_R03	TP	113	2667000000	31.3126	0.580452	3.36167	7109.57	79.9739	79.9739	P04553	P1	['P1']	ARYRCCRSQSRSRYYRQRQRSRRRRRRSCQTRRRAMRCCRPRYRPRCRRH	M.ARYR(C)[Carbamidomethylation](C)[Carbamidomethylation]RSQSR(SRY)[Phospho]YRQRQRSRRRRRRS(C)[Carbamidomethylation]QTRRRAMR(C)[Carbamidomethylation](C)[Carbamidomethylation]RPRYRPR(C)[Carbamidomethylation]RRH.	Phospho[S13:47.8%;Y15:47.8%]	2	51	['S', 'Y']	[13, 15]	[13, 15]	[47.8, 47.8]		12.9617	TP-019	1	P|002	7108.86	79.2658	P1	P1 +1ph	+1ph	P1	P|002 → P1 +1ph
B	R03	B_R03	TP	13	2667000000	31.3126	0.580452	0.360667	7109.57	79.9744	79.9744	P04553	P1	['P1']	ARYRCCRSQSRSRYYRQRQRSRRRRRRSCQTRRRAMRCCRPRYRPRCRRH	M.ARYR(C)[Carbamidomethylation](C)[Carbamidomethylation]RSQSRSRYYRQR(QRSRRRRRRS(C)[Carbamidomethylation]QTR)[80.1844]RRAMR(C)[Carbamidomethylation](C)[Carbamidomethylation]RPRYRPR(C)[Carbamidomethylation]RRH.		2	51	[]	[]	[]	[]		4.86577	TP-019	0	P|002	7108.86	79.2658	P1	P1 +1ph	+1ph	P1	P|002 → P1 +1ph
A	R02	A_R02	TP	136	1283000000	30.2569	0.093331	4.0795	7109.57	79.9758	79.9758	P04553	P1	['P1']	ARYRCCRSQSRSRYYRQRQRSRRRRRRSCQTRRRAMRCCRPRYRPRCRRH	M.ARYR(C)[Carbamidomethylation](C)[Carbamidomethylation]RSQ(S)[Phospho]RSRYYRQRQRSRRRRRRS(C)[Carbamidomethylation]QTRRRAMR(C)[Carbamidomethylation](C)[Carbamidomethylation]RPRYRPR(C)[Carbamidomethylation]RRH.	Phospho[S11:88.3%]	2	51	['S']	[11]	[11]	[88.3]		13.5031	TP-019	1	P|002	7108.86	79.2658	P1	P1 +1ph	+1ph	P1	P|002 → P1 +1ph
A	R02	A_R02	TP	55	1283000000	30.2569	0.093331	1.62633	7109.57	79.9758	79.9758	P04553	P1	['P1']	ARYRCCRSQSRSRYYRQRQRSRRRRRRSCQTRRRAMRCCRPRYRPRCRRH	M.ARYR(C)[Carbamidomethylation](C)[Carbamidomethylation]RS(QSRSRYYRQR)[80.1858]QRSRRRRRRS(C)[Carbamidomethylation]QTRRRAMR(C)[Carbamidomethylation](C)[Carbamidomethylation]RPRYRPR(C)[Carbamidomethylation]RRH.		2	51	[]	[]	[]	[]		8.20025	TP-019	0	P|002	7108.86	79.2658	P1	P1 +1ph	+1ph	P1	P|002 → P1 +1ph
B	R03	B_R03	TP	32	2667000000	31.3126	0.580452	0.928167	7109.57	79.9767	79.9767	P04553	P1	['P1']	ARYRCCRSQSRSRYYRQRQRSRRRRRRSCQTRRRAMRCCRPRYRPRCRRH	M.ARYR(C)[Carbamidomethylation](C)[Carbamidomethylation]RSQ(SRSRYYRQRQRSRRRRRRS)[Phospho](C)[Carbamidomethylation]QTRRRAMR(C)[Carbamidomethylation](C)[Carbamidomethylation]RPRYRPR(C)[Carbamidomethylation]RRH.	Phospho[S11:16.6%;S13:16.6%;Y15:16.6%;Y16:16.6%;S22:16.6%;S29:16.6%]	2	51	['S', 'S', 'Y', 'Y', 'S', 'S']	[11, 13, 15, 16, 22, 29]	[11, 13, 15, 16, 22, 29]	[16.6, 16.6, 16.6, 16.6, 16.6, 16.6]		12.7253	TP-019	1	P|002	7108.86	79.2658	P1	P1 +1ph	+1ph	P1	P|002 → P1 +1ph
B	R03	B_R03	TP	283	2667000000	31.3126	0.580452	8.44933	7109.58	79.9795	79.9795	P04553	P1	['P1']	ARYRCCRSQSRSRYYRQRQRSRRRRRRSCQTRRRAMRCCRPRYRPRCRRH	M.ARYR(C)[Carbamidomethylation](C)[Carbamidomethylation]RSQSR(S)[Phospho]RYYRQRQRSRRRRRRS(C)[Carbamidomethylation]QTRRRAMR(C)[Carbamidomethylation](C)[Carbamidomethylation]RPRYRPR(C)[Carbamidomethylation]RRH.	Phospho[S13:95.6%]	2	51	['S']	[13]	[13]	[95.6]		31.5642	TP-019	1	P|002	7108.86	79.2658	P1	P1 +1ph	+1ph	P1	P|002 → P1 +1ph
B	R03	B_R03	TP	339	2667000000	31.3126	0.580452	10.0272	7109.58	79.9798	79.9798	P04553	P1	['P1']	ARYRCCRSQSRSRYYRQRQRSRRRRRRSCQTRRRAMRCCRPRYRPRCRRH	M.ARYR(C)[Carbamidomethylation](C)[Carbamidomethylation]RSQ(SRS)[Phospho]RYYRQRQRSRRRRRRS(C)[Carbamidomethylation]QTRRRAMR(C)[Carbamidomethylation](C)[Carbamidomethylation]RPRYRPR(C)[Carbamidomethylation]RRH.	Phospho[S11:49.9%;S13:49.9%]	2	51	['S', 'S']	[11, 13]	[11, 13]	[49.9, 49.9]		27.3309	TP-019	1	P|002	7108.86	79.2658	P1	P1 +1ph	+1ph	P1	P|002 → P1 +1ph
A	R01	A_R01	TP	368	400800000	28.5783	-0.657473	10.7002	7109.58	79.9798	79.9798	P04553	P1	['P1']	ARYRCCRSQSRSRYYRQRQRSRRRRRRSCQTRRRAMRCCRPRYRPRCRRH	M.ARYR(C)[Carbamidomethylation](C)[Carbamidomethylation]RSQ(S)[Phospho]RSRYYRQRQRSRRRRRRS(C)[Carbamidomethylation]QTRRRAMR(C)[Carbamidomethylation](C)[Carbamidomethylation]RPRYRPR(C)[Carbamidomethylation]RRH.	Phospho[S11:99.8%]	2	51	['S']	[11]	[11]	[99.8]		33.4715	TP-019	1	P|002	7108.86	79.2658	P1	P1 +1ph	+1ph	P1	P|002 → P1 +1ph
B	R03	B_R03	TP	361	2667000000	31.3126	0.580452	10.6372	7109.58	79.981	79.981	P04553	P1	['P1']	ARYRCCRSQSRSRYYRQRQRSRRRRRRSCQTRRRAMRCCRPRYRPRCRRH	M.ARYR(C)[Carbamidomethylation](C)[Carbamidomethylation]RSQ(SRS)[Phospho]RYYRQRQRSRRRRRRS(C)[Carbamidomethylation]QTRRRAMR(C)[Carbamidomethylation](C)[Carbamidomethylation]RPRYRPR(C)[Carbamidomethylation]RRH.	Phospho[S11:50.0%;S13:50.0%]	2	51	['S', 'S']	[11, 13]	[11, 13]	[50.0, 50.0]		29.3265	TP-019	1	P|002	7108.86	79.2658	P1	P1 +1ph	+1ph	P1	P|002 → P1 +1ph
B	R03	B_R03	TP	303	2667000000	31.3126	0.580452	9.02	7109.58	79.9813	79.9813	P04553	P1	['P1']	ARYRCCRSQSRSRYYRQRQRSRRRRRRSCQTRRRAMRCCRPRYRPRCRRH	M.ARYR(C)[Carbamidomethylation](C)[Carbamidomethylation]RSQSR(SRY)[Phospho]YRQRQRSRRRRRRS(C)[Carbamidomethylation]QTRRRAMR(C)[Carbamidomethylation](C)[Carbamidomethylation]RPRYRPR(C)[Carbamidomethylation]RRH.	Phospho[S13:48.9%;Y15:48.9%]	2	51	['S', 'Y']	[13, 15]	[13, 15]	[48.9, 48.9]		29.7169	TP-019	1	P|002	7108.86	79.2658	P1	P1 +1ph	+1ph	P1	P|002 → P1 +1ph
B	R03	B_R03	TP	395	2667000000	31.3126	0.580452	11.6148	7109.58	79.9817	79.9817	P04553	P1	['P1']	ARYRCCRSQSRSRYYRQRQRSRRRRRRSCQTRRRAMRCCRPRYRPRCRRH	M.ARYR(C)[Carbamidomethylation](C)[Carbamidomethylation]RSQSR(S)[Phospho]RYYRQRQRSRRRRRRS(C)[Carbamidomethylation]QTRRRAMR(C)[Carbamidomethylation](C)[Carbamidomethylation]RPRYRPR(C)[Carbamidomethylation]RRH.	Phospho[S13:95.8%]	2	51	['S']	[13]	[13]	[95.8]		31.8638	TP-019	1	P|002	7108.86	79.2658	P1	P1 +1ph	+1ph	P1	P|002 → P1 +1ph
B	R03	B_R03	TP	315	2667000000	31.3126	0.580452	9.3595	7109.58	79.9818	79.9818	P04553	P1	['P1']	ARYRCCRSQSRSRYYRQRQRSRRRRRRSCQTRRRAMRCCRPRYRPRCRRH	M.ARYR(C)[Carbamidomethylation](C)[Carbamidomethylation]RSQSR(S)[Phospho]RYYRQRQRSRRRRRRS(C)[Carbamidomethylation]QTRRRAMR(C)[Carbamidomethylation](C)[Carbamidomethylation]RPRYRPR(C)[Carbamidomethylation]RRH.	Phospho[S13:95.8%]	2	51	['S']	[13]	[13]	[95.8]		30.123	TP-019	1	P|002	7108.86	79.2658	P1	P1 +1ph	+1ph	P1	P|002 → P1 +1ph
A	R01	A_R01	TP	422	400800000	28.5783	-0.657473	12.2277	7109.58	79.9822	79.9822	P04553	P1	['P1']	ARYRCCRSQSRSRYYRQRQRSRRRRRRSCQTRRRAMRCCRPRYRPRCRRH	M.ARYR(C)[Carbamidomethylation](C)[Carbamidomethylation]RSQ(S)[Phospho]RSRYYRQRQRSRRRRRRS(C)[Carbamidomethylation]QTRRRAMR(C)[Carbamidomethylation](C)[Carbamidomethylation]RPRYRPR(C)[Carbamidomethylation]RRH.	Phospho[S11:99.9%]	2	51	['S']	[11]	[11]	[99.9]		32.345	TP-019	1	P|002	7108.86	79.2658	P1	P1 +1ph	+1ph	P1	P|002 → P1 +1ph
B	R03	B_R03	TP	423	2667000000	31.3126	0.580452	12.4265	7109.58	79.9827	79.9827	P04553	P1	['P1']	ARYRCCRSQSRSRYYRQRQRSRRRRRRSCQTRRRAMRCCRPRYRPRCRRH	M.ARYR(C)[Carbamidomethylation](C)[Carbamidomethylation]RSQ(S)[Phospho]RSRYYRQRQRSRRRRRRS(C)[Carbamidomethylation]QTRRRAMR(C)[Carbamidomethylation](C)[Carbamidomethylation]RPRYRPR(C)[Carbamidomethylation]RRH.	Phospho[S11:95.6%]	2	51	['S']	[11]	[11]	[95.6]		34.1193	TP-019	1	P|002	7108.86	79.2658	P1	P1 +1ph	+1ph	P1	P|002 → P1 +1ph
B	R03	B_R03	TP	403	2667000000	31.3126	0.580452	11.8448	7109.58	79.9828	79.9828	P04553	P1	['P1']	ARYRCCRSQSRSRYYRQRQRSRRRRRRSCQTRRRAMRCCRPRYRPRCRRH	M.ARYR(C)[Carbamidomethylation](C)[Carbamidomethylation]RSQ(SRS)[Phospho]RYYRQRQRSRRRRRRS(C)[Carbamidomethylation]QTRRRAMR(C)[Carbamidomethylation](C)[Carbamidomethylation]RPRYRPR(C)[Carbamidomethylation]RRH.	Phospho[S11:49.9%;S13:49.9%]	2	51	['S', 'S']	[11, 13]	[11, 13]	[49.9, 49.9]		31.3295	TP-019	1	P|002	7108.86	79.2658	P1	P1 +1ph	+1ph	P1	P|002 → P1 +1ph
B	R03	B_R03	TP	347	2667000000	31.3126	0.580452	10.2502	7109.58	79.984	79.984	P04553	P1	['P1']	ARYRCCRSQSRSRYYRQRQRSRRRRRRSCQTRRRAMRCCRPRYRPRCRRH	M.ARYR(C)[Carbamidomethylation](C)[Carbamidomethylation]RSQ(S)[Phospho]RSRYYRQRQRSRRRRRRS(C)[Carbamidomethylation]QTRRRAMR(C)[Carbamidomethylation](C)[Carbamidomethylation]RPRYRPR(C)[Carbamidomethylation]RRH.	Phospho[S11:95.6%]	2	51	['S']	[11]	[11]	[95.6]		33.1903	TP-019	1	P|002	7108.86	79.2658	P1	P1 +1ph	+1ph	P1	P|002 → P1 +1ph
A	R02	A_R02	TP	389	1283000000	30.2569	0.093331	11.5263	7109.58	79.9851	79.9851	P04553	P1	['P1']	ARYRCCRSQSRSRYYRQRQRSRRRRRRSCQTRRRAMRCCRPRYRPRCRRH	M.ARYR(C)[Carbamidomethylation](C)[Carbamidomethylation]RSQ(S)[Phospho]RSRYYRQRQRSRRRRRRS(C)[Carbamidomethylation]QTRRRAMR(C)[Carbamidomethylation](C)[Carbamidomethylation]RPRYRPR(C)[Carbamidomethylation]RRH.	Phospho[S11:99.8%]	2	51	['S']	[11]	[11]	[99.8]		29.2003	TP-019	1	P|002	7108.86	79.2658	P1	P1 +1ph	+1ph	P1	P|002 → P1 +1ph
A	R02	A_R02	PS	795	20873.7	14.3494	-0.872678	22.9434	7109.58	79.9852	79.9852	Sperm protamine P1	P1	['P1']	ARYRCCRSQSRSRYYRQRQRSRRRRRRSCQTRRRAMRCCRPRYRPRCRRH	ARYRccRSQsRSRYYRQRQRSRRRRRRScQTRRRAMRccRPRYRPRcRRH	C5(Carbamidomethyl); C6(Carbamidomethyl); S10(O-phospho-L-serine); C29(Carbamidomethyl); C38(Carbamidomethyl); C39(Carbamidomethyl); C47(Carbamidomethyl)	2	51	['S']	[10]	[11]	[]	51.1011	56.3	PS-075	1	P|002	7108.86	79.2658	P1	P1 +1ph	+1ph	P1	P|002 → P1 +1ph
A	R02	A_R02	TP	367	1283000000	30.2569	0.093331	10.8908	7109.58	79.9857	79.9857	P04553	P1	['P1']	ARYRCCRSQSRSRYYRQRQRSRRRRRRSCQTRRRAMRCCRPRYRPRCRRH	M.ARYR(C)[Carbamidomethylation](C)[Carbamidomethylation]RSQ(S)[Phospho]RSRYYRQRQRSRRRRRRS(C)[Carbamidomethylation]QTRRRAMR(C)[Carbamidomethylation](C)[Carbamidomethylation]RPRYRPR(C)[Carbamidomethylation]RRH.	Phospho[S11:99.9%]	2	51	['S']	[11]	[11]	[99.9]		34.0025	TP-019	1	P|002	7108.86	79.2658	P1	P1 +1ph	+1ph	P1	P|002 → P1 +1ph
A	R02	A_R02	TP	429	1283000000	30.2569	0.093331	12.697	7109.58	79.9858	79.9858	P04553	P1	['P1']	ARYRCCRSQSRSRYYRQRQRSRRRRRRSCQTRRRAMRCCRPRYRPRCRRH	M.ARYR(C)[Carbamidomethylation](C)[Carbamidomethylation]RSQ(S)[Phospho]RSRYYRQRQRSRRRRRRS(C)[Carbamidomethylation]QTRRRAMR(C)[Carbamidomethylation](C)[Carbamidomethylation]RPRYRPR(C)[Carbamidomethylation]RRH.	Phospho[S11:95.8%]	2	51	['S']	[11]	[11]	[95.8]		25.4222	TP-019	1	P|002	7108.86	79.2658	P1	P1 +1ph	+1ph	P1	P|002 → P1 +1ph
B	R03	B_R03	TP	166	2667000000	31.3126	0.580452	4.961	7109.58	79.9861	79.9861	P04553	P1	['P1']	ARYRCCRSQSRSRYYRQRQRSRRRRRRSCQTRRRAMRCCRPRYRPRCRRH	M.ARYR(C)[Carbamidomethylation](C)[Carbamidomethylation]RSQ(SRS)[Phospho]RYYRQRQRSRRRRRRS(C)[Carbamidomethylation]QTRRRAMR(C)[Carbamidomethylation](C)[Carbamidomethylation]RPRYRPR(C)[Carbamidomethylation]RRH.	Phospho[S11:48.9%;S13:48.9%]	2	51	['S', 'S']	[11, 13]	[11, 13]	[48.9, 48.9]		18.16	TP-019	1	P|002	7108.86	79.2658	P1	P1 +1ph	+1ph	P1	P|002 → P1 +1ph
B	R03	B_R03	TP	275	2667000000	31.3126	0.580452	8.227	7109.58	79.9866	79.9866	P04553	P1	['P1']	ARYRCCRSQSRSRYYRQRQRSRRRRRRSCQTRRRAMRCCRPRYRPRCRRH	M.ARYR(C)[Carbamidomethylation](C)[Carbamidomethylation]RSQSR(S)[Phospho]RYYRQRQRSRRRRRRS(C)[Carbamidomethylation]QTRRRAMR(C)[Carbamidomethylation](C)[Carbamidomethylation]RPRYRPR(C)[Carbamidomethylation]RRH.	Phospho[S13:95.5%]	2	51	['S']	[13]	[13]	[95.5]		28.5115	TP-019	1	P|002	7108.86	79.2658	P1	P1 +1ph	+1ph	P1	P|002 → P1 +1ph
B	R03	B_R03	TP	80	2667000000	31.3126	0.580452	2.36667	7109.58	79.9867	79.9867	P04553	P1	['P1']	ARYRCCRSQSRSRYYRQRQRSRRRRRRSCQTRRRAMRCCRPRYRPRCRRH	M.ARYR(C)[Carbamidomethylation](C)[Carbamidomethylation]RSQ(SRS)[Phospho]RYYRQRQRSRRRRRRS(C)[Carbamidomethylation]QTRRRAMR(C)[Carbamidomethylation](C)[Carbamidomethylation]RPRYRPR(C)[Carbamidomethylation]RRH.	Phospho[S11:49.9%;S13:49.9%]	2	51	['S', 'S']	[11, 13]	[11, 13]	[49.9, 49.9]		22.4612	TP-019	1	P|002	7108.86	79.2658	P1	P1 +1ph	+1ph	P1	P|002 → P1 +1ph
A	R02	A_R02	TP	409	1283000000	30.2569	0.093331	12.1133	7109.58	79.9868	79.9868	P04553	P1	['P1']	ARYRCCRSQSRSRYYRQRQRSRRRRRRSCQTRRRAMRCCRPRYRPRCRRH	M.ARYR(C)[Carbamidomethylation](C)[Carbamidomethylation]RSQ(S)[Phospho]RSRYYRQRQRSRRRRRRS(C)[Carbamidomethylation]QTRRRAMR(C)[Carbamidomethylation](C)[Carbamidomethylation]RPRYRPR(C)[Carbamidomethylation]RRH.	Phospho[S11:99.8%]	2	51	['S']	[11]	[11]	[99.8]		32.4667	TP-019	1	P|002	7108.86	79.2658	P1	P1 +1ph	+1ph	P1	P|002 → P1 +1ph
B	R03	B_R03	TP	449	2667000000	31.3126	0.580452	13.1897	7109.58	79.9868	79.9868	P04553	P1	['P1']	ARYRCCRSQSRSRYYRQRQRSRRRRRRSCQTRRRAMRCCRPRYRPRCRRH	M.ARYR(C)[Carbamidomethylation](C)[Carbamidomethylation]RSQSR(S)[Phospho]RYYRQRQRSRRRRRRS(C)[Carbamidomethylation]QTRRRAMR(C)[Carbamidomethylation](C)[Carbamidomethylation]RPRYRPR(C)[Carbamidomethylation]RRH.	Phospho[S13:95.6%]	2	51	['S']	[13]	[13]	[95.6]		27.6646	TP-019	1	P|002	7108.86	79.2658	P1	P1 +1ph	+1ph	P1	P|002 → P1 +1ph
B	R03	B_R03	TP	56	2667000000	31.3126	0.580452	1.64333	7109.58	79.9869	79.9869	P04553	P1	['P1']	ARYRCCRSQSRSRYYRQRQRSRRRRRRSCQTRRRAMRCCRPRYRPRCRRH	M.ARYR(C)[Carbamidomethylation](C)[Carbamidomethylation]RSQ(SRSRY)[Phospho]YRQRQRSRRRRRRS(C)[Carbamidomethylation]QTRRRAMR(C)[Carbamidomethylation](C)[Carbamidomethylation]RPRYRPR(C)[Carbamidomethylation]RRH.	Phospho[S11:33.3%;S13:33.3%;Y15:33.3%]	2	51	['S', 'S', 'Y']	[11, 13, 15]	[11, 13, 15]	[33.3, 33.3, 33.3]		17.961	TP-019	1	P|002	7108.86	79.2658	P1	P1 +1ph	+1ph	P1	P|002 → P1 +1ph
B	R03	B_R03	TP	207	2667000000	31.3126	0.580452	6.1985	7109.58	79.9874	79.9874	P04553	P1	['P1']	ARYRCCRSQSRSRYYRQRQRSRRRRRRSCQTRRRAMRCCRPRYRPRCRRH	M.ARYR(C)[Carbamidomethylation](C)[Carbamidomethylation]RSQ(SRS)[Phospho]RYYRQRQRSRRRRRRS(C)[Carbamidomethylation]QTRRRAMR(C)[Carbamidomethylation](C)[Carbamidomethylation]RPRYRPR(C)[Carbamidomethylation]RRH.	Phospho[S11:48.8%;S13:48.8%]	2	51	['S', 'S']	[11, 13]	[11, 13]	[48.8, 48.8]		21.5722	TP-019	1	P|002	7108.86	79.2658	P1	P1 +1ph	+1ph	P1	P|002 → P1 +1ph
A	R01	A_R01	TP	432	400800000	28.5783	-0.657473	12.5167	7109.58	79.9881	79.9881	P04553	P1	['P1']	ARYRCCRSQSRSRYYRQRQRSRRRRRRSCQTRRRAMRCCRPRYRPRCRRH	M.ARYR(C)[Carbamidomethylation](C)[Carbamidomethylation]RSQ(SRS)[Phospho]RYYRQRQRSRRRRRRS(C)[Carbamidomethylation]QTRRRAMR(C)[Carbamidomethylation](C)[Carbamidomethylation]RPRYRPR(C)[Carbamidomethylation]RRH.	Phospho[S11:50.0%;S13:50.0%]	2	51	['S', 'S']	[11, 13]	[11, 13]	[50.0, 50.0]		29.4172	TP-019	1	P|002	7108.86	79.2658	P1	P1 +1ph	+1ph	P1	P|002 → P1 +1ph
B	R03	B_R03	TP	82	2667000000	31.3126	0.580452	2.42717	7109.58	79.9883	79.9883	P04553	P1	['P1']	ARYRCCRSQSRSRYYRQRQRSRRRRRRSCQTRRRAMRCCRPRYRPRCRRH	M.ARYR(C)[Carbamidomethylation](C)[Carbamidomethylation]RSQ(SRS)[Phospho]RYYRQRQRSRRRRRRS(C)[Carbamidomethylation]QTRRRAMR(C)[Carbamidomethylation](C)[Carbamidomethylation]RPRYRPR(C)[Carbamidomethylation]RRH.	Phospho[S11:47.8%;S13:47.8%]	2	51	['S', 'S']	[11, 13]	[11, 13]	[47.8, 47.8]		23.1222	TP-019	1	P|002	7108.86	79.2658	P1	P1 +1ph	+1ph	P1	P|002 → P1 +1ph
B	R03	B_R03	TP	363	2667000000	31.3126	0.580452	10.6955	7109.58	79.989	79.989	P04553	P1	['P1']	ARYRCCRSQSRSRYYRQRQRSRRRRRRSCQTRRRAMRCCRPRYRPRCRRH	M.ARYR(C)[Carbamidomethylation](C)[Carbamidomethylation]RSQ(S)[Phospho]RSRYYRQRQRSRRRRRRS(C)[Carbamidomethylation]QTRRRAMR(C)[Carbamidomethylation](C)[Carbamidomethylation]RPRYRPR(C)[Carbamidomethylation]RRH.	Phospho[S11:95.8%]	2	51	['S']	[11]	[11]	[95.8]		29.4403	TP-019	1	P|002	7108.86	79.2658	P1	P1 +1ph	+1ph	P1	P|002 → P1 +1ph
A	R01	A_R01	TP	384	400800000	28.5783	-0.657473	11.1452	7109.59	79.9894	79.9894	P04553	P1	['P1']	ARYRCCRSQSRSRYYRQRQRSRRRRRRSCQTRRRAMRCCRPRYRPRCRRH	M.ARYR(C)[Carbamidomethylation](C)[Carbamidomethylation]RSQ(S)[Phospho]RSRYYRQRQRSRRRRRRS(C)[Carbamidomethylation]QTRRRAMR(C)[Carbamidomethylation](C)[Carbamidomethylation]RPRYRPR(C)[Carbamidomethylation]RRH.	Phospho[S11:95.8%]	2	51	['S']	[11]	[11]	[95.8]		26.9266	TP-019	1	P|002	7108.86	79.2658	P1	P1 +1ph	+1ph	P1	P|002 → P1 +1ph
A	R01	A_R01	TP	302	400800000	28.5783	-0.657473	8.91867	7109.59	79.9905	79.9905	P04553	P1	['P1']	ARYRCCRSQSRSRYYRQRQRSRRRRRRSCQTRRRAMRCCRPRYRPRCRRH	M.ARYR(C)[Carbamidomethylation](C)[Carbamidomethylation]RSQ(SRS)[Phospho]RYYRQRQRSRRRRRRS(C)[Carbamidomethylation]QTRRRAMR(C)[Carbamidomethylation](C)[Carbamidomethylation]RPRYRPR(C)[Carbamidomethylation]RRH.	Phospho[S11:50.0%;S13:50.0%]	2	51	['S', 'S']	[11, 13]	[11, 13]	[50.0, 50.0]		29.8062	TP-019	1	P|002	7108.86	79.2658	P1	P1 +1ph	+1ph	P1	P|002 → P1 +1ph
B	R03	B_R03	TP	341	2667000000	31.3126	0.580452	10.0828	7109.59	79.9906	79.9906	P04553	P1	['P1']	ARYRCCRSQSRSRYYRQRQRSRRRRRRSCQTRRRAMRCCRPRYRPRCRRH	M.ARYR(C)[Carbamidomethylation](C)[Carbamidomethylation]RSQ(S)[Phospho]RSRYYRQRQRSRRRRRRS(C)[Carbamidomethylation]QTRRRAMR(C)[Carbamidomethylation](C)[Carbamidomethylation]RPRYRPR(C)[Carbamidomethylation]RRH.	Phospho[S11:95.8%]	2	51	['S']	[11]	[11]	[95.8]		28.8488	TP-019	1	P|002	7108.86	79.2658	P1	P1 +1ph	+1ph	P1	P|002 → P1 +1ph
A	R02	A_R02	TP	39	1283000000	30.2569	0.093331	1.14367	7109.59	79.9906	79.9906	P04553	P1	['P1']	ARYRCCRSQSRSRYYRQRQRSRRRRRRSCQTRRRAMRCCRPRYRPRCRRH	M.ARYR(C)[Carbamidomethylation](C)[Carbamidomethylation]RSQSRSRYYRQRQRSRRRRR(RS(C)[Carbamidomethylation])[80.2006]QTRRRAMR(C)[Carbamidomethylation](C)[Carbamidomethylation]RPRYRPR(C)[Carbamidomethylation]RRH.		2	51	[]	[]	[]	[]		22.0152	TP-019	0	P|002	7108.86	79.2658	P1	P1 +1ph	+1ph	P1	P|002 → P1 +1ph
B	R04	B_R04	TP	769	410300000	28.6121	-0.808773	21.382	7109.59	79.9907	79.9907	P04553	P1	['P1']	ARYRCCRSQSRSRYYRQRQRSRRRRRRSCQTRRRAMRCCRPRYRPRCRRH	M.ARYR(C)[Carbamidomethylation](C)[Carbamidomethylation]RSQ(S)[Phospho]RSRYYRQRQRSRRRRRRS(C)[Carbamidomethylation]QTRRRAMR(C)[Carbamidomethylation](C)[Carbamidomethylation]RPRYRPR(C)[Carbamidomethylation]RRH.	Phospho[S11:95.8%]	2	51	['S']	[11]	[11]	[95.8]		28.589	TP-019	1	P|002	7108.86	79.2658	P1	P1 +1ph	+1ph	P1	P|002 → P1 +1ph
B	R03	B_R03	TP	409	2667000000	31.3126	0.580452	12.017	7109.59	79.991	79.991	P04553	P1	['P1']	ARYRCCRSQSRSRYYRQRQRSRRRRRRSCQTRRRAMRCCRPRYRPRCRRH	M.ARYR(C)[Carbamidomethylation](C)[Carbamidomethylation]RSQSR(S)[Phospho]RYYRQRQRSRRRRRRS(C)[Carbamidomethylation]QTRRRAMR(C)[Carbamidomethylation](C)[Carbamidomethylation]RPRYRPR(C)[Carbamidomethylation]RRH.	Phospho[S13:95.8%]	2	51	['S']	[13]	[13]	[95.8]		28.335	TP-019	1	P|002	7108.86	79.2658	P1	P1 +1ph	+1ph	P1	P|002 → P1 +1ph
B	R03	B_R03	TP	429	2667000000	31.3126	0.580452	12.605	7109.59	79.9912	79.9912	P04553	P1	['P1']	ARYRCCRSQSRSRYYRQRQRSRRRRRRSCQTRRRAMRCCRPRYRPRCRRH	M.ARYR(C)[Carbamidomethylation](C)[Carbamidomethylation]RSQ(SRS)[Phospho]RYYRQRQRSRRRRRRS(C)[Carbamidomethylation]QTRRRAMR(C)[Carbamidomethylation](C)[Carbamidomethylation]RPRYRPR(C)[Carbamidomethylation]RRH.	Phospho[S11:49.9%;S13:49.9%]	2	51	['S', 'S']	[11, 13]	[11, 13]	[49.9, 49.9]		29.2308	TP-019	1	P|002	7108.86	79.2658	P1	P1 +1ph	+1ph	P1	P|002 → P1 +1ph
A	R02	A_R02	TP	187	1283000000	30.2569	0.093331	5.6175	7109.59	79.9917	79.9917	P04553	P1	['P1']	ARYRCCRSQSRSRYYRQRQRSRRRRRRSCQTRRRAMRCCRPRYRPRCRRH	M.ARYR(C)[Carbamidomethylation](C)[Carbamidomethylation]RSQSRSRYYRQRQRSRRRR(R)[80.2017]RS(C)[Carbamidomethylation]QTRRRAMR(C)[Carbamidomethylation](C)[Carbamidomethylation]RPRYRPR(C)[Carbamidomethylation]RRH.		2	51	[]	[]	[]	[]		21.5186	TP-019	0	P|002	7108.86	79.2658	P1	P1 +1ph	+1ph	P1	P|002 → P1 +1ph
A	R01	A_R01	TP	412	400800000	28.5783	-0.657473	11.9367	7109.59	79.9918	79.9918	P04553	P1	['P1']	ARYRCCRSQSRSRYYRQRQRSRRRRRRSCQTRRRAMRCCRPRYRPRCRRH	M.ARYR(C)[Carbamidomethylation](C)[Carbamidomethylation]RSQ(S)[Phospho]RSRYYRQRQRSRRRRRRS(C)[Carbamidomethylation]QTRRRAMR(C)[Carbamidomethylation](C)[Carbamidomethylation]RPRYRPR(C)[Carbamidomethylation]RRH.	Phospho[S11:95.8%]	2	51	['S']	[11]	[11]	[95.8]		27.7642	TP-019	1	P|002	7108.86	79.2658	P1	P1 +1ph	+1ph	P1	P|002 → P1 +1ph
B	R03	B_R03	TP	35	2667000000	31.3126	0.580452	1.01717	7109.59	79.9918	79.9918	P04553	P1	['P1']	ARYRCCRSQSRSRYYRQRQRSRRRRRRSCQTRRRAMRCCRPRYRPRCRRH	M.ARYR(C)[Carbamidomethylation](C)[Carbamidomethylation]RSQSRSRYYRQRQRS(RRRRRRS(C)[Carbamidomethylation]Q)[80.2018]TRRRAMR(C)[Carbamidomethylation](C)[Carbamidomethylation]RPRYRPR(C)[Carbamidomethylation]RRH.		2	51	[]	[]	[]	[]		15.2474	TP-019	0	P|002	7108.86	79.2658	P1	P1 +1ph	+1ph	P1	P|002 → P1 +1ph
B	R03	B_R03	PS	421	306335	18.2248	0.748731	12.368	7109.59	79.9943	79.9943	Sperm protamine P1	P1	['P1']	ARYRCCRSQSRSRYYRQRQRSRRRRRRSCQTRRRAMRCCRPRYRPRCRRH	ARYRccRSQsRSRYYRQRQRSRRRRRRScQTRRRAMRccRPRYRPRcRRH	C5(Carbamidomethyl); C6(Carbamidomethyl); S10(O-phospho-L-serine); C29(Carbamidomethyl); C38(Carbamidomethyl); C39(Carbamidomethyl); C47(Carbamidomethyl)	2	51	['S']	[10]	[11]	[]	31.0026	115.14	PS-075	1	P|002	7108.86	79.2658	P1	P1 +1ph	+1ph	P1	P|002 → P1 +1ph
B	R03	B_R03	PS	449	555073	19.0823	1.08124	13.1897	7109.59	79.998	79.998	Sperm protamine P1	P1	['P1']	ARYRCCRSQSRSRYYRQRQRSRRRRRRSCQTRRRAMRCCRPRYRPRCRRH	ARYRccRSQsRSRYYRQRQRSRRRRRRScQTRRRAMRccRPRYRPRcRRH	C5(Carbamidomethyl); C6(Carbamidomethyl); S10(O-phospho-L-serine); C29(Carbamidomethyl); C38(Carbamidomethyl); C39(Carbamidomethyl); C47(Carbamidomethyl)	2	51	['S']	[10]	[11]	[]	38.1316	110.2	PS-075	1	P|002	7108.86	79.2658	P1	P1 +1ph	+1ph	P1	P|002 → P1 +1ph
B	R03	B_R03	TP	235	2667000000	31.3126	0.580452	7.03983	7109.59	79.9987	79.9987	P04553	P1	['P1']	ARYRCCRSQSRSRYYRQRQRSRRRRRRSCQTRRRAMRCCRPRYRPRCRRH	M.ARYR(C)[Carbamidomethylation](C)[Carbamidomethylation]RSQ(SRSRYY)[Phospho]RQRQRSRRRRRRS(C)[Carbamidomethylation]QTRRRAMR(C)[Carbamidomethylation](C)[Carbamidomethylation]RPRYRPR(C)[Carbamidomethylation]RRH.	Phospho[S11:24.2%;S13:24.2%;Y15:24.2%;Y16:24.2%]	2	51	['S', 'S', 'Y', 'Y']	[11, 13, 15, 16]	[11, 13, 15, 16]	[24.2, 24.2, 24.2, 24.2]		10.1674	TP-019	1	P|002	7108.86	79.2658	P1	P1 +1ph	+1ph	P1	P|002 → P1 +1ph
B	R03	B_R03	TP	52	2667000000	31.3126	0.580452	1.52267	7109.6	79.9998	79.9998	P04553	P1	['P1']	ARYRCCRSQSRSRYYRQRQRSRRRRRRSCQTRRRAMRCCRPRYRPRCRRH	M.ARYR(C)[Carbamidomethylation](C)[Carbamidomethylation]RSQSR(SRY)[Phospho]YRQRQRSRRRRRRS(C)[Carbamidomethylation]QTRRRAMR(C)[Carbamidomethylation](C)[Carbamidomethylation]RPRYRPR(C)[Carbamidomethylation]RRH.	Phospho[S13:46.9%;Y15:46.9%]	2	51	['S', 'Y']	[13, 15]	[13, 15]	[46.9, 46.9]		15.5964	TP-019	1	P|002	7108.86	79.2658	P1	P1 +1ph	+1ph	P1	P|002 → P1 +1ph
A	R02	A_R02	TP	35	1283000000	30.2569	0.093331	1.0225	7109.6	80.0001	80.0001	P04553	P1	['P1']	ARYRCCRSQSRSRYYRQRQRSRRRRRRSCQTRRRAMRCCRPRYRPRCRRH	M.ARYR(C)[Carbamidomethylation](C)[Carbamidomethylation]RSQ(SRS)[Phospho]RYYRQRQRSRRRRRRS(C)[Carbamidomethylation]QTRRRAMR(C)[Carbamidomethylation](C)[Carbamidomethylation]RPRYRPR(C)[Carbamidomethylation]RRH.	Phospho[S11:46.8%;S13:46.8%]	2	51	['S', 'S']	[11, 13]	[11, 13]	[46.8, 46.8]		12.215	TP-019	1	P|002	7108.86	79.2658	P1	P1 +1ph	+1ph	P1	P|002 → P1 +1ph
B	R03	B_R03	PS	82	17071.7	14.0593	-0.86634	2.4271	7109.6	80.0017	80.0017	Sperm protamine P1	P1	['P1']	ARYRCCRSQSRSRYYRQRQRSRRRRRRSCQTRRRAMRCCRPRYRPRCRRH	ARYRccRSQsRSRYYRQRQRSRRRRRRScQTRRRAMRccRPRYRPRcRRH	C5(Carbamidomethyl); C6(Carbamidomethyl); S10(O-phospho-L-serine); C29(Carbamidomethyl); C38(Carbamidomethyl); C39(Carbamidomethyl); C47(Carbamidomethyl)	2	51	['S']	[10]	[11]	[]	72.7133	44.87	PS-075	1	P|002	7108.86	79.2658	P1	P1 +1ph	+1ph	P1	P|002 → P1 +1ph
B	R04	B_R04	TP	1255	410300000	28.6121	-0.808773	35.5722	7110.57	80.9725	80.9725	P04553	P1	['P1']	ARYRCCRSQSRSRYYRQRQRSRRRRRRSCQTRRRAMRCCRPRYRPRCRRH	M.ARYR(C)[Carbamidomethylation](C)[Carbamidomethylation]RSQSR(S)[Phospho]RYYRQRQRSRRRRRRS(C)[Carbamidomethylation]QTRRRAMR(C)[Carbamidomethylation](C)[Carbamidomethylation]RPRYRPR(C)[Carbamidomethylation]RRH.	Phospho[S13:95.6%]	2	51	['S']	[13]	[13]	[95.6]		18.2044	TP-019	1	P|002	7108.86	79.2658	P1	P1 +1ph	+1ph	P1	P|002 → P1 +1ph
B	R03	B_R03	TP	195	2667000000	31.3126	0.580452	5.83583	7110.57	80.9752	80.9752	P04553	P1	['P1']	ARYRCCRSQSRSRYYRQRQRSRRRRRRSCQTRRRAMRCCRPRYRPRCRRH	M.ARYR(C)[Carbamidomethylation](C)[Carbamidomethylation]RSQSRSRYYR(QR)[81.1851]QRSRRRRRRS(C)[Carbamidomethylation]QTRRRAMR(C)[Carbamidomethylation](C)[Carbamidomethylation]RPRYRPR(C)[Carbamidomethylation]RRH.		2	51	[]	[]	[]	[]		5.58618	TP-019	0	P|002	7108.86	79.2658	P1	P1 +1ph	+1ph	P1	P|002 → P1 +1ph
B	R03	B_R03	TP	441	2667000000	31.3126	0.580452	12.9558	7110.57	80.9756	80.9756	P04553	P1	['P1']	ARYRCCRSQSRSRYYRQRQRSRRRRRRSCQTRRRAMRCCRPRYRPRCRRH	M.ARYR(C)[Carbamidomethylation](C)[Carbamidomethylation]RSQ(SRS)[Phospho]RYYRQRQRSRRRRRRS(C)[Carbamidomethylation]QTRRRAMR(C)[Carbamidomethylation](C)[Carbamidomethylation]RPRYRPR(C)[Carbamidomethylation]RRH.	Phospho[S11:48.9%;S13:48.9%]	2	51	['S', 'S']	[11, 13]	[11, 13]	[48.9, 48.9]		20.1973	TP-019	1	P|002	7108.86	79.2658	P1	P1 +1ph	+1ph	P1	P|002 → P1 +1ph
B	R03	B_R03	TP	421	2667000000	31.3126	0.580452	12.368	7110.57	80.9772	80.9772	P04553	P1	['P1']	ARYRCCRSQSRSRYYRQRQRSRRRRRRSCQTRRRAMRCCRPRYRPRCRRH	M.ARYR(C)[Carbamidomethylation](C)[Carbamidomethylation]RSQ(SRS)[Phospho]RYYRQRQRSRRRRRRS(C)[Carbamidomethylation]QTRRRAMR(C)[Carbamidomethylation](C)[Carbamidomethylation]RPRYRPR(C)[Carbamidomethylation]RRH.	Phospho[S11:49.9%;S13:49.9%]	2	51	['S', 'S']	[11, 13]	[11, 13]	[49.9, 49.9]		21.6109	TP-019	1	P|002	7108.86	79.2658	P1	P1 +1ph	+1ph	P1	P|002 → P1 +1ph
A	R02	A_R02	TP	237	1283000000	30.2569	0.093331	7.13367	7110.57	80.9775	80.9775	P04553	P1	['P1']	ARYRCCRSQSRSRYYRQRQRSRRRRRRSCQTRRRAMRCCRPRYRPRCRRH	M.ARYR(C)[Carbamidomethylation](C)[Carbamidomethylation]RSQ(SRSRY)[81.1874]YRQRQRSRRRRRRS(C)[Carbamidomethylation]QTRRRAMR(C)[Carbamidomethylation](C)[Carbamidomethylation]RPRYRPR(C)[Carbamidomethylation]RRH.		2	51	[]	[]	[]	[]		7.18164	TP-016	0	P|002	7108.86	79.2658	P1	P1 +1ph	+1ph	P1	P|002 → P1 +1ph
A	R02	A_R02	TP	157	1283000000	30.2569	0.093331	4.71233	7110.57	80.978	80.978	P04553	P1	['P1']	ARYRCCRSQSRSRYYRQRQRSRRRRRRSCQTRRRAMRCCRPRYRPRCRRH	M.ARYR(C)[Carbamidomethylation](C)[Carbamidomethylation]RSQSR(SRYYRQRQRSRRRRRRS(C)[Carbamidomethylation]QTRRR)[81.1880]AMR(C)[Carbamidomethylation](C)[Carbamidomethylation]RPRYRPR(C)[Carbamidomethylation]RRH.		2	51	[]	[]	[]	[]		7.1997	TP-016	0	P|002	7108.86	79.2658	P1	P1 +1ph	+1ph	P1	P|002 → P1 +1ph
B	R03	B_R03	TP	154	2667000000	31.3126	0.580452	4.59783	7110.59	80.9981	80.9981	P04553	P1	['P1']	ARYRCCRSQSRSRYYRQRQRSRRRRRRSCQTRRRAMRCCRPRYRPRCRRH	M.ARYR(C)[Carbamidomethylation](C)[Carbamidomethylation]RSQSRSRYYRQR(QRSRRRRRRS(C)[Carbamidomethylation]QT)[81.2081]RRRAMR(C)[Carbamidomethylation](C)[Carbamidomethylation]RPRYRPR(C)[Carbamidomethylation]RRH.		2	51	[]	[]	[]	[]		11.4459	TP-019	0	P|002	7108.86	79.2658	P1	P1 +1ph	+1ph	P1	P|002 → P1 +1ph
B	R03	B_R03	PS	123	2425.59	11.2441	-1.95788	3.6636	7111.57	81.9759	81.9759	Sperm protamine P1	P1	['P1']	ARYRCCRSQSRSRYYRQRQRSRRRRRRSCQTRRRAMRCCRPRYRPRCRRH	ARYRccRSQsRSRYYRQRQRSRRRRRRScQTRRRAMRccRPRYRPRcRRH	C5(Carbamidomethyl); C6(Carbamidomethyl); S10(O-phospho-L-serine); C29(Carbamidomethyl); C38(Carbamidomethyl); C39(Carbamidomethyl); C47(Carbamidomethyl)	2	51	['S']	[10]	[11]	[]	31.0403	50.56	PS-075	1	P|002	7108.86	79.2658	P1	P1 +1ph	+1ph	P1	P|002 → P1 +1ph
B	R03	B_R03	PS	409	117674	16.8444	0.213541	12.017	7111.57	81.9759	81.9759	Sperm protamine P1	P1	['P1']	ARYRCCRSQSRSRYYRQRQRSRRRRRRSCQTRRRAMRCCRPRYRPRCRRH	ARYRccRSQsRSRYYRQRQRSRRRRRRScQTRRRAMRccRPRYRPRcRRH	C5(Carbamidomethyl); C6(Carbamidomethyl); S10(O-phospho-L-serine); C29(Carbamidomethyl); C38(Carbamidomethyl); C39(Carbamidomethyl); C47(Carbamidomethyl)	2	51	['S']	[10]	[11]	[]	39.703	78.98	PS-075	1	P|002	7108.86	79.2658	P1	P1 +1ph	+1ph	P1	P|002 → P1 +1ph
B	R03	B_R03	PS	385	80240.1	16.292	-0.000644484	11.3245	7113.57	83.9712	83.9712	Sperm protamine P1	P1	['P1']	ARYRCCRSQSRSRYYRQRQRSRRRRRRSCQTRRRAMRCCRPRYRPRCRRH	ARYRccRSQsRSRYYRQRQRSRRRRRRScQTRRRAMRccRPRYRPRcRRH	C5(Carbamidomethyl); C6(Carbamidomethyl); S10(O-phospho-L-serine); C29(Carbamidomethyl); C38(Carbamidomethyl); C39(Carbamidomethyl); C47(Carbamidomethyl)	2	51	['S']	[10]	[11]	[]	40.3272	99.09	PS-075	1	P|002	7108.86	79.2658	P1	P1 +1ph	+1ph	P1	P|002 → P1 +1ph
A	R02	A_R02	PS	373	27716.7	14.7585	-0.70346	11.0603	7113.58	83.9868	83.9868	Protamine-2	HP3	['pre-P2', 'HPI2', 'HPS1', 'HPS2', 'HP4', 'HP2', 'HP3']	GQSHYRRRHCSRRRLHRIHRRQHRSCRRRKRRSCRHRRRHRRGCRTRKRTCRRH	GQSHYRRRHcSRRRLHRIHRRQHRScRRRKRRScRHRRRHRRGcRTRKRTcRRH	C10(Carbamidomethyl); C26(Carbamidomethyl); C34(Carbamidomethyl); C44(Carbamidomethyl); C51(Carbamidomethyl)	49	102	[]	[]	[]	[]	1	20.96	PS-017	0	P|002	7108.86	79.2658	P1	P1 +1ph	+1ph	P1	P|002 → P1 +1ph
B	R03	B_R03	PS	199	1201.63	10.2308	-2.35079	5.9563	7114.56			Sperm protamine P1	P1	['P1']	ARYRCCRSQSRSRYYRQRQRSRRRRRRSCQTRRRAMRCCRPRYRPRCRRH	ARYRccRSQsRSRYYRQRQRSRRRRRRScQTRRRAMRccRPRYRPRcRRH	C5(Carbamidomethyl); C6(Carbamidomethyl); S10(O-phospho-L-serine); C29(Carbamidomethyl); C38(Carbamidomethyl); C39(Carbamidomethyl); C47(Carbamidomethyl)	2	51	['S']	[10]	[11]	[]	35.703	24.12	PS-075	1	Unclustered	10326.5		Unknown	Unknown	Unknown	Unidentified	Unclustered → Unknown
A	R01	A_R01	PS	526	148973	17.1847	0.0475266	15.0175	7143.62			Sperm protamine P1	P1	['P1']	ARYRCCRSQSRSRYYRQRQRSRRRRRRSCQTRRRAMRCCRPRYRPRCRRH	ARYRccRSQSRSRYYRQRQRSRRRRRRScQTRRRAMRccRPRYRPRcRRH	C5(Carbamidomethyl); C6(Carbamidomethyl); C29(Carbamidomethyl); C38(Carbamidomethyl); C39(Carbamidomethyl); C47(Carbamidomethyl)	2	51	[]	[]	[]	[]	1.20758	28.59	PS-008	0	Unclustered	10326.5		Unknown	Unknown	Unknown	Unidentified	Unclustered → Unknown
B	R03	B_R03	PS	515	212599	17.6978	0.544405	14.9035	7146.65	117.053	117.053	Sperm protamine P1	P1	['P1']	ARYRCCRSQSRSRYYRQRQRSRRRRRRSCQTRRRAMRCCRPRYRPRCRRH	ARYRccRSQSRSRYYRQRQRSRRRRRRScQTRRRAMRccRPRYRPRcRRH	C5(Carbamidomethyl); C6(Carbamidomethyl); C29(Carbamidomethyl); C38(Carbamidomethyl); C39(Carbamidomethyl); C47(Carbamidomethyl)	2	51	[]	[]	[]	[]	1.24395	24.35	PS-008	0	P|003	7151.59	121.996	P1	P1 +2(61)	+2(61)	P1	P|003 → P1 +2(61)
B	R04	B_R04	PS	533	3.21206e+06	21.6151	1.41315	15.1295	7147.61	118.016	118.016	Sperm protamine P1	P1	['P1']	ARYRCCRSQSRSRYYRQRQRSRRRRRRSCQTRRRAMRCCRPRYRPRCRRH	ARYRccRSQSRSRYYRQRQRSRRRRRRScQTRRRAMRccRPRYRPRcRRH	C5(Carbamidomethyl); C6(Carbamidomethyl); C29(Carbamidomethyl); C38(Carbamidomethyl); C39(Carbamidomethyl); C47(Carbamidomethyl)	2	51	[]	[]	[]	[]	1.73919	26.14	PS-008	0	P|003	7151.59	121.996	P1	P1 +2(61)	+2(61)	P1	P|003 → P1 +2(61)
B	R04	B_R04	PS	563	347389	18.4062	0.149776	15.818	7147.65	118.049	118.049	Sperm protamine P1	P1	['P1']	ARYRCCRSQSRSRYYRQRQRSRRRRRRSCQTRRRAMRCCRPRYRPRCRRH	ARYRccRSQSRSRYYRQRQRSRRRRRRScQTRRRAMRccRPRYRPRcRRH	C5(Carbamidomethyl); C6(Carbamidomethyl); C29(Carbamidomethyl); C38(Carbamidomethyl); C39(Carbamidomethyl); C47(Carbamidomethyl)	2	51	[]	[]	[]	[]	11.936	29.65	PS-008	0	P|003	7151.59	121.996	P1	P1 +2(61)	+2(61)	P1	P|003 → P1 +2(61)
B	R03	B_R03	PS	527	161358	17.2999	0.390137	15.1893	7148.64	119.047	119.047	Sperm protamine P1	P1	['P1']	ARYRCCRSQSRSRYYRQRQRSRRRRRRSCQTRRRAMRCCRPRYRPRCRRH	aRYRccRsQSRSRYYRQRQRSRRRRRRScQTRRRAMRccRPRYRPRcRRH	A1(alpha-amino acetylated residue); C5(Carbamidomethyl); C6(Carbamidomethyl); S8(O-phospho-L-serine); C29(Carbamidomethyl); C38(Carbamidomethyl); C39(Carbamidomethyl); C47(Carbamidomethyl)	2	51	['S']	[8]	[9]	[]	3.77599	5.5	PS-030	1	P|003	7151.59	121.996	P1	P1 +2(61)	+2(61)	P1	P|003 → P1 +2(61)
A	R02	A_R02	PS	519	167251	17.3517	0.369248	15.0866	7148.65	119.052	119.052	Sperm protamine P1	P1	['P1']	ARYRCCRSQSRSRYYRQRQRSRRRRRRSCQTRRRAMRCCRPRYRPRCRRH	ARYRccRSQSRSRYYRQRQRSRRRRRRScQTRRRAMRccRPRYRPRcRRH	C5(Carbamidomethyl); C6(Carbamidomethyl); C29(Carbamidomethyl); C38(Carbamidomethyl); C39(Carbamidomethyl); C47(Carbamidomethyl)	2	51	[]	[]	[]	[]	5.58381	19.53	PS-008	0	P|003	7151.59	121.996	P1	P1 +2(61)	+2(61)	P1	P|003 → P1 +2(61)
B	R03	B_R03	PS	519	459559	18.8099	0.975608	15.0003	7149.64	120.042	120.042	Sperm protamine P1	P1	['P1']	ARYRCCRSQSRSRYYRQRQRSRRRRRRSCQTRRRAMRCCRPRYRPRCRRH	ARYRccRSQSRSRYYRQRQRSRRRRRRScQTRRRAMRccRPRYRPRcRRH	C5(Carbamidomethyl); C6(Carbamidomethyl); C29(Carbamidomethyl); C38(Carbamidomethyl); C39(Carbamidomethyl); C47(Carbamidomethyl)	2	51	[]	[]	[]	[]	6.81357	17.52	PS-008	0	P|003	7151.59	121.996	P1	P1 +2(61)	+2(61)	P1	P|003 → P1 +2(61)
A	R01	A_R01	PS	842	34561.3	15.0769	-0.940869	24.0985	7149.65	120.05	120.05	Sperm protamine P1	P1	['P1']	ARYRCCRSQSRSRYYRQRQRSRRRRRRSCQTRRRAMRCCRPRYRPRCRRH	ARYRccRSQSRSRYYRQRQRSRRRRRRScQTRRRAMRccRPRYRPRcRRH	C5(Carbamidomethyl); C6(Carbamidomethyl); C29(Carbamidomethyl); C38(Carbamidomethyl); C39(Carbamidomethyl); C47(Carbamidomethyl)	2	51	[]	[]	[]	[]	1.08498	14.49	PS-008	0	P|003	7151.59	121.996	P1	P1 +2(61)	+2(61)	P1	P|003 → P1 +2(61)
A	R02	A_R02	PS	567	87754.2	16.4212	-0.0156545	16.4076	7149.65	120.051	120.051	Sperm protamine P1	P1	['P1']	ARYRCCRSQSRSRYYRQRQRSRRRRRRSCQTRRRAMRCCRPRYRPRCRRH	ARYRccRSQSRSRYYRQRQRSRRRRRRScQTRRRAMRccRPRYRPRcRRH	C5(Carbamidomethyl); C6(Carbamidomethyl); C29(Carbamidomethyl); C38(Carbamidomethyl); C39(Carbamidomethyl); C47(Carbamidomethyl)	2	51	[]	[]	[]	[]	1.56119	26.69	PS-008	0	P|003	7151.59	121.996	P1	P1 +2(61)	+2(61)	P1	P|003 → P1 +2(61)
B	R04	B_R04	PS	21	7326.96	12.839	-2.04209	0.5963	7149.65	120.056	120.056	Sperm protamine P1	P1	['P1']	ARYRCCRSQSRSRYYRQRQRSRRRRRRSCQTRRRAMRCCRPRYRPRCRRH	ARYRccRSQSRSRYYRQRQRSRRRRRRScQTRRRAMRccRPRYRPRcRRH	C5(Carbamidomethyl); C6(Carbamidomethyl); C29(Carbamidomethyl); C38(Carbamidomethyl); C39(Carbamidomethyl); C47(Carbamidomethyl)	2	51	[]	[]	[]	[]	16.6881	21.77	PS-008	0	P|003	7151.59	121.996	P1	P1 +2(61)	+2(61)	P1	P|003 → P1 +2(61)
A	R01	A_R01	PS	770	71838.5	16.1325	-0.44588	21.9898	7149.66	120.062	120.062	Protamine-2	HP3	['pre-P2', 'HPI2', 'HPS1', 'HPS2', 'HP4', 'HP2', 'HP3']	GQSHYRRRHCSRRRLHRIHRRQHRSCRRRKRRSCRHRRRHRRGCRTRKRTCRRH	GQSHYRRRHcSRRRLHRIHRRQHRScRRRKRRScRHRRRHRRGcRTRKRTcRRH	C10(Carbamidomethyl); C26(Carbamidomethyl); C34(Carbamidomethyl); C44(Carbamidomethyl); C51(Carbamidomethyl)	49	102	[]	[]	[]	[]	1	11.18	PS-017	0	P|003	7151.59	121.996	P1	P1 +2(61)	+2(61)	P1	P|003 → P1 +2(61)
A	R01	A_R01	PS	978	25013.5	14.6104	-1.15959	28.0632	7149.69	120.094	120.094	Sperm protamine P1	P1	['P1']	ARYRCCRSQSRSRYYRQRQRSRRRRRRSCQTRRRAMRCCRPRYRPRCRRH	ARYRccRSQSRSRYYRQRQRSRRRRRRScQTRRRAMRccRPRyRPRcRRH	C5(Carbamidomethyl); C6(Carbamidomethyl); C29(Carbamidomethyl); C38(Carbamidomethyl); C39(Carbamidomethyl); Y43(O4'-phospho-L-tyrosine); C47(Carbamidomethyl)	2	51	['Y']	[43]	[44]	[]	32.3046	14.95	PS-021	1	P|003	7151.59	121.996	P1	P1 +2(61)	+2(61)	P1	P|003 → P1 +2(61)
B	R04	B_R04	PS	227	24147.9	14.5596	-1.36467	6.7394	7150.61	121.018	121.018	Sperm protamine P1	P1	['P1']	ARYRCCRSQSRSRYYRQRQRSRRRRRRSCQTRRRAMRCCRPRYRPRCRRH	ARYRccRSQSRSRYYRQRQRSRRRRRRScQTRRRAMRccRPRYRPRcRRH	C5(Carbamidomethyl); C6(Carbamidomethyl); C29(Carbamidomethyl); C38(Carbamidomethyl); C39(Carbamidomethyl); C47(Carbamidomethyl)	2	51	[]	[]	[]	[]	2.62301	15.13	PS-008	0	P|003	7151.59	121.996	P1	P1 +2(61)	+2(61)	P1	P|003 → P1 +2(61)
B	R04	B_R04	PS	187	23748.6	14.5356	-1.37414	5.5401	7150.63	121.034	121.034	Sperm protamine P1	P1	['P1']	ARYRCCRSQSRSRYYRQRQRSRRRRRRSCQTRRRAMRCCRPRYRPRCRRH	ARYRccRSQSRSRYYRQRQRSRRRRRRScQTRRRAMRccRPRYRPRcRRH	C5(Carbamidomethyl); C6(Carbamidomethyl); C29(Carbamidomethyl); C38(Carbamidomethyl); C39(Carbamidomethyl); C47(Carbamidomethyl)	2	51	[]	[]	[]	[]	2.4679	21.65	PS-008	0	P|003	7151.59	121.996	P1	P1 +2(61)	+2(61)	P1	P|003 → P1 +2(61)
[truncated: 1,945 more rows]
